# Supplementary material for: Odd–even alternations in helical propensity of a homologous series of hydrocarbons
Source: Springer Nature journal article supplement (doi:10.1038/s41557-020-0429-0), 2020-03-02
Supplement: 41557_2020_429_MOESM89_ESM.cif [file 41557_2020_429_MOESM89_ESM.cif]

data_jp_3_130
_audit_creation_date               2019-06-19
_audit_creation_method
;
Olex2 1.2
(compiled 2018.05.29 svn.r3508 for OlexSys, GUI svn.r5506)
;
_shelxl_version_number             2013-4
_audit_contact_author_address      ?
_audit_contact_author_email        ?
_audit_contact_author_name         ''
_audit_contact_author_phone        ?
_publ_contact_author_id_orcid      ?
_publ_section_references
;
Dolomanov, O.V., Bourhis, L.J., Gildea, R.J, Howard, J.A.K. & Puschmann, H.
 (2009), J. Appl. Cryst. 42, 339-341.

Sheldrick, G.M. (2015). Acta Cryst. A71, 3-8.

Sheldrick, G.M. (2015). Acta Cryst. C71, 3-8.
;
_chemical_name_common              ?
_chemical_name_systematic
;
 ?
;
_chemical_formula_moiety           'C48 H68 N2, C4 H10 O'
_chemical_formula_sum              'C52 H78 N2 O'
_chemical_formula_weight           747.16
_chemical_absolute_configuration   unk
_chemical_melting_point            ?
loop_
  _atom_type_symbol
  _atom_type_description
  _atom_type_scat_dispersion_real
  _atom_type_scat_dispersion_imag
  _atom_type_scat_source
 'C' 'C' 0.0033 0.0016 'International Tables Vol C Tables 4.2.6.8 and 6.1.1.4'
 'H' 'H' 0.0000 0.0000 'International Tables Vol C Tables 4.2.6.8 and 6.1.1.4'
 'N' 'N' 0.0061 0.0033 'International Tables Vol C Tables 4.2.6.8 and 6.1.1.4'
 'O' 'O' 0.0106 0.0060 'International Tables Vol C Tables 4.2.6.8 and 6.1.1.4'

_shelx_space_group_comment
;
The symmetry employed for this shelxl refinement is uniquely defined
by the following loop, which should always be used as a source of
symmetry information in preference to the above space-group names.
They are only intended as comments.
;
_space_group_crystal_system        'orthorhombic'
_space_group_IT_number             18
_space_group_name_H-M_alt          'P 21 21 2'
_space_group_name_Hall             'P 2 2ab'
loop_
  _space_group_symop_operation_xyz
 'x, y, z'
 '-x, -y, z'
 '-x+1/2, y+1/2, -z'
 'x+1/2, -y+1/2, -z'

_cell_length_a                     13.2858(3)
_cell_length_b                     16.2747(4)
_cell_length_c                     10.7159(3)
_cell_angle_alpha                  90
_cell_angle_beta                   90
_cell_angle_gamma                  90
_cell_volume                       2317.02(10)
_cell_formula_units_Z              2
_cell_measurement_reflns_used      7710
_cell_measurement_temperature      100
_cell_measurement_theta_max        27.47
_cell_measurement_theta_min        2.28
_shelx_estimated_absorpt_T_max     ?
_shelx_estimated_absorpt_T_min     ?
_exptl_absorpt_coefficient_mu      0.062
_exptl_absorpt_correction_T_max    0.7456
_exptl_absorpt_correction_T_min    0.5877
_exptl_absorpt_correction_type     multi-scan
_exptl_absorpt_process_details    
 'SADABS-2016/2 (Bruker,2016/2) was used for absorption correction. wR2(int) was 0.0954 before and 0.0730 after correction. The Ratio of minimum to maximum transmission is 0.7882. The \l/2 correction factor is Not present.'
_exptl_crystal_colour              'clear colourless'
_exptl_crystal_colour_lustre       clear
_exptl_crystal_colour_modifier     .
_exptl_crystal_colour_primary      colourless
_exptl_crystal_density_diffrn      1.071
_exptl_crystal_density_meas        ?
_exptl_crystal_density_method      ?
_exptl_crystal_description         block
_exptl_crystal_F_000               824
_exptl_crystal_size_max            0.557
_exptl_crystal_size_mid            0.295
_exptl_crystal_size_min            0.251
_exptl_special_details
;
 ?
;
_exptl_transmission_factor_max     ?
_exptl_transmission_factor_min     ?
_diffrn_reflns_av_R_equivalents    0.0668
_diffrn_reflns_av_unetI/netI       0.0409
_diffrn_reflns_Laue_measured_fraction_full  1.000
_diffrn_reflns_Laue_measured_fraction_max  1.000
_diffrn_reflns_limit_h_max         16
_diffrn_reflns_limit_h_min         -16
_diffrn_reflns_limit_k_max         20
_diffrn_reflns_limit_k_min         -20
_diffrn_reflns_limit_l_max         13
_diffrn_reflns_limit_l_min         -13
_diffrn_reflns_number              38291
_diffrn_reflns_point_group_measured_fraction_full  1.000
_diffrn_reflns_point_group_measured_fraction_max  1.000
_diffrn_reflns_theta_full          25.242
_diffrn_reflns_theta_max           26.371
_diffrn_reflns_theta_min           1.900
_diffrn_ambient_temperature        100.05
_diffrn_detector                   'Bruker area detector'
_diffrn_detector_area_resol_mean   ?
_diffrn_detector_type              'CCD area detector'
_diffrn_measured_fraction_theta_full  1.000
_diffrn_measured_fraction_theta_max  1.000
_diffrn_measurement_device         'Bruker Apex II kappa CCD area detector'
_diffrn_measurement_device_type    'Bruker Apex II kappa CCD area detector'
_diffrn_measurement_method         '\f and \w scans'
_diffrn_radiation_monochromator    graphite
_diffrn_radiation_type             MoK\a
_diffrn_radiation_wavelength       0.71073
_diffrn_source                     'fine-focus sealed tube'
_reflns_Friedel_coverage           0.763
_reflns_Friedel_fraction_full      1.000
_reflns_Friedel_fraction_max       1.000
_reflns_number_gt                  4421
_reflns_number_total               4758
_reflns_special_details
;
 Reflections were merged by SHELXL according to the crystal
 class for the calculation of statistics and refinement.
 
 _reflns_Friedel_fraction is defined as the number of unique
 Friedel pairs measured divided by the number that would be
 possible theoretically, ignoring centric projections and
 systematic absences.
;
_reflns_threshold_expression       'I > 2\s(I)'
_computing_cell_refinement         ?
_computing_data_collection         ?
_computing_data_reduction          ?
_computing_molecular_graphics      'Olex2 (Dolomanov et al., 2009)'
_computing_publication_material    'Olex2 (Dolomanov et al., 2009)'
_computing_structure_refinement    'ShelXL (Sheldrick, 2015)'
_computing_structure_solution      'ShelXT (Sheldrick, 2015)'
_refine_diff_density_max           0.260
_refine_diff_density_min           -0.257
_refine_diff_density_rms           0.058
_refine_ls_extinction_coef         .
_refine_ls_extinction_method       none
_refine_ls_goodness_of_fit_ref     1.222
_refine_ls_hydrogen_treatment      constr
_refine_ls_matrix_type             full
_refine_ls_number_parameters       309
_refine_ls_number_reflns           4758
_refine_ls_number_restraints       242
_refine_ls_R_factor_all            0.0829
_refine_ls_R_factor_gt             0.0782
_refine_ls_restrained_S_all        1.207
_refine_ls_shift/su_max            0.000
_refine_ls_shift/su_mean           0.000
_refine_ls_structure_factor_coef   Fsqd
_refine_ls_weighting_details      
 'w=1/[\s^2^(Fo^2^)+3.5219P] where P=(Fo^2^+2Fc^2^)/3'
_refine_ls_weighting_scheme        calc
_refine_ls_wR_factor_gt            0.1619
_refine_ls_wR_factor_ref           0.1640
_refine_special_details
;
 Occupancies of the disordered phenyl groups refined with their sum set 
to equal 1.  Restraints and constraints were applied to maintain
sensible thermal and geometric parameters.  The disordered diethyl 
ether occupancies were necessarily fixed at 0.5 as the disorder was 
across a symmetry element.  Restraints and constraints were applied 
to maintain sensible thermal and geometric parameters.

Absolute structure not determined.
;
_olex2_refinement_description
;
1. Fixed Uiso
 At 1.2 times of:
  All C(H) groups, All C(H,H) groups, All C(H,H,H,H) groups
 At 1.5 times of:
  All C(H,H,H) groups
2. Restrained distances
 C27-C28 \\sim C25-C26
 with sigma of 0.01
 O1-C26 \\sim O1-C27
 with sigma of 0.01
3. Uiso/Uaniso restraints and constraints
C2 \\sim C3 \\sim C4 \\sim C5 \\sim C6 \\sim C7 \\sim C2A \\sim C7A \\sim C6A
\\sim C5A \\sim C4A \\sim C3A: within 2A with sigma of 0.01 and sigma for
terminal atoms of 0.02
O1 \\sim C25 \\sim C26 \\sim C27 \\sim C28: within 2A with sigma of 0.01 and
sigma for terminal atoms of 0.02
Uanis(C28) \\sim Ueq, Uanis(C27) \\sim Ueq, Uanis(O1) \\sim Ueq, Uanis(C26)
\\sim Ueq, Uanis(C25) \\sim Ueq: with sigma of 0.01 and sigma for terminal
atoms of 0.02
4. Others
 Sof(H1BC)=Sof(H1BD)=Sof(C2A)=Sof(C7A)=Sof(H7A)=Sof(C6A)=Sof(H6A)=Sof(C5A)=
 Sof(H5A)=Sof(C4A)=Sof(H4A)=Sof(C3A)=Sof(H3A)=1-FVAR(1)
 Sof(H1AA)=Sof(H1AB)=Sof(C2)=Sof(C3)=Sof(H3)=Sof(C4)=Sof(H4)=Sof(C5)=Sof(H5)=
 Sof(C6)=Sof(H6)=Sof(C7)=Sof(H7)=FVAR(1)
 Fixed Sof: O1(0.5) C25(0.5) H25A(0.5) H25B(0.5) H25C(0.5) C26(0.5) H26A(0.5)
 H26B(0.5) C27(0.5) H27A(0.5) H27B(0.5) C28(0.5) H28A(0.5) H28B(0.5) H28C(0.5)
5.a Ternary CH refined with riding coordinates:
 C15(H15), C16(H16), C17(H17), C18(H18), C19(H19)
5.b Secondary CH2 refined with riding coordinates:
 C1(H1AA,H1AB), C1(H1BC,H1BD), C8(H8A,H8B), C26(H26A,H26B), C27(H27A,H27B)
5.c Aromatic/amide H refined with riding coordinates:
 C10(H10), C11(H11), C12(H12), C13(H13), C14(H14), C3(H3), C4(H4), C5(H5),
 C6(H6), C7(H7), C7A(H7A), C6A(H6A), C5A(H5A), C4A(H4A), C3A(H3A)
5.d Fitted hexagon refined as free rotating group:
 C2(C3,C4,C5,C6,C7), C2A(C7A,C6A,C5A,C4A,C3A)
5.e Idealised Me refined as rotating group:
 C20(H20A,H20B,H20C), C21(H21A,H21B,H21C), C22(H22A,H22B,H22C), C23(H23A,H23B,
 H23C), C24(H24A,H24B,H24C), C25(H25A,H25B,H25C), C28(H28A,H28B,H28C)
;
_atom_sites_solution_hydrogens     geom
_atom_sites_solution_primary       dual
_atom_sites_solution_secondary     ?
loop_
  _atom_site_label
  _atom_site_type_symbol
  _atom_site_fract_x
  _atom_site_fract_y
  _atom_site_fract_z
  _atom_site_U_iso_or_equiv
  _atom_site_adp_type
  _atom_site_occupancy
  _atom_site_site_symmetry_order
  _atom_site_calc_flag
  _atom_site_refinement_flags_posn
  _atom_site_refinement_flags_adp
  _atom_site_refinement_flags_occupancy
  _atom_site_disorder_assembly
  _atom_site_disorder_group
 N1 N 0.7003(3) 0.7198(2) 0.5369(3) 0.0182(7) Uani 1 1 d . . . . .
 C1 C 0.5994(3) 0.7570(3) 0.5408(4) 0.0236(10) Uani 1 1 d . . . . .
 H1AA H 0.5659 0.7480 0.4595 0.028 Uiso 0.43(2) 1 calc R . P A 1
 H1AB H 0.6063 0.8170 0.5533 0.028 Uiso 0.43(2) 1 calc R . P A 1
 H1BC H 0.5624 0.7423 0.4638 0.028 Uiso 0.57(2) 1 calc R . P A 2
 H1BD H 0.6060 0.8175 0.5436 0.028 Uiso 0.57(2) 1 calc R . P A 2
 C8 C 0.7453(3) 0.7311(3) 0.4123(4) 0.0219(9) Uani 1 1 d . . . . .
 H8A H 0.8167 0.7139 0.4153 0.026 Uiso 1 1 calc R . . . .
 H8B H 0.7435 0.7902 0.3906 0.026 Uiso 1 1 calc R . . . .
 C9 C 0.6930(3) 0.6837(3) 0.3122(4) 0.0256(10) Uani 1 1 d . . . . .
 C10 C 0.6800(3) 0.7176(4) 0.1941(5) 0.0350(12) Uani 1 1 d . . . . .
 H10 H 0.7028 0.7720 0.1788 0.042 Uiso 1 1 calc R . . . .
 C11 C 0.6346(4) 0.6740(5) 0.0983(5) 0.0493(17) Uani 1 1 d . . . . .
 H11 H 0.6264 0.6984 0.0185 0.059 Uiso 1 1 calc R . . . .
 C12 C 0.6012(4) 0.5944(4) 0.1200(6) 0.057(2) Uani 1 1 d . . . . .
 H12 H 0.5703 0.5638 0.0550 0.068 Uiso 1 1 calc R . . . .
 C13 C 0.6132(4) 0.5605(4) 0.2355(7) 0.0484(16) Uani 1 1 d . . . . .
 H13 H 0.5907 0.5059 0.2497 0.058 Uiso 1 1 calc R . . . .
 C14 C 0.6574(4) 0.6037(3) 0.3329(5) 0.0343(12) Uani 1 1 d . . . . .
 H14 H 0.6636 0.5792 0.4130 0.041 Uiso 1 1 calc R . . . .
 C15 C 0.7656(3) 0.7494(2) 0.6397(4) 0.0177(8) Uani 1 1 d . . . . .
 H15 H 0.7219 0.7532 0.7154 0.021 Uiso 1 1 calc R . . . .
 C16 C 0.8491(3) 0.6869(3) 0.6709(4) 0.0174(8) Uani 1 1 d . . . . .
 H16 H 0.8924 0.6821 0.5949 0.021 Uiso 1 1 calc R . . . .
 C17 C 0.8081(3) 0.6004(3) 0.6983(4) 0.0198(9) Uani 1 1 d . . . . .
 H17 H 0.7593 0.5871 0.6302 0.024 Uiso 1 1 calc R . . . .
 C18 C 0.8898(3) 0.5315(2) 0.6968(4) 0.0167(8) Uani 1 1 d . . . . .
 H18 H 0.9344 0.5406 0.7707 0.020 Uiso 1 1 calc R . . . .
 C19 C 0.9578(3) 0.5332(2) 0.5791(4) 0.0144(8) Uani 1 1 d . . . . .
 H19 H 0.9917 0.5881 0.5771 0.017 Uiso 1 1 calc R . . . .
 C20 C 0.8080(4) 0.8360(3) 0.6177(5) 0.0280(11) Uani 1 1 d . . . . .
 H20A H 0.8632 0.8332 0.5571 0.042 Uiso 1 1 calc GR . . . .
 H20B H 0.8333 0.8583 0.6967 0.042 Uiso 1 1 calc GR . . . .
 H20C H 0.7547 0.8717 0.5853 0.042 Uiso 1 1 calc GR . . . .
 C21 C 0.9170(4) 0.7191(3) 0.7765(5) 0.0330(12) Uani 1 1 d . . . . .
 H21A H 0.9568 0.7656 0.7459 0.049 Uiso 1 1 calc GR . . . .
 H21B H 0.9622 0.6752 0.8042 0.049 Uiso 1 1 calc GR . . . .
 H21C H 0.8751 0.7371 0.8467 0.049 Uiso 1 1 calc GR . . . .
 C22 C 0.7488(4) 0.5985(3) 0.8213(5) 0.0370(13) Uani 1 1 d . . . . .
 H22A H 0.7157 0.5450 0.8304 0.055 Uiso 1 1 calc GR . . . .
 H22B H 0.6978 0.6420 0.8206 0.055 Uiso 1 1 calc GR . . . .
 H22C H 0.7949 0.6072 0.8914 0.055 Uiso 1 1 calc GR . . . .
 C23 C 0.8396(4) 0.4472(3) 0.7134(5) 0.0309(12) Uani 1 1 d . . . . .
 H23A H 0.7933 0.4372 0.6438 0.046 Uiso 1 1 calc GR . . . .
 H23B H 0.8020 0.4464 0.7921 0.046 Uiso 1 1 calc GR . . . .
 H23C H 0.8913 0.4043 0.7149 0.046 Uiso 1 1 calc GR . . . .
 C24 C 0.8945(4) 0.5261(3) 0.4594(4) 0.0226(9) Uani 1 1 d . . . . .
 H24A H 0.9365 0.5393 0.3869 0.034 Uiso 1 1 calc GR . . . .
 H24B H 0.8379 0.5646 0.4636 0.034 Uiso 1 1 calc GR . . . .
 H24C H 0.8688 0.4699 0.4514 0.034 Uiso 1 1 calc GR . . . .
 C2 C 0.5324(15) 0.7215(10) 0.6455(13) 0.027(3) Uani 0.43(2) 1 d . U P A 1
 C3 C 0.5020(15) 0.7664(8) 0.7491(15) 0.027(2) Uani 0.43(2) 1 d G U P A 1
 H3 H 0.5199 0.8227 0.7564 0.032 Uiso 0.43(2) 1 calc R . P A 1
 C4 C 0.4453(11) 0.7290(11) 0.8422(11) 0.034(3) Uani 0.43(2) 1 d G U P A 1
 H4 H 0.4245 0.7597 0.9130 0.040 Uiso 0.43(2) 1 calc R . P A 1
 C5 C 0.4192(10) 0.6466(10) 0.8317(11) 0.036(3) Uani 0.43(2) 1 d G U P A 1
 H5 H 0.3805 0.6210 0.8953 0.043 Uiso 0.43(2) 1 calc R . P A 1
 C6 C 0.4496(11) 0.6016(8) 0.7280(15) 0.033(3) Uani 0.43(2) 1 d G U P A 1
 H6 H 0.4317 0.5453 0.7208 0.040 Uiso 0.43(2) 1 calc R . P A 1
 C7 C 0.5062(13) 0.6391(9) 0.6349(13) 0.027(3) Uani 0.43(2) 1 d G U P A 1
 H7 H 0.5270 0.6083 0.5641 0.032 Uiso 0.43(2) 1 calc R . P A 1
 C2A C 0.5400(10) 0.7281(7) 0.6536(9) 0.023(2) Uani 0.57(2) 1 d . U P A 2
 C7A C 0.5160(9) 0.6458(7) 0.6710(10) 0.030(2) Uani 0.57(2) 1 d G U P A 2
 H7A H 0.5395 0.6057 0.6135 0.036 Uiso 0.57(2) 1 calc R . P A 2
 C6A C 0.4577(8) 0.6221(6) 0.7725(11) 0.035(2) Uani 0.57(2) 1 d G U P A 2
 H6A H 0.4413 0.5659 0.7844 0.041 Uiso 0.57(2) 1 calc R . P A 2
 C5A C 0.4233(7) 0.6808(8) 0.8566(8) 0.032(2) Uani 0.57(2) 1 d G U P A 2
 H5A H 0.3834 0.6646 0.9259 0.039 Uiso 0.57(2) 1 calc R . P A 2
 C4A C 0.4473(8) 0.7631(8) 0.8391(9) 0.035(2) Uani 0.57(2) 1 d G U P A 2
 H4A H 0.4238 0.8032 0.8966 0.042 Uiso 0.57(2) 1 calc R . P A 2
 C3A C 0.5056(11) 0.7868(6) 0.7377(11) 0.027(2) Uani 0.57(2) 1 d G U P A 2
 H3A H 0.5220 0.8431 0.7258 0.033 Uiso 0.57(2) 1 calc R . P A 2
 O1 O 0.9810(7) 0.5085(11) 0.1568(8) 0.069(3) Uani 0.5 1 d D U P B -1
 C25 C 0.8348(14) 0.4354(12) 0.077(2) 0.086(6) Uani 0.5 1 d D U P B -1
 H25A H 0.8773 0.4085 0.0141 0.129 Uiso 0.5 1 calc GR . P B -1
 H25B H 0.7677 0.4452 0.0416 0.129 Uiso 0.5 1 calc GR . P B -1
 H25C H 0.8290 0.4000 0.1503 0.129 Uiso 0.5 1 calc GR . P B -1
 C26 C 0.8810(13) 0.5154(11) 0.113(2) 0.076(5) Uani 0.5 1 d D U P B -1
 H26A H 0.8799 0.5527 0.0405 0.091 Uiso 0.5 1 calc R . P B -1
 H26B H 0.8394 0.5406 0.1797 0.091 Uiso 0.5 1 calc R . P B -1
 C27 C 1.0512(9) 0.5259(10) 0.0635(11) 0.058(3) Uani 0.5 1 d D U P B -1
 H27A H 1.0383 0.5812 0.0282 0.069 Uiso 0.5 1 calc R . P B -1
 H27B H 1.0456 0.4851 -0.0046 0.069 Uiso 0.5 1 calc R . P B -1
 C28 C 1.1540(11) 0.5229(12) 0.1196(16) 0.055(4) Uani 0.5 1 d D U P B -1
 H28A H 1.2021 0.5494 0.0632 0.083 Uiso 0.5 1 calc GR . P B -1
 H28B H 1.1737 0.4655 0.1326 0.083 Uiso 0.5 1 calc GR . P B -1
 H28C H 1.1536 0.5518 0.1999 0.083 Uiso 0.5 1 calc GR . P B -1

loop_
  _atom_site_aniso_label
  _atom_site_aniso_U_11
  _atom_site_aniso_U_22
  _atom_site_aniso_U_33
  _atom_site_aniso_U_23
  _atom_site_aniso_U_13
  _atom_site_aniso_U_12
 N1 0.0132(16) 0.0168(16) 0.0246(19) 0.0040(15) -0.0023(15) 0.0037(14)
 C1 0.020(2) 0.019(2) 0.032(2) 0.0060(19) -0.0026(19) 0.0045(18)
 C8 0.019(2) 0.022(2) 0.025(2) 0.0026(18) -0.0018(18) -0.0049(18)
 C9 0.016(2) 0.035(2) 0.026(2) -0.008(2) -0.0055(19) 0.0066(19)
 C10 0.020(2) 0.059(3) 0.026(2) -0.007(2) 0.004(2) 0.008(2)
 C11 0.031(3) 0.089(5) 0.028(3) -0.019(3) 0.001(2) 0.019(3)
 C12 0.029(3) 0.076(5) 0.065(4) -0.049(4) -0.024(3) 0.032(3)
 C13 0.029(3) 0.042(3) 0.074(5) -0.019(3) -0.021(3) 0.015(3)
 C14 0.021(2) 0.033(3) 0.049(3) -0.009(3) -0.014(2) 0.005(2)
 C15 0.019(2) 0.0106(17) 0.024(2) 0.0016(16) -0.0029(17) 0.0012(16)
 C16 0.0162(19) 0.0162(19) 0.020(2) -0.0016(17) -0.0042(17) 0.0021(16)
 C17 0.0165(19) 0.020(2) 0.023(2) 0.0046(18) 0.0073(18) 0.0069(18)
 C18 0.018(2) 0.0159(19) 0.017(2) 0.0020(16) -0.0013(17) 0.0054(16)
 C19 0.0172(19) 0.0091(17) 0.0167(19) 0.0024(15) 0.0002(16) 0.0008(16)
 C20 0.027(2) 0.014(2) 0.043(3) -0.0022(19) -0.015(2) -0.0007(19)
 C21 0.031(3) 0.027(2) 0.041(3) -0.013(2) -0.014(2) 0.011(2)
 C22 0.041(3) 0.035(3) 0.035(3) 0.013(2) 0.020(2) 0.016(2)
 C23 0.027(2) 0.025(2) 0.041(3) 0.012(2) 0.019(2) 0.006(2)
 C24 0.026(2) 0.024(2) 0.019(2) 0.0016(17) -0.0019(19) 0.0028(19)
 C2 0.019(5) 0.035(5) 0.027(5) 0.010(5) -0.004(5) 0.005(5)
 C3 0.021(5) 0.029(5) 0.031(5) 0.009(5) -0.005(4) 0.000(5)
 C4 0.026(4) 0.039(7) 0.036(5) 0.008(6) -0.001(4) 0.000(6)
 C5 0.024(5) 0.043(7) 0.040(6) 0.010(5) 0.001(5) 0.000(6)
 C6 0.024(5) 0.040(6) 0.036(6) 0.008(5) -0.003(5) 0.007(5)
 C7 0.020(5) 0.030(5) 0.031(6) 0.013(5) -0.007(5) 0.001(4)
 C2A 0.012(4) 0.029(4) 0.029(4) 0.010(4) -0.008(4) 0.000(3)
 C7A 0.023(4) 0.032(4) 0.036(5) 0.008(4) 0.000(5) 0.002(4)
 C6A 0.026(4) 0.037(5) 0.041(5) 0.012(4) 0.001(4) 0.002(4)
 C5A 0.021(4) 0.042(6) 0.034(4) 0.007(5) 0.003(3) 0.001(4)
 C4A 0.029(4) 0.039(6) 0.038(4) 0.005(5) -0.002(3) 0.003(5)
 C3A 0.016(4) 0.037(5) 0.029(4) 0.006(4) -0.005(3) 0.000(4)
 O1 0.051(7) 0.101(7) 0.054(4) -0.004(6) -0.017(4) 0.026(6)
 C25 0.067(10) 0.094(12) 0.098(13) -0.006(10) -0.033(10) 0.025(10)
 C26 0.061(8) 0.104(9) 0.063(7) 0.001(7) -0.029(7) 0.015(7)
 C27 0.053(6) 0.087(7) 0.033(5) -0.006(6) -0.012(5) 0.010(6)
 C28 0.032(7) 0.084(11) 0.049(8) -0.005(8) 0.007(7) 0.021(8)

_geom_special_details
;
 All esds (except the esd in the dihedral angle between two l.s. planes)
 are estimated using the full covariance matrix.  The cell esds are taken
 into account individually in the estimation of esds in distances, angles
 and torsion angles; correlations between esds in cell parameters are only
 used when they are defined by crystal symmetry.  An approximate (isotropic)
 treatment of cell esds is used for estimating esds involving l.s. planes.
;
loop_
  _geom_bond_atom_site_label_1
  _geom_bond_atom_site_label_2
  _geom_bond_distance
  _geom_bond_site_symmetry_2
  _geom_bond_publ_flag
 N1 C1 1.471(5) . ?
 N1 C8 1.475(5) . ?
 N1 C15 1.483(5) . ?
 C1 H1AA 0.9900 . ?
 C1 H1AB 0.9900 . ?
 C1 H1BC 0.9900 . ?
 C1 H1BD 0.9900 . ?
 C1 C2 1.544(11) . ?
 C1 C2A 1.518(8) . ?
 C8 H8A 0.9900 . ?
 C8 H8B 0.9900 . ?
 C8 C9 1.492(6) . ?
 C9 C10 1.391(7) . ?
 C9 C14 1.402(7) . ?
 C10 H10 0.9500 . ?
 C10 C11 1.385(8) . ?
 C11 H11 0.9500 . ?
 C11 C12 1.389(10) . ?
 C12 H12 0.9500 . ?
 C12 C13 1.365(10) . ?
 C13 H13 0.9500 . ?
 C13 C14 1.388(7) . ?
 C14 H14 0.9500 . ?
 C15 H15 1.0000 . ?
 C15 C16 1.542(5) . ?
 C15 C20 1.536(6) . ?
 C16 H16 1.0000 . ?
 C16 C17 1.538(6) . ?
 C16 C21 1.538(6) . ?
 C17 H17 1.0000 . ?
 C17 C18 1.560(5) . ?
 C17 C22 1.536(6) . ?
 C18 H18 1.0000 . ?
 C18 C19 1.551(5) . ?
 C18 C23 1.537(6) . ?
 C19 C19 1.557(8) 2_765 ?
 C19 H19 1.0000 . ?
 C19 C24 1.539(6) . ?
 C20 H20A 0.9800 . ?
 C20 H20B 0.9800 . ?
 C20 H20C 0.9800 . ?
 C21 H21A 0.9800 . ?
 C21 H21B 0.9800 . ?
 C21 H21C 0.9800 . ?
 C22 H22A 0.9800 . ?
 C22 H22B 0.9800 . ?
 C22 H22C 0.9800 . ?
 C23 H23A 0.9800 . ?
 C23 H23B 0.9800 . ?
 C23 H23C 0.9800 . ?
 C24 H24A 0.9800 . ?
 C24 H24B 0.9800 . ?
 C24 H24C 0.9800 . ?
 C2 C3 1.3900 . ?
 C2 C7 1.3900 . ?
 C3 H3 0.9500 . ?
 C3 C4 1.3900 . ?
 C4 H4 0.9500 . ?
 C4 C5 1.3900 . ?
 C5 H5 0.9500 . ?
 C5 C6 1.3900 . ?
 C6 H6 0.9500 . ?
 C6 C7 1.3900 . ?
 C7 H7 0.9500 . ?
 C2A C7A 1.3900 . ?
 C2A C3A 1.3900 . ?
 C7A H7A 0.9500 . ?
 C7A C6A 1.3900 . ?
 C6A H6A 0.9500 . ?
 C6A C5A 1.3900 . ?
 C5A H5A 0.9500 . ?
 C5A C4A 1.3900 . ?
 C4A H4A 0.9500 . ?
 C4A C3A 1.3900 . ?
 C3A H3A 0.9500 . ?
 O1 C26 1.412(14) . ?
 O1 C27 1.396(13) . ?
 C25 H25A 0.9800 . ?
 C25 H25B 0.9800 . ?
 C25 H25C 0.9800 . ?
 C25 C26 1.491(16) . ?
 C26 H26A 0.9900 . ?
 C26 H26B 0.9900 . ?
 C27 H27A 0.9900 . ?
 C27 H27B 0.9900 . ?
 C27 C28 1.493(14) . ?
 C28 H28A 0.9800 . ?
 C28 H28B 0.9800 . ?
 C28 H28C 0.9800 . ?

loop_
  _geom_angle_atom_site_label_1
  _geom_angle_atom_site_label_2
  _geom_angle_atom_site_label_3
  _geom_angle
  _geom_angle_site_symmetry_1
  _geom_angle_site_symmetry_3
  _geom_angle_publ_flag
 C1 N1 C8 110.1(3) . . ?
 C1 N1 C15 112.2(3) . . ?
 C8 N1 C15 113.3(3) . . ?
 N1 C1 H1AA 109.0 . . ?
 N1 C1 H1AB 109.0 . . ?
 N1 C1 H1BC 109.3 . . ?
 N1 C1 H1BD 109.3 . . ?
 N1 C1 C2 113.1(8) . . ?
 N1 C1 C2A 111.7(6) . . ?
 H1AA C1 H1AB 107.8 . . ?
 H1BC C1 H1BD 107.9 . . ?
 C2 C1 H1AA 109.0 . . ?
 C2 C1 H1AB 109.0 . . ?
 C2A C1 H1BC 109.3 . . ?
 C2A C1 H1BD 109.3 . . ?
 N1 C8 H8A 108.9 . . ?
 N1 C8 H8B 108.9 . . ?
 N1 C8 C9 113.4(4) . . ?
 H8A C8 H8B 107.7 . . ?
 C9 C8 H8A 108.9 . . ?
 C9 C8 H8B 108.9 . . ?
 C10 C9 C8 120.4(5) . . ?
 C10 C9 C14 118.0(5) . . ?
 C14 C9 C8 121.6(4) . . ?
 C9 C10 H10 119.2 . . ?
 C11 C10 C9 121.7(6) . . ?
 C11 C10 H10 119.2 . . ?
 C10 C11 H11 120.3 . . ?
 C10 C11 C12 119.5(6) . . ?
 C12 C11 H11 120.3 . . ?
 C11 C12 H12 120.3 . . ?
 C13 C12 C11 119.4(5) . . ?
 C13 C12 H12 120.3 . . ?
 C12 C13 H13 119.1 . . ?
 C12 C13 C14 121.7(6) . . ?
 C14 C13 H13 119.1 . . ?
 C9 C14 H14 120.2 . . ?
 C13 C14 C9 119.6(5) . . ?
 C13 C14 H14 120.2 . . ?
 N1 C15 H15 106.4 . . ?
 N1 C15 C16 111.5(3) . . ?
 N1 C15 C20 113.5(3) . . ?
 C16 C15 H15 106.4 . . ?
 C20 C15 H15 106.4 . . ?
 C20 C15 C16 112.0(3) . . ?
 C15 C16 H16 106.8 . . ?
 C17 C16 C15 113.0(3) . . ?
 C17 C16 H16 106.8 . . ?
 C17 C16 C21 112.3(4) . . ?
 C21 C16 C15 110.8(3) . . ?
 C21 C16 H16 106.8 . . ?
 C16 C17 H17 106.8 . . ?
 C16 C17 C18 114.1(3) . . ?
 C18 C17 H17 106.8 . . ?
 C22 C17 C16 111.4(4) . . ?
 C22 C17 H17 106.8 . . ?
 C22 C17 C18 110.6(3) . . ?
 C17 C18 H18 107.3 . . ?
 C19 C18 C17 113.7(3) . . ?
 C19 C18 H18 107.3 . . ?
 C23 C18 C17 109.7(4) . . ?
 C23 C18 H18 107.3 . . ?
 C23 C18 C19 111.3(3) . . ?
 C18 C19 C19 114.0(3) . 2_765 ?
 C18 C19 H19 107.2 . . ?
 C19 C19 H19 107.2 2_765 . ?
 C24 C19 C18 111.0(3) . . ?
 C24 C19 C19 109.9(3) . 2_765 ?
 C24 C19 H19 107.2 . . ?
 C15 C20 H20A 109.5 . . ?
 C15 C20 H20B 109.5 . . ?
 C15 C20 H20C 109.5 . . ?
 H20A C20 H20B 109.5 . . ?
 H20A C20 H20C 109.5 . . ?
 H20B C20 H20C 109.5 . . ?
 C16 C21 H21A 109.5 . . ?
 C16 C21 H21B 109.5 . . ?
 C16 C21 H21C 109.5 . . ?
 H21A C21 H21B 109.5 . . ?
 H21A C21 H21C 109.5 . . ?
 H21B C21 H21C 109.5 . . ?
 C17 C22 H22A 109.5 . . ?
 C17 C22 H22B 109.5 . . ?
 C17 C22 H22C 109.5 . . ?
 H22A C22 H22B 109.5 . . ?
 H22A C22 H22C 109.5 . . ?
 H22B C22 H22C 109.5 . . ?
 C18 C23 H23A 109.5 . . ?
 C18 C23 H23B 109.5 . . ?
 C18 C23 H23C 109.5 . . ?
 H23A C23 H23B 109.5 . . ?
 H23A C23 H23C 109.5 . . ?
 H23B C23 H23C 109.5 . . ?
 C19 C24 H24A 109.5 . . ?
 C19 C24 H24B 109.5 . . ?
 C19 C24 H24C 109.5 . . ?
 H24A C24 H24B 109.5 . . ?
 H24A C24 H24C 109.5 . . ?
 H24B C24 H24C 109.5 . . ?
 C3 C2 C1 123.4(10) . . ?
 C3 C2 C7 120.0 . . ?
 C7 C2 C1 116.5(10) . . ?
 C2 C3 H3 120.0 . . ?
 C4 C3 C2 120.0 . . ?
 C4 C3 H3 120.0 . . ?
 C3 C4 H4 120.0 . . ?
 C3 C4 C5 120.0 . . ?
 C5 C4 H4 120.0 . . ?
 C4 C5 H5 120.0 . . ?
 C6 C5 C4 120.0 . . ?
 C6 C5 H5 120.0 . . ?
 C5 C6 H6 120.0 . . ?
 C7 C6 C5 120.0 . . ?
 C7 C6 H6 120.0 . . ?
 C2 C7 H7 120.0 . . ?
 C6 C7 C2 120.0 . . ?
 C6 C7 H7 120.0 . . ?
 C7A C2A C1 121.6(7) . . ?
 C7A C2A C3A 120.0 . . ?
 C3A C2A C1 118.3(7) . . ?
 C2A C7A H7A 120.0 . . ?
 C2A C7A C6A 120.0 . . ?
 C6A C7A H7A 120.0 . . ?
 C7A C6A H6A 120.0 . . ?
 C7A C6A C5A 120.0 . . ?
 C5A C6A H6A 120.0 . . ?
 C6A C5A H5A 120.0 . . ?
 C4A C5A C6A 120.0 . . ?
 C4A C5A H5A 120.0 . . ?
 C5A C4A H4A 120.0 . . ?
 C5A C4A C3A 120.0 . . ?
 C3A C4A H4A 120.0 . . ?
 C2A C3A H3A 120.0 . . ?
 C4A C3A C2A 120.0 . . ?
 C4A C3A H3A 120.0 . . ?
 C27 O1 C26 112.1(13) . . ?
 H25A C25 H25B 109.5 . . ?
 H25A C25 H25C 109.5 . . ?
 H25B C25 H25C 109.5 . . ?
 C26 C25 H25A 109.5 . . ?
 C26 C25 H25B 109.5 . . ?
 C26 C25 H25C 109.5 . . ?
 O1 C26 C25 113.9(17) . . ?
 O1 C26 H26A 108.8 . . ?
 O1 C26 H26B 108.8 . . ?
 C25 C26 H26A 108.8 . . ?
 C25 C26 H26B 108.8 . . ?
 H26A C26 H26B 107.7 . . ?
 O1 C27 H27A 110.0 . . ?
 O1 C27 H27B 110.0 . . ?
 O1 C27 C28 108.4(11) . . ?
 H27A C27 H27B 108.4 . . ?
 C28 C27 H27A 110.0 . . ?
 C28 C27 H27B 110.0 . . ?
 C27 C28 H28A 109.5 . . ?
 C27 C28 H28B 109.5 . . ?
 C27 C28 H28C 109.5 . . ?
 H28A C28 H28B 109.5 . . ?
 H28A C28 H28C 109.5 . . ?
 H28B C28 H28C 109.5 . . ?

loop_
  _geom_torsion_atom_site_label_1
  _geom_torsion_atom_site_label_2
  _geom_torsion_atom_site_label_3
  _geom_torsion_atom_site_label_4
  _geom_torsion
  _geom_torsion_site_symmetry_1
  _geom_torsion_site_symmetry_2
  _geom_torsion_site_symmetry_3
  _geom_torsion_site_symmetry_4
  _geom_torsion_publ_flag
 N1 C1 C2 C3 112.1(9) . . . . ?
 N1 C1 C2 C7 -65.1(11) . . . . ?
 N1 C1 C2A C7A -61.5(9) . . . . ?
 N1 C1 C2A C3A 121.3(6) . . . . ?
 N1 C8 C9 C10 141.8(4) . . . . ?
 N1 C8 C9 C14 -39.5(6) . . . . ?
 N1 C15 C16 C17 -53.7(5) . . . . ?
 N1 C15 C16 C21 179.3(4) . . . . ?
 C1 N1 C8 C9 -67.7(5) . . . . ?
 C1 N1 C15 C16 155.2(3) . . . . ?
 C1 N1 C15 C20 -77.1(5) . . . . ?
 C1 C2 C3 C4 -177.1(15) . . . . ?
 C1 C2 C7 C6 177.3(14) . . . . ?
 C1 C2A C7A C6A -177.1(11) . . . . ?
 C1 C2A C3A C4A 177.2(11) . . . . ?
 C8 N1 C1 C2 158.4(8) . . . . ?
 C8 N1 C1 C2A 165.1(6) . . . . ?
 C8 N1 C15 C16 -79.4(4) . . . . ?
 C8 N1 C15 C20 48.4(5) . . . . ?
 C8 C9 C10 C11 177.9(4) . . . . ?
 C8 C9 C14 C13 -177.2(5) . . . . ?
 C9 C10 C11 C12 -0.1(8) . . . . ?
 C10 C9 C14 C13 1.5(7) . . . . ?
 C10 C11 C12 C13 0.3(8) . . . . ?
 C11 C12 C13 C14 0.5(9) . . . . ?
 C12 C13 C14 C9 -1.4(8) . . . . ?
 C14 C9 C10 C11 -0.8(7) . . . . ?
 C15 N1 C1 C2 -74.4(8) . . . . ?
 C15 N1 C1 C2A -67.7(7) . . . . ?
 C15 N1 C8 C9 165.8(3) . . . . ?
 C15 C16 C17 C18 165.3(3) . . . . ?
 C15 C16 C17 C22 -68.7(5) . . . . ?
 C16 C17 C18 C19 -49.6(5) . . . . ?
 C16 C17 C18 C23 -175.0(4) . . . . ?
 C17 C18 C19 C19 177.8(4) . . . 2_765 ?
 C17 C18 C19 C24 -57.4(5) . . . . ?
 C20 C15 C16 C17 177.8(4) . . . . ?
 C20 C15 C16 C21 50.7(5) . . . . ?
 C21 C16 C17 C18 -68.5(5) . . . . ?
 C21 C16 C17 C22 57.6(5) . . . . ?
 C22 C17 C18 C19 -176.1(4) . . . . ?
 C22 C17 C18 C23 58.5(5) . . . . ?
 C23 C18 C19 C19 -57.7(5) . . . 2_765 ?
 C23 C18 C19 C24 67.1(4) . . . . ?
 C2 C1 C2A C7A 43(11) . . . . ?
 C2 C1 C2A C3A -135(12) . . . . ?
 C2 C3 C4 C5 0.0 . . . . ?
 C3 C2 C7 C6 0.0 . . . . ?
 C3 C4 C5 C6 0.0 . . . . ?
 C4 C5 C6 C7 0.0 . . . . ?
 C5 C6 C7 C2 0.0 . . . . ?
 C7 C2 C3 C4 0.0 . . . . ?
 C2A C1 C2 C3 34(11) . . . . ?
 C2A C1 C2 C7 -144(12) . . . . ?
 C2A C7A C6A C5A 0.0 . . . . ?
 C7A C2A C3A C4A 0.0 . . . . ?
 C7A C6A C5A C4A 0.0 . . . . ?
 C6A C5A C4A C3A 0.0 . . . . ?
 C5A C4A C3A C2A 0.0 . . . . ?
 C3A C2A C7A C6A 0.0 . . . . ?
 C26 O1 C27 C28 176.2(15) . . . . ?
 C27 O1 C26 C25 98(2) . . . . ?

_shelx_res_file
;
TITL testo1_a.res in P2(1)2(1)2
REM Old TITL testo1 in P222(1)
REM SHELXT solution in P2(1)2(1)2
REM R1 0.217, Rweak 0.091, Alpha 0.018, Orientation a'=c, b'=a, c'=b
REM Flack x = 0.103 ( 1.426 ) from Parsons' quotients
REM Formula found by SHELXT: C53 N2
CELL 0.71073 13.2858 16.2747 10.7159 90 90 90
ZERR 2 0.0003 0.0004 0.0003 0 0 0
LATT -1
SYMM -X,-Y,+Z
SYMM 0.5-X,0.5+Y,-Z
SYMM 0.5+X,0.5-Y,-Z
SFAC C H N O
UNIT 104 156 4 2
SADI 0.01 C27 C28 C25 C26
SADI 0.01 O1 C26 O1 C27
SIMU 0.01 0.02 2 C2 C3 C4 C5 C6 C7 C2A C7A C6A C5A C4A C3A
SIMU 0.01 0.02 2 O1 C25 C26 C27 C28
ISOR 0.01 0.02 C28 C27 O1 C26 C25

L.S. 10 0 0
PLAN  5
TEMP -173.1
BOND $H
CONF
list 4
fmap 2 53
acta
SHEL 9999 0.8
REM <olex2.extras>
REM <HklSrc "%.\\JP_3_130.hkl">
REM </olex2.extras>

WGHT    0.000000    3.521900
FVAR       0.51820   0.42686
N1    3    0.700314    0.719790    0.536926    11.00000    0.01325    0.01677 =
         0.02458    0.00396   -0.00233    0.00371
C1    1    0.599427    0.756968    0.540837    11.00000    0.01980    0.01861 =
         0.03230    0.00604   -0.00255    0.00452
PART 1
AFIX  23
H1AA  2    0.565858    0.748037    0.459479    21.00000   -1.20000
H1AB  2    0.606347    0.816980    0.553263    21.00000   -1.20000
AFIX  23
PART 0
PART 2
H1BC  2    0.562370    0.742310    0.463838   -21.00000   -1.20000
H1BD  2    0.605977    0.817536    0.543553   -21.00000   -1.20000
AFIX   0
PART 0
C8    1    0.745257    0.731093    0.412262    11.00000    0.01852    0.02240 =
         0.02466    0.00257   -0.00183   -0.00489
AFIX  23
H8A   2    0.816703    0.713925    0.415253    11.00000   -1.20000
H8B   2    0.743508    0.790218    0.390645    11.00000   -1.20000
AFIX   0
C9    1    0.692958    0.683668    0.312236    11.00000    0.01628    0.03451 =
         0.02612   -0.00759   -0.00552    0.00663
C10   1    0.679957    0.717564    0.194121    11.00000    0.02042    0.05869 =
         0.02587   -0.00714    0.00439    0.00832
AFIX  43
H10   2    0.702764    0.771960    0.178789    11.00000   -1.20000
AFIX   0
C11   1    0.634628    0.674045    0.098350    11.00000    0.03149    0.08851 =
         0.02789   -0.01861    0.00076    0.01921
AFIX  43
H11   2    0.626444    0.698443    0.018453    11.00000   -1.20000
AFIX   0
C12   1    0.601212    0.594420    0.120019    11.00000    0.02950    0.07569 =
         0.06472   -0.04907   -0.02409    0.03249
AFIX  43
H12   2    0.570272    0.563845    0.054967    11.00000   -1.20000
AFIX   0
C13   1    0.613203    0.560499    0.235515    11.00000    0.02887    0.04173 =
         0.07449   -0.01862   -0.02064    0.01450
AFIX  43
H13   2    0.590683    0.505888    0.249687    11.00000   -1.20000
AFIX   0
C14   1    0.657442    0.603678    0.332869    11.00000    0.02112    0.03336 =
         0.04851   -0.00892   -0.01409    0.00477
AFIX  43
H14   2    0.663613    0.579181    0.412973    11.00000   -1.20000
AFIX   0
C15   1    0.765641    0.749440    0.639720    11.00000    0.01857    0.01061 =
         0.02401    0.00156   -0.00286    0.00123
AFIX  13
H15   2    0.721885    0.753158    0.715440    11.00000   -1.20000
AFIX   0
C16   1    0.849142    0.686882    0.670926    11.00000    0.01621    0.01624 =
         0.01973   -0.00160   -0.00420    0.00208
AFIX  13
H16   2    0.892439    0.682126    0.594934    11.00000   -1.20000
AFIX   0
C17   1    0.808126    0.600376    0.698301    11.00000    0.01653    0.01984 =
         0.02297    0.00460    0.00732    0.00692
AFIX  13
H17   2    0.759294    0.587098    0.630210    11.00000   -1.20000
AFIX   0
C18   1    0.889844    0.531541    0.696752    11.00000    0.01765    0.01588 =
         0.01668    0.00199   -0.00133    0.00540
AFIX  13
H18   2    0.934367    0.540625    0.770718    11.00000   -1.20000
AFIX   0
C19   1    0.957823    0.533212    0.579149    11.00000    0.01722    0.00914 =
         0.01671    0.00238    0.00023    0.00083
AFIX  13
H19   2    0.991725    0.588056    0.577139    11.00000   -1.20000
AFIX   0
C20   1    0.808019    0.836018    0.617733    11.00000    0.02690    0.01361 =
         0.04338   -0.00217   -0.01537   -0.00073
AFIX 137
H20A  2    0.863160    0.833234    0.557136    11.00000   -1.50000
H20B  2    0.833265    0.858350    0.696686    11.00000   -1.50000
H20C  2    0.754678    0.871726    0.585345    11.00000   -1.50000
AFIX   0
C21   1    0.916953    0.719126    0.776482    11.00000    0.03091    0.02731 =
         0.04075   -0.01318   -0.01387    0.01090
AFIX 137
H21A  2    0.956761    0.765637    0.745859    11.00000   -1.50000
H21B  2    0.962226    0.675220    0.804168    11.00000   -1.50000
H21C  2    0.875071    0.737061    0.846662    11.00000   -1.50000
AFIX   0
C22   1    0.748777    0.598457    0.821275    11.00000    0.04124    0.03462 =
         0.03500    0.01336    0.01978    0.01643
AFIX 137
H22A  2    0.715709    0.544963    0.830350    11.00000   -1.50000
H22B  2    0.697819    0.641992    0.820571    11.00000   -1.50000
H22C  2    0.794935    0.607191    0.891365    11.00000   -1.50000
AFIX   0
C23   1    0.839552    0.447212    0.713428    11.00000    0.02701    0.02496 =
         0.04085    0.01189    0.01945    0.00622
AFIX 137
H23A  2    0.793299    0.437153    0.643845    11.00000   -1.50000
H23B  2    0.801998    0.446408    0.792132    11.00000   -1.50000
H23C  2    0.891288    0.404303    0.714940    11.00000   -1.50000
AFIX   0
C24   1    0.894525    0.526086    0.459395    11.00000    0.02566    0.02363 =
         0.01852    0.00164   -0.00193    0.00277
AFIX 137
H24A  2    0.936516    0.539258    0.386918    11.00000   -1.50000
H24B  2    0.837900    0.564578    0.463568    11.00000   -1.50000
H24C  2    0.868842    0.469882    0.451426    11.00000   -1.50000
AFIX  66
PART 1
C2    1    0.532415    0.721468    0.645503    21.00000    0.01906    0.03522 =
         0.02723    0.01007   -0.00411    0.00484
C3    1    0.501971    0.766420    0.749137    21.00000    0.02064    0.02926 =
         0.03131    0.00908   -0.00522    0.00019
AFIX  43
H3    2    0.519863    0.822735    0.756353    21.00000   -1.20000
AFIX  65
C4    1    0.445349    0.728973    0.842212    21.00000    0.02554    0.03923 =
         0.03622    0.00777   -0.00060    0.00014
AFIX  43
H4    2    0.424542    0.759696    0.913041    21.00000   -1.20000
AFIX  65
C5    1    0.419170    0.646575    0.831654    21.00000    0.02435    0.04261 =
         0.04005    0.00969    0.00052   -0.00050
AFIX  43
H5    2    0.380471    0.620982    0.895267    21.00000   -1.20000
AFIX  65
C6    1    0.449613    0.601622    0.728020    21.00000    0.02352    0.04024 =
         0.03649    0.00762   -0.00301    0.00731
AFIX  43
H6    2    0.431721    0.545306    0.720805    21.00000   -1.20000
AFIX  65
C7    1    0.506235    0.639067    0.634944    21.00000    0.02011    0.02983 =
         0.03077    0.01277   -0.00749    0.00147
AFIX  43
H7    2    0.527042    0.608344    0.564116    21.00000   -1.20000
AFIX  66
PART 0
PART 2
C2A   1    0.540003    0.728131    0.653576   -21.00000    0.01236    0.02858 =
         0.02866    0.01006   -0.00773   -0.00016
C7A   1    0.516012    0.645793    0.670983   -21.00000    0.02309    0.03231 =
         0.03555    0.00783   -0.00044    0.00194
AFIX  43
H7A   2    0.539498    0.605691    0.613518   -21.00000   -1.20000
AFIX  65
C6A   1    0.457660    0.622128    0.772471   -21.00000    0.02595    0.03663 =
         0.04110    0.01202    0.00140    0.00176
AFIX  43
H6A   2    0.441264    0.565854    0.784368   -21.00000   -1.20000
AFIX  65
C5A   1    0.423297    0.680803    0.856552   -21.00000    0.02115    0.04197 =
         0.03364    0.00709    0.00272    0.00147
AFIX  43
H5A   2    0.383415    0.664629    0.925914   -21.00000   -1.20000
AFIX  65
C4A   1    0.447286    0.763142    0.839146   -21.00000    0.02938    0.03852 =
         0.03828    0.00481   -0.00200    0.00272
AFIX  43
H4A   2    0.423800    0.803243    0.896612   -21.00000   -1.20000
AFIX  65
C3A   1    0.505639    0.786807    0.737659   -21.00000    0.01624    0.03679 =
         0.02928    0.00647   -0.00499   -0.00015
AFIX  43
H3A   2    0.522034    0.843082    0.725762   -21.00000   -1.20000
AFIX   0

PART 0
PART -1
O1    4    0.980997    0.508533    0.156786    10.50000    0.05098    0.10092 =
         0.05424   -0.00373   -0.01707    0.02550
C25   1    0.834796    0.435399    0.076721    10.50000    0.06719    0.09360 =
         0.09768   -0.00645   -0.03331    0.02472
AFIX 137
H25A  2    0.877264    0.408496    0.014096    10.50000   -1.50000
H25B  2    0.767736    0.445178    0.041645    10.50000   -1.50000
H25C  2    0.829042    0.399979    0.150335    10.50000   -1.50000
AFIX   0
C26   1    0.880981    0.515364    0.113380    10.50000    0.06105    0.10388 =
         0.06328    0.00095   -0.02901    0.01543
AFIX  23
H26A  2    0.879904    0.552709    0.040464    10.50000   -1.20000
H26B  2    0.839358    0.540642    0.179699    10.50000   -1.20000
AFIX   0
C27   1    1.051157    0.525950    0.063512    10.50000    0.05349    0.08720 =
         0.03270   -0.00597   -0.01165    0.01050
AFIX  23
H27A  2    1.038264    0.581178    0.028239    10.50000   -1.20000
H27B  2    1.045639    0.485107   -0.004611    10.50000   -1.20000
AFIX   0
C28   1    1.153967    0.522894    0.119605    10.50000    0.03201    0.08417 =
         0.04912   -0.00470    0.00674    0.02074
AFIX 137
H28A  2    1.202064    0.549405    0.063156    10.50000   -1.50000
H28B  2    1.173666    0.465501    0.132620    10.50000   -1.50000
H28C  2    1.153648    0.551770    0.199856    10.50000   -1.50000
AFIX   0
HKLF 4

REM  testo1_a.res in P2(1)2(1)2
REM R1 =  0.0782 for    4421 Fo > 4sig(Fo)  and  0.0829 for all    4758 data
REM    309 parameters refined using    242 restraints

END

WGHT      0.0000      3.5222

REM Highest difference peak  0.260,  deepest hole -0.257,  1-sigma level  0.058
Q1    1   0.6195  0.4800  0.2900  11.00000  0.05    0.26
Q2    1   0.4034  0.6121  1.0235  11.00000  0.05    0.24
Q3    1   0.8320  0.3827  0.8535  11.00000  0.05    0.22
Q4    1   0.4461  0.8662  0.8963  11.00000  0.05    0.21
Q5    1   0.9956  0.5625  0.1316  11.00000  0.05    0.20
;
_shelx_res_checksum                51607
_shelx_hkl_file
;
   0   0   1 2424.16  147.19
   0   0  -1 2403.46  147.49
   0   0  -1 2364.36  147.59
   0   0  -1 2167.58  148.59
   0   0   1 2519.25  147.59
   0   0  -2 3933.21  254.47
   0   0  -2 4225.48  254.37
   0   0  -2 4112.89  258.17
   0   0   2 4087.39  254.97
   0   0   2 4154.38  255.67
   0   0  -2 4175.78  255.57
   0   0  -3   17.40    1.50
   0   0  -3   17.80    2.90
   0   0  -3   18.30    2.20
   0   0  -3   23.40    2.50
   0   0   3   21.00    2.10
   0   0   4  645.54   41.80
   0   0  -4  660.23   42.00
   0   0  -4  696.23   41.10
   0   0  -4  646.14   43.20
   0   0  -4  654.03   42.00
   0   0  -5  126.89    9.20
   0   0   5  116.29    9.10
   0   0  -5  116.09   10.40
   0   0  -5  138.29    8.20
   0   0  -5  125.19    9.40
   0   0  -6   43.20    3.20
   0   0  -6   45.50    4.60
   0   0  -6   43.60    6.60
   0   0  -6   41.30    4.40
   0   0   6   49.80    4.60
   0   0  -7   51.89    5.50
   0   0  -7   51.89    3.80
   0   0  -7   55.69    5.50
   0   0   7   62.29    5.60
   0   0  -7   53.89    7.00
   0   0  -8  139.89   13.80
   0   0   8  159.68   11.70
   0   0  -8  151.68   11.80
   0   0  -8  154.28   12.10
   0   0  -9   52.09    6.50
   0   0  -9   57.59    9.70
   0   0   9   56.99    6.70
   0   0  -9   57.29    7.30
   0   0 -10    4.00    3.90
   0   0 -10    3.20    2.80
   0   0 -10    2.90    2.60
   0   0  10    3.60    2.90
   0   0 -11    2.90    3.70
   0   0 -11    9.80    3.50
   0   0  11    3.30    2.70
   0   0 -11   10.40    4.30
   0   0 -12    3.50    2.80
   0   0 -12    5.10    4.50
   0   0  12   -0.70    2.60
   0   0 -12   -0.60    2.80
   0   0  13   14.00    4.30
   0   0 -13   28.10    8.40
   0   0 -13   18.30    5.60
   0   0 -13   17.20    5.00
   0   0 -14   14.60    4.80
   0   0  14   18.40    5.10
   0   0 -14   11.60    5.10
   0   0 -14   12.00    5.60
  -1   0   0    0.30    0.20
   1   0   0    0.10    0.10
  -1   0   0    0.00    0.20
   1   0   0    0.00    0.20
   1   0   0   -0.30    0.10
  -1   0   0    0.10    0.30
   1   0   0    0.10    0.30
  -1   0   0   -0.20    0.20
   1   0  -1    2.20    0.50
  -1   0  -1    2.20    0.90
   1   0  -1    1.80    0.40
  -1   0  -1    2.50    0.30
  -1   0   1    2.30    0.50
   1   0   1    2.20    0.50
   1   0   1    2.20    0.30
  -1   0  -1    2.00    0.50
  -1   0   1    4.30    0.50
  -1   0  -1    2.00    0.50
   1   0  -1    2.00    0.40
  -1   0   1    2.00    0.50
   1   0  -2  459.15   28.90
   1   0  -2  444.96   29.70
  -1   0  -2  457.45   29.00
   1   0   2  466.25   28.90
   1   0  -2  462.65   28.60
  -1   0  -2  449.66   29.60
   1   0  -2  461.15   28.90
  -1   0   2  464.75   28.90
  -1   0  -2  470.75   28.90
  -1   0   2  446.16   28.60
   1   0  -2  467.25   28.70
  -1   0   2  465.75   29.00
   1   0  -3  452.45   27.40
   1   0  -3  435.86   27.90
  -1   0   3  428.76   28.00
  -1   0  -3  440.96   28.90
   1   0   3  439.36   27.80
  -1   0  -3  433.86   27.90
   1   0  -3  431.76   27.90
   1   0   3  443.76   27.40
  -1   0  -3  440.76   27.90
  -1   0   3  430.16   27.80
   1   0  -3  440.86   29.00
   1   0  -4  264.07   16.70
  -1   0  -4  270.07   18.70
  -1   0  -4  255.77   17.40
  -1   0   4  266.67   17.60
   1   0   4  255.07   17.30
   1   0  -4  263.67   17.40
  -1   0  -4  276.47   17.50
   1   0  -4  260.67   17.40
  -1   0   4  247.18   17.20
   1   0  -4  263.57   18.80
   1   0   4  270.77   16.80
   1   0   5   22.10    2.10
  -1   0   5   23.90    3.20
  -1   0  -5   25.00    3.10
   1   0   5   24.20    3.10
  -1   0   5   22.70    2.80
   1   0  -5   29.60    3.10
   1   0  -5   19.10    3.90
  -1   0  -5   19.70    2.90
   1   0  -5   24.30    3.10
  -1   0  -5   18.70    3.90
   1   0  -5   20.30    2.00
  -1   0  -6   21.60    4.50
  -1   0  -6   32.10    4.10
   1   0  -6   24.00    4.80
  -1   0  -6   20.80    3.20
   1   0   6   23.40    3.20
   1   0   6   26.40    2.40
   1   0  -6   26.00    3.70
   1   0  -6   27.20    3.50
  -1   0   6   28.20    3.70
   1   0  -6   20.70    2.20
  -1   0   7   65.49    5.90
   1   0  -7   67.39    6.00
   1   0  -7   57.99    4.50
   1   0   7   59.49    4.70
   1   0  -7   65.49    6.10
   1   0  -7   59.19    7.60
  -1   0  -7   69.29    6.40
  -1   0  -7   61.79    5.80
   1   0   7   56.89    5.80
  -1   0  -7   65.59    7.70
   1   0  -8    8.50    1.50
  -1   0  -8    9.30    3.00
   1   0   8    7.50    1.60
  -1   0   8   12.80    2.80
  -1   0  -8    8.40    3.80
   1   0  -8    8.40    2.60
   1   0   8   10.80    3.00
  -1   0  -8   11.90    2.80
   1   0  -8    8.50    3.90
   1   0  -8   11.70    3.10
   1   0   9  336.97   23.80
   1   0  -9  338.07   23.90
  -1   0  -9  345.37   26.80
  -1   0  -9  338.27   24.00
   1   0  -9  366.26   24.30
  -1   0  -9  346.37   24.20
  -1   0   9  348.57   23.80
   1   0  -9  324.07   26.70
  -1   0 -10  138.69   15.00
  -1   0 -10  151.48   12.90
  -1   0 -10  147.29   12.40
   1   0 -10  162.58   15.70
  -1   0  10  160.88   12.60
   1   0 -10  154.28   12.90
   1   0  10  152.88   12.30
   1   0 -10  146.19   12.40
  -1   0 -11   55.49   10.60
  -1   0 -11   59.09    8.30
  -1   0  11   68.59    8.00
   1   0 -11   57.09   10.90
   1   0 -11   68.29    8.90
   1   0  11   50.09    7.00
   1   0 -11   55.99    7.50
  -1   0 -11   56.69    7.70
  -1   0  12    3.70    3.00
   1   0 -12    1.00    2.50
  -1   0 -12    1.70    3.60
   1   0 -12    1.90    3.70
   1   0  12    3.10    3.00
  -1   0 -12    1.90    3.50
  -1   0 -12    4.80    3.10
   1   0 -12   -1.00    3.20
  -1   0  13    5.10    3.50
  -1   0 -13    1.30    3.90
   1   0 -13    5.90    3.40
   1   0 -13    3.40    4.50
   1   0  13    5.60    3.60
  -1   0 -13    3.90    4.00
   1   0 -13    5.00    3.80
  -1   0 -13    7.90    3.50
   1   0  14    9.10    4.10
  -1   0 -14    6.20    4.70
   1   0 -14   13.50    5.10
   1   0 -14    0.90    3.80
   1   0 -14    4.40    3.70
  -1   0 -14   12.70    5.40
  -1   0  14    5.30    3.60
  -1   0 -14    3.40    3.10
  -2   0   0    3.80    1.20
  -2   0   0    9.40    1.00
   2   0   0    5.50    0.80
   2   0   0    5.80    0.80
   2   0   0    5.60    0.90
  -2   0   0    4.90    0.80
   2   0   0    5.60    0.80
   2   0   1  604.94   37.10
  -2   0   1  606.24   37.30
  -2   0   1  604.74   37.20
   2   0  -1  600.44   37.30
  -2   0  -1  595.74   37.20
   2   0  -1  601.74   37.20
   2   0   1  591.44   37.20
   2   0  -1  589.04   37.20
  -2   0  -1  601.74   38.30
   2   0  -1  585.74   37.20
  -2   0  -1  589.14   37.30
  -2   0   2   89.09    6.20
  -2   0  -2   86.99    6.20
  -2   0   2   92.69    6.10
   2   0  -2   89.09    6.00
   2   0  -2   88.09    6.10
  -2   0   2   90.49    5.90
   2   0   2   92.99    6.20
   2   0   2   89.09    6.00
   2   0   2   88.59    5.70
  -2   0  -2   86.49    7.70
  -2   0  -2   86.29    6.20
   2   0  -2   86.09    6.10
   2   0  -2   93.99    6.10
   2   0  -3  214.88   14.10
   2   0  -3  213.18   14.10
  -2   0  -3  216.98   15.40
   2   0   3  216.78   13.70
   2   0  -3  210.88   13.70
  -2   0  -3  210.68   14.10
  -2   0  -3  213.78   14.20
  -2   0   3  218.18   14.30
   2   0  -3  198.88   13.80
  -2   0   3  225.18   14.10
  -2   0   3  219.58   13.60
   2   0   3  209.78   14.00
   2   0   3  213.48   13.30
  -2   0  -4  180.68   14.10
   2   0  -4  189.98   12.80
  -2   0  -4  189.88   12.80
   2   0   4  185.48   12.10
   2   0   4  183.98   12.60
   2   0  -4  185.08   12.20
  -2   0  -4  193.88   12.80
   2   0  -4  182.28   12.00
   2   0  -4  190.38   12.70
  -2   0   4  188.08   12.90
   2   0  -4  196.78   14.30
  -2   0   4  180.38   12.60
  -2   0  -5    6.70    2.80
   2   0   5    4.50    1.70
   2   0  -5    1.70    1.80
   2   0   5    3.20    1.00
  -2   0   5    4.30    1.60
   2   0  -5    3.40    1.10
  -2   0   5    2.10    1.40
   2   0  -5    3.20    1.30
  -2   0  -5    6.10    1.90
  -2   0  -5    6.00    1.80
   2   0  -5    4.50    1.50
  -2   0  -6  127.29    9.70
   2   0  -6  127.69    8.80
   2   0  -6  127.79    8.50
   2   0  -6  134.59    9.80
   2   0   6  134.59    8.80
   2   0  -6  134.09   11.70
   2   0  -6  117.09    9.50
  -2   0  -6  139.59   10.00
   2   0   6  118.59    9.60
  -2   0  -6  119.39   11.30
  -2   0   6  128.39    9.90
  -2   0   6  127.39    9.50
   2   0   7   15.10    2.00
  -2   0  -7   15.80    3.20
  -2   0  -7   21.20    5.00
   2   0  -7   17.60    3.30
   2   0  -7   18.20    4.40
   2   0  -7   13.60    2.10
   2   0  -7   11.00    2.70
   2   0  -7   17.10    2.00
  -2   0   7   12.10    2.60
   2   0   7   20.70    3.50
  -2   0  -7   14.90    3.50
  -2   0   8   89.99    7.90
  -2   0  -8   86.69    8.30
   2   0  -8   86.29   10.10
   2   0   8   88.79    8.00
   2   0  -8   94.69    6.60
  -2   0  -8   84.49    9.90
  -2   0  -8   88.59    7.90
   2   0  -8   93.29    8.20
   2   0  -8   92.39    8.00
   2   0  -9    9.70    3.30
  -2   0  -9   16.20    3.90
   2   0  -9   10.40    4.10
  -2   0   9   13.70    3.40
   2   0  -9    8.20    2.80
  -2   0  -9   13.30    4.90
  -2   0  -9   12.00    3.30
   2   0   9    7.80    2.90
  -2   0 -10  141.29   12.00
   2   0 -10  142.79   14.90
  -2   0 -10  149.79   12.50
   2   0  10  140.99   11.80
   2   0 -10  154.78   12.30
  -2   0 -10  133.29   14.40
  -2   0  10  128.99   11.60
   2   0 -10  150.38   12.20
   2   0 -11    2.40    2.40
  -2   0  11    4.50    2.80
  -2   0 -11    6.10    4.20
  -2   0 -11    2.70    2.50
   2   0  11    8.80    3.50
   2   0 -11    4.50    3.20
  -2   0 -11    1.90    3.10
   2   0 -11    6.90    4.50
  -2   0 -12   44.90    9.90
   2   0  12   19.20    4.80
   2   0 -12   27.80    5.40
  -2   0 -12   22.80    5.00
  -2   0 -12   29.90    6.50
   2   0 -12   27.80    5.90
   2   0 -12   25.00    8.20
  -2   0  12   21.00    4.70
  -2   0 -13    2.20    3.80
   2   0 -13   -0.60    3.80
  -2   0 -13    3.00    3.90
   2   0 -13    2.30    3.00
  -2   0 -13    4.10    2.90
  -2   0  13    3.40    3.20
   2   0 -13   -0.60    3.50
   2   0  13    6.10    3.50
  -2   0 -14   12.50    5.60
   2   0 -14   19.20    5.70
  -2   0 -14   14.20    4.40
   2   0  14   17.40    4.80
   2   0 -14   17.00    5.40
  -2   0  14   12.40    4.60
   3   0   0   -0.20    0.70
  -3   0   0   -0.40    1.00
  -3   0   0   -0.10    0.80
  -3   0   0   -0.40    1.70
   3   0   0    0.20    0.90
   3   0   0   -0.10    0.90
   3   0  -1 9856.01  597.04
  -3   0   1 9872.51  596.84
   3   0   1 9504.65  597.14
  -3   0   1 9554.84  597.64
   3   0  -1 9569.34  597.34
  -3   0  -1 9330.17  599.64
  -3   0  -1 9473.55  597.74
  -3   0  -1 9551.04  597.14
   3   0  -1 9543.14  597.24
   3   0   1 9999.00  596.74
   3   0  -1 9737.13  597.14
  -3   0  -2  866.31   54.19
  -3   0  -2  860.21   54.29
   3   0  -2  891.91   54.09
  -3   0   2  900.61   54.19
  -3   0   2  844.42   54.29
   3   0  -2  814.52   54.19
   3   0  -2  905.41   54.19
  -3   0  -2  834.72   55.89
   3   0   2  911.21   53.89
   3   0  -2  877.81   54.19
   3   0   2  835.92   54.19
   3   0  -3 1155.08   70.39
  -3   0   3 1105.19   70.29
  -3   0  -3 1117.39   70.79
   3   0   3 1075.89   70.59
  -3   0  -3 1145.19   72.49
  -3   0   3 1144.29   70.59
  -3   0  -3 1104.19   70.69
  -3   0   3 1117.29   70.79
   3   0  -3 1128.09   70.69
   3   0  -3 1150.58   70.79
   3   0   3 1172.48   70.09
   3   0  -3 1160.08   70.59
  -3   0  -4 1801.62  112.59
   3   0  -4 1826.92  112.59
   3   0  -4 1862.11  112.19
   3   0   4 1787.22  112.49
  -3   0  -4 1768.52  114.29
   3   0   4 1870.91  112.09
  -3   0  -4 1781.72  112.59
  -3   0   4 1789.72  112.39
  -3   0   4 1789.42  111.89
   3   0   4 1848.12  111.49
  -3   0   4 1760.32  112.69
   3   0  -4 1796.22  111.99
   3   0  -4 1787.62  112.59
  -3   0   5  860.41   56.09
   3   0  -5  903.41   55.79
  -3   0  -5  884.91   58.29
   3   0  -5  891.41   56.29
   3   0  -5  880.41   55.49
  -3   0   5  895.51   56.59
  -3   0  -5  892.51   56.39
  -3   0  -5  861.81   56.39
   3   0   5  924.91   55.69
   3   0   5  906.81   56.29
   3   0  -5  879.71   56.39
   3   0   6   22.30    2.50
   3   0   6   28.60    3.70
  -3   0  -6   26.50    5.50
   3   0  -6   21.10    3.30
  -3   0   6   34.80    3.90
   3   0  -6   22.00    3.30
   3   0  -6   25.30    2.50
   3   0  -6   27.50    3.00
  -3   0  -6   21.30    3.50
  -3   0   6   26.00    3.90
  -3   0  -6   33.20    4.10
  -3   0   7   14.90    3.00
  -3   0  -7   14.90    3.30
  -3   0  -7   20.00    3.60
   3   0  -7   18.10    3.40
   3   0  -7   18.00    2.60
  -3   0  -7   15.10    4.70
   3   0  -7   21.60    3.70
   3   0  -7   20.20    2.40
   3   0   7   22.20    3.70
   3   0  -7   15.90    4.50
   3   0   7   23.00    2.60
  -3   0   7   15.50    3.60
   3   0  -8    5.20    1.70
  -3   0  -8    8.60    3.20
   3   0  -8    6.00    2.80
  -3   0  -8    4.60    2.40
  -3   0   8    2.90    2.40
   3   0  -8    7.70    4.10
   3   0   8    5.90    2.40
  -3   0  -8    3.10    3.30
   3   0  -8    4.00    2.10
  -3   0  -9   49.70    8.70
  -3   0  -9   35.40    5.60
   3   0  -9   44.90    6.00
  -3   0  -9   44.10    6.00
   3   0   9   33.10    5.20
   3   0  -9   45.30    6.30
   3   0  -9   42.20    8.20
  -3   0   9   41.40    5.50
   3   0 -10    0.40    1.90
   3   0  10    3.50    2.80
  -3   0 -10   -0.30    2.00
  -3   0 -10    1.60    3.00
  -3   0  10    2.10    2.80
   3   0 -10    2.00    3.30
   3   0 -10    5.50    3.10
  -3   0 -10    2.20    3.50
   3   0 -11    1.50    3.10
   3   0 -11    2.20    2.50
  -3   0 -11    1.10    2.60
   3   0  11    1.30    2.60
  -3   0 -11    0.50    2.60
  -3   0  11    3.50    3.00
  -3   0 -11   -1.70    2.70
   3   0 -12    3.80    3.60
  -3   0 -12    6.90    3.90
   3   0 -12    6.30    3.30
   3   0  12    4.30    3.10
  -3   0 -12    6.30    3.10
  -3   0  12    6.90    3.60
  -3   0 -12    4.60    3.50
   3   0 -13    0.40    3.80
   3   0  13   10.20    4.10
  -3   0 -13    5.30    3.20
  -3   0 -13    7.60    4.70
   3   0 -13    7.50    3.50
  -3   0  13    6.40    3.70
  -3   0 -13    3.00    4.30
   4   0   0  262.87   16.90
  -4   0   0  274.97   17.00
   4   0   0  256.87   16.90
   4   0   0  256.07   16.80
  -4   0   0  261.47   18.40
  -4   0   0  260.67   16.80
   4   0  -1  350.06   23.00
   4   0  -1  362.36   23.20
   4   0   1  380.36   23.00
  -4   0  -1  335.77   23.10
   4   0   1  349.96   23.00
  -4   0  -1  363.06   23.00
   4   0   1  362.76   23.20
  -4   0   1  369.56   23.00
  -4   0  -1  340.27   24.70
   4   0  -1  408.76   23.30
  -4   0   1  366.26   23.20
   4   0  -1  360.16   23.00
  -4   0  -2   82.99    8.60
  -4   0   2   69.49    5.70
  -4   0   2   69.79    5.80
   4   0   2   82.79    5.50
   4   0  -2   97.29    5.90
   4   0  -3  148.69   10.10
  -4   0  -3  153.88   12.80
   4   0  -3  144.19   10.10
  -4   0  -3  150.88   10.30
   4   0   3  148.69   10.10
  -4   0   3  145.29   10.20
   4   0  -3  141.69    9.90
  -4   0   3  150.38   10.10
   4   0   3  140.29    9.50
  -4   0  -3  148.69   10.10
   4   0  -3  142.79   10.00
  -4   0  -4  136.39    9.60
  -4   0   4  127.89    9.50
   4   0  -4  127.79    9.20
  -4   0   4  133.49    8.90
  -4   0   4  126.19    9.30
  -4   0  -4  139.69    9.50
   4   0  -4  132.29    9.40
  -4   0  -4  131.39   11.70
   4   0  -4  130.29    9.40
   4   0   4  127.59    9.40
   4   0   4  132.69    8.50
   4   0  -4  131.69    9.00
  -4   0   5  875.81   56.09
   4   0  -5  886.41   55.89
  -4   0  -5  903.51   56.39
  -4   0  -5  916.61   58.69
   4   0  -5  882.81   56.29
  -4   0   5  872.81   56.49
  -4   0   5  893.51   55.49
   4   0   5  872.61   56.19
  -4   0  -5  883.01   56.39
   4   0  -5  891.81   55.59
   4   0  -5  887.91   56.29
   4   0  -6    5.70    1.60
  -4   0  -6    6.30    4.00
  -4   0  -6    4.00    2.20
   4   0  -6    6.20    2.20
  -4   0   6    7.30    2.20
   4   0   6    8.30    2.30
   4   0  -6    5.90    1.70
   4   0  -6   10.40    2.50
  -4   0   6    5.70    2.00
  -4   0  -6    7.50    2.20
  -4   0  -7   24.00    4.10
  -4   0   7   25.20    4.10
   4   0  -7   21.70    2.70
   4   0  -7   22.80    3.50
  -4   0  -7   19.60    3.30
   4   0  -7   17.00    2.80
  -4   0   7   19.80    3.50
   4   0   7   22.80    3.50
  -4   0  -7   18.30    5.00
   4   0  -7   29.60    4.30
  -4   0  -8   18.10    3.70
   4   0  -8   24.90    4.40
  -4   0  -8   19.60    5.80
  -4   0  -8   17.70    3.90
  -4   0   8   18.60    3.70
  -4   0   8   13.70    3.70
   4   0   8   17.60    3.50
   4   0  -8   22.60    3.20
   4   0  -8   23.90    4.20
  -4   0  -9  136.19   11.80
   4   0  -9  155.08   12.20
   4   0   9  145.39   11.90
   4   0  -9  151.58   10.70
  -4   0   9  142.09   11.80
   4   0  -9  141.39   11.80
  -4   0  -9  156.18   12.30
  -4   0  -9  147.39   14.60
   4   0  10   23.20    4.50
  -4   0 -10   18.40    4.30
   4   0 -10   23.80    4.60
  -4   0 -10   28.90    7.50
   4   0 -10   30.30    5.50
  -4   0 -10   24.20    4.80
  -4   0  10   26.00    4.90
  -4   0 -11    2.40    3.40
   4   0 -11    1.00    2.50
   4   0  11   -0.70    2.30
  -4   0 -11    5.20    3.00
  -4   0  11    3.20    2.90
   4   0 -11    7.60    3.30
  -4   0 -11    7.40    4.10
  -4   0  12   59.99    8.10
  -4   0 -12   74.59    9.70
   4   0  12   55.29    8.10
  -4   0 -12   60.09    8.50
   4   0 -12   67.39    9.30
   4   0 -12   91.09   10.70
  -4   0 -12   56.59   11.00
   4   0 -13   34.20    6.70
  -4   0  13   31.30    6.00
   4   0 -13   33.00    6.90
  -4   0 -13   29.80    6.60
  -4   0 -13   19.60    5.10
   4   0  13   19.00    5.10
  -4   0 -13   36.70    8.90
  -5   0   0    0.20    1.10
  -5   0   0    0.50    1.50
   5   0   0   -0.30    1.00
   5   0   0    0.50    1.30
  -5   0   0    2.90    3.00
   5   0   0    1.30    1.30
  -5   0  -1   65.99    5.50
  -5   0   1   68.69    7.40
   5   0  -1   76.39    5.30
   5   0   1   72.79    5.20
   5   0   1   65.69    5.40
  -5   0   1   68.79    5.30
   5   0  -1   76.59    5.40
   5   0  -1   72.19    5.40
  -5   0   1   68.09    5.40
  -5   0  -1   67.19    5.10
  -5   0  -1   67.69    7.50
   5   0  -1   64.39    5.20
   5   0   1   69.99    5.30
  -5   0   2  410.86   25.60
   5   0  -2  393.96   25.70
  -5   0  -2  410.66   25.70
  -5   0  -2  382.66   25.80
   5   0  -2  400.46   25.60
   5   0   2  405.96   25.70
  -5   0   2  409.26   25.80
  -5   0  -2  429.26   28.60
   5   0   2  390.46   25.50
   5   0  -2  390.46   25.60
   5   0  -2  390.96   25.80
  -5   0  -3  256.67   16.70
  -5   0   3  248.68   16.70
  -5   0  -3  244.28   16.50
   5   0  -3  253.47   16.60
   5   0  -3  242.58   16.40
   5   0   3  247.78   16.50
   5   0   3  249.18   16.10
   5   0  -3  234.88   16.40
  -5   0   3  257.57   16.40
  -5   0  -3  255.57   19.50
   5   0  -3  251.07   16.50
   5   0   4   18.30    2.80
  -5   0   4   17.50    2.70
  -5   0   4   19.20    2.90
  -5   0  -4   17.90    2.70
   5   0  -4   18.50    2.70
  -5   0  -4   20.70    3.20
  -5   0  -4   20.30    5.50
   5   0  -4   17.10    2.50
   5   0  -4   19.40    2.80
   5   0  -4   18.20    2.70
   5   0   4   19.90    2.00
  -5   0   4   19.90    2.50
  -5   0  -5   89.69   10.00
   5   0  -5   87.39    6.90
  -5   0   5   85.69    6.20
  -5   0   5   84.29    6.90
   5   0   5   85.89    7.00
  -5   0   5   82.89    7.10
  -5   0  -5   85.69    7.00
   5   0   5   82.09    5.80
   5   0  -5   78.59    6.60
  -5   0  -5   88.39    7.10
   5   0  -5   88.39    7.00
   5   0  -5   83.69    6.40
   5   0  -6    8.50    2.20
  -5   0  -6   13.40    2.80
   5   0  -6   19.10    3.10
  -5   0  -6   24.20    5.70
   5   0  -6   13.70    2.30
   5   0   6   16.70    3.00
  -5   0  -6   14.40    3.20
  -5   0   6   18.20    3.20
  -5   0   6   17.00    2.20
  -5   0   6   14.70    3.00
   5   0  -6   18.10    3.10
  -5   0  -7  118.29   10.20
   5   0   7  128.09   10.20
   5   0  -7  137.69    9.60
  -5   0  -7  123.39   12.60
  -5   0   7  126.79   10.10
   5   0  -7  134.69   10.30
  -5   0   7  132.19   10.50
  -5   0  -7  119.69   10.10
   5   0  -7  125.79    9.10
   5   0  -7  132.49   10.20
   5   0  -8   30.70    4.80
  -5   0  -8   33.40    7.00
   5   0  -8   27.80    3.90
  -5   0  -8   27.30    4.80
   5   0   8   32.50    4.80
  -5   0  -8   31.20    4.80
  -5   0   8   28.70    4.90
  -5   0   8   41.20    5.20
   5   0  -8   29.10    4.60
   5   0  -9   45.30    4.80
   5   0  -9   37.30    5.50
   5   0   9   29.20    5.10
   5   0  -9   43.90    5.80
  -5   0  -9   38.80    5.50
  -5   0   9   39.00    5.50
  -5   0  -9   35.60    5.80
  -5   0  -9   37.50    7.80
  -5   0 -10    6.50    3.50
  -5   0 -10    7.80    3.10
  -5   0  10    5.80    3.30
   5   0 -10    3.60    2.70
   5   0  10    3.80    2.90
   5   0 -10    4.40    3.00
  -5   0 -10    6.10    3.80
  -5   0 -11    7.10    4.30
  -5   0 -11    2.90    2.70
   5   0  11    9.00    3.60
   5   0 -11    9.20    4.00
  -5   0  11   12.10    3.90
  -5   0 -11   10.30    3.80
   5   0 -11    8.10    3.50
  -5   0 -12   18.90    6.30
   5   0  12    5.90    3.40
  -5   0 -12   10.40    4.70
   5   0 -12    9.60    4.60
  -5   0 -12   11.20    4.10
  -5   0  12   13.80    4.10
   5   0 -12   12.40    4.10
  -5   0 -13    9.00    4.80
   5   0 -13    7.40    3.90
   5   0  13    4.20    3.40
  -5   0 -13    7.10    4.00
  -5   0 -13    5.70    4.50
  -6   0   0   21.60    5.00
   6   0   0   13.20    2.20
  -6   0   0   16.40    2.30
  -6   0   0   16.30    2.60
   6   0   0   18.40    2.50
   6   0   0   15.80    2.30
  -6   0  -1    9.00    1.60
  -6   0   1    5.10    1.70
  -6   0   1    7.00    1.80
   6   0   1    8.10    1.70
  -6   0  -1    5.30    3.60
   6   0   1   11.60    1.90
   6   0  -1   10.40    1.80
  -6   0   1   13.60    3.90
   6   0   1    8.90    2.10
  -6   0  -2  274.47   17.60
   6   0   2  271.67   17.50
  -6   0  -2  289.87   21.10
   6   0  -2  266.17   17.70
  -6   0   2  266.57   17.60
  -6   0  -2  259.57   17.80
   6   0  -2  261.87   17.50
   6   0  -2  238.48   17.40
   6   0  -2  273.57   17.80
   6   0   2  262.67   17.80
  -6   0   2  267.57   17.70
   6   0   2  285.07   17.60
   6   0  -3  706.43   44.60
  -6   0   3  715.63   44.40
  -6   0  -3  690.23   44.40
   6   0  -3  687.53   44.30
   6   0   3  709.13   44.40
   6   0   3  711.63   44.10
   6   0  -3  686.53   44.40
   6   0  -3  713.93   44.40
  -6   0  -3  695.23   47.80
  -6   0   3  699.73   44.60
  -6   0  -3  679.63   44.50
   6   0  -4   -0.30    1.40
  -6   0  -4    2.80    1.90
  -6   0  -4    1.20    4.30
  -6   0   4    0.00    1.30
   6   0   4    0.90    1.50
   6   0  -4    1.60    1.50
   6   0  -4    1.10    1.30
  -6   0  -4    2.30    1.50
  -6   0   4    1.00    1.50
   6   0  -4    0.60    1.40
   6   0   4    0.50    1.00
  -6   0  -5  278.57   22.70
  -6   0  -5  277.77   19.40
  -6   0   5  270.57   18.50
   6   0   5  281.97   19.10
  -6   0  -5  300.17   19.30
   6   0  -5  269.47   19.10
   6   0  -5  279.97   19.10
   6   0  -5  287.87   18.80
  -6   0   5  278.77   19.30
   6   0  -5  292.37   19.00
  -6   0   5  274.37   19.00
   6   0   5  294.67   18.20
  -6   0  -6   45.90    5.80
   6   0  -6   48.70    4.90
   6   0  -6   56.09    5.30
  -6   0  -6   49.99    8.70
   6   0  -6   43.60    4.90
  -6   0   6   47.30    4.20
   6   0  -6   47.10    4.50
  -6   0   6   42.60    5.20
  -6   0  -6   48.90    5.10
   6   0   6   53.99    5.30
  -6   0   6   48.50    5.30
   6   0   6   50.99    3.70
   6   0  -7    4.80    2.40
   6   0  -7    3.40    2.30
   6   0  -7    0.60    1.90
   6   0   7    6.20    2.50
  -6   0  -7    6.50    2.90
  -6   0   7    2.40    2.50
  -6   0   7    5.20    2.50
   6   0  -7    4.60    2.00
  -6   0  -7    3.10    4.40
  -6   0  -7    6.40    2.20
  -6   0  -8   19.50    4.10
  -6   0  -8   19.90    3.80
  -6   0   8   18.70    4.10
  -6   0   8   20.00    3.90
  -6   0  -8   17.80    6.10
   6   0  -8   14.40    3.60
   6   0  -8   17.90    3.70
   6   0   8   19.70    3.90
   6   0  -8   16.40    3.30
  -6   0  -9    4.80    2.60
   6   0   9    4.00    2.80
  -6   0   9    2.80    2.70
   6   0  -9    2.40    2.30
  -6   0  -9    7.60    4.40
   6   0  -9    4.20    2.90
  -6   0  -9    7.70    3.40
   6   0  -9    3.50    2.20
  -6   0   9    8.40    3.30
  -6   0 -10   26.20    5.30
  -6   0 -10   25.40    7.50
  -6   0  10   17.80    4.20
   6   0 -10   23.00    4.80
   6   0  10   12.00    3.60
   6   0 -10   19.50    4.40
  -6   0 -10   13.50    3.80
  -6   0 -11    3.90    2.90
   6   0 -11    1.50    3.10
   6   0  11    0.70    2.70
  -6   0 -11    4.00    3.50
  -6   0 -11    3.10    3.60
   6   0 -11    1.40    2.70
   6   0 -12    8.50    4.10
  -6   0 -12    2.80    3.90
  -6   0 -12    8.80    3.80
   6   0  12    2.40    3.20
  -6   0 -12   13.90    5.20
  -6   0 -13   11.20    4.30
  -6   0 -13    6.00    4.40
   6   0 -13   11.30    4.60
   6   0  13   11.00    4.40
  -6   0 -13   24.50    6.20
   7   0   0   -0.50    1.20
  -7   0   0    0.50    1.50
  -7   0   0   -0.10    1.70
   7   0   0   -2.80    1.40
   7   0   0    2.70    1.70
  -7   0   0   -1.50    3.00
  -7   0  -1    2.90    2.00
   7   0   1    7.60    2.20
   7   0  -1    7.10    2.00
   7   0  -1    6.30    1.80
  -7   0  -1    6.70    1.60
  -7   0   1    7.30    2.00
  -7   0   1    7.10    2.00
  -7   0   1   11.30    4.40
   7   0  -1    6.10    1.70
   7   0   1    8.80    1.90
   7   0   1    6.00    1.80
  -7   0  -1   10.20    4.50
   7   0   2   37.40    3.60
  -7   0   2   26.40    3.50
  -7   0  -2   38.40    4.10
  -7   0   2   28.10    3.60
   7   0  -2   34.80    3.60
  -7   0  -2   33.00    3.40
   7   0   2   33.30    3.30
  -7   0  -2   28.60    6.90
   7   0   2   30.30    3.80
   7   0  -2   36.50    4.10
   7   0   3   40.10    4.00
  -7   0  -3   38.60    8.20
   7   0  -3   40.90    3.80
  -7   0  -3   47.40    4.00
   7   0   3   33.70    3.50
  -7   0   3   45.40    4.20
  -7   0   3   36.70    4.00
  -7   0  -3   35.70    4.40
   7   0  -3   39.10    4.10
   7   0  -3   31.80    4.00
   7   0  -3   30.10    4.00
   7   0  -4    6.10    2.10
   7   0  -4    6.00    2.10
   7   0   4    5.80    1.50
  -7   0  -4    6.80    5.80
   7   0  -4    2.70    2.00
  -7   0   4    3.10    1.80
  -7   0   4    6.30    2.20
  -7   0  -4    4.30    2.40
   7   0  -4    3.20    1.50
   7   0   4    4.30    1.90
  -7   0  -4    5.90    1.80
  -7   0  -5    3.30    1.80
  -7   0   5    5.60    2.30
   7   0  -5    0.90    1.80
   7   0  -5    3.10    2.00
  -7   0   5    3.70    1.90
   7   0  -5    4.80    1.90
   7   0  -5   -1.20    1.60
  -7   0   5    4.10    2.00
  -7   0  -5   -2.60    5.60
  -7   0  -5   -0.50    2.30
   7   0   5    0.40    1.70
   7   0   5    1.10    1.10
  -7   0   6   64.49    6.30
   7   0  -6   64.29    6.20
   7   0  -6   64.09    5.90
   7   0   6   62.79    5.30
   7   0  -6   68.99    6.30
  -7   0  -6   75.99   11.20
  -7   0   6   75.89    6.70
  -7   0   6   65.19    5.50
  -7   0  -6   65.89    6.80
   7   0   6   73.99    6.50
   7   0  -6   67.69    6.30
  -7   0  -6   61.69    6.20
  -7   0   7  101.49    8.60
   7   0   7  118.09    9.10
   7   0  -7   94.89    8.70
   7   0  -7  101.19    7.90
  -7   0  -7  100.99   12.30
  -7   0  -7  104.99    9.20
  -7   0  -7   97.99    8.70
   7   0  -7   98.89    8.40
   7   0  -7   97.69    8.60
  -7   0   7   96.99    8.90
  -7   0  -8   14.00    5.60
  -7   0   8   13.90    3.60
  -7   0  -8   11.90    3.10
   7   0   8   12.60    3.40
  -7   0   8   18.00    3.60
   7   0  -8   11.10    3.10
  -7   0  -8    8.70    3.60
   7   0  -8   13.90    3.40
   7   0  -8    8.40    2.80
  -7   0  -9    5.00    2.80
   7   0  -9    6.60    3.10
   7   0  -9    5.70    2.90
  -7   0  -9   10.80    5.00
   7   0   9    1.00    2.50
  -7   0   9    8.30    4.90
  -7   0   9    4.00    3.10
   7   0  -9    1.90    2.30
  -7   0  -9   -1.30    2.40
   7   0 -10    8.20    3.40
   7   0  10    5.10    3.10
   7   0 -10    9.80    3.20
  -7   0 -10    9.20    3.40
  -7   0 -10    6.30    3.80
  -7   0 -10    8.60    4.90
  -7   0 -11    9.00    4.50
   7   0  11   -2.00    2.50
  -7   0 -11   -0.60    2.50
   7   0 -11    4.20    3.40
  -7   0 -11    1.90    3.30
  -7   0 -12   -5.40    3.40
   7   0 -12   -0.10    3.30
   7   0  12   -0.60    3.10
  -7   0 -12    0.50    3.00
  -7   0 -12    7.50    3.70
  -8   0   0    2.70    2.00
  -8   0   0    5.90    4.60
   8   0   0    2.50    1.50
   8   0   0    4.40    1.90
   8   0   0    6.50    2.10
  -8   0  -1    1.50    2.10
  -8   0   1    0.80    3.30
   8   0   1    2.80    1.70
  -8   0   1    0.10    1.80
   8   0   1    1.00    2.00
   8   0   1    3.10    1.80
  -8   0   1    1.40    1.80
  -8   0  -1    4.40    1.70
   8   0  -1    4.10    1.90
   8   0  -1    0.70    1.50
  -8   0  -1    4.70    4.80
   8   0  -1    1.60    1.90
   8   0   2   31.70    3.60
  -8   0  -2   30.20    4.10
   8   0  -2   31.70    4.10
  -8   0  -2   22.80    6.70
   8   0  -2   28.60    3.70
   8   0   2   27.20    3.50
  -8   0  -2   29.50    3.40
  -8   0   2   24.50    3.50
   8   0  -2   25.00    3.30
  -8   0   2   29.40    3.70
   8   0   2   26.40    3.90
  -8   0   2   24.90    6.50
  -8   0   3   11.60    2.40
  -8   0   3    4.10    2.30
   8   0  -3    6.20    2.30
   8   0   3   13.20    2.50
   8   0   3   10.10    3.00
  -8   0  -3    9.90    2.90
   8   0  -3    9.90    2.50
  -8   0  -3   10.10    2.20
  -8   0  -3   11.30    6.20
   8   0   4   23.30    3.50
  -8   0   4   22.80    3.60
  -8   0  -4   28.90    7.80
  -8   0   4   23.30    3.70
   8   0  -4   25.80    3.40
   8   0  -4   19.60    3.40
  -8   0  -4   19.90    3.80
   8   0   4   21.50    3.00
   8   0  -4   25.10    3.70
  -8   0  -4   22.40    3.30
   8   0  -5    3.60    2.20
  -8   0   5    1.80    2.30
   8   0   5    4.70    1.60
  -8   0   5    3.70    2.10
  -8   0  -5    5.30    2.80
   8   0  -5    5.10    2.10
  -8   0   5    5.30    2.30
  -8   0  -5    5.00    2.10
  -8   0  -5    1.20    6.40
   8   0  -5    6.10    2.60
   8   0   5    2.80    2.20
  -8   0   6   55.79    6.80
   8   0  -6   60.69    6.00
   8   0  -6   62.49    6.80
   8   0  -6   56.09    5.90
  -8   0  -6   75.99   12.40
  -8   0   6   55.69    6.10
  -8   0  -6   67.69    6.80
  -8   0   6   64.89    6.70
  -8   0  -6   56.19    5.90
   8   0   6   65.49    6.90
   8   0  -7    4.80    2.50
  -8   0   7    4.60    2.70
  -8   0  -7    8.10    2.50
  -8   0  -7   11.00    3.60
   8   0   7    6.20    2.60
   8   0  -7    4.40    3.20
   8   0  -7    7.90    2.70
  -8   0  -7    2.80    5.50
  -8   0  -8   52.89    7.10
  -8   0   8   43.50    6.40
   8   0   8   41.30    6.00
   8   0  -8   36.60    5.40
  -8   0  -8   51.09    6.30
  -8   0  -8   48.30    9.60
   8   0  -8   52.69    6.60
   8   0  -9   12.50    3.40
   8   0   9   10.70    3.60
   8   0  -9   15.50    3.90
  -8   0  -9   16.10    4.00
  -8   0  -9   15.10    4.40
  -8   0   9   16.40    4.60
  -8   0  -9   17.70    6.40
  -8   0 -10    9.70    5.10
  -8   0 -10    0.20    3.30
   8   0  10    3.00    3.10
   8   0 -10    2.30    2.70
   8   0 -10    8.70    3.60
   8   0 -11   20.70    4.90
   8   0  11    8.00    3.70
  -8   0 -11   25.10    6.90
  -8   0 -11   15.80    5.40
  -8   0 -12   24.10    7.10
   8   0  12   16.90    4.90
   8   0 -12   17.80    5.10
  -8   0 -12    3.20    4.20
  -9   0   0   -0.90    4.30
   9   0   0   -2.20    1.90
  -9   0   0    1.60    2.20
   9   0   0    0.60    1.70
   9   0   0    1.80    2.00
  -9   0   1   12.10    5.20
   9   0   1    8.80    2.60
   9   0  -1    4.20    2.10
  -9   0  -1    6.30    2.90
   9   0   1    6.50    2.40
   9   0  -1   11.60    2.80
  -9   0   1    3.70    2.30
  -9   0  -1    3.70    2.00
  -9   0  -1    5.90    5.40
  -9   0   1    6.60    2.50
   9   0  -1    7.90    2.10
   9   0   1    2.60    1.70
   9   0   2  195.18   14.70
  -9   0   2  191.98   17.90
   9   0   2  229.28   14.50
  -9   0  -2  207.78   19.40
   9   0  -2  198.98   14.70
  -9   0   2  209.58   14.50
   9   0  -2  211.18   14.30
  -9   0  -2  209.58   14.30
   9   0  -2  210.98   14.50
   9   0   2  199.08   14.40
  -9   0  -2  210.48   14.90
  -9   0   2  209.48   14.50
  -9   0  -3    2.20    2.70
  -9   0  -3    2.60    1.80
   9   0  -3    2.10    1.60
   9   0   3    1.10    1.50
   9   0  -3    0.80    2.20
   9   0   3    2.30    2.70
   9   0   3    2.20    2.00
   9   0  -3    2.10    1.90
  -9   0   3   -2.30    2.10
  -9   0  -3    3.00    6.40
  -9   0   3    0.90    1.70
  -9   0  -4   21.80    3.40
   9   0   4   20.90    3.60
   9   0   4   20.10    4.20
  -9   0   4   20.80    3.50
   9   0  -4   23.20    3.80
   9   0  -4   14.90    3.40
   9   0   4   13.10    2.70
  -9   0  -4   26.10    4.50
  -9   0  -4   13.40    8.10
   9   0   5   76.89    6.30
   9   0   5   74.49    7.00
  -9   0  -5   72.19    6.80
  -9   0  -5   84.09   13.40
  -9   0  -5   94.29    8.10
   9   0  -5   80.39    7.00
   9   0  -5   69.99    7.00
  -9   0   5   73.49    7.00
   9   0  -6   43.40    5.70
  -9   0  -6   48.10    5.80
  -9   0  -6   51.69    6.50
  -9   0  -6   50.59   11.00
   9   0   6   66.99    6.30
   9   0  -6   50.19    6.10
  -9   0   6   54.39    6.00
  -9   0   7   66.29    7.50
   9   0  -7   86.59    8.00
  -9   0  -7   83.09    8.20
   9   0   7   83.29    7.80
   9   0  -7   88.69    7.80
  -9   0  -7   84.09   13.50
  -9   0  -8    8.90    5.80
  -9   0   8   10.60    3.50
   9   0  -8   13.80    3.80
  -9   0  -8    8.00    3.70
   9   0   8    8.30    3.30
   9   0  -8   10.10    3.20
   9   0  -9    4.40    2.90
   9   0   9    6.40    3.10
  -9   0   9    0.20    2.70
  -9   0  -9    1.40    4.40
   9   0  -9    2.90    2.70
  -9   0  -9    0.10    3.30
  -9   0 -10   -4.80    2.90
   9   0 -10    7.40    3.30
   9   0 -10   -1.00    2.60
  -9   0 -10    7.50    4.20
   9   0  10    6.90    3.60
  -9   0 -11    7.20    4.70
   9   0  11    1.80    3.50
   9   0 -11   13.80    4.40
  -9   0 -11   19.20    6.30
  -9   0 -12   -1.30    4.20
   9   0  12    5.50    4.10
   9   0 -12    3.20    3.80
  -9   0 -12   28.80    6.20
  10   0   0   26.20    4.00
 -10   0   0   20.20    3.80
 -10   0   0   17.80    7.00
  10   0   0   21.70    3.50
  10   0  -1   50.99    5.40
  10   0   1   53.69    5.80
 -10   0   1   44.10    5.10
  10   0   1   53.69    5.10
 -10   0  -1   41.90    5.70
 -10   0   1   53.29    9.50
 -10   0  -1   55.09   10.60
  10   0  -1   48.20    5.70
  10   0   2    4.90    2.00
 -10   0   2    3.80    2.00
 -10   0   2   -1.00    4.60
 -10   0  -2    1.40    5.70
  10   0   2    6.10    2.30
 -10   0  -2    3.80    3.00
  10   0  -2    2.50    2.50
  10   0  -2    3.10    2.10
 -10   0  -3   55.89   11.70
 -10   0   3   36.50    8.50
  10   0  -3   41.40    5.20
 -10   0  -3   46.90    5.80
  10   0   3   40.60    5.00
  10   0   3   47.60    5.20
  10   0  -3   45.40    5.60
 -10   0   3   46.40    5.40
  10   0  -4  182.08   14.10
 -10   0   4  191.48   13.90
  10   0   4  180.78   13.70
 -10   0  -4  209.88   20.40
  10   0  -4  202.58   13.90
 -10   0  -4  185.88   14.20
  10   0   4  177.68   13.30
  10   0   5   81.39    7.30
 -10   0  -5   96.09    8.80
  10   0  -5   94.79    8.40
 -10   0   5   88.99    8.10
  10   0   5   94.19    8.20
  10   0  -5  106.39    8.40
 -10   0  -5   94.69   15.00
  10   0   6    1.10    2.30
 -10   0  -6    7.00    6.70
  10   0  -6    0.50    2.50
 -10   0   6   -1.30    2.10
  10   0  -6   -0.10    2.40
 -10   0  -6    3.00    3.20
 -10   0  -7   14.60    7.80
  10   0  -7   13.50    3.70
 -10   0  -7   15.10    4.30
 -10   0   7   17.10    3.90
  10   0  -7   18.50    4.00
  10   0   7   14.80    3.60
 -10   0  -8    0.20    3.40
  10   0  -8    4.30    3.10
 -10   0  -8    5.10    6.10
 -10   0   8    1.50    2.70
  10   0   8   -2.10    2.30
  10   0  -8    0.90    2.80
  10   0   9    8.00    3.50
  10   0  -9    6.30    3.60
 -10   0   9    7.10    3.70
  10   0  -9    7.60    3.70
 -10   0  -9   17.80    6.80
 -10   0  -9    3.40    3.80
 -10   0 -10    0.60    3.80
  10   0 -10    3.60    3.40
 -10   0 -10    9.10    5.50
  10   0 -10   -0.20    2.60
  10   0  10    2.70    3.40
 -10   0 -11   18.10    6.20
  10   0  11   17.00    5.20
 -10   0 -11    3.70    4.40
  10   0 -11   21.80    5.60
  11   0   0    2.80    2.50
 -11   0   0   -1.20    2.20
 -11   0   0   -0.60    5.80
  11   0   0   -0.30    1.80
  11   0  -1   32.20    4.90
 -11   0   1   41.60    9.50
  11   0   1   37.80    4.60
 -11   0  -1   24.30    8.40
  11   0   1   44.60    5.40
  11   0  -1   33.10    4.70
 -11   0   1   35.40    4.80
 -11   0  -1   31.60    5.00
  11   0   2   50.19    5.30
 -11   0   2   44.70    5.20
  11   0  -2   44.20    6.10
 -11   0  -2   54.29    6.50
  11   0  -2   54.09    6.00
  11   0   2   55.09    6.20
 -11   0  -2   56.79   12.00
 -11   0   2   51.39   10.30
  11   0  -3  175.58   13.40
 -11   0  -3  152.18   13.20
 -11   0   3  186.38   13.00
 -11   0  -3  175.88   19.30
 -11   0   3  169.78   17.30
  11   0   3  174.08   12.80
  11   0   3  182.28   12.90
  11   0  -3  177.68   13.00
 -11   0   4   19.60    7.40
  11   0   4   22.60    3.60
  11   0  -4   21.70    4.20
 -11   0  -4   28.50    4.80
  11   0   4   24.40    4.00
 -11   0  -4   13.50    9.00
  11   0  -4   22.70    4.00
 -11   0   4   25.60    4.20
 -11   0  -5   35.50   10.10
 -11   0  -5   25.70    5.20
  11   0   5   28.20    4.60
  11   0   5   33.80    4.40
  11   0  -5   38.70    5.90
 -11   0   5   28.90    4.70
  11   0  -5   36.50    5.00
 -11   0  -6   22.90    4.90
  11   0   6   25.90    4.40
 -11   0  -6   21.50    9.20
  11   0  -6   23.30    4.20
 -11   0   6   17.20    3.80
  11   0  -6   16.40    4.20
 -11   0  -7    5.60    7.20
  11   0  -7    8.10    3.70
 -11   0  -7    8.00    4.00
  11   0  -7   11.70    3.70
  11   0   7   11.80    3.60
 -11   0   7    1.90    2.80
 -11   0   8    8.70    3.70
  11   0  -8   21.70    4.50
 -11   0  -8    9.80    4.40
  11   0  -8   11.20    4.10
  11   0   8    9.30    3.70
 -11   0  -8   12.50    6.80
  11   0   9   28.70    5.70
 -11   0  -9   31.50    6.50
  11   0  -9   27.40    5.70
 -11   0  -9   40.50    9.90
  11   0  -9   44.70    6.60
 -11   0   9   34.10    6.10
  11   0 -10    4.40    3.80
  11   0  10    1.50    3.50
  11   0 -10    9.30    4.40
 -11   0 -10    5.70    4.70
 -11   0 -10   20.70    7.20
  12   0   0   18.20    3.50
  12   0   0   14.70    3.40
 -12   0   0   19.70    7.80
 -12   0   0   18.00    3.60
 -12   0   1    4.40    6.00
  12   0   1    8.30    2.80
 -12   0   1    8.80    2.80
  12   0  -1    9.30    2.90
 -12   0  -1    7.90    7.30
 -12   0  -1   13.40    3.50
  12   0  -1   10.90    3.30
  12   0   1    6.90    2.60
 -12   0   2   60.39    5.90
 -12   0  -2   53.29   12.20
 -12   0   2   59.69   11.40
 -12   0  -2   48.30    6.60
  12   0   2   56.39    5.90
  12   0   2   59.79    6.00
  12   0  -2   46.30    6.30
  12   0  -2   61.09    6.20
  12   0  -3    5.40    3.00
  12   0  -3    2.80    2.90
 -12   0  -3    6.40    7.90
 -12   0   3   11.40    6.60
 -12   0  -3    3.20    3.30
  12   0   3    4.80    2.60
 -12   0   3    9.80    2.80
  12   0   3    8.80    2.70
 -12   0  -4    7.80    8.30
  12   0  -4   -0.80    2.50
 -12   0   4    0.30    2.10
 -12   0  -4    0.10    2.90
  12   0  -4   -1.10    2.80
 -12   0   4    1.60    5.50
  12   0   4   -3.40    1.90
  12   0   4   -0.80    2.00
  12   0   5   13.90    3.50
 -12   0  -5   12.20    8.30
  12   0  -5   12.80    3.70
 -12   0   5   12.70    3.40
 -12   0   5   12.70    6.80
 -12   0  -5   17.90    4.50
  12   0  -5   11.30    3.70
  12   0  -6    9.20    3.40
  12   0  -6    1.90    3.00
 -12   0   6    8.20    3.10
  12   0   6    5.40    3.00
 -12   0  -6    6.80    3.90
 -12   0  -6    2.50    8.00
 -12   0   7    1.20    2.60
  12   0  -7    3.70    3.00
 -12   0  -7    3.60    3.50
  12   0  -7    2.90    3.50
 -12   0  -7   -6.30    6.70
  12   0   7    6.30    3.40
  12   0  -8    1.00    3.40
 -12   0  -8    1.90    3.70
 -12   0   8   -0.90    2.90
 -12   0  -8    4.60    5.90
  12   0   8    0.50    3.00
  12   0  -8   -2.40    2.80
 -12   0   9    6.10    3.70
  12   0   9    5.90    3.60
 -12   0  -9   14.10    5.10
 -12   0  -9   15.20    7.80
  12   0  -9    8.40    4.00
  12   0 -10   12.00    4.60
 -12   0 -10    5.20    4.90
  12   0  10   11.80    4.60
  12   0 -10    9.40    4.50
 -12   0 -10   20.30    7.30
 -13   0   0    2.20    6.40
  13   0   0   -4.20    2.30
 -13   0   0    1.70    2.20
  13   0   0    1.60    2.40
  13   0  -1   13.70    3.90
  13   0   1   23.90    3.90
 -13   0   1    7.20    7.70
 -13   0  -1   18.00    8.90
  13   0  -1   15.70    3.70
 -13   0  -1   12.80    3.80
 -13   0   1   11.20    3.10
  13   0   1   17.40    3.90
  13   0  -2   32.80    5.20
 -13   0  -2   28.20   10.20
  13   0   2   26.20    4.20
  13   0  -2   30.60    4.70
  13   0   2   30.80    4.80
 -13   0   2   30.50    4.40
 -13   0  -2   22.90    4.90
 -13   0   2   32.50    9.80
 -13   0  -3   17.30    9.10
 -13   0   3   12.40    8.20
  13   0  -3   30.00    5.10
  13   0  -3   18.70    4.30
 -13   0   3   22.80    4.10
  13   0   3   19.40    4.20
 -13   0  -3   18.30    4.80
  13   0   3   23.10    4.10
 -13   0  -4   -4.00    7.30
 -13   0   4   -0.30    1.80
  13   0   4    0.20    2.40
  13   0   4   -1.90    2.10
  13   0  -4    5.50    3.30
  13   0  -4   -1.20    2.30
 -13   0  -4    7.00    3.60
 -13   0   4    3.30    6.60
 -13   0   5   -0.70    1.90
 -13   0   5    3.10    5.50
 -13   0  -5    2.70    3.50
  13   0  -5   -1.80    2.70
  13   0  -5   -1.50    2.60
  13   0   5    0.80    2.70
 -13   0  -5    4.00    8.40
  13   0   6   10.60    3.60
 -13   0  -6    3.90    8.50
  13   0  -6    4.40    3.30
 -13   0   6    3.40    2.80
  13   0  -6    9.30    3.60
 -13   0   6    7.10    6.00
 -13   0  -6    2.00    3.70
  13   0   7   18.00    4.60
 -13   0   7   22.60    4.80
  13   0  -7   23.00    4.90
 -13   0  -7   20.60    5.40
  13   0  -7   21.10    5.50
 -13   0  -7   18.40    9.10
  13   0  -8   94.19   10.90
 -13   0  -8   91.19    9.80
  13   0   8   89.59    9.20
 -13   0  -8  112.29   17.80
  13   0  -8   84.69    9.30
 -13   0   8   92.39    9.30
  13   0  -9  105.39   10.20
 -13   0  -9   89.59   11.30
  13   0   9  107.19   10.40
 -13   0   9   93.59   10.20
 -13   0  -9   91.89   16.60
  13   0  -9  105.99   11.30
  14   0   0  135.19   11.00
  14   0   0  149.99   12.10
 -14   0   0  148.39   18.80
 -14   0   0  144.39   11.40
 -14   0  -1   61.79    6.40
 -14   0   1   53.09   12.40
  14   0  -1   54.79    6.10
  14   0   1   48.90    6.60
  14   0   1   44.90    5.70
  14   0  -1   40.70    6.40
 -14   0   1   49.10    6.00
 -14   0  -1   47.50   11.90
 -14   0  -2    5.60    3.00
 -14   0  -2   -7.90    7.10
 -14   0   2   -0.40    7.20
  14   0   2   -1.90    2.50
  14   0   2   -1.50    2.20
 -14   0   2    5.40    2.50
  14   0  -2   -0.60    2.60
  14   0  -2   -0.70    2.90
  14   0   3   -1.00    2.60
  14   0   3    0.80    2.60
 -14   0  -3    3.20    3.20
  14   0  -3    2.30    3.00
 -14   0  -3   -2.80    7.00
 -14   0   3    3.70    2.40
 -14   0   3   -2.50    6.60
  14   0  -3    4.60    3.20
  14   0   4   -3.60    2.30
 -14   0  -4    4.00    9.20
 -14   0   4    2.90    2.30
 -14   0  -4   -0.80    3.10
 -14   0   4   10.80    8.00
  14   0  -4   -0.10    2.80
  14   0  -4    3.10    3.30
  14   0   4    1.00    2.60
  14   0   5   16.90    4.00
 -14   0   5   23.50    8.90
 -14   0  -5   13.30    4.60
 -14   0  -5   19.10   10.50
  14   0  -5   12.60    4.30
 -14   0   5   12.20    3.40
  14   0  -5   17.80    4.30
  14   0   6   -0.10    2.90
 -14   0   6    7.50    7.50
 -14   0  -6    1.70    3.80
  14   0  -6    1.60    3.10
 -14   0  -6   -8.30    7.70
 -14   0   6    3.90    2.60
  14   0  -6   -1.30    3.60
  14   0  -7   12.70    4.60
 -14   0  -7    5.40    4.30
 -14   0   7   13.70    7.60
 -14   0  -7   15.70    9.80
 -14   0   7   16.10    4.00
  14   0   7    2.80    3.40
  14   0  -7    7.70    3.90
  14   0   8   43.20    6.90
 -14   0  -8   56.79    8.50
 -14   0  -8   56.79   13.60
 -14   0   8   53.79    7.50
  14   0  -8   59.39    7.80
  14   0  -8   51.39    8.30
 -15   0   0    2.10    8.10
  15   0   0   -5.70    2.30
  15   0   0   -0.80    2.70
 -15   0  -1   12.00    8.90
  15   0   1   13.90    3.70
  15   0   1   14.40    4.30
  15   0  -1   13.50    3.80
 -15   0   1    9.90    8.30
 -15   0   1   19.10    3.60
 -15   0  -1   17.80    4.20
  15   0  -1   18.30    4.90
  15   0   2   -1.40    2.60
 -15   0  -2    3.10    8.40
 -15   0   2   -4.70    6.90
  15   0   2    3.30    2.70
  15   0  -2    3.60    3.20
 -15   0   2    3.70    2.30
 -15   0  -2    1.40    2.70
 -15   0  -3   -0.50    2.80
 -15   0   3   -0.90    7.50
  15   0   3   -2.00    2.50
 -15   0   3    2.10    2.30
 -15   0  -3   -6.20    8.10
  15   0   3   -2.30    2.40
  15   0  -3    1.70    3.00
  15   0  -3   -0.40    3.20
 -15   0   4    1.00    7.00
  15   0  -4    4.00    3.40
  15   0   4    2.70    2.70
  15   0  -4    3.20    3.90
 -15   0  -4    2.10    3.50
 -15   0  -4   -7.10    8.50
 -15   0   4    2.40    2.40
 -15   0   5    3.20    2.50
 -15   0   5    0.10    7.50
  15   0  -5    2.00    3.80
 -15   0  -5   -5.20    8.50
  15   0   5    2.00    2.80
 -15   0  -5    2.50    3.70
  15   0  -5    6.90    3.60
 -15   0  -6   -4.00    8.70
 -15   0  -6    3.90    4.00
  15   0  -6   -5.60    3.00
 -15   0   6   -2.90    2.70
  15   0   6    0.90    3.20
  15   0  -6    1.70    3.60
 -15   0   6   -0.10    7.50
  15   0  -7   17.20    4.70
 -15   0  -7   13.10   11.20
  15   0  -7    7.20    4.50
  15   0   7    7.50    3.80
 -15   0   7   10.20    3.70
 -15   0  -7    7.50    4.70
 -15   0   7   14.30    9.40
 -16   0   0    7.10    9.80
  16   0   0    0.10    3.30
 -16   0  -1    3.30   10.00
  16   0  -1    3.40    3.70
 -16   0   1    0.70    9.00
  16   0   1    6.00    4.00
  16   0   2    6.50    3.70
  16   0  -2    6.00    3.70
 -16   0   2    6.10    8.20
 -16   0  -2    9.20   10.10
 -16   0  -3    9.30   11.00
  16   0   3    1.00    2.90
  16   0   3   -1.50    3.10
 -16   0   3   -0.80    7.70
 -16   0  -3    5.80    3.60
  16   0  -3    3.10    3.50
  16   0  -4   -1.20    3.30
 -16   0   4   -3.30    8.70
 -16   0  -4    3.80    3.50
 -16   0  -4   -0.80    9.00
  16   0   4    0.20    2.90
 -16   0  -5   10.30    4.60
 -16   0  -5   -6.70    8.30
  16   0  -5    2.30    3.80
 -16   0   5    5.10    9.40
  16   0   5   13.60    3.90
  17   0   0    3.40    4.10
 -17   0   0   -1.10    8.40
  17   0   1   -0.10    4.00
 -17   0   1   -6.60    9.90
 -17   0  -1   -2.20   10.40
  17   0  -1   -4.20    3.20
  17   0  -2    4.80    3.80
  17   0   2    3.10    4.00
 -17   0  -2   -4.20    9.60
 -17   0   2   14.00   11.80
 -17   0   3   18.20   11.70
  17   0   3    4.50    3.90
  17   0  -3    8.20    4.70
 -17   0  -3    3.60   11.40
   0   1   0    1.00    0.30
   0   1   0    1.10    0.30
   0  -1   0    0.00    0.10
   0   1   0    0.00    0.10
   0  -1   0    1.00    0.30
   0  -1   0    0.30    0.10
   0   1  -1  144.99    9.30
   0  -1  -1  149.39    9.40
   0  -1  -1  140.09    9.30
   0  -1   1  148.99    9.10
   0   1  -1  142.49    9.30
   0   1   1  153.18    9.50
   0  -1  -1  143.69    9.30
   0   1   1  149.19    9.40
   0   1   1  142.09    9.30
   0  -1   1  141.89    9.30
   0   1   2 1554.74   95.09
   0  -1  -2 1481.15   95.09
   0   1  -2 1541.85   95.89
   0   1  -2 1500.95   95.09
   0  -1   2 1600.84   94.79
   0   1  -2 1549.94   94.89
   0   1  -2 1550.04   95.09
   0  -1  -2 1496.75   95.59
   0  -1  -2 1557.34   95.09
   0  -1   2 1478.95   94.99
   0   1   2 1548.84   95.19
   0   1  -3 1740.03  104.99
   0   1   3 1642.34  104.99
   0   1  -3 1658.73  105.99
   0   1   3 1677.93  104.79
   0   1  -3 1753.32  104.29
   0  -1  -3 1610.34  104.89
   0  -1  -3 1708.63  104.89
   0  -1   3 1697.83  104.79
   0  -1  -3 1695.33  105.69
   0  -1  -4   12.60    2.70
   0   1  -4   11.20    2.00
   0   1  -4    8.90    1.80
   0   1   4   10.50    2.00
   0   1  -4    9.10    2.60
   0  -1  -4   13.80    2.00
   0  -1   4    9.90    1.80
   0   1   4   13.00    2.00
   0   1  -5   41.00    3.90
   0   1   5   31.80    4.10
   0   1   5   35.50    4.00
   0  -1  -5   33.20    4.10
   0  -1  -5   33.40    3.70
   0  -1   5   40.00    3.80
   0  -1  -5   35.90    2.70
   0  -1  -5   31.30    4.50
   0   1  -5   39.50    2.70
   0   1  -5   43.20    3.80
   0   1  -5   40.20    5.00
   0  -1  -6    3.10    1.90
   0  -1   6    7.70    2.00
   0   1  -6    2.40    1.90
   0   1  -6    2.90    0.80
   0   1  -6    4.80    1.60
   0  -1  -6    2.70    2.20
   0   1   6    2.90    1.50
   0  -1  -6    4.90    1.70
   0  -1  -6    3.30    0.80
   0   1  -6    2.40    2.10
   0  -1  -7   55.59    6.40
   0   1  -7   83.89    8.80
   0   1  -7   81.99    6.80
   0   1  -7   90.79    7.20
   0  -1  -7   61.09    7.80
   0   1  -7   78.69    5.00
   0  -1   7   72.29    6.60
   0  -1  -7   65.59    6.50
   0  -1  -7   74.69    5.10
   0   1   7   69.99    6.40
   0  -1   8  119.79    9.80
   0  -1  -8  115.79    9.90
   0  -1  -8  122.99   12.10
   0   1  -8  127.79   10.20
   0   1  -8  130.59   12.50
   0   1   8  117.99    9.90
   0  -1  -8  131.69   10.30
   0   1  -8  114.49    9.90
   0   1  -9   90.19   11.40
   0   1   9  116.39    9.40
   0   1  -9  103.39    9.70
   0  -1  -9  118.39   12.10
   0   1  -9  100.19    9.30
   0  -1   9   96.79    9.10
   0  -1  -9  115.79    9.70
   0  -1  -9  111.99    9.50
   0  -1  10    7.90    2.90
   0  -1 -10    2.60    3.50
   0   1  10   13.30    3.70
   0  -1 -10    4.60    2.90
   0   1 -10    6.00    2.80
   0   1 -10    4.60    3.10
   0  -1 -10    6.60    2.90
   0   1 -10    7.00    4.10
   0   1  11    7.00    3.30
   0  -1 -11   11.50    4.00
   0  -1 -11    7.40    4.40
   0   1 -11    9.20    4.80
   0  -1  11    6.90    3.40
   0   1 -11   11.80    3.70
   0   1 -11   14.00    4.30
   0  -1 -11    6.20    3.10
   0  -1 -12   -2.10    3.20
   0  -1  12   -0.10    2.70
   0   1 -12   -1.40    3.00
   0   1 -12    0.40    1.90
   0   1 -12   -0.70    3.60
   0  -1 -12    0.40    2.40
   0   1  12    0.40    2.80
   0  -1 -12    1.10    3.00
   0  -1 -13    3.00    3.10
   0   1 -13   -1.30    3.50
   0   1 -13   -3.50    2.10
   0  -1 -13    4.70    4.40
   0   1  13   -0.10    3.00
   0  -1 -13    0.70    3.60
   0  -1  13    5.40    3.40
   0   1 -13   -0.10    3.40
   0   1 -14    9.30    5.40
   0   1  14    8.60    3.70
   0  -1 -14    9.10    5.10
   0  -1 -14    6.80    4.60
   0   1 -14    4.30    4.60
   0  -1 -14   12.70    4.40
   0   1 -14    4.70    3.50
   0  -1  14    2.70    3.10
   1  -1   0  564.64   34.70
  -1   1   0  544.05   34.20
   1   1   0  541.25   34.10
  -1   1   0  541.35   34.50
   1  -1   0  560.44   34.30
  -1   1   0  546.95   34.30
   1   1  -1  122.39    7.30
   1   1  -1  116.09    7.30
  -1  -1  -1  116.09    7.30
   1   1  -1  117.19    7.30
  -1   1   1  111.19    7.50
   1  -1   1  113.29    7.40
  -1  -1  -1  109.79    7.30
   1   1  -1  114.59    7.90
  -1   1   1  110.89    7.40
  -1  -1  -1  112.49    7.80
  -1  -1  -1  108.09    7.30
   1   1   1  107.39    7.30
  -1   1  -1  122.29    8.10
   1  -1  -1  110.29    7.40
   1  -1  -1  107.39    7.40
   1   1   1  109.09    7.30
  -1  -1   1  117.49    7.20
   1   1   1  113.19    7.20
   1   1   1  114.59    7.40
  -1   1  -1  116.09    7.40
  -1  -1  -2 1402.76   87.59
   1   1  -2 1377.16   87.59
  -1   1   2 1372.96   87.69
  -1   1   2 1414.26   87.59
   1   1  -2 1427.86   87.59
   1   1  -2 1452.15   87.39
  -1  -1  -2 1456.15   87.59
   1   1  -2 1448.66   88.59
   1  -1   2 1361.06   87.59
  -1  -1  -2 1437.06   88.19
  -1   1   2 1423.76   87.49
   1   1   2 1466.45   87.49
   1  -1  -2 1349.86   87.69
   1   1   2 1441.76   87.59
  -1   1  -2 1400.06   87.69
  -1   1  -2 1428.96   88.49
  -1  -1   2 1354.66   87.49
   1  -1  -2 1431.86   87.69
   1  -1  -2 1427.56   88.29
  -1   1  -2 1370.86   87.59
   1   1   2 1394.06   87.69
   1  -1   3   52.89    3.90
   1   1  -3   51.49    4.90
   1   1  -3   51.79    3.90
  -1  -1  -3   41.60    3.80
   1  -1   3   48.00    3.00
  -1   1   3   39.70    3.80
   1   1  -3   52.69    3.20
  -1  -1  -3   39.20    3.70
  -1  -1  -3   39.60    4.50
   1   1  -3   50.79    3.80
  -1   1   3   40.90    3.80
   1   1  -3   50.29    3.40
  -1   1  -3   54.49    4.10
  -1   1  -3   51.79    3.90
   1  -1  -3   42.90    4.40
   1  -1  -3   35.50    3.70
   1  -1  -3   39.90    3.70
  -1   1  -3   47.40    5.00
   1   1   3   42.80    3.50
  -1  -1   3   53.19    3.80
   1   1   3   42.60    3.70
   1   1  -4   15.00    3.20
   1   1  -4   20.20    2.40
  -1  -1  -4   10.10    2.60
   1  -1   4   13.00    2.00
  -1   1   4   14.00    2.30
  -1  -1  -4   10.50    1.90
  -1  -1  -4   14.10    2.10
   1   1  -4   17.80    2.40
  -1   1   4   10.20    1.90
   1   1  -4   14.00    1.50
   1  -1  -4   11.60    1.50
  -1   1  -4   15.80    2.40
   1  -1  -4   14.60    2.20
   1  -1  -4   10.00    1.80
   1   1   4   10.10    1.60
  -1   1  -4   15.70    2.20
   1   1   4    9.90    1.80
   1  -1  -4   12.50    2.80
  -1  -1   4   14.60    2.00
  -1   1  -4   18.40    3.60
  -1   1   5   29.00    3.40
   1   1  -5   25.40    3.50
  -1   1   5   25.30    3.40
   1  -1   5   31.10    3.50
   1   1  -5   26.40    2.30
   1   1  -5   29.70    5.00
  -1  -1  -5   25.00    1.80
  -1  -1  -5   23.80    3.30
  -1  -1  -5   27.80    4.70
  -1  -1  -5   26.20    3.30
   1   1  -5   21.10    3.00
   1  -1   5   27.00    2.10
  -1   1  -5   24.20    3.30
   1  -1  -5   29.60    3.50
  -1   1  -5   28.50    3.50
   1  -1  -5   23.80    2.30
   1  -1  -5   23.10    3.20
  -1   1  -5   24.10    4.40
   1  -1  -5   26.40    4.60
   1   1   5   26.10    2.50
   1   1   5   28.10    3.30
  -1  -1   5   24.10    3.00
   1   1  -6   18.60    4.30
   1   1  -6   19.10    1.90
  -1  -1  -6   22.10    3.50
  -1   1   6   15.20    2.80
   1   1  -6   24.40    3.20
   1  -1   6   19.10    1.80
   1  -1   6   17.80    2.90
   1   1  -6   22.20    3.40
  -1   1   6   18.70    3.30
  -1  -1  -6   16.90    4.20
  -1  -1  -6   23.20    3.40
  -1  -1  -6   17.30    1.40
   1  -1  -6   18.60    2.10
   1   1   6   20.40    3.10
   1  -1  -6   23.30    4.80
  -1   1  -6   21.00    4.60
   1  -1  -6   20.20    3.20
  -1  -1   6   20.20    3.10
  -1   1  -6   19.50    3.00
  -1   1  -6   20.00    3.20
   1  -1  -6   18.50    3.20
   1   1   6   16.80    2.40
   1   1  -7  183.28   11.70
   1  -1   7  185.18   13.20
  -1  -1  -7  186.58   15.10
   1   1  -7  169.08   13.10
  -1  -1  -7  179.58   13.20
  -1  -1  -7  167.78   13.30
   1   1  -7  186.48   13.30
   1  -1   7  178.28   11.70
   1   1  -7  153.68   15.00
  -1   1   7  177.28   13.10
   1  -1  -7  183.58   15.20
  -1   1  -7  175.38   15.30
   1  -1  -7  190.58   13.40
   1   1   7  194.38   13.20
   1   1   7  190.88   12.30
  -1   1  -7  169.88   13.10
   1  -1  -7  188.48   11.80
  -1  -1   7  165.08   12.90
  -1   1  -7  170.48   13.20
   1  -1  -7  177.58   13.20
  -1  -1  -8  155.48   13.10
   1   1  -8  193.58   13.30
   1   1  -8  180.58   11.40
   1  -1   8  199.68   13.30
  -1  -1  -8  163.58   13.00
  -1  -1  -8  144.99   14.60
  -1   1   8  156.18   12.80
   1   1  -8  185.98   16.00
   1   1  -8  197.08   13.60
   1  -1  -8  156.78   12.90
   1  -1  -8  164.38   11.40
   1   1   8  150.98   12.70
  -1   1  -8  195.08   13.70
  -1   1  -8  205.18   13.50
   1   1   8  163.18   11.80
   1  -1  -8  153.38   15.00
  -1  -1   8  192.58   13.10
  -1   1  -8  194.08   15.90
   1  -1  -8  157.68   13.10
   1  -1   9  170.38   12.00
  -1  -1  -9  143.89   14.00
   1   1  -9  162.18   12.10
   1   1  -9  155.18   11.80
  -1  -1  -9  129.09   11.50
  -1  -1  -9  129.19   11.90
  -1   1   9  131.29   11.40
   1   1  -9  138.79   14.50
  -1   1  -9  158.08   12.00
   1  -1  -9  125.79   11.40
   1  -1  -9  122.79   13.40
   1   1   9  130.89   11.30
  -1   1  -9  166.28   12.40
   1  -1  -9  134.79   11.90
  -1  -1   9  163.88   11.90
  -1   1  -9  154.98   14.60
   1   1 -10   42.20    8.60
  -1  -1 -10   53.39    6.60
  -1  -1 -10   47.30    8.80
   1   1 -10   35.00    6.00
   1   1 -10   33.20    5.80
  -1  -1 -10   53.39    7.30
   1  -1  10   48.50    6.30
  -1   1  10   54.49    6.80
  -1   1 -10   54.39    7.20
   1  -1 -10   54.09    6.80
  -1   1 -10   37.00    5.70
   1  -1 -10   45.00    9.00
   1   1  10   45.60    6.20
  -1   1 -10   35.10    8.10
  -1  -1  10   41.80    6.00
   1  -1 -10   56.59    7.30
   1  -1  11   12.30    4.10
  -1  -1 -11    9.70    4.70
  -1  -1 -11   11.00    3.60
   1   1 -11   20.70    4.40
   1   1 -11   14.80    4.40
  -1   1  11   12.30    3.50
   1   1 -11   13.80    5.30
  -1  -1 -11   13.30    4.10
   1  -1 -11   15.10    4.30
  -1   1 -11    9.30    3.80
  -1   1 -11   12.80    3.40
   1   1  11   12.30    4.00
  -1   1 -11   15.40    5.80
   1  -1 -11   14.30    5.60
   1  -1 -11   11.10    3.60
  -1  -1  11    9.80    3.20
   1  -1  12    4.50    3.40
  -1  -1 -12    6.30    4.40
   1   1 -12    2.40    2.90
   1   1 -12    1.00    3.70
  -1  -1 -12    3.20    3.70
  -1  -1 -12    1.20    2.70
  -1   1  12    1.30    2.90
   1   1 -12   -0.40    3.20
   1  -1 -12   -0.20    3.20
   1  -1 -12    0.20    2.80
  -1   1 -12    3.90    2.90
   1   1  12    3.60    2.70
   1  -1 -12    4.80    2.90
  -1   1 -12    2.90    3.50
  -1   1 -12   -1.10    3.00
  -1  -1  12    2.90    3.20
  -1  -1 -13   15.70    6.20
   1   1 -13   17.20    7.30
  -1  -1 -13   15.80    5.10
   1  -1  13   11.80    4.50
  -1  -1 -13   12.60    4.10
   1   1 -13   13.60    4.40
  -1   1  13   20.60    5.10
   1   1 -13   10.00    4.70
   1  -1 -13   14.70    4.70
   1   1  13   25.60    5.40
   1  -1 -13   21.30    7.50
  -1   1 -13   15.30    6.70
  -1  -1  13   16.20    4.50
  -1   1 -13   14.40    4.60
  -1   1 -13   15.40    5.30
   1  -1 -13   11.20    4.80
   1   1 -14    5.60    3.90
  -1  -1 -14   -0.50    4.10
  -1  -1 -14   13.40    5.40
   1   1 -14   16.00    7.30
   1  -1  14    3.60    3.50
  -1   1  14    2.80    4.00
   1   1 -14   10.10    5.20
  -1  -1 -14    4.20    3.40
   1  -1 -14    3.70    4.30
  -1  -1  14    7.30    4.00
   1  -1 -14    6.50    3.80
  -1   1 -14    6.40    4.20
  -1   1 -14   14.80    4.80
   1  -1 -14    9.30    4.90
   1   1  14    4.70    3.60
  -1   1 -14    5.60    4.80
  -2  -1   0  222.88   14.50
   2   1   0  223.28   13.50
   2   1   0  211.18   13.80
  -2   1   0  217.68   13.90
  -2   1   0  220.08   14.60
   2  -1   0  215.88   13.90
   2  -1   0  225.58   13.90
  -2  -1   0  220.88   13.50
  -2   1   0  213.18   13.90
   2  -1   0  198.48   13.80
  -2  -1  -1   18.20    2.80
  -2   1   1   18.20    2.00
  -2   1   1   16.30    1.90
  -2  -1  -1   18.30    1.70
   2  -1   1   24.70    2.10
   2   1  -1   27.80    2.00
  -2  -1  -1   22.80    1.70
   2  -1   1   26.00    1.90
   2   1  -1   24.90    1.70
  -2  -1   1   24.40    1.70
   2  -1  -1   17.40    2.00
   2   1   1   21.40    1.70
  -2   1  -1   20.10    2.00
  -2  -1   1   22.60    1.70
   2  -1  -1   18.90    1.80
   2  -1  -1   16.50    1.90
  -2   1  -1   30.60    3.80
   2   1   1   25.30    2.00
   2   1   1   22.70    1.70
  -2   1  -1   22.60    2.00
  -2  -1  -2 1135.09   72.29
  -2   1   2 1112.89   72.59
  -2  -1  -2 1138.59   72.39
  -2  -1  -2 1131.69   73.39
   2   1  -2 1195.48   72.29
   2   1  -2 1244.18   72.29
  -2   1   2 1164.58   72.39
   2  -1   2 1175.08   72.39
  -2   1   2 1118.49   72.29
   2   1  -2 1182.78   72.29
   2  -1  -2 1108.29   72.49
   2  -1  -2 1167.28   72.49
   2   1   2 1178.78   72.39
  -2   1  -2 1114.09   72.39
  -2   1  -2 1149.19   73.69
  -2  -1   2 1219.18   72.39
   2   1   2 1167.88   71.99
  -2   1  -2 1208.48   72.59
  -2  -1   2 1221.28   72.29
   2   1   2 1142.69   72.29
   2   1  -3  111.49    7.50
  -2  -1  -3  101.99    7.40
  -2   1   3  103.39    7.20
  -2   1   3  100.99    7.50
   2   1  -3  111.99    7.40
   2   1  -3  111.09    7.00
   2   1  -3  109.99    8.80
  -2  -1  -3  102.59    7.50
   2   1  -3  111.09    7.20
  -2   1   3  101.39    7.60
  -2  -1  -3   95.99    8.60
   2  -1   3  107.69    7.50
   2   1   3  103.89    7.40
   2  -1  -3  106.59    7.50
  -2   1  -3  112.89    7.70
  -2   1  -3  108.59    7.60
  -2  -1   3  111.89    7.60
  -2   1  -3  107.89    9.10
   2   1   3  102.39    7.30
   2  -1  -3  100.29    7.20
  -2  -1   3  112.39    7.40
   2  -1  -3  103.79    7.60
   2  -1   4   63.89    5.00
   2   1  -4   57.89    4.10
  -2   1   4   54.99    4.70
  -2  -1  -4   52.79    4.70
  -2  -1  -4   55.49    4.80
   2   1  -4   67.69    4.90
  -2  -1  -4   58.79    3.80
  -2   1   4   57.89    5.00
   2   1  -4   62.29    4.80
  -2  -1  -4   53.09    5.90
   2   1  -4   59.49    4.40
   2   1  -4   62.59    6.20
  -2   1   4   56.39    4.30
  -2   1  -4   60.89    5.10
   2  -1  -4   53.89    4.80
   2  -1  -4   58.89    4.90
  -2  -1   4   65.59    4.80
   2   1   4   55.49    4.70
  -2  -1   4   63.69    5.00
  -2   1  -4   64.59    6.50
  -2   1  -4   58.69    4.90
   2  -1  -4   57.19    4.40
   2  -1  -4   58.99    6.00
   2   1   4   56.99    4.40
   2   1  -5  159.48   10.70
  -2   1   5  166.88   11.70
   2  -1   5  165.28   10.50
   2   1  -5  160.28   11.40
  -2  -1  -5  152.08   12.80
   2   1  -5  166.68   13.30
  -2   1   5  161.28   11.40
  -2  -1  -5  151.68   11.40
   2   1  -5  161.68   10.40
   2  -1   5  153.78   11.30
   2   1  -5  156.78   11.40
  -2  -1  -5  169.88   11.50
   2   1   5  163.18   11.30
   2  -1  -5  157.28   11.40
  -2   1  -5  165.88   13.30
   2   1   5  170.98   10.90
  -2   1  -5  160.98   11.50
   2  -1  -5  156.88   12.90
  -2   1  -5  163.68   11.60
   2  -1  -5  158.68   10.70
  -2  -1   5  161.68   11.30
   2  -1  -5  163.48   11.50
   2   1  -6   32.70    5.90
  -2  -1  -6   30.40    5.50
   2   1  -6   32.80    2.40
   2   1  -6   32.60    2.80
  -2   1   6   32.40    4.30
   2   1  -6   24.70    3.50
  -2   1   6   27.40    3.60
  -2  -1  -6   26.50    3.90
  -2  -1  -6   26.10    3.70
   2   1  -6   29.60    3.90
   2  -1   6   30.50    2.50
   2  -1   6   30.60    3.90
  -2   1  -6   31.40    5.80
   2   1   6   26.70    2.80
   2  -1  -6   35.10    4.10
  -2   1  -6   27.90    3.70
  -2   1  -6   37.00    4.40
   2  -1  -6   38.20    4.50
   2  -1  -6   25.50    2.80
   2   1   6   24.10    3.50
  -2  -1   6   38.40    4.10
   2  -1  -6   28.50    5.30
  -2   1   7   61.59    5.70
   2  -1   7   56.29    4.40
   2   1  -7   55.59    5.60
  -2  -1  -7   56.79    7.30
   2   1  -7   58.89    4.20
   2   1  -7   60.59    5.90
  -2  -1  -7   67.89    6.20
   2  -1   7   64.69    6.00
  -2   1   7   67.49    6.30
   2   1  -7   59.79    7.50
  -2  -1  -7   64.09    5.90
   2   1  -7   59.29    4.70
   2   1   7   58.29    4.90
  -2  -1   7   67.09    5.90
   2  -1  -7   64.89    4.80
  -2   1  -7   60.29    7.70
   2  -1  -7   58.39    7.50
   2  -1  -7   58.69    5.80
   2  -1  -7   62.39    6.00
   2   1   7   64.49    5.80
  -2   1  -7   56.89    6.20
  -2   1  -7   62.69    5.90
   2   1  -8   22.40    4.10
  -2  -1  -8   24.30    4.30
   2   1  -8   31.80    4.50
  -2  -1  -8   23.70    4.30
  -2  -1  -8   22.00    5.30
   2   1  -8   28.90    2.80
  -2   1   8   23.90    4.10
   2   1  -8   24.00    6.00
   2  -1   8   28.00    4.20
  -2   1  -8   25.90    4.10
  -2   1  -8   26.00    4.60
   2  -1  -8   28.70    4.40
   2  -1  -8   15.00    4.70
  -2  -1   8   32.50    4.50
   2   1   8   15.80    3.50
   2  -1  -8   26.80    2.90
  -2   1  -8   28.30    6.20
   2  -1  -8   23.30    4.20
   2   1   8   20.60    2.90
  -2  -1  -9   55.69    9.20
  -2  -1  -9   57.79    6.70
   2  -1   9   33.10    5.40
   2   1  -9   28.60    4.90
   2   1  -9   42.80    6.20
  -2  -1  -9   50.39    6.50
   2   1  -9   29.80    7.50
  -2   1   9   50.09    5.80
   2   1   9   62.19    6.70
  -2   1  -9   41.80    6.10
   2  -1  -9   50.29    8.70
   2  -1  -9   55.09    6.40
  -2  -1   9   39.50    5.50
   2  -1  -9   53.79    6.60
  -2   1  -9   36.00    5.40
  -2   1  -9   34.90    7.80
  -2  -1 -10   55.99    7.80
   2   1 -10   77.19    7.80
   2   1 -10   59.89    7.40
   2  -1  10   54.39    6.90
  -2   1  10   64.79    7.50
   2   1 -10   55.69   10.30
  -2  -1 -10   53.59    7.10
  -2  -1 -10   46.70    8.80
  -2   1 -10   66.49    8.30
   2  -1 -10   60.19    7.60
  -2   1 -10   61.79    7.50
   2  -1 -10   68.29   11.10
   2  -1 -10   60.59    7.90
  -2   1 -10   74.99   11.70
   2   1  10   52.29    6.90
  -2  -1  10   52.89    6.70
  -2  -1 -11   42.40    9.00
   2   1 -11   56.29    7.70
  -2  -1 -11   46.70    7.10
   2   1 -11   73.29   12.60
  -2   1  11   46.40    6.80
   2   1 -11   55.79    7.30
  -2  -1 -11   60.59    8.30
   2  -1  11   60.79    7.60
  -2   1 -11   50.29    7.80
   2   1  11   38.50    6.30
   2  -1 -11   36.30    9.00
  -2   1 -11   52.89   10.50
  -2   1 -11   59.69    7.80
   2  -1 -11   59.39    7.80
  -2  -1  11   49.70    6.70
   2  -1 -11   57.69    7.90
  -2  -1 -12    9.60    4.30
  -2   1  12   13.50    3.90
  -2  -1 -12   16.60    5.70
  -2  -1 -12   13.40    4.20
   2   1 -12   18.80    4.70
   2   1 -12   22.30    5.60
   2   1 -12   16.80    6.50
   2  -1  12   18.60    4.50
  -2   1 -12   11.40    4.30
   2   1  12    7.70    3.80
  -2   1 -12   17.70    6.20
   2  -1 -12   10.00    3.70
  -2  -1  12   13.00    3.70
   2  -1 -12   17.70    5.20
  -2   1 -12   13.50    4.30
   2  -1 -12    8.90    5.40
   2   1 -13    2.00    4.60
  -2  -1 -13    7.30    4.70
   2  -1  13   -0.10    3.10
   2   1 -13    6.60    3.20
   2   1 -13    8.90    4.60
  -2  -1 -13    8.90    3.60
  -2   1  13    9.80    4.20
  -2  -1 -13    3.80    3.90
   2  -1 -13    9.40    4.50
   2  -1 -13   14.50    4.60
   2   1  13   10.40    4.10
  -2   1 -13    2.60    3.00
  -2   1 -13    7.50    4.90
  -2   1 -13    7.30    4.70
  -2  -1  13    4.40    3.50
   2   1 -14   15.40    4.90
  -2  -1 -14   19.00    5.20
  -2   1  14    9.10    4.30
  -2  -1 -14   10.40    4.90
   2   1 -14    7.00    4.80
   2  -1 -14   10.00    4.20
  -2   1 -14    9.30    4.50
  -2  -1  14   16.80    5.00
   2  -1 -14    7.80    5.10
   3   1   0   44.10    3.30
   3  -1   0   44.30    3.70
  -3  -1   0   42.40    4.60
  -3   1   0   51.29    3.90
  -3   1   0   48.50    4.80
   3  -1   0   45.30    3.80
  -3  -1   0   46.50    3.40
  -3  -1   0   45.80    3.20
  -3   1   0   50.29    3.80
   3  -1   1  127.79    9.40
   3   1  -1  136.49    9.10
   3  -1   1  134.39    9.60
  -3  -1  -1  143.59    9.10
   3   1  -1  149.49    9.40
   3  -1   1  141.79    9.20
  -3  -1  -1  146.09   10.70
   3  -1   1  132.79    9.30
  -3  -1  -1  139.69    9.20
  -3   1   1  148.59    9.60
  -3   1   1  144.29    9.40
  -3   1  -1  135.19    9.60
   3  -1  -1  153.68    9.40
   3  -1  -1  143.39    9.50
   3  -1  -1  146.79    9.40
   3  -1  -1  143.99    9.40
   3   1   1  151.28    9.30
  -3   1  -1  136.79    9.40
  -3  -1   1  138.59    9.10
  -3   1  -1  125.49   10.80
   3   1   1  142.49    9.10
  -3  -1   1  137.39    9.10
   3  -1   2 1148.49   71.39
  -3   1   2 1217.48   72.09
  -3  -1  -2 1202.88   73.39
   3   1  -2 1101.09   71.59
  -3  -1  -2 1152.38   71.69
  -3   1   2 1180.98   71.79
   3   1  -2 1136.29   71.69
   3  -1   2 1105.09   71.79
   3   1  -2 1095.59   71.59
  -3  -1  -2 1200.08   71.69
   3   1   2 1185.08   71.59
  -3  -1   2 1109.49   71.69
  -3   1  -2 1067.49   71.79
   3  -1  -2 1195.98   71.89
   3  -1  -2 1170.48   71.69
  -3  -1   2 1118.59   71.59
   3   1   2 1207.58   71.89
  -3   1  -2 1115.59   73.49
  -3   1  -2 1057.29   71.89
   3   1   2 1189.98   71.49
   3  -1  -2 1199.78   71.79
   3  -1  -2 1192.88   71.89
   3   1  -3  195.68   11.90
  -3   1   3  160.38   11.80
   3  -1   3  195.28   12.20
  -3   1   3  161.28   12.00
   3   1  -3  192.18   12.00
  -3  -1  -3  166.28   12.00
  -3   1   3  150.28   12.10
   3   1  -3  191.28   11.70
   3  -1   3  188.28   11.40
   3   1  -3  196.38   12.00
  -3  -1  -3  164.78   11.90
  -3  -1   3  176.88   11.40
   3  -1  -3  171.78   12.10
  -3  -1   3  191.78   11.90
   3  -1  -3  178.48   11.80
  -3   1  -3  197.68   12.20
   3   1   3  171.98   11.40
   3   1   3  174.88   11.90
  -3  -1   3  193.28   12.10
   3  -1  -3  166.28   12.10
   3   1   3  173.48   11.90
  -3   1  -3  180.78   14.00
   3  -1  -3  181.58   11.90
  -3   1  -3  187.28   12.20
   3   1  -4   74.79    6.00
  -3   1   4   81.19    6.30
   3   1  -4   92.79    6.40
   3   1  -4   91.99    6.40
  -3  -1  -4   78.99    6.40
  -3  -1  -4   72.49    7.90
   3  -1   4   95.59    6.50
  -3  -1  -4   85.49    6.40
   3  -1   4   76.99    5.40
   3   1  -4   88.69    5.80
  -3   1   4   81.09    6.60
  -3   1   4   80.19    5.90
  -3   1  -4   84.59    6.60
  -3  -1   4   86.79    6.30
  -3   1  -4   86.09    6.50
   3  -1  -4   81.69    6.40
   3  -1  -4   81.49    6.10
  -3  -1   4   82.69    5.50
   3  -1  -4   83.89    6.50
   3   1   4   79.09    6.30
  -3  -1   4   92.99    6.60
  -3   1  -4   97.89    8.60
   3   1   4   75.39    6.00
  -3  -1  -5  511.15   33.60
  -3   1   5  520.55   32.90
   3   1  -5  512.65   33.40
   3   1  -5  540.35   32.60
   3   1  -5  530.15   33.60
  -3  -1  -5  509.05   35.20
  -3   1   5  533.25   33.90
  -3  -1  -5  512.95   33.50
   3   1  -5  530.05   33.00
   3  -1   5  524.75   33.60
  -3   1   5  532.25   33.50
   3  -1  -5  512.25   33.60
   3   1   5  512.75   33.00
   3  -1  -5  529.05   33.70
  -3  -1   5  499.65   33.60
  -3   1  -5  516.95   33.70
   3  -1  -5  515.05   33.00
  -3   1  -5  501.75   35.50
   3   1   5  508.55   33.40
  -3  -1   5  515.75   33.30
  -3   1  -5  529.25   33.70
  -3  -1  -6   45.90    4.60
   3   1  -6   41.80    6.90
   3   1  -6   42.70    4.50
   3   1  -6   48.60    4.00
   3   1  -6   45.20    4.60
  -3   1   6   43.00    4.90
  -3  -1  -6   45.70    7.10
  -3  -1  -6   45.40    4.90
   3   1  -6   47.10    3.60
  -3   1   6   40.60    4.70
   3  -1   6   51.29    4.90
   3   1   6   40.40    4.50
   3  -1  -6   45.60    4.00
   3  -1  -6   47.30    5.30
  -3   1  -6   45.50    4.90
   3  -1  -6   46.70    4.80
  -3  -1   6   51.89    4.70
  -3   1  -6   51.59    7.60
  -3   1  -6   49.99    5.40
   3   1   6   43.80    4.00
   3  -1   7   10.70    2.80
  -3  -1  -7    9.50    3.70
   3   1  -7    9.80    2.50
   3   1  -7    9.90    1.50
   3   1  -7   12.10    2.70
  -3  -1  -7   11.80    3.10
   3   1  -7    9.20    1.90
   3   1  -7    9.30    3.70
  -3   1   7   11.70    2.90
  -3   1   7   15.20    3.20
  -3  -1  -7   12.80    2.80
  -3   1  -7    7.40    3.50
   3  -1  -7   18.00    3.20
   3   1   7    7.90    2.40
  -3   1  -7   11.90    2.90
   3   1   7    9.80    2.00
   3  -1  -7    7.70    1.80
   3  -1  -7    9.90    1.90
  -3  -1   7   12.40    2.90
  -3   1  -7   10.40    3.10
   3  -1  -7   12.20    2.90
   3  -1   8    4.40    2.60
   3   1  -8    9.30    4.40
  -3  -1  -8   10.00    2.70
   3   1  -8   11.30    3.30
  -3  -1  -8    5.50    2.60
  -3   1   8    8.10    3.30
   3   1  -8    7.70    1.90
  -3  -1  -8   11.30    4.30
  -3   1   8    6.90    2.70
   3   1  -8    5.80    2.40
  -3  -1   8    4.10    2.40
   3   1   8    6.00    1.80
  -3   1  -8    7.30    3.70
   3  -1  -8    9.10    1.80
   3   1   8    5.70    2.60
  -3   1  -8    8.30    2.90
   3  -1  -8    4.50    2.20
   3  -1  -8   10.60    2.10
   3  -1  -8    6.40    2.90
  -3   1  -8    6.80    3.10
   3   1  -9   43.30    8.60
  -3  -1  -9   57.59    9.60
  -3  -1  -9   71.99    7.70
  -3  -1  -9   69.09    6.90
   3  -1   9   42.60    6.30
  -3   1   9   60.89    6.20
   3   1  -9   46.20    6.30
   3   1  -9   56.09    7.00
  -3   1  -9   35.60    5.80
  -3  -1   9   45.90    6.10
  -3   1  -9   61.79   10.40
   3  -1  -9   63.59    6.40
   3  -1  -9   64.39    7.20
   3   1   9   69.09    6.60
  -3   1  -9   36.40    6.10
   3  -1  -9   52.09    5.00
   3   1 -10   55.39   10.80
   3   1 -10   72.99    7.40
   3   1 -10   56.09    7.90
   3  -1  10   72.49    8.20
  -3  -1 -10   59.59    7.90
  -3  -1 -10   70.79    9.50
  -3  -1 -10   75.39    8.70
  -3   1  10   62.19    7.50
  -3   1 -10   76.49   10.00
  -3  -1  10   72.09    7.30
   3  -1 -10   68.09    7.50
   3   1  10   60.79    7.60
  -3   1 -10   60.19    7.90
   3  -1 -10   67.79    7.20
  -3   1 -10   74.49    8.80
   3  -1  11    2.30    2.80
   3   1 -11    3.00    3.30
   3   1 -11    4.00    2.50
  -3  -1 -11    4.00    3.30
  -3  -1 -11    6.10    3.10
  -3  -1 -11    3.40    3.60
   3   1 -11    2.60    3.90
  -3   1  11   -1.00    2.70
   3   1  11    2.10    2.60
  -3  -1  11    6.10    3.20
  -3   1 -11    3.60    3.90
  -3   1 -11    2.30    3.20
  -3   1 -11    3.70    2.50
   3  -1 -11    3.10    2.80
   3  -1 -11    2.50    3.10
   3  -1  12   39.00    6.40
  -3  -1 -12   33.40    6.60
  -3  -1 -12   43.00    9.50
  -3  -1 -12   46.40    7.10
  -3   1  12   46.20    6.90
   3   1 -12   34.90    6.90
   3   1 -12   32.00    6.20
  -3   1 -12   34.50    6.50
  -3   1 -12   42.10    9.70
   3   1  12   45.50    6.90
   3  -1 -12   45.20    7.40
  -3  -1  12   31.00    5.80
  -3   1 -12   38.50    7.00
   3  -1 -12   41.10    6.90
   3   1 -13    1.30    4.20
  -3   1  13    2.40    3.20
   3  -1  13   11.00    4.10
   3   1 -13    3.30    3.20
  -3  -1 -13    3.30    3.80
  -3  -1 -13   10.00    3.80
  -3  -1 -13   13.10    5.20
   3   1  13    9.20    4.00
   3  -1 -13    6.20    4.40
  -3   1 -13    7.50    5.00
  -3   1 -13    5.80    3.40
  -3   1 -13    9.00    5.30
  -3  -1  13   10.80    4.20
   3  -1 -13   12.10    4.30
  -4   1   0  869.31   54.59
   4  -1   0  875.81   54.49
   4  -1   0  877.71   54.59
  -4  -1   0  887.91   54.19
   4   1   0  843.42   54.09
  -4   1   0  851.31   55.89
   4   1   0  867.01   54.69
   4  -1   0  898.21   54.39
   4  -1   0  852.51   54.49
  -4   1   0  852.71   54.49
  -4  -1   0  852.31   54.09
  -4  -1   0  859.11   55.89
   4   1   0  928.81   54.49
  -4   1   1  750.62   49.99
   4  -1   1  860.41   49.70
   4   1  -1  860.71   49.90
   4   1  -1  793.72   49.50
  -4  -1  -1  772.82   51.29
   4   1  -1  835.22   49.50
  -4  -1  -1  760.32   49.50
  -4  -1  -1  743.43   49.60
  -4   1   1  771.32   49.80
  -4   1   1  743.73   51.19
   4  -1   1  831.22   49.90
   4  -1   1  805.72   49.99
   4  -1   1  782.72   49.80
   4  -1  -1  765.42   49.80
  -4   1  -1  788.52   49.99
  -4   1  -1  784.22   51.49
  -4  -1   1  820.82   49.50
   4  -1  -1  755.62   49.80
  -4   1  -1  805.42   49.80
   4   1   1  786.32   49.50
   4  -1  -1  761.82   49.90
   4   1   1  829.92   49.70
   4  -1  -1  832.72   49.90
  -4  -1   1  825.72   49.60
   4   1  -2  395.96   24.50
   4  -1   2  390.56   24.70
   4  -1   2  409.26   24.40
  -4   1   2  383.06   24.70
  -4  -1  -2  359.26   26.60
   4   1  -2  402.16   24.70
  -4  -1  -2  386.46   24.50
  -4   1   2  353.56   24.80
   4   1  -2  380.96   24.40
  -4  -1  -2  380.06   24.60
   4  -1  -2  406.36   24.80
   4  -1  -2  377.16   24.70
   4   1   2  391.66   24.40
   4   1   2  371.66   24.40
   4  -1  -2  385.26   24.70
  -4  -1   2  384.26   24.40
   4  -1  -2  367.46   24.70
  -4   1  -2  385.76   24.70
  -4  -1   2  392.96   24.50
  -4   1  -2  377.46   24.80
  -4   1  -2  415.66   27.30
  -4  -1  -3 1571.54   97.09
  -4  -1  -3 1595.34   99.39
  -4   1   3 1592.84   97.19
   4   1  -3 1563.54   97.09
  -4   1   3 1610.04   97.49
   4  -1   3 1536.45   97.19
   4   1  -3 1542.75   96.99
   4   1  -3 1558.84   96.99
   4  -1   3 1555.84   96.59
  -4  -1  -3 1551.34   97.19
  -4   1   3 1494.15   96.99
  -4   1  -3 1495.25   97.29
   4   1   3 1598.24   97.09
   4  -1  -3 1583.94   97.29
   4  -1  -3 1591.94   97.09
  -4  -1   3 1531.25   96.99
  -4   1  -3 1468.35   99.39
  -4  -1   3 1542.65   97.19
   4  -1  -3 1551.14   97.19
   4  -1  -3 1585.44   97.09
   4   1   3 1630.74   96.69
  -4   1  -3 1545.35   97.19
  -4  -1  -4  400.16   25.40
  -4  -1  -4  408.36   25.40
   4   1  -4  362.66   25.20
   4  -1   4  399.56   24.50
   4   1  -4  364.76   25.20
  -4  -1  -4  395.76   27.50
   4  -1   4  374.06   25.30
  -4   1   4  407.86   25.70
   4   1  -4  362.16   24.80
   4   1  -4  391.96   25.10
  -4   1   4  404.16   25.40
  -4   1   4  398.46   25.00
  -4  -1   4  368.66   25.30
  -4   1  -4  394.66   27.90
  -4  -1   4  352.96   24.50
  -4   1  -4  391.76   25.60
   4   1   4  413.96   25.20
   4  -1  -4  422.16   25.20
   4   1   4  407.96   24.50
  -4  -1   4  369.26   25.10
   4  -1  -4  395.16   25.40
   4  -1  -4  396.06   25.00
  -4   1  -4  377.86   25.40
   4   1   4  398.06   25.30
   4  -1  -4  401.56   25.50
   4   1  -5   36.50    3.80
  -4   1   5   46.10    4.40
   4   1  -5   38.70    4.00
  -4  -1  -5   48.30    6.40
  -4   1   5   39.10    3.40
  -4   1   5   49.60    4.30
   4  -1   5   39.60    4.00
   4   1  -5   38.30    3.30
   4   1  -5   35.30    3.60
  -4  -1  -5   45.00    4.20
   4  -1   5   34.50    2.70
  -4  -1  -5   42.80    4.00
   4  -1  -5   45.30    3.80
   4  -1  -5   43.10    3.60
   4  -1  -5   39.80    4.10
  -4  -1   5   37.30    4.00
   4  -1  -5   46.10    4.20
  -4   1  -5   34.60    4.50
   4   1   5   40.10    4.00
  -4   1  -5   39.80    6.80
   4   1   5   38.20    3.60
  -4  -1   5   27.00    3.70
  -4   1  -5   29.80    3.90
  -4  -1   5   36.50    2.90
   4   1  -6   16.00    2.10
   4   1  -6   13.40    2.70
   4   1  -6   13.40    2.40
  -4  -1  -6   18.20    3.00
  -4  -1  -6   19.10    4.90
   4   1  -6   23.30    3.40
  -4  -1  -6   29.20    4.00
   4  -1   6   10.60    2.70
  -4   1   6   23.70    3.40
  -4   1   6   30.00    3.90
  -4  -1   6   16.00    2.80
   4  -1  -6   23.80    3.50
   4  -1  -6   26.80    3.70
  -4   1  -6   18.20    3.10
  -4  -1   6   13.60    2.90
   4   1   6   22.40    3.10
   4  -1  -6   23.50    2.70
   4   1   6   14.90    2.40
  -4   1  -6   13.30    4.40
  -4   1  -6   15.80    3.30
   4  -1  -6   17.60    2.60
  -4   1   7   28.20    4.50
  -4  -1  -7   26.00    6.00
  -4  -1  -7   32.40    4.40
  -4  -1  -7   19.90    3.80
   4   1  -7   23.30    3.90
  -4   1   7   29.00    4.20
   4   1  -7   25.80    3.40
   4  -1   7   24.50    4.00
   4   1  -7   24.80    4.10
   4   1   7   40.40    4.80
   4  -1  -7   25.90    3.40
   4  -1  -7   23.20    3.80
  -4   1  -7   22.40    5.70
   4  -1  -7   29.60    3.30
   4  -1  -7   29.20    4.50
   4   1   7   29.30    3.40
  -4   1  -7   28.00    4.50
  -4  -1   7   19.80    3.40
  -4   1  -7   19.50    3.50
   4  -1   8  146.49   12.10
  -4  -1  -8  165.78   12.40
   4   1  -8  164.98   11.20
   4   1  -8  147.99   12.00
  -4   1   8  160.68   12.70
   4   1  -8  168.88   12.50
  -4  -1  -8  142.79   14.10
  -4  -1  -8  154.88   12.50
  -4   1   8  148.79   12.00
   4   1   8  157.58   11.10
   4  -1  -8  150.38   10.80
  -4   1  -8  158.38   14.80
   4  -1  -8  153.88   11.20
  -4   1  -8  153.68   12.40
  -4   1  -8  172.78   12.50
   4  -1  -8  144.39   12.20
   4   1   8  164.78   12.30
   4  -1  -8  154.28   12.20
  -4  -1   8  165.68   12.10
  -4   1   9   17.90    4.30
  -4  -1  -9   11.30    3.50
   4   1  -9   15.30    2.70
  -4  -1  -9   14.10    3.40
   4  -1   9   22.60    4.20
  -4   1   9   13.70    3.50
   4   1  -9   21.80    4.30
  -4  -1  -9   25.40    6.40
   4   1  -9   12.30    3.30
  -4   1  -9   15.10    3.80
   4  -1  -9   12.10    2.60
   4   1   9   13.00    3.20
  -4   1  -9   29.50    5.00
   4  -1  -9   14.70    3.90
   4  -1  -9   14.80    3.40
  -4   1  -9   16.10    5.50
  -4  -1   9   21.20    4.10
   4   1 -10   19.00    4.60
  -4  -1 -10   17.80    3.90
  -4  -1 -10   19.60    6.20
   4  -1  10   16.50    4.10
  -4   1  10   14.70    3.80
  -4  -1 -10   14.60    4.30
   4   1  10   16.20    4.00
   4  -1 -10   11.10    3.80
  -4   1 -10   22.60    6.30
  -4  -1  10   18.50    3.80
  -4   1 -10   22.20    4.80
  -4   1 -10   14.60    3.70
   4  -1 -10   15.50    4.00
   4   1 -11    5.60    3.30
  -4  -1 -11    3.20    3.50
  -4  -1 -11   10.50    4.90
  -4   1  11    3.90    2.90
   4   1 -11    6.50    3.30
  -4  -1 -11   10.20    3.60
   4  -1  11    3.20    3.00
   4  -1 -11    6.80    3.60
  -4   1 -11    7.50    3.00
  -4   1 -11   -0.50    2.90
   4  -1 -11    4.60    2.90
  -4   1 -11    3.10    3.40
   4   1  11    1.80    2.70
  -4  -1  11    6.40    2.90
   4  -1  12   16.60    4.60
  -4  -1 -12   13.10    4.60
  -4  -1 -12   28.60    7.50
  -4  -1 -12   18.60    4.90
   4   1 -12   21.90    5.60
  -4   1  12   19.50    5.00
   4   1 -12   23.60    5.10
  -4   1 -12   19.90    5.60
  -4  -1  12   14.80    4.20
  -4   1 -12   15.80    4.40
   4   1  12   12.50    4.10
  -4   1 -12   24.20    7.00
   4  -1 -12   23.00    5.20
   4  -1 -12   19.70    5.30
  -4  -1 -13    6.80    4.60
   4   1 -13    8.10    4.00
   4   1 -13    5.90    4.60
  -4   1  13   14.50    4.60
  -4  -1 -13    9.20    4.00
  -4  -1 -13   17.40    5.60
   4  -1  13    2.30    3.10
  -4   1 -13   12.30    5.50
   4  -1 -13    5.10    3.70
   4   1  13    1.50    3.00
  -4   1 -13    2.20    4.40
  -4   1 -13   16.60    5.00
   4  -1 -13    9.40    4.50
  -4  -1  13    9.00    5.60
   5   1   0   18.00    2.10
  -5  -1   0   18.20    2.40
  -5  -1   0   14.60    2.00
   5  -1   0   19.90    2.80
   5   1   0   16.90    2.20
  -5   1   0   17.20    2.50
  -5   1   0   21.40    4.60
   5  -1   0   16.40    2.40
  -5  -1   0   23.80    4.70
   5  -1   0   16.20    2.30
   5  -1   0   23.20    2.70
   5   1   0   17.80    2.20
  -5   1   0   23.30    3.10
   5   1  -1  679.53   44.20
  -5   1   1  708.43   44.60
  -5  -1  -1  731.43   46.70
  -5  -1  -1  722.73   44.20
   5  -1   1  692.43   44.50
  -5   1   1  696.83   44.80
  -5   1   1  695.13   46.40
   5   1  -1  681.63   44.20
   5  -1   1  715.53   44.80
   5  -1   1  713.33   44.50
  -5  -1  -1  721.53   44.40
   5   1  -1  710.03   44.60
  -5   1  -1  678.03   44.70
   5  -1  -1  714.73   44.60
   5  -1  -1  692.73   44.50
  -5   1  -1  636.14   46.40
  -5   1  -1  695.63   44.50
  -5  -1   1  707.13   44.30
   5   1   1  739.83   44.40
   5   1   1  739.23   44.20
   5  -1  -1  698.73   44.60
   5  -1  -1  741.33   44.70
   5   1   1  728.03   44.50
  -5  -1   1  715.33   44.20
   5  -1   2  120.49    8.20
  -5   1   2  120.29    8.50
   5   1  -2  123.19    8.20
  -5  -1  -2  108.19   10.80
   5   1  -2  123.09    8.20
   5   1  -2  110.39    8.40
  -5  -1  -2  113.59    8.10
   5  -1   2  129.09    8.80
  -5   1   2  110.29    8.60
  -5  -1  -2  115.99    8.30
   5  -1   2  129.49    8.60
   5   1   2  116.29    8.20
  -5   1  -2  122.49   11.40
  -5  -1   2  130.79    8.20
  -5   1  -2  115.89    8.70
  -5   1  -2  118.99    8.40
   5  -1  -2  114.89    8.40
   5   1   2  124.29    8.20
   5  -1  -2  112.39    8.40
   5  -1  -2  118.29    8.50
   5  -1  -2  119.99    8.50
  -5  -1   2  119.69    8.20
   5  -1   3  130.99    8.30
   5   1  -3  135.09    8.70
  -5  -1  -3  117.29   11.60
  -5   1   3  112.29    8.90
  -5  -1  -3  114.99    8.60
   5   1  -3  122.09    8.80
  -5  -1  -3  114.59    8.80
  -5   1   3  112.89    8.80
   5   1  -3  134.99    8.70
   5  -1   3  130.69    8.90
   5  -1  -3  107.49    8.80
   5  -1  -3  109.89    8.70
  -5   1  -3  126.39    9.10
   5   1   3  113.29    8.30
  -5  -1   3  138.79    8.80
   5  -1  -3  114.39    8.70
   5  -1  -3  114.99    8.60
  -5   1  -3  138.49    9.00
   5   1   3  119.39    8.60
  -5   1  -3  139.79   12.20
  -5  -1   3  134.29    8.60
   5  -1   4   97.39    7.50
   5   1  -4   89.29    7.20
   5   1  -4   93.79    7.20
  -5  -1  -4  101.19   10.50
  -5   1   4  100.89    7.10
  -5  -1  -4  108.29    7.40
   5   1  -4   89.09    7.10
  -5   1   4  104.79    7.50
  -5  -1  -4  103.49    7.50
   5  -1   4   93.99    6.50
  -5   1   4   98.59    7.60
   5   1   4   94.49    6.60
   5   1   4   96.29    7.20
  -5   1  -4  100.79   10.80
  -5  -1   4   86.09    6.70
  -5  -1   4   93.39    7.30
   5  -1  -4   89.39    7.30
  -5  -1   4   94.39    7.20
  -5   1  -4   96.19    7.70
   5  -1  -4   94.79    7.40
   5  -1  -4   93.49    7.20
  -5   1  -4   99.49    7.50
   5  -1  -4   96.19    7.10
   5  -1   5   11.70    2.60
  -5  -1  -5   16.10    2.60
   5   1  -5   16.50    2.70
  -5  -1  -5   19.80    3.10
  -5  -1  -5   13.60    5.00
  -5   1   5   18.40    2.80
  -5   1   5   16.90    3.10
  -5   1   5   17.80    2.40
   5  -1   5   11.10    1.50
   5   1  -5   16.10    2.60
   5   1  -5    7.40    2.20
   5  -1  -5   17.80    2.60
  -5  -1   5   11.20    1.70
   5   1   5   17.00    2.80
  -5   1  -5   14.60    2.70
  -5  -1   5   14.60    2.70
  -5   1  -5   12.10    2.80
   5  -1  -5   20.00    3.10
   5  -1  -5   20.90    3.10
   5   1   5   12.70    1.60
   5  -1  -5   15.60    2.50
  -5   1  -5   17.30    5.20
  -5  -1   5   12.80    2.40
  -5   1   6   83.59    7.80
  -5   1   6   86.99    8.00
   5  -1   6   96.39    8.00
   5   1  -6   99.19    7.50
   5   1  -6  107.09    8.00
  -5  -1  -6   90.99    7.70
  -5  -1  -6   97.79   10.50
   5  -1   6   96.69    6.10
  -5   1   6   89.69    7.00
  -5  -1  -6   89.69    8.00
   5   1  -6   89.99    7.70
  -5  -1   6  101.29    6.50
   5  -1  -6   85.29    7.80
  -5  -1   6  105.99    7.80
   5  -1  -6   90.29    7.20
   5  -1  -6   89.59    7.30
  -5   1  -6   90.39   10.60
   5   1   6   89.99    7.70
  -5   1  -6   96.09    7.90
  -5   1  -6  109.49    8.40
   5  -1  -6   92.39    7.90
  -5  -1   6   95.29    7.90
  -5  -1  -7   30.00    4.50
  -5   1   7   28.80    4.70
   5  -1   7   42.40    5.10
   5   1  -7   39.00    4.90
  -5  -1  -7   25.40    4.20
   5   1  -7   31.10    3.90
  -5  -1  -7   24.80    6.30
   5   1  -7   34.60    4.50
  -5   1   7   26.50    4.30
  -5   1  -7   28.20    4.50
   5  -1  -7   24.40    4.10
   5  -1  -7   29.20    3.80
   5  -1  -7   29.90    3.70
  -5  -1   7   40.90    5.20
  -5  -1   7   29.10    4.10
  -5   1  -7   34.30    7.40
  -5   1  -7   42.80    5.30
   5  -1  -7   28.60    4.50
   5   1   7   23.20    4.00
  -5  -1  -8  151.58   14.30
   5   1  -8  131.89   11.30
  -5  -1  -8  169.48   12.00
   5   1  -8  126.09   11.30
  -5   1   8  160.88   11.80
   5   1  -8  132.99   10.50
  -5  -1  -8  162.78   12.00
   5  -1   8  139.29   11.60
  -5   1   8  166.98   12.20
  -5   1  -8  119.79   11.60
  -5  -1   8  144.69   11.40
   5  -1  -8  159.08   12.00
   5  -1  -8  157.08   10.40
   5  -1  -8  155.88   11.80
  -5   1  -8  123.39   11.40
   5   1   8  141.99   11.40
   5  -1  -8  153.88   10.80
  -5   1  -8  130.69   13.90
   5   1  -9   11.10    2.60
   5   1  -9   14.10    3.70
  -5   1   9    5.60    3.00
   5  -1   9   19.50    4.10
  -5  -1  -9    9.80    3.10
   5   1  -9   12.50    3.40
  -5   1   9   11.30    3.80
  -5  -1  -9   15.20    5.30
  -5  -1  -9   11.60    3.50
  -5   1  -9   11.20    5.10
  -5   1  -9   11.50    3.50
   5  -1  -9    7.20    2.40
   5  -1  -9   11.50    3.30
  -5  -1   9   21.50    3.90
   5   1   9    5.40    2.60
   5  -1  -9   13.30    3.60
  -5   1  -9   12.30    3.60
  -5  -1 -10    6.60    3.60
   5  -1  10    5.30    3.20
  -5  -1 -10    5.00    2.80
  -5  -1 -10    5.80    4.10
  -5   1  10    9.60    3.50
   5   1 -10   13.30    3.70
   5   1 -10    8.20    3.30
  -5   1 -10    3.20    2.70
  -5   1 -10   15.00    5.80
  -5  -1  10   15.50    4.00
   5   1  10    9.00    3.20
  -5   1 -10    6.90    3.80
   5  -1 -10    9.90    3.70
   5  -1 -10    4.60    2.90
   5   1 -11   12.30    4.00
   5  -1  11    7.90    3.60
  -5  -1 -11    5.50    3.50
   5   1 -11   12.00    4.30
  -5  -1 -11    6.50    3.00
  -5  -1 -11   10.00    5.10
  -5   1  11   12.40    4.10
  -5   1 -11   20.30    4.80
  -5   1 -11   14.10    5.70
   5  -1 -11   11.30    3.80
   5   1  11    9.20    3.60
  -5   1 -11   10.50    4.00
  -5  -1  11   11.50    3.80
   5  -1 -11    3.60    3.50
  -5   1  12   58.49    7.90
   5  -1  12   42.40    7.20
  -5  -1 -12   52.89    8.30
  -5  -1 -12   63.69   11.10
  -5  -1 -12   72.49    8.90
   5   1 -12   48.20    8.40
   5   1 -12   61.29    8.60
  -5   1 -12   48.00    8.10
   5  -1 -12   64.99    8.80
   5  -1 -12   57.19    8.50
   5   1  12   59.39    8.00
  -5   1 -12   47.90    7.90
  -5   1 -12   68.69   12.30
  -5   1  13   22.20    6.90
  -5  -1 -13    9.00    4.60
   5  -1  13   15.50    4.90
  -5  -1 -13   19.80    5.70
  -5  -1 -13   15.30    4.70
   5   1 -13   10.10    4.20
  -5   1 -13   15.10    4.90
  -5   1 -13    8.00    4.50
   5  -1 -13   15.10    5.20
  -5   1 -13   25.00    7.60
   5   1  13   13.40    4.60
   5  -1 -13   14.70    4.90
   6  -1   0   10.40    2.20
  -6  -1   0    9.10    1.90
  -6   1   0    5.70    3.50
  -6   1   0   10.50    2.50
   6   1   0    9.10    1.80
   6   1   0   10.90    1.70
   6  -1   0    6.10    2.00
  -6   1   0    4.90    1.80
   6  -1   0    7.10    1.60
   6  -1   0    7.20    2.00
  -6  -1   0    7.70    3.40
   6   1   0    6.60    1.60
   6   1  -1  270.47   17.90
   6  -1   1  285.97   18.20
  -6   1   1  266.07   18.50
  -6  -1  -1  267.57   17.80
  -6  -1  -1  292.17   20.90
  -6  -1  -1  257.37   18.10
  -6   1   1  256.67   20.40
   6  -1   1  290.67   18.40
  -6   1   1  264.87   18.20
   6  -1   1  288.47   18.60
   6   1  -1  284.87   18.40
   6   1  -1  276.67   17.90
   6  -1  -1  285.47   18.40
   6  -1  -1  277.47   18.30
   6   1   1  278.87   18.20
   6   1   1  278.77   18.10
  -6  -1   1  257.17   20.30
  -6   1  -1  289.17   18.30
  -6  -1   1  286.17   17.90
  -6   1  -1  274.27   20.90
   6  -1  -1  274.57   18.40
   6   1   1  275.17   17.90
  -6   1  -1  288.27   18.60
   6  -1  -1  291.47   18.40
  -6  -1   1  279.67   18.00
   6   1  -2  137.99   10.20
   6  -1   2  153.98   10.40
  -6  -1  -2  164.58   10.40
  -6  -1  -2  161.88   13.80
   6   1  -2  153.18   10.30
   6  -1   2  150.48   10.90
  -6  -1  -2  154.18   10.60
   6   1  -2  156.38   10.70
  -6   1   2  138.19   10.70
   6  -1   2  150.58   10.60
  -6   1   2  153.78   10.70
  -6   1  -2  151.08   10.60
   6  -1  -2  158.38   10.70
  -6   1  -2  135.89   13.40
   6  -1  -2  148.89   10.60
  -6   1  -2  144.59   10.90
  -6  -1   2  144.99   10.30
  -6  -1   2  158.98   10.40
   6  -1  -2  158.48   10.70
   6  -1  -2  162.98   10.80
   6   1   2  152.48   10.30
   6   1   2  143.29   10.30
   6   1  -3   58.19    4.70
  -6  -1  -3   49.50    4.60
  -6  -1  -3   69.29    9.50
  -6   1   3   52.49    5.00
  -6  -1  -3   55.19    4.90
   6   1  -3   59.79    4.60
  -6   1   3   46.80    4.90
   6   1  -3   56.39    4.90
   6  -1   3   58.09    5.10
   6  -1   3   55.59    4.40
   6  -1  -3   54.89    4.80
   6  -1  -3   51.29    4.80
  -6   1  -3   64.99    5.10
  -6  -1   3   63.59    4.80
   6  -1  -3   48.60    4.80
  -6  -1   3   61.39    4.80
   6  -1  -3   43.60    4.70
  -6   1  -3   67.49    9.70
   6   1   3   51.49    4.40
  -6   1  -3   61.79    5.30
   6   1   3   57.29    4.70
   6   1  -4  105.79    7.10
   6   1  -4   91.09    7.20
  -6   1   4   71.99    7.20
   6  -1   4   93.09    6.50
  -6  -1  -4   80.69    6.90
   6   1  -4  107.69    7.10
   6  -1   4  115.69    7.70
  -6  -1  -4   83.09    7.20
  -6   1   4   65.89    6.70
  -6   1   4   77.49    7.10
  -6  -1  -4   73.79   10.60
   6   1   4   83.19    6.50
  -6   1  -4  109.09    7.50
   6   1   4   78.29    6.90
   6  -1  -4   78.49    7.00
  -6  -1   4  115.89    7.20
   6  -1  -4   79.89    7.20
   6  -1  -4   90.09    7.30
   6  -1  -4   91.89    7.00
  -6   1  -4  109.39    7.80
  -6  -1   4  112.29    7.40
  -6   1  -4  101.39   11.00
  -6  -1  -5  113.69   12.10
   6   1  -5  103.29    8.20
  -6   1   5   95.39    8.40
  -6   1   5  108.89    8.80
   6   1  -5  115.99    8.40
  -6  -1  -5   99.89    8.30
   6  -1   5  111.19    7.40
  -6  -1  -5  104.49    8.60
   6  -1   5  111.89    8.60
  -6   1   5  103.39    8.00
   6   1  -5  112.39    8.40
  -6  -1   5  103.69    7.60
   6  -1  -5  112.39    8.50
  -6  -1   5  113.99    8.40
  -6   1  -5  106.49   12.30
   6   1   5  107.59    8.30
   6   1   5   98.89    7.40
  -6   1  -5  115.29    8.60
   6  -1  -5  100.79    8.30
   6  -1  -5  112.09    8.20
   6  -1  -5  107.39    8.50
  -6  -1   5  121.49    8.70
  -6   1  -5  111.79    8.90
   6  -1   6  103.29    7.10
  -6  -1  -6  110.19    8.90
  -6   1   6  108.09    8.90
   6   1  -6  102.19    8.50
  -6   1   6  106.89    8.60
  -6  -1  -6  102.89    8.40
  -6  -1  -6  133.99   12.50
  -6   1   6  113.59    8.00
   6   1  -6  104.29    8.30
   6   1  -6   91.59    8.30
   6  -1   6  100.59    8.60
  -6  -1   6  100.19    8.60
   6  -1  -6  115.39    8.80
   6  -1  -6  110.29    8.10
   6  -1  -6  113.89    8.80
  -6  -1   6   91.19    7.30
  -6   1  -6  102.19    9.00
  -6   1  -6   91.89   11.80
  -6  -1   6   97.69    8.30
  -6   1  -6  104.19    8.70
   6  -1  -6  116.39    8.40
   6   1   6  115.99    8.60
   6  -1   7   12.10    3.30
   6   1  -7   19.10    3.50
   6   1  -7   10.60    2.70
  -6   1   7   13.00    2.50
   6   1  -7   12.40    3.00
  -6   1   7   17.50    3.80
  -6  -1  -7   12.40    3.00
  -6  -1  -7   13.10    3.50
  -6  -1  -7   13.90    5.40
  -6   1   7    9.80    3.20
   6  -1  -7   12.00    3.30
  -6   1  -7   17.00    4.00
  -6   1  -7   22.30    6.60
   6   1   7   16.40    3.40
   6  -1  -7   10.10    2.50
   6  -1  -7    7.50    2.30
  -6   1  -7   18.60    3.70
  -6  -1   7   12.10    2.90
  -6  -1   7   15.90    3.40
   6  -1  -7   13.00    3.40
  -6   1   8   83.69    7.80
  -6  -1  -8   77.09    7.10
   6   1  -8   54.79    6.10
   6  -1   8   63.89    7.50
   6   1  -8   73.79    7.10
  -6  -1  -8   76.19    7.60
   6   1  -8   71.99    7.10
  -6  -1  -8   76.59    9.80
  -6   1   8   78.39    7.30
  -6  -1   8   63.39    6.80
   6  -1  -8   66.09    7.10
   6  -1  -8   70.99    6.10
   6   1   8   75.99    7.20
   6  -1  -8   80.99    7.40
  -6   1  -8   88.89    7.50
   6  -1  -8   58.79    6.20
  -6   1  -8   71.79    7.60
  -6   1  -8   70.59   11.30
   6   1  -9   12.70    3.50
  -6   1   9    5.70    3.20
   6   1  -9   16.40    4.10
  -6   1   9    7.40    3.30
   6  -1   9    8.80    3.30
  -6  -1  -9   11.60    4.90
   6   1  -9   11.00    2.90
  -6  -1  -9    4.60    3.00
  -6  -1  -9   14.20    3.70
  -6   1  -9   15.20    4.10
   6  -1  -9   14.50    3.90
   6  -1  -9    8.60    2.80
  -6   1  -9   17.90    6.10
  -6  -1   9   11.80    3.40
   6   1   9   11.70    3.50
  -6   1  -9    9.40    3.00
   6  -1  -9   17.60    4.20
  -6  -1 -10    2.50    3.30
   6   1 -10    1.40    2.70
   6   1 -10    2.10    2.50
  -6  -1 -10    1.30    3.10
  -6  -1 -10    2.40    2.40
  -6   1  10    0.40    2.40
   6  -1  10    4.80    3.00
  -6   1  10    3.90    3.20
  -6   1 -10    6.70    4.40
   6  -1 -10    6.50    3.00
   6  -1 -10    5.10    3.10
   6   1  10    1.20    2.70
  -6   1 -10    1.30    3.20
  -6   1 -10    3.40    2.80
  -6   1  11    5.20    3.30
   6  -1  11    2.10    2.90
  -6  -1 -11    7.50    3.50
  -6  -1 -11    8.00    3.80
   6   1 -11    6.90    3.40
  -6  -1 -11    1.70    3.30
   6  -1 -11    3.90    3.40
  -6   1 -11    7.60    4.20
  -6   1 -11    6.10    3.70
   6   1  11    5.70    3.10
   6  -1 -11   -1.50    2.40
  -6   1 -11    4.80    3.30
  -6  -1 -12    0.70    3.20
   6  -1  12    1.60    3.00
   6   1 -12    4.30    3.40
  -6  -1 -12    3.30    3.00
  -6  -1 -12    6.30    3.30
  -6   1 -12   -0.10    3.80
  -6   1 -12    1.40    3.00
   6   1  12    6.00    3.80
   6  -1 -12    3.30    3.10
   6  -1 -12    0.70    2.90
  -6   1 -12   10.80    5.10
  -6  -1 -13    9.50    4.10
   6  -1  13    6.10    4.00
   6   1 -13    9.50    4.60
  -6  -1 -13   17.70    5.40
  -6  -1 -13    6.20    4.50
   6   1  13    9.30    4.00
  -6   1 -13   12.10    4.40
   6  -1 -13   11.50    4.50
  -6   1 -13    1.40    4.60
  -6   1 -13   20.30    6.70
   7   1   0   64.39    5.40
  -7   1   0   66.69    5.90
   7  -1   0   65.79    5.50
   7  -1   0   70.69    5.80
   7  -1   0   60.99    5.60
   7   1   0   62.99    5.10
  -7  -1   0   55.89    7.90
  -7  -1   0   62.09    5.30
  -7   1   0   71.09    8.20
   7   1   0   66.69    5.20
  -7   1   0   68.89    5.60
   7   1  -1   42.80    3.80
   7  -1   1   42.30    4.40
   7  -1   1   42.60    4.20
   7   1  -1   36.80    3.80
  -7  -1  -1   33.20    6.50
  -7   1   1   41.20    4.30
   7  -1   1   34.60    3.70
  -7  -1  -1   35.40    4.10
  -7   1   1   39.70    7.00
   7   1  -1   41.90    3.50
  -7  -1  -1   34.00    3.30
  -7   1   1   38.00    4.20
  -7   1  -1   53.09    8.20
   7  -1  -1   39.60    4.20
   7   1   1   33.30    3.80
  -7   1  -1   45.70    4.90
   7  -1  -1   33.20    4.10
   7  -1  -1   40.50    4.00
   7   1   1   30.00    3.40
  -7   1  -1   39.60    3.90
  -7  -1   1   50.29    7.50
   7  -1  -1   44.70    4.80
   7   1   1   28.90    3.70
  -7  -1   1   44.60    3.70
  -7  -1   1   41.70    3.60
   7  -1   2  121.69    9.10
  -7   1   2  127.59    9.20
  -7  -1  -2  130.89   12.60
  -7   1   2  121.59   11.90
   7  -1   2  129.79    8.90
  -7   1   2  119.59    9.30
   7  -1   2  121.59    9.40
   7   1  -2  120.59    9.10
   7   1  -2  123.29    8.80
  -7  -1  -2  117.89    9.10
   7   1  -2  127.39    8.70
  -7  -1  -2  135.49    8.80
   7  -1  -2  107.29    8.90
   7   1   2  129.19    9.20
   7   1   2  122.59    8.70
   7   1   2  116.89    8.80
  -7  -1   2  127.09    8.90
   7  -1  -2  126.99    9.30
   7  -1  -2  133.09    9.30
   7  -1  -2  121.39    9.10
  -7   1  -2  121.49    9.50
  -7   1  -2  124.19    9.00
  -7   1  -2  130.49   13.10
  -7  -1   2  124.79    8.90
  -7  -1  -3  261.47   18.00
   7   1  -3  270.57   17.70
  -7  -1  -3  263.67   17.70
   7   1  -3  261.47   18.10
   7  -1   3  269.67   18.10
  -7  -1  -3  234.98   21.40
   7  -1   3  279.07   17.70
  -7   1   3  274.77   18.10
   7  -1   3  268.57   18.50
   7   1  -3  277.07   17.80
  -7   1   3  263.67   18.30
   7   1   3  281.47   17.70
   7  -1  -3  267.57   18.20
   7  -1  -3  271.97   18.00
   7  -1  -3  274.77   18.10
  -7   1  -3  273.37   18.10
  -7   1  -3  274.47   18.40
  -7   1  -3  262.67   21.80
  -7  -1   3  262.57   17.90
   7   1   3  257.77   17.70
  -7  -1   3  272.17   17.70
   7  -1  -3  256.77   18.00
   7   1  -4   67.79    5.70
  -7  -1  -4   67.39    5.50
  -7  -1  -4   66.89   10.50
  -7   1   4   62.79    5.90
   7   1  -4   66.59    5.70
  -7   1   4   67.09    6.10
   7  -1   4   62.59    5.00
  -7  -1  -4   58.79    5.80
   7  -1   4   66.49    5.90
   7   1  -4   62.29    5.40
  -7   1  -4   70.49   11.20
   7   1   4   62.49    5.60
  -7   1  -4   63.39    5.70
  -7   1  -4   59.29    6.10
  -7  -1   4   60.39    5.60
  -7  -1   4   65.69    5.60
   7  -1  -4   58.39    5.80
   7  -1  -4   67.99    5.60
   7   1   4   63.59    5.00
   7  -1  -4   62.79    5.70
   7  -1  -4   67.29    5.80
   7   1  -5   15.10    2.80
  -7   1   5   22.30    3.30
   7  -1   5   14.40    2.20
  -7  -1  -5   23.80    3.90
  -7  -1  -5   32.60    8.50
   7   1  -5   17.10    3.30
  -7   1   5   18.40    3.40
   7  -1   5   20.20    3.40
  -7   1   5   19.80    3.60
  -7  -1  -5   24.80    3.50
   7   1  -5   16.80    3.10
   7  -1  -5   26.60    3.80
   7   1   5   21.90    3.40
  -7  -1   5   16.50    3.00
  -7   1  -5   19.80    3.30
   7  -1  -5   26.20    3.80
   7  -1  -5   28.90    3.90
  -7  -1   5   12.90    3.00
   7  -1  -5   23.00    3.50
  -7   1  -5   28.20    7.50
   7   1   5   20.70    2.60
  -7   1  -5   16.20    3.60
  -7  -1   5   18.80    2.80
  -7  -1  -6   23.30    7.30
   7   1  -6   14.20    3.00
  -7   1   6   15.80    3.50
  -7   1   6   21.70    3.70
   7   1  -6   14.50    2.90
  -7   1   6   17.50    2.90
   7   1  -6    9.10    2.80
  -7  -1  -6   22.20    3.90
   7  -1   6   22.10    3.70
  -7  -1  -6   19.90    3.20
  -7   1  -6   14.70    3.10
   7  -1  -6   16.10    3.10
   7   1   6   17.10    3.20
   7   1   6   13.50    2.20
  -7  -1   6   13.10    3.00
   7  -1  -6   19.00    3.20
  -7   1  -6   21.70    4.10
  -7  -1   6   16.90    3.40
   7  -1  -6   20.90    3.60
   7  -1  -6   15.40    3.30
  -7   1  -6   16.80    6.20
   7  -1   7  137.29   11.50
  -7  -1  -7  140.69   14.90
   7   1  -7  138.89   11.20
  -7   1   7  141.29   11.30
   7   1  -7  144.89   11.00
  -7   1   7  146.89   11.90
  -7  -1  -7  147.09   11.70
  -7  -1  -7  145.89   11.30
   7   1  -7  150.48   11.40
  -7   1  -7  121.59   14.20
  -7  -1   7  155.08   11.60
  -7   1  -7  152.58   12.00
   7   1   7  161.68   11.50
   7  -1  -7  159.48   11.70
   7  -1  -7  139.59   10.70
  -7   1  -7  144.79   11.50
  -7  -1   7  135.99   11.10
   7  -1  -7  134.59   11.00
   7  -1  -7  147.29   11.50
  -7  -1  -8    7.10    2.70
   7   1  -8    9.60    2.80
  -7   1   8    9.30    3.10
  -7  -1  -8    7.90    3.20
   7  -1   8    7.40    3.20
   7   1  -8    6.70    2.90
  -7   1   8   11.90    3.40
   7   1  -8   10.40    3.20
  -7  -1  -8    8.60    4.90
  -7   1  -8    7.80    4.60
  -7   1  -8    5.80    3.20
  -7   1  -8   11.90    3.30
   7  -1  -8   10.30    2.90
  -7  -1   8    7.90    3.20
   7  -1  -8    8.50    3.10
   7  -1  -8    6.70    2.90
   7   1   8    8.50    3.00
   7  -1  -8   10.50    2.70
  -7   1   9   17.90    4.10
  -7  -1  -9    8.80    3.50
   7  -1   9   20.90    4.20
   7   1  -9   11.70    3.30
  -7   1   9   20.50    4.40
  -7  -1  -9   17.90    6.20
  -7  -1  -9   13.70    3.50
   7   1  -9   22.00    4.50
   7   1   9   17.20    4.00
  -7   1  -9   13.30    4.30
   7  -1  -9   23.90    4.60
  -7   1  -9   13.40    3.50
   7  -1  -9   14.70    3.50
   7  -1  -9   22.70    4.60
  -7   1  -9   19.80    6.50
  -7  -1 -10    9.00    4.00
  -7  -1 -10    7.30    3.10
   7   1 -10    9.30    3.50
   7  -1  10   12.20    3.90
  -7  -1 -10   11.30    4.90
  -7   1  10    4.30    3.00
   7   1 -10    9.20    3.20
  -7   1 -10   10.80    5.30
   7  -1 -10   15.10    4.10
   7   1  10    8.30    3.40
  -7   1 -10    5.30    3.70
  -7   1 -10   11.90    3.50
   7  -1 -10    9.60    3.60
   7  -1 -10    8.30    2.80
  -7  -1 -11    5.50    2.90
  -7  -1 -11    0.40    3.20
   7  -1  11    0.90    3.00
  -7  -1 -11    9.10    4.50
   7   1 -11    5.90    3.50
  -7   1 -11   15.10    5.70
  -7   1 -11    3.50    3.00
   7   1  11    1.50    3.00
   7  -1 -11    1.10    3.00
  -7   1 -11   -2.20    3.00
   7   1 -12    3.70    3.40
  -7  -1 -12   -1.70    3.10
  -7  -1 -12   13.50    4.70
   7  -1  12    7.00    3.80
  -7   1 -12    4.50    3.40
  -7   1 -12    9.40    4.50
   7   1  12   -0.10    2.90
  -7   1 -12    2.80    4.40
   7  -1 -12    4.00    3.60
  -8   1   0   10.90    2.90
   8   1   0   11.30    2.20
   8   1   0   11.40    2.20
  -8  -1   0   10.90    5.20
  -8  -1   0    8.60    2.20
   8  -1   0   11.80    2.40
   8  -1   0   10.30    2.60
   8  -1   0   15.00    2.80
   8   1   0   15.20    2.60
  -8   1   0   11.20    2.50
  -8  -1   0   11.70    2.00
  -8   1   0   11.90    4.90
  -8   1   1   61.69    5.70
  -8   1   1   50.99    5.70
  -8   1   1   59.89    9.20
   8  -1   1   66.69    6.20
  -8  -1  -1   44.50    5.30
  -8  -1  -1   64.09    5.10
  -8  -1  -1   52.59    8.90
   8  -1   1   64.89    5.50
   8   1  -1   62.49    5.60
   8   1  -1   67.69    5.10
   8  -1   1   70.89    5.90
   8   1  -1   65.69    5.40
  -8  -1   1   69.89    9.00
  -8  -1   1   69.59    5.40
  -8   1  -1   67.69    5.50
   8  -1  -1   61.39    5.60
   8   1   1   58.89    5.50
   8  -1  -1   65.09    5.80
   8   1   1   64.09    5.20
   8  -1  -1   61.59    5.60
  -8  -1   1   68.09    5.30
   8   1   1   60.79    5.40
  -8   1  -1   77.19    6.40
  -8   1  -1   65.39    9.70
   8  -1  -1   61.59    5.80
   8  -1   2  140.69   10.60
  -8  -1  -2  133.49   10.10
   8   1  -2  135.79    9.80
  -8  -1  -2  151.18   14.30
  -8   1   2  141.49   10.40
   8   1  -2  139.79   10.20
   8   1  -2  126.09    9.50
  -8   1   2  125.59   12.90
  -8  -1  -2  140.19    9.70
  -8   1   2  139.89   10.30
   8  -1   2  141.19   10.20
   8  -1   2  141.79    9.90
   8   1   2  135.09    9.70
   8   1   2  147.69   10.00
  -8  -1   2  137.59    9.90
   8  -1  -2  146.39   10.30
  -8   1  -2  133.59   10.60
   8  -1  -2  141.19   10.30
  -8   1  -2  132.99   10.00
  -8  -1   2  138.39   13.40
   8  -1  -2  135.79   10.10
   8   1   2  138.89   10.10
  -8   1  -2  116.89   13.50
  -8  -1   2  134.99    9.80
   8  -1  -2  140.29   10.30
  -8  -1  -3  138.89   13.60
   8   1  -3  114.69    8.40
   8  -1   3  116.39    9.00
  -8   1   3  112.69    9.00
   8  -1   3  124.49    9.60
  -8  -1  -3  113.79    8.90
  -8  -1  -3  116.59    8.50
  -8   1   3  110.39    9.10
   8  -1   3  110.79    8.40
   8   1  -3  107.89    8.60
   8   1  -3  104.89    8.80
   8  -1  -3  118.79    9.10
   8  -1  -3  110.59    9.00
   8   1   3  127.09    9.20
  -8  -1   3  114.99    8.60
   8  -1  -3  107.79    8.90
   8  -1  -3  117.09    8.80
   8   1   3  115.19    8.50
   8   1   3  121.19    8.50
  -8  -1   3  114.99    8.60
  -8   1  -3  123.89   14.10
  -8   1  -3  110.49    9.40
  -8   1  -3  108.09    8.70
  -8  -1  -4  118.69    9.20
  -8   1   4  130.89    9.90
   8  -1   4  114.49    8.80
   8   1  -4  124.09    9.70
  -8  -1  -4  117.19   14.50
   8   1  -4  123.89    9.20
   8   1  -4  127.19    9.40
   8  -1   4  128.69    9.70
  -8   1   4  130.19    9.90
  -8  -1  -4  125.99    9.70
  -8  -1   4  134.39    9.50
   8  -1  -4  112.19    9.40
  -8   1  -4  122.29    9.50
   8  -1  -4  120.09    9.60
   8   1   4  130.19    9.00
  -8  -1   4  124.19    9.40
  -8   1  -4  116.69    9.90
   8  -1  -4  136.89    9.90
  -8   1  -4  104.09   13.60
   8  -1  -4  135.59    9.70
   8   1   4  120.39    9.30
  -8   1   5   63.99    6.60
  -8   1   5   61.69    6.40
   8   1  -5   76.39    6.70
  -8   1   5   62.79    6.10
   8   1  -5   73.19    6.40
  -8  -1  -5   67.79   11.60
   8  -1   5   72.79    5.50
   8   1  -5   67.39    6.00
  -8  -1  -5   69.69    6.80
   8  -1   5   74.49    6.60
  -8  -1  -5   64.79    6.10
   8  -1  -5   67.09    6.30
   8   1   5   68.79    5.50
  -8   1  -5   61.09    6.80
  -8   1  -5   72.49   12.40
   8   1   5   63.19    6.20
   8  -1  -5   66.79    6.30
   8  -1  -5   65.39    6.50
  -8  -1   5   70.09    6.30
  -8   1  -5   83.49    6.60
   8  -1  -5   64.99    6.10
  -8  -1   5   75.49    6.40
  -8  -1  -6   70.19    6.80
  -8   1   6   71.29    7.40
   8  -1   6   81.89    7.40
  -8  -1  -6   85.39   13.10
   8   1  -6   71.59    6.80
  -8   1   6   77.19    6.60
  -8  -1  -6   80.09    7.60
  -8   1   6   73.79    7.30
   8   1  -6   64.49    6.70
   8   1   6   72.09    7.00
   8  -1  -6   82.79    7.10
  -8   1  -6   75.59    7.00
  -8  -1   6   80.69    7.00
   8  -1  -6   75.79    6.70
  -8   1  -6   73.99    7.60
   8  -1  -6   71.69    7.20
  -8   1  -6   91.39   13.60
   8  -1  -6   69.99    6.90
  -8   1   7   77.89    7.80
   8   1  -7   82.39    7.30
   8  -1   7   64.29    7.30
  -8  -1  -7   74.79   11.80
  -8  -1  -7   67.99    7.50
  -8  -1  -7   80.19    7.20
  -8   1   7   77.99    7.50
   8   1  -7   72.59    7.10
  -8   1  -7   82.39    7.50
  -8  -1   7   80.69    7.50
   8  -1  -7   77.59    7.30
   8  -1  -7   69.09    7.00
   8  -1  -7   82.19    6.90
   8  -1  -7   74.39    7.50
  -8   1  -7   82.09   12.60
  -8   1  -7   69.29    7.70
   8   1   7   78.39    7.30
   8   1  -8   30.20    4.80
  -8  -1  -8   19.50    4.40
   8  -1   8   23.20    4.50
   8   1  -8   23.10    4.20
  -8   1   8   18.40    4.30
  -8  -1  -8   25.10    7.10
  -8  -1  -8   20.50    3.90
   8  -1  -8   30.10    5.00
  -8   1  -8   15.40    4.40
  -8  -1   8   25.50    4.80
   8  -1  -8   21.80    3.70
   8  -1  -8   28.10    4.70
   8   1   8   26.50    4.50
  -8   1  -8   22.70    4.30
   8  -1  -8   20.40    4.10
  -8   1  -8   30.40    8.40
  -8  -1  -9   11.80    4.00
   8   1  -9   17.20    4.20
   8  -1   9   12.50    4.00
  -8   1   9   16.80    4.30
  -8  -1  -9    9.90    5.60
   8   1  -9   16.60    3.70
   8  -1  -9   13.50    3.70
  -8   1  -9   15.70    3.90
   8   1   9    8.70    3.50
   8  -1  -9    7.40    3.10
  -8   1  -9   22.60    7.30
  -8   1  -9   11.70    4.20
  -8   1  10    4.40    3.50
   8  -1  10    7.30    3.70
  -8  -1 -10   13.20    5.20
   8   1 -10    8.00    3.20
  -8  -1 -10    3.90    3.60
   8   1 -10    7.70    3.50
   8   1  10    1.90    2.90
  -8   1 -10    7.50    4.20
   8  -1 -10   12.50    3.90
  -8   1 -10   10.20    3.70
  -8   1 -10   10.60    5.30
   8  -1 -10    8.60    3.30
  -8  -1 -11   16.90    5.20
  -8  -1 -11    4.20    4.00
   8  -1  11    8.70    4.20
   8   1 -11    7.20    3.80
  -8   1 -11   11.60    4.80
  -8   1 -11    9.00    5.40
  -8   1 -11   10.00    4.40
   8  -1 -11    3.20    3.20
   8   1  11    4.30    3.40
  -8  -1 -12    0.00    3.80
   8   1 -12    3.00    3.60
   8  -1  12    5.20    3.80
   8   1  12    1.50    3.70
  -8   1 -12   -1.40    3.90
   8  -1 -12    7.00    3.90
   9   1   0    5.10    2.10
   9  -1   0    9.90    2.60
   9   1   0   16.60    2.70
   9  -1   0   13.50    3.10
  -9   1   0   10.70    3.20
  -9  -1   0   12.40    2.80
  -9   1   0   17.20    3.20
  -9  -1   0   10.60    2.30
  -9   1   0   16.90    6.20
   9  -1   0   11.90    3.10
  -9  -1   0   16.50    6.50
   9   1   0    8.10    2.30
   9  -1   1   79.99    6.40
   9  -1   1   78.69    6.90
  -9  -1  -1   71.09   11.20
   9   1  -1   89.09    7.30
  -9  -1  -1   58.19    6.30
   9  -1   1   74.69    6.60
  -9  -1  -1   63.39    5.70
   9   1  -1   75.39    6.40
  -9   1   1   68.19    6.70
   9   1  -1   77.99    6.20
  -9   1   1   72.19   10.90
  -9   1   1   66.79    6.60
  -9   1  -1   70.29    7.00
  -9  -1   1   71.89    6.00
   9   1   1   72.09    6.30
  -9  -1   1   74.39   10.10
  -9  -1   1   78.99    6.10
  -9   1  -1   87.79    6.60
   9   1   1   70.09    6.30
   9  -1  -1   67.99    6.30
   9  -1  -1   69.39    6.40
  -9   1  -1   91.59   12.40
   9   1   1   70.39    5.90
   9  -1  -1   66.49    6.60
  -9  -1  -2   13.40    6.80
  -9   1   2    6.20    4.70
  -9   1   2    3.70    2.70
   9  -1   2    6.40    2.50
   9   1  -2    4.00    2.30
   9   1  -2    5.80    2.30
  -9   1   2    3.60    2.30
   9  -1   2    3.10    1.80
   9  -1   2    5.50    3.00
  -9  -1  -2    8.90    2.80
  -9  -1  -2   12.20    2.20
   9  -1  -2    2.00    1.90
  -9   1  -2    3.30    5.70
  -9   1  -2    5.60    2.10
   9   1   2    5.20    1.90
  -9  -1   2    6.00    1.90
   9  -1  -2    8.40    2.20
   9   1   2    4.50    2.10
  -9   1  -2    3.00    2.80
   9  -1  -2    5.30    2.60
   9   1   2    4.90    2.50
  -9  -1   2   10.20    5.00
  -9   1   3   46.50    5.20
  -9  -1  -3   49.00   10.80
  -9   1   3   43.20    5.50
   9  -1   3   46.80    4.60
  -9  -1  -3   44.10    4.50
  -9  -1  -3   46.50    5.60
   9  -1   3   57.39    5.50
   9  -1   3   58.29    6.50
   9   1  -3   48.70    5.20
   9   1  -3   47.00    5.50
  -9   1   3   53.29    9.20
  -9   1  -3   50.19    5.00
   9   1   3   50.49    5.80
  -9   1  -3   56.09   11.20
  -9  -1   3   44.40    4.50
   9  -1  -3   52.79    5.40
   9  -1  -3   52.89    6.10
   9   1   3   42.10    4.50
   9  -1  -3   39.80    4.50
   9   1   3   43.90    4.80
   9  -1  -3   44.20    5.50
  -9   1  -3   54.79    6.50
  -9   1   4   72.89    6.80
  -9  -1  -4   70.19    6.90
  -9   1   4   61.89    6.50
  -9  -1  -4   81.79   12.40
   9  -1   4   62.79    7.10
   9   1  -4   75.49    6.60
   9  -1   4   65.59    5.90
  -9  -1  -4   67.79    6.80
   9   1  -4   67.49    6.30
   9  -1   4   79.49    6.70
  -9   1  -4   65.99    6.20
   9   1   4   75.99    7.50
   9  -1  -4   62.19    6.60
   9   1   4   70.59    6.10
  -9   1  -4   71.59   12.60
   9  -1  -4   67.49    6.70
   9   1   4   69.09    5.90
  -9  -1   4   68.69    6.20
   9  -1  -4   70.39    6.30
  -9   1  -4   63.49    7.00
   9  -1  -4   70.19    6.40
  -9  -1  -5  253.57   23.80
   9  -1   5  271.67   18.40
   9  -1   5  279.07   19.30
  -9   1   5  272.37   19.00
  -9   1   5  296.27   20.20
   9   1  -5  272.27   18.90
  -9   1   5  279.67   19.60
  -9  -1  -5  285.77   19.40
   9   1  -5  257.97   19.20
   9  -1  -5  279.57   19.20
  -9  -1   5  279.37   19.10
   9  -1  -5  286.37   19.20
  -9   1  -5  278.87   19.70
   9   1   5  278.57   19.00
   9   1   5  270.67   18.40
   9  -1  -5  294.77   19.40
  -9   1  -5  259.87   24.70
   9  -1  -5  265.57   19.20
  -9   1  -5  262.77   19.10
   9   1  -6   44.70    5.80
  -9   1   6   49.10    6.20
   9   1  -6   45.20    5.80
  -9  -1  -6   48.50   10.40
  -9   1   6   43.70    6.10
  -9  -1  -6   45.40    5.90
   9  -1   6   41.50    5.70
   9  -1  -6   52.89    6.10
  -9   1  -6   52.29    6.60
   9  -1  -6   52.59    6.20
   9   1   6   50.69    5.80
  -9   1  -6   52.79   11.10
  -9  -1   6   42.80    5.60
  -9   1  -6   47.30    5.90
   9  -1  -6   45.60    6.00
  -9  -1  -7   61.19   11.30
  -9  -1  -7   51.59    7.00
   9  -1   7   53.59    6.90
  -9   1   7   54.99    7.30
   9   1  -7   60.19    6.90
   9   1  -7   58.59    6.80
  -9   1  -7   63.19   11.90
  -9  -1   7   57.89    7.10
   9  -1  -7   62.39    7.30
   9  -1  -7   59.09    7.00
   9  -1  -7   63.19    6.10
  -9   1  -7   65.89    7.90
   9   1   7   53.19    6.50
  -9   1  -7   60.49    7.20
  -9  -1  -8    9.70    6.10
   9  -1   8    1.70    2.70
  -9   1   8    5.50    3.00
   9   1  -8    9.70    3.20
  -9  -1  -8    5.60    3.30
   9   1  -8    8.30    3.40
  -9   1  -8    9.50    4.00
  -9   1  -8   10.30    6.50
   9  -1  -8    8.00    3.50
   9   1   8    8.70    3.00
   9  -1  -8    7.60    3.20
  -9  -1   8    5.20    3.10
  -9   1  -8    5.40    3.10
  -9  -1  -9    6.50    4.80
   9   1  -9    5.20    2.90
  -9  -1  -9   -2.60    2.70
  -9   1   9   -1.30    2.30
   9   1  -9    0.60    2.30
   9  -1   9    1.40    2.90
  -9   1  -9    3.00    3.50
   9  -1  -9    2.40    2.70
  -9   1  -9    6.50    4.80
   9   1   9    3.90    2.90
   9  -1  -9    1.90    2.90
   9   1 -10    2.70    3.10
  -9   1  10    1.60    3.40
   9  -1  10    4.70    3.40
  -9  -1 -10    7.50    4.40
  -9  -1 -10   -0.20    3.40
   9   1 -10    4.80    3.30
   9  -1 -10    4.50    3.50
   9   1  10    3.10    2.90
   9  -1 -10    3.50    3.10
  -9   1 -10    6.80    4.20
  -9   1 -10   10.90    5.00
  -9  -1 -11   20.80    5.80
   9  -1  11   31.90    6.40
   9   1 -11   28.30    5.80
  -9  -1 -11   40.30    8.90
   9   1  11   29.80    5.90
  -9   1 -11   33.40    8.30
  -9   1 -11   28.70    6.10
   9  -1 -11   28.40    5.90
  -9  -1 -12   32.00    6.50
  -9  -1 -12    6.20    4.90
   9   1 -12   16.80    5.10
   9  -1  12   17.30    5.20
   9   1  12   21.00    5.50
  -9   1 -12    4.60    4.60
  -9   1 -12   30.90    7.50
   9  -1 -12   18.30    5.10
 -10   1   0   49.30   10.00
  10  -1   0   48.50    5.60
  10   1   0   50.79    4.90
  10   1   0   60.49    5.70
 -10  -1   0   44.60    5.00
 -10  -1   0   48.60    9.80
 -10   1   0   49.40    6.10
  10  -1   0   61.29    5.50
  10  -1   1   36.20    4.60
  10   1  -1   34.10    4.70
 -10  -1  -1   40.40    4.90
 -10  -1  -1   47.20    9.30
 -10   1   1   46.80    9.00
  10   1  -1   29.50    4.00
  10  -1   1   36.40    6.00
  10  -1   1   46.10    5.00
 -10   1   1   35.60    5.00
 -10   1  -1   38.90    9.10
 -10   1  -1   38.20    5.30
 -10  -1   1   34.20    4.20
 -10   1  -1   32.90    5.20
  10   1   1   42.80    4.90
  10   1   1   42.20    4.30
 -10  -1   1   27.90    8.10
  10  -1  -1   44.00    5.10
  10  -1  -1   39.10    5.10
  10  -1   2    4.30    2.00
  10  -1   2    2.60    3.50
 -10   1   2    2.90    2.30
 -10  -1  -2    1.20    5.60
  10  -1   2    6.40    2.60
  10   1  -2    3.20    2.40
 -10  -1  -2    4.20    3.00
  10   1  -2    3.30    2.30
 -10   1   2   10.30    5.70
 -10   1  -2    8.40    6.70
  10  -1  -2    4.10    2.90
 -10   1  -2    3.90    3.10
  10   1   2    3.50    2.00
 -10  -1   2    5.90    2.10
 -10   1  -2    3.00    2.60
  10  -1  -2    2.60    2.00
 -10  -1   2    2.60    5.10
  10   1   2    5.40    2.10
  10  -1   3    3.70    2.60
  10  -1   3    5.00    2.30
 -10  -1  -3    5.80    3.10
  10  -1   3   -5.30    4.90
  10   1  -3    1.90    2.20
 -10   1   3    5.20    2.60
 -10  -1  -3    5.40    7.50
 -10   1   3    7.40    6.00
  10   1  -3    6.40    2.60
 -10   1  -3    6.40    7.50
  10  -1  -3    6.70    3.00
 -10  -1   3    5.60    5.20
  10   1   3    2.80    2.00
 -10  -1   3    2.00    1.80
  10  -1  -3    1.00    2.10
 -10   1  -3    6.50    3.50
  10   1   3    4.60    2.10
 -10   1   4   98.09    8.40
 -10  -1  -4   97.59    8.50
  10   1  -4   98.39    8.60
 -10  -1  -4  102.09   15.30
  10  -1   4   97.99    7.70
  10   1  -4   98.89    8.10
  10  -1   4   91.79    8.20
  10   1   4   98.19    7.70
 -10   1  -4   91.99    8.70
 -10   1  -4   84.19   14.50
  10   1   4   89.19    7.80
  10  -1  -4  104.19    8.70
 -10  -1   4   85.69    7.70
  10  -1  -4   97.99    8.50
  10   1  -5   34.60    5.20
 -10  -1  -5   34.90    5.30
  10  -1   5   33.70    4.20
 -10   1   5   31.70    5.00
 -10  -1  -5   27.00    9.80
  10  -1   5   36.10    5.10
  10   1  -5   35.30    4.90
 -10   1   5   27.80    4.80
  10   1   5   29.90    4.40
 -10   1  -5   39.60   10.60
  10  -1  -5   28.70    5.10
  10   1   5   30.40    4.20
 -10   1  -5   38.70    5.90
 -10  -1   5   34.80    4.80
  10  -1  -5   34.30    5.00
 -10  -1  -6   22.60    4.50
  10  -1   6   12.80    3.60
 -10   1   6   15.90    3.90
 -10  -1  -6   10.30    7.50
  10   1  -6   19.30    3.90
  10   1  -6   20.90    4.30
  10   1   6   12.70    3.40
 -10   1  -6   17.30    4.50
  10  -1  -6   23.70    4.40
 -10   1  -6   27.50    8.90
 -10  -1   6   14.80    3.60
  10  -1  -6    8.10    3.10
 -10  -1  -7   13.40    7.00
 -10  -1  -7   11.50    3.90
  10   1  -7   11.90    3.50
  10  -1   7   13.90    3.80
  10   1  -7   20.30    4.10
 -10   1   7    4.50    2.90
 -10  -1   7   22.80    4.30
  10  -1  -7   15.00    4.00
 -10   1  -7   19.60    4.90
  10   1   7   15.40    3.60
  10  -1  -7    9.30    3.60
 -10   1  -7   23.80    8.90
  10   1  -8   13.60    4.00
 -10   1   8   17.50    4.60
 -10  -1  -8   28.40    5.30
  10  -1   8   15.80    4.20
 -10  -1  -8   19.50    8.10
  10   1  -8   14.20    4.10
 -10  -1   8   14.20    3.90
  10  -1  -8   25.50    5.00
 -10   1  -8   11.20    4.40
 -10   1  -8    7.30    6.20
  10  -1  -8   20.60    4.30
  10   1   8   15.60    3.90
  10  -1   9    9.50    3.80
 -10  -1  -9    9.70    4.30
 -10  -1  -9   14.80    6.40
  10   1  -9    7.90    3.60
 -10   1   9   11.70    4.10
  10   1  -9    9.30    3.70
  10  -1  -9   12.40    4.40
  10  -1  -9    2.20    3.20
  10   1   9    9.10    3.70
 -10   1  -9    9.00    4.30
 -10   1  -9   15.30    7.10
  10  -1  10    6.20    3.60
 -10  -1 -10   -0.60    3.70
  10   1 -10    1.10    3.10
  10   1 -10    1.50    2.80
 -10  -1 -10   10.30    4.90
 -10   1  10   -6.80    2.20
 -10   1 -10    3.60    4.50
  10   1  10    3.50    3.40
 -10   1 -10    0.10    3.60
  10  -1 -10    4.00    3.60
  10  -1 -10    0.10    3.10
  10  -1  11    7.80    4.30
  10   1 -11    6.30    3.80
 -10  -1 -11   17.90    6.00
 -10  -1 -11    8.20    4.90
  10   1  11    9.80    4.30
 -10   1 -11   12.00    5.10
  10  -1 -11    6.10    4.10
 -10   1 -11    1.40    4.20
 -11  -1   0   24.20    3.80
 -11   1   0   17.70    4.00
  11   1   0   19.90    3.90
 -11   1   0   23.50    7.70
  11  -1   0   14.50    3.40
  11  -1   0   16.80    3.80
  11   1   0   22.50    3.40
 -11  -1   0   22.40    8.00
  11   1  -1   28.00    4.50
  11   1  -1   39.50    4.40
 -11   1   1   28.90    8.30
 -11  -1  -1   22.30    4.10
  11  -1   1   38.30    4.80
 -11   1   1   29.10    4.80
 -11  -1  -1   19.30    7.70
  11  -1   1   41.80    5.10
 -11  -1   1   35.50    4.30
  11  -1  -1   30.70    4.60
 -11   1  -1   33.20    9.10
  11   1   1   27.40    4.30
  11  -1  -1   20.50    4.00
 -11   1  -1   40.00    5.60
 -11  -1   1   41.70    9.50
  11   1   1   31.30    3.90
  11  -1   2   67.89    6.40
 -11   1   2   50.49   10.20
 -11  -1  -2   74.09   12.90
  11   1  -2   76.49    6.50
 -11   1   2   67.79    6.60
  11  -1   2   83.09    7.00
 -11  -1  -2   60.19    6.60
  11   1  -2   72.39    7.00
  11   1   2   68.19    5.90
 -11   1  -2   71.09   13.20
  11  -1  -2   62.79    6.50
 -11  -1   2   60.59   10.60
 -11  -1   2   66.99    6.00
  11  -1  -2   63.59    6.70
  11   1   2   60.99    6.90
 -11   1  -2   53.79    7.10
 -11  -1  -3   63.29    6.90
  11   1  -3   49.30    5.70
 -11   1   3   54.99    5.90
  11   1  -3   44.70    6.30
 -11  -1  -3   62.89   12.50
 -11   1   3   57.89   11.10
  11  -1   3   54.49    5.60
  11  -1   3   55.39    6.20
  11  -1  -3   57.89    6.70
 -11   1  -3   54.09    6.80
 -11  -1   3   45.90   10.00
 -11   1  -3   48.40   11.30
 -11  -1   3   49.10    5.20
  11  -1  -3   57.59    6.40
  11   1   3   59.59    5.50
  11   1   3   56.99    5.60
 -11   1   4   59.79    6.60
 -11   1   4   58.09   10.70
 -11  -1  -4   76.49   14.20
  11   1  -4   73.79    6.70
  11   1  -4   76.29    7.40
  11  -1   4   73.19    7.00
 -11  -1  -4   59.39    7.00
  11  -1   4   65.19    6.30
 -11   1  -4   75.69   13.90
  11  -1  -4   66.39    6.90
 -11  -1   4   79.39   12.30
 -11  -1   4   74.39    6.40
  11  -1  -4   74.09    8.20
 -11   1  -4   71.39    7.40
  11   1   4   67.59    6.40
  11   1   4   66.99    6.30
  11   1  -5   17.20    3.60
  11   1  -5   18.20    4.00
 -11  -1  -5   18.80    4.00
  11  -1   5   15.80    3.10
  11  -1   5   16.60    3.90
 -11  -1  -5   10.00    7.40
 -11   1   5   12.50    3.40
  11   1   5   18.40    3.40
  11  -1  -5   15.40    3.90
  11   1   5   17.20    3.50
 -11   1  -5   17.00    9.20
 -11  -1   5   21.80    3.80
 -11   1  -5   16.00    4.50
  11  -1  -5   10.60    3.70
  11  -1   6   22.10    4.40
 -11   1   6   27.10    4.90
  11   1  -6   33.10    5.20
 -11  -1  -6   17.50    8.40
 -11  -1  -6   28.40    5.20
  11   1  -6   24.10    4.30
  11   1   6   23.20    4.20
 -11   1  -6   17.00    4.60
  11  -1  -6   23.90    4.80
 -11  -1   6   20.30    4.10
  11  -1  -6   26.70    4.60
 -11   1  -6   16.90    9.20
  11  -1   7    7.30    3.50
 -11  -1  -7   13.90    8.10
  11   1  -7    6.50    3.20
 -11   1   7   13.20    4.00
 -11  -1  -7   11.00    4.30
  11   1  -7   15.50    4.40
 -11   1  -7   10.80    4.30
 -11  -1   7    7.20    3.20
  11   1   7   14.20    3.70
 -11   1  -7   11.90    7.50
  11  -1  -7   13.20    3.80
  11  -1  -7   12.00    3.90
  11  -1   8   16.80    4.30
  11   1  -8    7.10    3.80
 -11  -1  -8   15.00    4.60
 -11  -1  -8    9.30    6.90
 -11   1   8    9.60    3.60
  11   1  -8   10.60    3.90
  11  -1  -8    8.90    3.70
 -11   1  -8    9.60    4.60
 -11  -1   8    9.00    3.60
 -11   1  -8   17.70    8.20
  11   1   8    7.70    3.30
  11  -1  -8   10.80    4.00
 -11  -1  -9   11.00    6.60
  11   1  -9    6.10    3.60
 -11  -1  -9    5.70    4.00
  11   1  -9   12.90    4.00
  11  -1   9    5.20    3.60
 -11   1   9    9.30    4.00
 -11   1  -9    5.80    5.80
  11  -1  -9    6.90    3.40
  11   1   9    5.90    3.40
 -11   1  -9    1.60    4.10
  11  -1  -9   11.90    4.30
 -11  -1 -10   18.50    5.30
 -11   1  10    9.90    4.90
 -11  -1 -10   28.00    8.00
  11  -1  10    4.00    3.70
  11   1 -10    7.10    4.30
  11   1 -10   19.00    5.20
 -11   1 -10   22.50    7.70
  11  -1 -10   18.90    5.10
 -11   1 -10   13.00    5.10
  11   1  10   14.00    4.60
  11  -1 -10    7.00    4.10
  12   1   0  165.88   13.00
  12  -1   0  175.48   12.90
  12  -1   0  166.08   13.00
 -12   1   0  196.38   19.40
  12   1   0  173.58   12.20
 -12  -1   0  154.58   17.50
 -12  -1   0  172.58   12.60
 -12   1   0  163.18   13.10
  12  -1   1   11.40    3.10
 -12  -1  -1   15.70    3.40
  12   1  -1    9.60    2.80
 -12   1   1    6.80    7.10
  12   1  -1   12.40    3.50
 -12   1   1    7.90    3.10
 -12  -1  -1   14.00    7.30
  12  -1   1   17.60    3.60
  12   1   1   11.90    2.80
 -12  -1   1   16.80    3.00
 -12   1  -1   15.00    7.70
  12   1   1   13.70    3.30
 -12   1  -1   12.20    3.80
  12  -1  -1   12.10    3.60
 -12  -1   1   16.00    7.10
  12  -1  -1   10.20    3.10
  12  -1   2   54.29    6.10
  12   1  -2   45.70    5.40
 -12   1   2   44.00   10.10
 -12  -1  -2   43.40   10.70
  12   1  -2   52.99    6.50
 -12   1   2   51.89    6.20
 -12  -1  -2   50.09    6.20
  12  -1   2   38.00    5.60
 -12   1  -2   53.99   12.30
  12   1   2   49.50    5.20
  12   1   2   51.29    6.20
 -12  -1   2   51.89    5.00
 -12  -1   2   47.60   10.50
  12  -1  -2   40.90    5.90
 -12   1  -2   50.89    6.80
  12  -1  -2   43.10    5.90
  12   1  -3   15.30    3.80
  12   1  -3    8.10    3.00
  12  -1   3   10.10    3.30
 -12  -1  -3    8.50    3.40
  12  -1   3    9.10    2.80
 -12   1   3    5.50    2.70
 -12  -1  -3    5.00    6.90
 -12   1   3    9.10    6.20
 -12   1  -3   13.50    8.20
 -12   1  -3   10.90    3.90
  12  -1  -3   13.30    3.70
  12  -1  -3   10.60    3.40
  12   1   3    6.50    2.60
 -12  -1   3   14.50    2.90
  12   1   3    9.50    3.00
 -12  -1   3    8.10    6.50
  12  -1   4   -0.20    2.10
  12   1  -4   -0.90    2.40
  12  -1   4   -1.70    2.20
 -12   1   4    0.70    5.10
 -12  -1  -4    0.20    3.00
 -12  -1  -4   -1.40    6.30
  12   1  -4   -2.80    2.50
 -12   1   4    3.80    2.40
 -12   1  -4   -9.40    6.20
  12   1   4    0.30    2.10
  12  -1  -4    3.60    3.00
 -12  -1   4    2.60    1.90
  12  -1  -4   -1.10    2.70
 -12   1  -4    2.60    3.30
 -12  -1   4    2.30    5.50
  12   1   4    2.50    2.30
  12  -1   5   12.90    3.60
 -12   1   5    8.10    3.30
 -12   1   5   10.50    6.10
  12   1  -5   12.00    3.40
 -12  -1  -5   -3.90    6.40
  12   1  -5    6.50    3.30
 -12  -1  -5    6.80    3.70
 -12  -1   5   10.50    3.00
 -12   1  -5    7.80    8.40
  12  -1  -5   17.50    3.90
  12  -1  -5    8.10    3.30
  12   1   5    9.00    3.00
 -12   1  -5   10.50    4.20
  12   1  -6   71.79    7.10
  12  -1   6   79.79    7.50
  12   1  -6   59.59    8.00
 -12   1   6   63.79    7.80
 -12  -1  -6   66.69    8.00
 -12  -1  -6   56.79   13.40
 -12  -1   6   71.49    6.80
  12  -1  -6   57.49    7.40
  12  -1  -6   55.19    7.60
 -12   1  -6   82.19   15.20
  12   1   6   56.49    6.90
 -12   1  -6   62.09    8.30
 -12  -1  -7    3.80    7.40
 -12  -1  -7    0.20    3.30
  12   1  -7    5.50    3.10
  12  -1   7    3.60    3.40
  12   1  -7    3.50    3.20
 -12   1   7    8.60    3.50
  12  -1  -7   10.10    3.80
 -12  -1   7    8.20    3.30
  12   1   7    7.30    3.20
  12  -1  -7    5.80    3.40
 -12   1  -7    5.40    7.00
 -12   1  -7    9.30    4.00
  12  -1   8    3.90    3.50
 -12  -1  -8    3.20    3.80
 -12  -1  -8   10.80    7.60
 -12   1   8   11.10    3.70
  12   1  -8    4.10    3.20
  12   1  -8    6.60    3.50
  12  -1  -8    2.30    3.20
  12   1   8    3.70    3.30
 -12  -1   8   10.70    3.50
  12  -1  -8    3.50    3.40
 -12   1  -8   11.20    7.70
 -12   1  -8    2.70    3.90
  12  -1   9   15.90    4.70
 -12  -1  -9   30.00    9.20
 -12  -1  -9   13.60    5.20
  12   1  -9   21.70    4.90
  12   1  -9   15.80    5.10
 -12   1   9   23.80    5.40
  12  -1  -9   28.30    5.40
 -12   1  -9   21.60    5.70
 -12   1  -9   20.50    8.70
  12  -1  -9   10.10    4.50
  12   1   9   18.00    4.60
 -12   1  10   61.59    8.70
 -12  -1 -10   61.29   12.00
  12   1 -10   45.20    7.40
 -12  -1 -10   39.20    7.60
  12  -1  10   42.00    7.50
  12   1 -10   46.00    7.20
  12   1  10   48.00    7.60
 -12   1 -10   33.60    7.70
 -12   1 -10   51.49   11.30
  12  -1 -10   47.10    7.70
  12  -1 -10   49.40    7.60
 -13  -1   0    4.60    2.30
 -13   1   0   -1.30    6.10
  13  -1   0   -2.00    2.60
  13   1   0    5.60    2.80
 -13  -1   0   -1.50    5.70
  13  -1   0    4.80    2.80
 -13   1   0    6.70    3.30
  13   1   0    3.40    2.40
 -13  -1  -1   30.40    9.50
 -13  -1  -1   32.60    4.60
 -13   1   1   35.60   10.40
  13  -1   1   22.30    4.50
  13  -1   1   29.20    4.70
 -13   1   1   29.90    4.80
  13   1  -1   22.90    3.90
  13   1  -1   29.70    4.90
 -13  -1   1   30.20    4.30
 -13  -1   1   22.40    8.90
 -13   1  -1   28.80    5.20
  13   1   1   42.10    4.60
  13  -1  -1   32.60    5.10
 -13   1  -1   21.90    9.40
  13  -1  -1   25.70    4.90
  13   1   1   37.60    5.40
  13   1  -2   25.50    4.70
  13   1  -2   25.30    4.20
  13  -1   2   29.10    4.60
 -13   1   2    7.30    7.60
 -13  -1  -2   20.10    4.30
 -13   1   2   24.60    4.50
  13  -1   2   26.80    4.80
 -13  -1  -2   14.20    9.30
 -13  -1   2   23.50    3.80
  13  -1  -2   20.30    4.50
  13  -1  -2   23.40    4.60
  13   1   2   25.50    4.60
 -13   1  -2   27.80    5.30
 -13   1  -2   18.60    9.80
 -13  -1   2   30.40    9.40
  13   1   2   24.70    3.70
 -13   1   3    5.80    2.80
  13  -1   3    2.50    2.70
  13   1  -3    2.00    2.80
 -13  -1  -3    3.70    8.00
  13   1  -3    4.30    2.60
 -13   1   3    0.80    6.50
 -13  -1  -3    8.30    3.40
  13  -1   3    1.40    2.40
  13   1   3    1.50    2.80
  13   1   3    8.10    2.60
  13  -1  -3    0.30    2.80
  13  -1  -3    3.70    3.30
 -13   1  -3    6.40    3.80
 -13  -1   3    5.80    2.20
 -13  -1   3    3.80    6.40
 -13   1  -3   -2.00    8.30
 -13  -1  -4   11.20    4.30
  13   1  -4   16.70    3.90
  13  -1   4   13.60    3.80
 -13  -1  -4   12.90    9.00
  13  -1   4   11.30    3.40
 -13   1   4   11.10    3.50
  13   1  -4   10.50    4.00
 -13   1   4    9.10    6.70
  13  -1  -4   15.40    4.30
  13   1   4   16.80    3.70
  13   1   4    9.60    3.20
 -13  -1   4   19.70    3.50
 -13   1  -4   13.20    9.80
  13  -1  -4   19.00    4.40
 -13  -1   4   19.60    8.10
 -13   1  -4   18.50    4.90
 -13   1   5    2.50    2.60
  13   1  -5   -2.30    2.60
 -13   1   5   -0.40    6.30
 -13  -1  -5    5.50    8.70
  13  -1   5    0.20    2.70
 -13  -1  -5    2.20    3.50
  13   1  -5    0.80    2.80
 -13   1  -5    1.80    8.80
  13   1   5    5.20    2.90
 -13   1  -5   -1.00    3.10
  13  -1  -5    6.30    3.60
 -13  -1   5    9.40    6.00
  13  -1  -5    0.30    2.90
 -13  -1   5    2.20    2.10
  13  -1   6   14.20    4.20
 -13  -1  -6   11.20    4.20
 -13   1   6   18.90    4.30
  13   1  -6   24.80    4.40
  13   1  -6    9.80    4.30
 -13  -1  -6    9.50    9.60
 -13   1   6   13.10    6.90
  13   1   6   12.40    3.50
 -13   1  -6    9.10    9.00
 -13   1  -6   18.30    5.10
  13  -1  -6   11.20    4.10
  13  -1  -6    8.20    3.80
 -13  -1   6   19.30    3.90
 -13  -1   6   16.30    7.00
  13  -1   7   15.30    4.50
 -13  -1  -7   12.50    9.10
  13   1  -7   23.60    4.60
  13   1  -7   11.20    4.40
 -13   1   7   17.00    4.30
 -13  -1  -7   14.40    4.80
  13  -1  -7   16.10    4.60
 -13   1  -7   19.20    5.20
 -13  -1   7   19.70    4.30
  13  -1  -7   11.10    4.50
  13   1   7   12.00    3.70
 -13   1  -7    7.90    9.10
 -13  -1  -8   30.30   10.20
 -13   1   8   39.60    6.60
  13   1  -8   57.09    7.80
  13  -1   8   41.50    6.80
  13   1  -8   36.10    6.00
 -13  -1  -8   34.90    6.70
 -13   1  -8   49.90   12.10
  13  -1  -8   45.70    6.90
  13  -1  -8   44.40    7.30
 -13   1  -8   39.10    7.30
  13   1   8   42.10    6.20
 -13  -1   8   39.80    6.30
 -13   1   9   20.50    5.10
 -13  -1  -9    1.70    4.10
  13   1  -9   10.40    4.20
 -13  -1  -9    5.70    7.00
  13  -1   9    5.80    3.90
  13   1  -9   13.30    5.10
 -13   1  -9   10.10    7.20
 -13   1  -9    0.70    4.30
  13  -1  -9    5.40    4.40
  13   1   9    8.30    4.10
  13  -1  -9   13.90    4.80
 -14  -1   0    4.10    6.80
  14  -1   0   -2.10    2.80
 -14   1   0    0.90    2.40
 -14  -1   0    9.00    2.60
  14   1   0   -0.80    2.90
  14  -1   0    1.80    2.80
 -14   1   0    0.80    7.90
  14   1   0   -1.30    2.20
  14  -1   1    3.80    2.90
  14   1  -1    2.90    2.80
 -14   1   1   10.70    3.10
 -14  -1  -1   14.90    3.30
 -14   1   1   11.20    8.50
 -14  -1  -1   12.10    8.70
  14  -1   1    7.50    3.50
  14   1  -1    9.30    3.50
  14   1   1    8.20    2.80
  14  -1  -1    4.20    3.10
  14   1   1    3.10    2.80
 -14  -1   1   13.60    8.10
 -14   1  -1   15.10    3.90
 -14   1  -1   18.70   10.00
  14  -1  -1    6.80    3.60
 -14  -1   1   15.10    3.10
  14  -1   2    4.50    3.20
 -14  -1  -2   -2.90    6.80
 -14   1   2    4.90    2.60
 -14  -1  -2    9.80    3.10
  14  -1   2    6.40    3.30
  14   1  -2    5.40    3.00
 -14   1   2    6.10    7.90
  14   1  -2    4.00    3.50
 -14  -1   2   10.80    2.70
 -14  -1   2    5.00    7.50
  14  -1  -2    2.50    3.40
  14  -1  -2    5.30    3.50
  14   1   2    3.20    3.00
 -14   1  -2   16.40    4.30
 -14   1  -2   -0.60    7.20
  14   1   2    2.90    2.30
 -14   1   3    9.50    3.10
 -14  -1  -3   10.70    3.40
  14  -1   3    0.50    2.50
  14  -1   3    0.40    2.70
  14   1  -3    3.00    3.30
 -14  -1  -3    4.10    8.70
  14   1  -3    0.90    2.80
 -14   1   3   -5.60    6.90
 -14  -1   3    0.90    6.20
  14   1   3    2.00    2.40
  14  -1  -3    1.80    3.20
  14  -1  -3    1.00    2.70
 -14   1  -3    0.40    8.50
  14   1   3   -0.10    2.70
 -14  -1   3    2.10    2.10
 -14   1  -3    7.00    3.80
 -14   1   4   10.30    3.20
  14  -1   4    8.50    3.40
  14   1  -4    5.80    3.50
 -14   1   4    9.60    7.70
  14  -1   4    5.60    3.60
 -14  -1  -4    2.80    3.40
  14   1  -4    9.50    3.40
 -14  -1  -4    5.40    9.50
  14  -1  -4    4.90    3.50
 -14  -1   4    6.40    2.70
 -14  -1   4    4.00    6.70
 -14   1  -4    0.80    3.40
  14   1   4    6.00    2.80
 -14   1  -4    3.40    8.20
  14   1   4    9.00    3.50
  14  -1  -4    5.00    3.70
  14  -1   5    0.00    3.00
 -14  -1  -5    7.10    8.90
 -14   1   5   -1.70    2.00
  14   1  -5    4.50    3.70
 -14  -1  -5    6.40    3.80
  14   1  -5    5.70    3.20
 -14   1   5   -2.70    5.60
  14   1   5    5.00    3.10
 -14   1  -5    5.20    4.10
 -14  -1   5   11.20    3.00
 -14   1  -5   -0.20    8.70
  14  -1  -5    4.40    3.60
  14  -1  -5    3.50    3.50
 -14  -1   5    6.70    7.10
 -14  -1  -6    4.20    3.70
 -14   1   6   -2.10    6.60
  14   1  -6    0.90    3.80
  14   1  -6    7.10    3.50
  14  -1   6    0.80    3.10
 -14  -1  -6    3.30    8.00
 -14   1   6    9.80    3.30
  14  -1  -6    4.30    3.90
  14   1   6    5.80    3.10
 -14  -1   6   13.30    7.70
 -14   1  -6    2.20    4.00
 -14   1  -6    6.20    9.40
  14  -1  -6    1.30    3.80
 -14  -1   6   10.00    3.10
 -14  -1  -7   30.80    6.10
  14   1  -7   31.10    5.30
 -14   1   7   36.50    5.70
  14  -1   7   22.00    5.40
 -14  -1  -7   24.70   11.10
  14   1  -7   18.10    5.20
 -14   1   7   25.60    8.80
 -14   1  -7   30.30   10.80
  14  -1  -7   19.90    5.20
 -14   1  -7   28.10    5.90
 -14  -1   7   17.00    4.30
 -14  -1   7   35.10   10.10
  14  -1  -7   35.50    6.40
  14   1   7   22.90    4.80
 -14  -1  -8   16.40    5.60
 -14   1   8   19.10    5.00
  14  -1   8   11.20    4.70
 -14  -1  -8   37.00   11.70
  14   1  -8   18.00    4.60
  14   1  -8   12.30    5.10
 -14   1   8   40.90   10.60
  14  -1  -8   24.30    5.60
  14  -1  -8   14.20    5.50
 -14   1  -8    7.50    5.10
  14   1   8   20.00    4.90
 -14  -1   8   18.90    4.60
 -14   1  -8   17.50    9.50
 -15   1   0   12.90    9.60
  15  -1   0    9.80    3.60
  15   1   0   14.00    4.20
 -15  -1   0    4.30    8.60
 -15   1   0   16.60    4.00
  15  -1   0   14.80    4.30
  15  -1   1   38.70    6.10
 -15   1   1   43.70   11.90
  15   1  -1   32.00    5.80
 -15  -1  -1   47.10   12.80
  15  -1   1   37.60    5.50
 -15   1   1   44.20    5.90
 -15   1  -1   34.80   12.70
  15  -1  -1   39.50    5.80
  15  -1  -1   35.70    6.10
 -15   1  -1   38.20    5.90
 -15  -1   1   40.80   12.10
  15   1   1   45.70    6.40
  15  -1   2    8.50    3.50
 -15  -1  -2   15.70   10.50
 -15   1   2   15.20    3.70
 -15   1   2   12.90    8.80
  15  -1   2   11.40    3.80
  15   1  -2   11.00    4.00
 -15   1  -2    6.50    3.80
  15   1   2   10.20    3.80
  15   1   2    2.80    3.20
 -15   1  -2   13.10   11.00
  15  -1  -2   13.60    4.20
  15  -1  -2   13.10    4.20
 -15  -1   2   12.20    8.50
  15   1  -3    2.80    3.10
 -15   1   3    4.80    8.10
  15  -1   3   10.30    3.90
 -15   1   3   16.70    3.60
 -15  -1  -3    2.00    8.10
 -15  -1  -3    3.70    3.30
  15  -1   3    8.90    3.50
  15  -1  -3    7.30    3.90
  15   1   3    6.90    3.60
  15  -1  -3    9.10    3.90
  15   1   3    1.90    2.60
 -15  -1   3    6.90    8.10
 -15   1  -3   -6.10    8.70
 -15   1  -3    8.80    3.90
 -15   1   4   12.50    8.90
  15   1  -4    3.50    3.80
 -15   1   4    1.30    2.50
 -15  -1  -4   -4.90    8.40
  15  -1   4    2.50    3.30
 -15  -1  -4    7.50    3.90
  15   1   4    7.40    2.90
 -15   1  -4   -7.50    8.80
  15  -1  -4    7.40    4.20
 -15   1  -4    0.10    3.40
 -15  -1   4    7.20    8.10
  15  -1  -4    1.40    3.70
 -15   1   5    2.70    2.70
  15  -1   5   -0.90    3.10
 -15   1   5    3.00    7.90
 -15  -1  -5    5.90    3.80
  15   1  -5    2.70    3.80
 -15  -1  -5    2.80    9.80
  15  -1  -5    1.80    3.40
 -15   1  -5    5.30    9.90
 -15  -1   5   11.10    8.10
  15  -1  -5    5.70    4.00
 -15   1  -5    6.60    4.10
  15   1   5    3.60    2.80
 -15  -1  -6    1.40    8.30
 -15  -1  -6   -1.90    3.70
 -15   1   6    6.20    3.00
 -15   1   6    2.40    7.90
  15   1  -6   -0.20    3.30
  15  -1   6    3.90    3.60
  15  -1  -6    1.40    3.90
 -15   1  -6   -1.70    9.20
  15   1   6    1.20    3.00
 -15   1  -6   -2.60    3.70
  15  -1  -6    3.90    4.20
 -15  -1   6    7.00    8.40
 -15   1   7    5.80    8.50
 -15  -1  -7   -0.80    3.80
 -15   1   7    7.30    3.70
 -15  -1  -7   10.00    9.50
  15   1  -7    3.50    4.50
  15  -1   7    7.60    4.30
  15  -1  -7    8.70    4.80
 -15   1  -7    7.40   10.00
 -15  -1   7   12.60    8.90
  15   1   7   10.10    3.90
  15  -1  -7    5.50    4.00
 -15   1  -7    5.20    4.50
  16  -1   0   -6.50    2.90
 -16   1   0   15.20    3.80
 -16   1   0   -1.40    8.20
  16  -1   0    2.10    3.60
 -16  -1   0    1.00    8.90
  16   1   0    5.20    3.60
  16   1  -1    4.50    3.80
 -16  -1  -1   -8.60    7.90
 -16   1   1    6.10    2.80
  16  -1   1    0.40    3.10
  16  -1   1    4.30    3.80
 -16   1   1   -0.70    8.10
  16  -1  -1   -2.50    3.30
  16  -1  -1    4.30    3.60
 -16   1  -1    5.60    3.40
  16   1   1   -0.20    3.00
 -16  -1   1   -8.60    6.80
 -16   1  -1   -3.50    8.30
 -16   1   2   14.50    3.70
 -16  -1  -2   -2.90    9.20
 -16   1   2   -4.90    8.70
  16  -1   2    9.10    3.50
  16   1  -2   -0.70    2.90
  16  -1   2    1.40    2.90
 -16  -1   2    2.30    9.10
  16  -1  -2    1.60    3.10
 -16   1  -2    8.60    3.50
  16   1   2    6.90    3.90
 -16   1  -2   -0.10   10.90
  16  -1  -2   -2.80    3.40
  16  -1   3   -1.50    2.90
  16   1  -3    0.80    3.60
  16  -1   3    1.20    3.40
 -16  -1  -3   -1.10   10.00
 -16   1   3   -4.50    8.90
 -16   1   3    8.40    3.20
 -16   1  -3    7.40    3.70
  16  -1  -3   -0.50    3.50
  16   1   3   -0.80    3.40
 -16  -1   3    0.10    8.00
 -16   1  -3   -1.50    9.90
  16  -1  -3    1.60    3.50
  16  -1   4   -2.10    3.00
 -16   1   4    2.10    2.60
 -16   1   4    0.80    9.20
 -16  -1  -4    2.40   10.20
  16   1  -4   -1.60    3.00
  16  -1  -4   -4.60    3.30
 -16   1  -4   -5.20    9.20
  16  -1  -4    0.40    3.80
 -16   1  -4    5.20    4.10
 -16  -1   4    6.60    9.20
 -16   1   5    2.10    9.20
 -16   1   5   10.30    3.90
  16   1  -5    5.30    4.20
 -16  -1  -5    5.60   10.50
  16  -1   5   10.00    4.10
 -16  -1   5   16.30   10.30
  16  -1  -5   12.30    5.20
 -16   1  -5    7.30   10.80
  16  -1  -5    8.20    4.60
 -16   1  -5   10.00    4.50
  17   1   0   -0.30    4.00
 -17   1   0   -5.50    9.60
  17  -1   0    0.90    3.50
 -17  -1   0   -5.00    9.80
  17  -1   1   -1.50    3.10
  17   1  -1   -0.80    3.30
 -17  -1  -1    2.80   10.80
 -17   1   1   -4.20    9.70
 -17  -1   1    4.30   10.20
  17  -1  -1    1.70    3.50
  17   1   1    0.50    3.80
 -17   1  -1   -8.50   10.50
 -17  -1  -2  -12.50    9.30
  17   1  -2    0.00    4.00
 -17   1   2    5.60   10.60
  17  -1   2    4.30    3.90
  17  -1  -2   11.30    4.80
  17   1   2   -4.80    3.50
 -17   1  -2   -1.10   11.40
 -17  -1   2    0.70    8.60
  17   1  -3    9.30    4.60
  17  -1   3   17.50    5.20
 -17  -1  -3   13.00   12.00
 -17   1   3   12.70   11.60
 -17  -1   3    7.70   10.90
 -17   1  -3    4.20   12.80
  17   1   3    8.00    4.50
  17  -1  -3   17.30    5.00
   0  -2   0 1532.95   93.79
   0   2   0 1538.95   93.79
   0   2   0 1561.94   93.79
   0  -2   0 1483.05   93.69
   0   2   0 1500.45   93.69
   0  -2   0 1469.45   94.19
   0   2  -1 1481.15   89.29
   0   2   1 1372.26   89.89
   0   2   1 1397.26   89.29
   0  -2   1 1512.85   89.29
   0   2  -1 1500.35   89.59
   0  -2  -1 1405.16   89.29
   0   2  -1 1517.65   89.39
   0  -2  -1 1402.96   89.39
   0   2   1 1431.76   89.39
   0   2  -1 1444.16   89.79
   0   2   1 1396.76   89.39
   0   2   2   55.69    4.10
   0   2  -2   47.50    3.90
   0  -2  -2   53.29    4.00
   0   2  -2   44.70    4.00
   0  -2   2   43.80    3.90
   0   2  -2   49.40    4.70
   0   2   2   63.79    4.10
   0  -2  -2   67.19    4.40
   0  -2  -2   60.89    4.10
   0  -2   3    5.00    1.20
   0   2  -3    6.90    1.50
   0   2   3    2.60    1.10
   0   2  -3    4.60    1.10
   0   2   3    4.40    1.40
   0  -2  -3    4.40    1.20
   0  -2  -3    5.90    1.30
   0  -2  -3    5.00    1.50
   0   2  -3    5.80    2.00
   0   2  -4   86.59    8.50
   0  -2   4   84.69    7.10
   0   2   4  114.19    7.50
   0  -2  -4  114.69    8.40
   0  -2  -4  112.29    7.60
   0  -2  -4  109.69    7.50
   0   2  -4   82.69    7.20
   0   2   4  118.69    7.80
   0   2  -4   87.89    7.30
   0  -2  -5  232.08   16.60
   0   2   5  237.58   16.50
   0   2   5  235.68   16.80
   0   2  -5  248.28   16.70
   0   2  -5  262.77   16.70
   0  -2  -5  246.48   17.80
   0   2  -5  252.27   18.50
   0  -2  -5  243.78   16.60
   0  -2   5  250.17   16.50
   0   2  -6  110.49    9.20
   0   2  -6  107.89   10.80
   0  -2  -6  124.39    9.40
   0   2  -6  120.79    9.20
   0   2   6  125.39    9.20
   0  -2  -6  122.49   10.70
   0  -2  -6  127.79    9.30
   0  -2   6  111.49    9.10
   0  -2  -6  124.69    8.00
   0   2   6  126.89    9.50
   0  -2  -7  172.58   13.30
   0   2   7  187.98   13.30
   0  -2   7  178.78   13.10
   0   2  -7  175.28   15.50
   0   2  -7  176.78   13.40
   0  -2  -7  182.38   15.10
   0   2  -7  182.48   13.40
   0  -2  -7  187.38   11.80
   0  -2  -7  184.38   13.30
   0  -2   8   13.50    3.30
   0   2  -8   24.90    4.20
   0   2  -8   20.10    4.20
   0  -2  -8   31.10    3.10
   0  -2  -8   27.20    4.40
   0  -2  -8   24.60    4.10
   0   2   8   20.40    3.70
   0  -2  -8   28.90    6.30
   0   2  -8   20.00    5.50
   0  -2  -9   42.50    5.70
   0  -2  -9   41.10    5.80
   0   2   9   32.30    5.00
   0   2   9   26.50    3.80
   0   2  -9   24.80    6.90
   0  -2  -9   37.30    7.50
   0   2  -9   24.80    5.20
   0   2  -9   25.50    4.70
   0  -2   9   32.70    5.10
   0   2 -10   42.60    6.80
   0  -2 -10   47.90    6.60
   0   2 -10   38.70    8.40
   0  -2 -10   51.79    9.30
   0  -2  10   33.50    5.40
   0   2  10   42.60    5.90
   0  -2 -10   55.39    7.20
   0   2 -10   35.40    5.90
   0   2 -11   24.90    7.60
   0  -2  11   22.70    4.80
   0   2  11   26.80    5.00
   0  -2 -11   19.70    4.50
   0  -2 -11   28.80    6.00
   0  -2 -11   25.70    6.90
   0   2 -11   24.30    5.30
   0   2 -11   31.50    5.20
   0  -2 -12   19.70    6.60
   0  -2 -12   19.50    5.40
   0  -2 -12   17.60    4.40
   0  -2  12   11.70    4.00
   0   2 -12    2.80    4.10
   0   2 -12   14.20    4.10
   0   2 -12   12.30    4.40
   0   2  12   14.00    4.00
   0   2 -13    0.30    3.70
   0  -2 -13    0.70    3.70
   0   2  13    1.70    3.10
   0   2 -13    4.80    4.70
   0  -2 -13    2.10    3.30
   0  -2  13    5.80    3.90
   0   2 -13   -1.10    2.40
   0  -2 -13    1.80    3.00
   0   2 -14    8.30    4.10
   0  -2 -14   16.10    6.10
   0   2 -14    9.50    5.20
   0   2  14   11.70    4.40
   0   2 -14    7.70    5.40
   0  -2 -14   19.90    6.30
   0  -2 -14   14.40    4.90
   0  -2  14   14.50    4.80
   1   2   0 2822.62  174.38
  -1   2   0 2880.31  174.28
  -1   2   0 2797.72  174.28
  -1  -2   0 2826.92  174.08
   1   2   0 2791.42  174.98
  -1  -2   0 2840.62  174.38
  -1   2   0 2857.21  175.68
   1  -2   0 2771.42  174.18
  -1   2   0 2795.92  174.78
   1   2   0 2809.92  174.48
   1  -2   0 2806.02  174.28
   1   2  -1  409.96   26.90
  -1   2   1  437.66   27.20
  -1   2   1  434.26   27.20
  -1  -2  -1  419.26   27.00
   1   2  -1  425.36   27.70
   1  -2   1  428.46   27.20
   1   2  -1  452.85   27.10
  -1  -2  -1  434.56   27.30
   1   2  -1  438.56   27.00
  -1   2   1  455.05   27.40
   1   2  -1  423.86   27.00
  -1  -2  -1  438.96   27.00
  -1  -2   1  419.86   26.90
  -1   2  -1  413.96   27.20
   1  -2  -1  454.25   27.30
  -1   2  -1  427.16   27.20
  -1  -2   1  427.56   26.90
   1   2   1  439.66   27.20
   1   2   1  436.46   27.30
   1   2   1  427.96   27.00
   1   2   1  441.66   27.00
  -1   2  -1  419.06   27.80
   1  -2  -1  437.86   27.20
  -1  -2  -2 1086.29   69.79
   1   2  -2 1122.99   69.69
   1   2  -2 1092.49   70.79
  -1   2   2 1106.39   69.99
  -1   2   2 1095.19   69.79
  -1   2   2 1152.48   69.89
   1   2  -2 1151.08   69.59
  -1  -2  -2 1112.49   69.69
  -1  -2  -2 1110.29   70.09
   1  -2   2 1115.59   69.79
   1   2  -2 1182.28   69.29
   1   2  -2 1107.49   69.69
   1   2   2 1159.38   69.79
  -1   2  -2 1140.29   69.99
   1   2   2 1136.09   69.69
   1  -2  -2 1150.58   69.89
   1   2   2 1130.59   69.89
  -1   2  -2 1073.29   69.79
  -1  -2   2 1085.19   69.59
   1  -2  -2 1124.79   69.89
  -1   2  -2 1112.49   70.79
   1   2  -3   73.19    5.30
  -1  -2  -3   85.09    6.50
  -1   2   3   78.69    5.60
  -1  -2  -3   88.79    5.90
   1   2  -3   65.19    5.60
  -1   2   3   83.09    6.10
  -1   2   3   84.39    5.80
  -1  -2  -3   87.99    5.90
   1   2  -3   79.29    6.90
   1   2  -3   70.29    5.70
   1  -2   3   70.69    5.80
   1   2   3   83.19    5.80
  -1  -2   3   74.49    5.60
  -1   2  -3   68.39    6.80
   1   2   3   85.09    5.70
   1  -2  -3   84.69    6.50
  -1   2  -3   69.89    5.80
   1  -2  -3   88.09    5.90
   1   2   3   85.89    6.00
  -1   2  -3   69.69    5.80
   1  -2  -3   77.79    5.90
  -1   2   4   16.90    2.70
  -1  -2  -4   18.50    2.60
   1   2  -4   23.30    2.60
   1   2  -4   18.00    2.50
   1  -2   4   18.30    2.50
   1   2  -4   15.90    1.80
  -1  -2  -4   16.50    3.20
  -1  -2  -4   13.20    2.10
  -1   2   4   13.20    2.20
   1   2  -4   13.40    3.10
  -1   2  -4   20.80    2.70
   1  -2  -4   13.80    2.80
   1   2   4   16.70    2.20
   1  -2  -4   17.80    2.40
   1   2   4   18.40    2.60
   1   2   4   16.20    2.10
  -1   2  -4   20.10    2.60
   1  -2  -4   17.70    2.50
  -1  -2   4   17.50    2.30
  -1   2  -4   20.60    3.90
  -1   2   5  107.99    8.70
  -1  -2  -5  112.89    8.60
   1   2  -5  104.59    8.50
  -1  -2  -5  121.59    9.80
   1   2  -5  113.39   10.20
  -1   2   5  119.19    8.50
   1   2  -5  116.39    7.70
   1  -2   5  121.79    8.60
   1   2  -5  104.79    8.40
  -1  -2  -5  114.39    8.50
  -1   2  -5  112.89   10.20
   1  -2  -5  112.29    8.60
  -1  -2   5  111.89    8.40
   1  -2  -5  116.29    8.60
   1   2   5  118.89    8.50
  -1   2  -5  114.89    8.60
  -1   2  -5  108.59    8.60
   1   2   5  113.49    8.70
   1   2   5  120.89    8.20
   1  -2  -5  117.09    9.80
  -1  -2  -6  228.18   17.00
  -1  -2  -6  204.58   15.30
   1  -2   6  214.08   15.30
   1   2  -6  216.48   15.40
  -1   2   6  211.88   15.20
   1   2  -6  235.38   17.90
   1   2  -6  225.08   15.40
  -1   2   6  229.88   15.80
   1   2  -6  234.48   14.30
  -1  -2  -6  214.08   15.50
   1   2   6  218.18   14.80
  -1  -2   6  232.68   15.30
   1   2   6  207.08   15.20
   1  -2  -6  199.68   16.80
  -1   2  -6  226.28   17.70
   1  -2  -6  213.38   15.40
   1  -2  -6  215.88   14.30
   1  -2  -6  220.38   15.60
  -1   2  -6  243.58   15.70
  -1   2  -6  228.98   15.40
  -1  -2  -7    3.40    2.00
  -1   2   7    3.50    2.00
   1   2  -7    2.70    1.80
  -1  -2  -7    0.80    1.50
  -1   2   7    3.70    2.20
  -1  -2  -7    1.70    2.20
  -1  -2  -7    3.10    0.70
   1   2  -7   -1.60    1.70
   1   2  -7    7.30    2.60
   1  -2   7    0.50    1.90
   1   2  -7    1.10    1.00
   1   2   7    3.40    2.00
   1  -2  -7    0.00    1.90
  -1   2  -7    4.10    2.30
   1  -2  -7    3.60    2.00
   1  -2  -7    4.90    2.10
   1   2   7    3.70    1.50
  -1   2  -7    1.70    2.40
  -1  -2   7    1.80    1.70
   1  -2  -7    2.60    1.10
  -1   2  -7    2.90    1.80
   1   2  -8  166.18   15.60
  -1  -2  -8  161.98   14.60
   1  -2   8  179.18   12.90
  -1  -2  -8  175.18   13.00
   1   2  -8  164.78   13.00
  -1   2   8  162.78   12.70
   1   2  -8  170.18   11.10
   1   2  -8  178.78   13.00
  -1  -2  -8  156.58   12.90
   1   2   8  166.98   11.80
   1   2   8  154.78   12.60
  -1   2  -8  167.28   13.00
   1  -2  -8  170.68   15.00
   1  -2  -8  167.78   11.20
  -1   2  -8  162.18   15.30
   1  -2  -8  174.38   13.20
  -1  -2   8  176.58   12.70
   1  -2  -8  166.58   12.90
  -1   2  -8  171.28   12.90
   1   2  -9  105.19    9.00
  -1  -2  -9   94.29    8.80
   1  -2   9   94.99    8.80
  -1   2   9   92.59    8.40
  -1  -2  -9   95.29   10.70
   1   2  -9  101.69   11.70
   1   2  -9   96.29    8.70
  -1  -2  -9  103.09    8.90
   1  -2  -9   81.59    8.50
  -1   2  -9  102.89   11.30
   1  -2  -9   90.09    8.70
   1  -2  -9   88.49   10.60
  -1   2  -9  101.79    8.90
  -1  -2   9  101.89    8.70
   1   2   9   82.79    7.50
   1   2   9   85.39    8.30
  -1   2  -9  115.39    9.50
  -1  -2 -10   16.90    5.50
   1   2 -10   21.80    6.40
  -1  -2 -10   20.90    4.60
  -1   2  10   24.30    4.70
   1  -2  10   19.30    4.40
   1   2 -10   22.60    4.90
   1   2 -10   24.30    4.60
  -1  -2 -10   16.20    4.00
   1  -2 -10   19.00    4.60
  -1   2 -10   17.10    4.30
  -1   2 -10   21.30    6.60
   1  -2 -10   20.60    4.50
   1  -2 -10   23.10    6.50
  -1   2 -10   23.90    4.50
  -1  -2  10   15.90    3.70
   1   2  10   20.20    4.30
  -1   2  11   31.60    5.30
  -1  -2 -11   23.60    4.80
  -1  -2 -11   21.50    6.30
   1   2 -11   14.10    5.60
  -1  -2 -11   27.10    5.70
   1  -2  11   11.90    3.70
   1   2 -11   19.40    4.50
   1   2 -11   21.30    5.20
   1  -2 -11   20.60    5.10
   1  -2 -11   25.20    5.00
  -1   2 -11   14.70    4.50
  -1   2 -11   18.60    4.50
  -1  -2  11   17.40    4.10
  -1   2 -11   19.60    6.60
   1   2  11   23.30    4.90
   1  -2 -11   24.20    6.90
   1   2 -12    6.30    4.00
  -1  -2 -12    3.50    4.10
   1   2 -12    4.60    4.40
   1   2 -12    7.70    3.50
  -1   2  12    1.40    2.70
   1  -2  12   10.70    3.90
  -1  -2 -12   -0.40    3.30
  -1  -2 -12   10.80    3.40
  -1  -2  12    5.90    3.50
  -1   2 -12    5.20    3.90
   1   2  12    3.40    3.10
   1  -2 -12    0.90    2.80
  -1   2 -12    6.20    3.40
   1  -2 -12    2.00    3.40
  -1   2 -12    5.20    4.20
   1  -2 -12    9.20    3.70
   1  -2  13    1.40    2.90
   1   2 -13    4.80    4.80
   1   2 -13   -1.50    3.80
  -1   2  13    0.60    3.40
  -1  -2 -13    0.50    3.90
  -1  -2 -13    5.70    3.40
   1   2 -13    3.00    2.80
  -1  -2 -13    5.30    3.70
  -1   2 -13    3.90    3.20
  -1   2 -13    2.20    4.30
  -1  -2  13    6.00    3.50
   1   2  13    1.00    3.30
   1  -2 -13    3.40    4.10
   1  -2 -13    5.70    3.30
  -1   2 -13    2.00    3.60
   1  -2 -13   -1.00    3.70
  -1   2  14    7.40    4.00
   1   2 -14    5.40    3.30
  -1  -2 -14   24.50    7.20
  -1  -2 -14    6.10    4.20
   1  -2  14   12.40    4.60
   1   2 -14   15.40    6.00
  -1  -2 -14    9.00    4.80
   1   2 -14   12.30    6.30
  -1   2 -14   23.10    7.60
   1   2  14   12.80    4.60
   1  -2 -14    6.90    3.60
  -1   2 -14   11.10    4.10
  -1   2 -14    5.40    5.10
  -1  -2  14   13.70    4.60
   1  -2 -14   29.30    7.90
   1  -2 -14   13.30    5.70
   2   2   0  460.95   27.80
   2  -2   0  434.76   28.00
   2  -2   0  426.06   28.00
   2   2   0  446.56   28.00
  -2   2   0  442.56   28.60
  -2   2   0  448.16   28.00
   2  -2   1 3364.56  210.88
   2   2  -1 3431.76  210.28
   2  -2   1 3514.25  210.08
  -2  -2  -1 3424.26  211.68
  -2   2   1 3486.95  209.88
  -2   2   1 3297.77  210.78
  -2  -2  -1 3314.87  210.48
   2  -2   1 3492.95  209.98
  -2   2   1 3626.74  210.18
   2   2  -1 2864.41  209.78
   2   2  -1 3411.66  209.78
  -2  -2  -1 3290.87  210.78
  -2   2  -1 3483.85  210.98
   2   2   1 3288.47  209.88
   2  -2  -1 3440.36  209.98
  -2   2  -1 3383.86  209.88
  -2   2  -1 3406.96  210.08
   2   2   1 3378.06  210.08
   2   2   1 3452.45  210.88
   2   2   1 3386.16  210.68
   2  -2  -1 3506.95  209.98
  -2  -2   1 3421.76  209.98
  -2   2   2 1117.99   70.89
   2  -2   2 1117.69   70.39
  -2  -2  -2 1140.79   71.49
  -2  -2  -2 1112.19   70.49
  -2   2   2 1103.69   70.69
   2   2  -2 1145.39   70.39
   2  -2   2 1145.49   70.69
   2   2  -2 1136.09   70.49
  -2  -2  -2 1139.39   70.49
   2   2  -2 1165.08   70.49
  -2   2   2 1151.28   70.69
   2  -2  -2 1118.59   70.69
  -2   2  -2 1132.09   71.99
  -2  -2   2 1138.99   70.39
   2   2   2 1154.18   70.69
  -2   2  -2 1134.69   70.79
   2   2   2 1120.19   70.39
  -2   2  -2 1134.09   70.69
   2  -2   3   19.10    2.60
   2   2  -3   21.20    2.20
   2   2  -3   19.90    2.20
  -2   2   3   20.50    2.70
  -2  -2  -3   23.40    2.30
  -2  -2  -3   19.80    3.60
  -2  -2  -3   21.40    2.30
   2   2  -3   18.40    3.50
  -2   2   3   18.80    2.40
   2   2  -3   20.30    2.10
  -2   2   3   20.60    2.20
  -2  -2   3   21.60    2.20
   2  -2  -3   17.50    2.40
  -2   2  -3   23.50    2.70
   2   2   3   19.80    2.20
  -2   2  -3   16.60    3.90
   2   2   3   22.70    2.30
   2  -2  -3   27.30    3.00
  -2   2  -3   21.10    2.80
   2   2  -4  371.26   23.60
   2   2  -4  354.06   24.00
  -2  -2  -4  396.56   25.30
   2  -2   4  350.56   24.10
   2   2  -4  345.77   25.70
   2   2  -4  345.27   23.90
  -2   2   4  386.56   24.20
  -2  -2  -4  378.06   24.10
  -2   2   4  404.46   24.50
  -2  -2  -4  375.46   24.10
  -2   2   4  383.06   23.80
   2   2   4  392.06   24.00
  -2   2  -4  351.36   25.70
   2   2   4  383.66   23.90
   2  -2  -4  405.56   24.40
  -2   2  -4  347.07   24.20
  -2   2  -4  351.86   24.10
   2  -2  -4  381.06   24.30
  -2  -2   4  353.36   23.90
   2   2  -5  135.29   10.20
  -2  -2  -5  146.59   11.60
  -2   2   5  151.18   10.80
  -2  -2  -5  144.99   10.40
   2   2  -5  147.49    9.00
  -2   2   5  149.99   10.40
   2  -2   5  144.99   10.30
   2   2  -5  140.59   12.10
   2   2  -5  144.09   10.30
   2   2  -5  147.99    9.70
  -2  -2  -5  147.69   10.40
   2  -2  -5  140.89   11.70
  -2   2  -5  143.39   12.20
   2  -2  -5  136.09    9.70
  -2  -2   5  137.49   10.10
  -2   2  -5  133.99   10.50
   2   2   5  127.99    9.80
   2  -2  -5  143.09   10.50
   2  -2  -5  163.58   10.60
   2   2   5  139.19   10.20
  -2   2  -5  137.89   10.30
   2   2  -6   69.99    6.10
  -2   2   6   63.49    6.20
   2   2  -6   72.09    6.10
   2   2  -6   67.89    5.20
  -2  -2  -6   66.69    6.00
   2  -2   6   85.29    6.40
  -2  -2  -6   70.39    6.20
  -2   2   6   61.49    5.90
   2   2  -6   73.69    8.00
  -2  -2  -6   60.19    7.20
  -2  -2   6   70.99    6.00
  -2   2  -6   67.89    6.20
   2  -2  -6   73.19    6.20
  -2   2  -6   69.19    8.00
   2  -2  -6   74.79    6.30
   2  -2  -6   64.09    5.20
   2  -2  -6   70.49    7.60
   2   2   6   58.49    5.70
  -2   2  -6   75.89    6.30
   2   2   6   71.49    5.50
  -2  -2  -7   15.00    3.10
   2  -2   7    8.10    2.50
   2   2  -7   10.20    1.90
  -2   2   7   19.30    3.80
  -2  -2  -7   11.80    2.90
   2   2  -7   16.10    3.20
   2   2  -7    8.10    3.50
  -2  -2  -7   19.00    4.60
   2   2  -7   18.60    3.20
  -2   2   7   10.40    2.90
  -2   2  -7   14.60    3.00
   2   2   7   16.90    3.10
  -2   2  -7   11.80    3.00
  -2   2  -7   13.30    4.60
  -2  -2   7   14.00    2.90
   2  -2  -7   12.90    3.90
   2   2   7   15.20    2.40
   2  -2  -7   10.40    1.90
   2  -2  -7   13.00    3.00
   2  -2  -7   18.90    3.60
  -2  -2  -8   81.69    7.40
   2   2  -8   70.79    6.70
   2   2  -8   61.29    6.60
   2   2  -8   64.99    8.90
  -2   2   8   71.49    6.90
   2  -2   8   60.49    6.70
   2   2  -8   66.59    5.30
  -2   2   8   81.29    7.40
  -2  -2  -8   72.79    6.90
  -2  -2  -8   74.79    8.50
   2  -2  -8   67.99    5.40
  -2  -2   8   51.79    6.10
   2   2   8   79.39    6.90
   2  -2  -8   71.59    6.90
   2  -2  -8   82.49    7.40
  -2   2  -8   71.69    9.10
  -2   2  -8   63.99    6.90
   2  -2  -8   80.79    8.80
   2   2   8   68.29    5.80
  -2   2  -8   65.09    6.60
  -2  -2  -9   43.40    6.30
   2   2  -9   38.80    8.10
   2   2  -9   49.10    5.90
  -2  -2  -9   46.10    8.30
  -2  -2  -9   43.90    6.00
  -2   2   9   41.90    5.80
   2  -2   9   32.30    5.20
   2   2  -9   36.30    5.60
  -2   2  -9   41.50    5.90
  -2   2  -9   44.30    6.30
  -2   2  -9   32.90    7.40
   2  -2  -9   57.09    6.90
   2  -2  -9   49.20    6.30
   2   2   9   48.50    6.00
   2  -2  -9   42.80    8.20
  -2  -2   9   35.10    5.20
   2   2 -10   82.89   10.90
  -2  -2 -10   85.69   10.30
   2  -2  10   87.09    8.50
  -2   2  10   95.79    8.60
   2   2 -10   63.19    8.20
   2   2 -10   72.89    8.10
  -2  -2 -10   93.29    8.50
  -2  -2 -10   90.79    8.60
  -2   2 -10   60.69   10.90
  -2   2 -10   73.19    8.40
  -2   2 -10   75.09    8.00
   2  -2 -10   87.89   10.80
  -2  -2  10   76.49    8.00
   2   2  10   87.49    8.30
   2  -2 -10   89.99    8.50
   2  -2 -10   90.29    8.60
   2   2 -11    7.00    4.80
   2   2 -11    7.90    3.30
  -2  -2 -11    9.40    3.50
  -2  -2 -11    7.20    3.70
  -2  -2 -11   12.30    5.10
   2   2 -11    8.80    3.90
   2  -2  11    2.30    3.00
  -2   2  11    8.50    3.50
  -2  -2  11    7.50    3.20
  -2   2 -11    0.90    3.30
   2  -2 -11    9.70    3.70
   2  -2 -11    7.90    3.10
  -2   2 -11    6.20    2.90
  -2   2 -11    4.90    3.80
   2   2  11    6.80    3.30
   2  -2 -11   14.50    5.50
  -2  -2 -12    1.30    3.20
  -2  -2 -12    7.60    3.40
   2   2 -12    8.90    3.40
   2   2 -12    7.60    5.30
   2   2 -12    4.80    3.90
   2  -2  12    7.50    3.60
  -2  -2 -12    5.20    3.90
  -2   2  12    7.30    3.60
  -2  -2  12    3.20    3.10
  -2   2 -12    5.90    4.30
  -2   2 -12    1.40    3.60
   2  -2 -12    4.80    2.90
  -2   2 -12   10.30    3.70
   2   2  12   10.70    3.60
   2  -2 -12    2.80    3.50
   2   2 -13   15.80    4.60
  -2  -2 -13    4.10    3.20
  -2  -2 -13    8.60    4.40
   2  -2  13    8.00    4.00
  -2   2  13   -0.30    3.20
   2   2 -13    7.10    4.50
  -2  -2 -13    3.70    3.80
   2   2 -13    9.10    5.90
   2  -2 -13    2.70    4.10
   2  -2 -13    9.00    3.70
  -2  -2  13    8.50    3.80
  -2   2 -13   11.80    5.90
  -2   2 -13   11.30    4.90
  -2   2 -13    9.20    3.60
   2   2  13    4.80    3.30
   3  -2   0   13.70    2.20
  -3   2   0   11.70    2.20
  -3   2   0   19.80    3.60
   3   2   0    9.70    1.60
   3  -2   0   11.30    1.70
  -3  -2   0   10.10    2.70
  -3   2   0   11.70    2.10
   3  -2   0   13.60    2.20
  -3  -2  -1  799.92   48.10
  -3  -2  -1  793.82   46.60
  -3   2   1  820.22   47.40
  -3  -2  -1  765.42   46.70
   3   2  -1  776.12   47.00
   3  -2   1  700.63   47.20
   3   2  -1  702.93   46.50
  -3   2   1  814.42   47.20
  -3   2   1  788.42   48.20
   3  -2   1  683.73   47.10
   3  -2   1  708.23   47.00
  -3   2  -1  650.73   47.00
   3   2   1  799.12   46.60
   3   2   1  759.52   47.20
   3  -2  -1  809.92   47.30
  -3   2  -1  673.43   47.20
  -3  -2   1  723.43   46.50
   3  -2  -1  775.02   47.20
   3   2   1  771.12   46.90
  -3   2  -1  696.33   48.50
   3   2   1  798.62   46.80
  -3  -2   1  711.63   46.60
  -3   2   2  102.59    7.80
  -3  -2  -2   94.09    9.20
   3  -2   2  121.29    7.70
  -3  -2  -2  109.79    7.60
   3   2  -2  131.59    7.60
  -3  -2  -2  103.69    7.60
   3   2  -2  130.79    7.80
  -3   2   2  100.59    7.90
   3   2  -2  121.99    7.50
   3  -2   2  126.09    8.10
  -3   2   2   99.79    8.10
   3   2   2  103.49    7.50
  -3   2  -2  121.99    8.00
   3   2   2  105.29    7.90
  -3  -2   2  127.29    7.50
   3  -2  -2   96.89    7.90
  -3  -2   2  121.79    7.60
   3   2   2  108.89    7.50
   3  -2  -2   96.19    7.90
  -3   2  -2  121.89   10.30
  -3   2  -2  114.39    8.10
  -3   2   3  279.57   18.50
  -3  -2  -3  276.07   18.30
  -3  -2  -3  285.27   20.00
  -3   2   3  275.27   18.70
   3  -2   3  287.67   18.60
   3   2  -3  289.67   18.20
   3   2  -3  278.97   18.20
  -3  -2  -3  272.77   18.30
  -3   2   3  278.57   18.30
   3   2  -3  278.47   18.20
  -3   2  -3  276.27   20.40
  -3  -2   3  288.67   18.40
  -3   2  -3  294.47   18.70
   3   2   3  282.07   18.40
   3   2   3  276.47   18.20
  -3  -2   3  293.57   18.20
   3  -2  -3  269.47   18.50
  -3   2  -3  287.27   18.50
   3  -2  -3  289.97   18.60
   3   2  -4  120.99    7.50
   3   2  -4  109.99    7.40
  -3   2   4   88.59    7.10
  -3   2   4   88.29    7.60
  -3  -2  -4   90.89    7.40
  -3  -2  -4   91.29    8.80
   3   2  -4  103.39    7.20
  -3  -2  -4   89.89    7.30
   3  -2   4  127.49    7.90
  -3   2   4   93.99    7.60
   3  -2  -4   94.69    7.60
  -3   2  -4  113.99    7.80
  -3   2  -4  112.69    9.60
   3  -2  -4   93.99    7.60
   3   2   4   89.89    7.20
  -3  -2   4  123.29    7.50
   3  -2  -4   95.19    7.20
  -3   2  -4  116.39    7.90
   3   2   4   89.19    7.20
  -3   2   5  179.88   11.90
   3  -2   5  156.68   10.50
  -3  -2  -5  191.18   13.70
   3   2  -5  160.98   11.30
   3   2  -5  160.28   11.70
  -3  -2  -5  178.38   12.00
  -3  -2  -5  179.68   11.90
  -3   2   5  171.08   12.20
   3   2  -5  149.49   11.60
   3  -2   5  154.38   11.80
   3   2  -5  167.88   14.00
  -3   2   5  181.68   11.40
   3  -2  -5  171.98   12.00
  -3   2  -5  157.58   11.80
  -3   2  -5  155.08   13.70
   3  -2  -5  167.88   11.30
  -3  -2   5  155.48   11.50
   3   2   5  175.88   11.60
   3  -2  -5  169.28   12.00
   3   2   5  176.58   11.80
  -3   2  -5  157.48   12.00
  -3   2   6  139.29   11.30
   3   2  -6  157.38   10.30
   3   2  -6  145.19   10.80
  -3  -2  -6  140.59   11.00
  -3   2   6  135.49   10.80
  -3  -2  -6  139.69   10.80
  -3  -2  -6  140.79   12.50
   3   2  -6  149.69   11.00
   3  -2   6  147.39   11.00
   3   2  -6  158.88   13.50
   3  -2  -6  148.09   10.30
   3   2   6  145.49   10.80
   3  -2  -6  152.18   11.20
   3   2   6  157.38   10.50
   3  -2  -6  145.39   11.00
  -3   2  -6  148.89   11.30
  -3   2  -6  152.38   11.10
  -3  -2   6  154.28   10.80
  -3   2  -6  148.09   13.20
   3  -2   7   39.90    5.10
  -3  -2  -7   50.19    5.70
   3   2  -7   41.30    4.00
  -3   2   7   42.80    5.70
  -3   2   7   50.69    5.00
  -3  -2  -7   41.40    7.10
  -3  -2  -7   49.20    5.10
   3   2  -7   42.20    7.40
   3   2  -7   40.00    5.10
   3   2  -7   43.30    5.30
  -3   2  -7   42.90    5.30
  -3   2  -7   42.10    7.50
  -3  -2   7   50.19    4.80
   3  -2  -7   42.20    4.00
   3   2   7   39.90    4.10
   3   2   7   42.70    5.20
   3  -2  -7   41.80    5.30
  -3   2  -7   51.29    6.10
   3  -2  -7   42.90    5.50
   3   2  -8   52.29    9.00
   3   2  -8   61.59    5.10
   3   2  -8   59.49    6.40
   3   2  -8   70.19    6.40
  -3   2   8   59.49    6.70
  -3  -2  -8   68.89    6.80
  -3  -2  -8   60.69    7.90
  -3   2   8   66.19    6.30
  -3  -2  -8   66.29    6.30
   3  -2   8   60.69    6.30
   3  -2  -8   58.39    5.20
   3   2   8   74.09    6.60
  -3   2  -8   50.59    8.70
  -3   2  -8   59.99    6.30
  -3   2  -8   57.69    7.20
   3  -2  -8   58.99    6.20
   3  -2  -8   65.79    6.70
   3   2   8   58.79    5.40
  -3  -2   8   58.79    6.10
  -3  -2  -9   53.99    9.00
   3   2  -9   47.10    6.40
   3   2  -9   55.19   10.10
  -3  -2  -9   49.99    6.80
  -3   2   9   42.40    6.00
  -3  -2  -9   65.69    7.20
  -3   2   9   47.80    6.90
   3   2  -9   53.09    6.50
   3  -2   9   37.60    5.60
   3  -2  -9   63.89    7.60
   3  -2  -9   51.39    4.70
  -3   2  -9   44.60    6.70
   3   2   9   48.70    6.20
  -3   2  -9   46.40    9.00
   3  -2  -9   42.60    5.90
  -3  -2   9   52.39    6.40
  -3   2  -9   44.60    6.20
  -3   2  10   23.40    4.40
   3   2 -10   13.60    3.60
   3  -2  10   22.50    4.50
   3   2 -10   20.10    4.70
  -3  -2 -10   32.30    5.50
   3   2 -10   18.00    6.20
  -3  -2 -10   21.80    4.20
  -3  -2 -10   16.10    5.30
  -3   2 -10   20.10    4.90
   3  -2 -10   20.90    4.40
  -3   2 -10   26.20    5.10
  -3  -2  10   13.10    3.70
   3  -2 -10   27.50    5.20
   3   2  10   24.80    4.40
  -3   2 -10   23.50    6.40
   3   2 -11   17.40    4.30
   3   2 -11   18.10    7.10
   3   2 -11   10.90    4.20
  -3  -2 -11   32.00    7.70
  -3  -2 -11   25.30    5.10
   3  -2  11   22.50    4.60
  -3   2  11   16.80    4.00
  -3  -2 -11   20.60    5.10
   3   2  11   22.50    4.70
  -3   2 -11   14.60    6.00
   3  -2 -11   21.10    5.20
   3  -2 -11   17.60    4.30
  -3   2 -11   10.80    4.40
  -3  -2  11   21.30    4.40
  -3   2 -11   25.90    5.10
   3  -2  12   24.20    5.00
  -3  -2 -12   24.90    6.00
   3   2 -12   20.10    4.80
   3   2 -12   27.60    6.30
  -3  -2 -12   24.00    6.50
  -3   2  12   22.80    5.30
  -3  -2 -12   18.00    4.60
   3   2  12   12.70    4.30
  -3   2 -12   25.30    6.00
   3  -2 -12   20.90    5.70
   3  -2 -12   22.00    5.40
  -3  -2  12   24.60    4.90
  -3   2 -12   19.70    4.90
  -3   2 -12   15.10    5.90
  -3  -2 -13   10.40    4.90
  -3   2  13   12.10    4.80
   3  -2  13    7.70    4.00
  -3  -2 -13   12.00    5.30
   3   2 -13   13.80    5.10
   3   2 -13   14.50    4.30
  -3  -2 -13   11.10    4.20
   3  -2 -13   18.50    5.20
   3   2  13   10.70    4.10
   3  -2 -13   17.20    5.70
  -3   2 -13   10.10    4.90
  -3   2 -13    5.50    4.30
  -3  -2  13   11.50    4.30
  -3   2 -13   11.20    4.10
   4   2   0 1240.48   77.59
   4   2   0 1252.57   77.59
  -4   2   0 1231.68   79.69
   4   2   0 1281.47   78.19
  -4  -2   0 1278.97   77.69
  -4   2   0 1253.57   78.49
   4  -2   0 1279.07   78.29
  -4   2   0 1269.37   78.39
  -4  -2   0 1218.68   79.49
   4  -2   0 1221.68   78.29
   4  -2   0 1272.17   78.49
  -4  -2  -1  423.86   26.80
  -4  -2  -1  415.36   28.60
   4   2  -1  410.06   26.60
   4   2  -1  444.66   27.20
  -4   2   1  419.06   27.30
   4  -2   1  410.06   27.30
  -4   2   1  422.36   27.50
   4  -2   1  420.16   27.50
  -4  -2  -1  444.26   26.70
  -4   2   1  432.86   28.70
   4  -2   1  416.86   27.10
   4   2   1  431.96   26.80
   4  -2  -1  430.16   27.40
   4   2   1  432.66   26.70
  -4   2  -1  387.66   28.90
  -4  -2   1  427.76   26.60
   4  -2  -1  433.06   27.30
  -4   2  -1  417.26   27.50
  -4  -2   1  437.96   26.60
   4  -2  -1  429.56   27.20
   4   2   1  451.75   27.00
   4  -2   2  370.96   25.50
  -4  -2  -2  431.46   27.70
  -4  -2  -2  431.76   25.40
   4   2  -2  381.96   25.60
  -4  -2  -2  428.86   25.40
   4  -2   2  372.66   25.70
   4   2  -2  383.66   25.20
  -4   2   2  427.16   25.80
   4   2  -2  368.16   25.20
  -4   2   2  434.76   26.10
   4   2   2  414.46   25.40
  -4  -2   2  381.76   25.30
  -4   2  -2  335.57   27.50
   4  -2  -2  424.76   25.90
   4  -2  -2  440.96   25.90
  -4   2  -2  349.07   25.80
   4  -2  -2  419.36   25.70
   4   2   2  430.96   25.30
  -4  -2   2  377.06   25.20
  -4   2  -2  386.06   25.70
   4   2   2  422.46   25.90
  -4   2   3  336.17   21.20
  -4   2   3  341.87   21.60
   4   2  -3  348.27   21.10
   4   2  -3  319.07   20.80
   4  -2   3  276.47   21.10
  -4  -2  -3  345.27   21.00
   4   2  -3  320.77   20.80
  -4  -2  -3  324.97   23.10
   4  -2   3  326.47   20.60
  -4   2   3  304.47   21.00
  -4  -2  -3  334.77   20.90
  -4  -2   3  316.97   20.90
  -4   2  -3  307.67   21.30
  -4  -2   3  309.57   20.70
   4  -2  -3  342.37   21.40
  -4   2  -3  261.77   21.00
   4  -2  -3  345.97   21.10
   4   2   3  330.77   21.20
   4  -2  -3  353.26   21.10
   4   2   3  345.87   20.60
  -4   2  -3  282.97   23.10
   4  -2  -3  335.47   21.30
   4   2   3  335.57   20.90
  -4   2   4  559.44   37.00
   4  -2   4  586.84   36.70
   4   2  -4  569.54   36.40
  -4  -2  -4  550.94   36.50
  -4  -2  -4  561.74   38.50
   4   2  -4  575.74   36.50
  -4  -2  -4  557.44   36.60
  -4   2   4  541.65   36.60
   4  -2   4  585.74   35.80
  -4   2   4  565.64   36.40
   4   2  -4  605.84   36.40
   4  -2  -4  546.95   36.70
   4  -2  -4  577.84   36.90
  -4   2  -4  594.54   37.00
  -4  -2   4  590.34   36.60
  -4   2  -4  569.74   36.70
  -4  -2   4  582.44   36.30
   4   2   4  597.44   36.60
   4  -2  -4  568.74   36.40
   4  -2  -4  570.64   36.40
  -4   2  -4  591.74   39.20
   4   2   4  547.05   36.40
  -4  -2   4  565.74   35.60
   4   2  -5  181.58   12.60
  -4  -2  -5  175.18   12.70
   4  -2   5  182.28   11.50
  -4   2   5  172.78   12.20
  -4  -2  -5  175.98   12.60
   4   2  -5  180.88   12.60
   4   2  -5  186.08   12.30
  -4  -2  -5  184.58   14.70
  -4   2   5  168.38   12.70
  -4   2   5  180.28   13.10
   4  -2   5  196.78   12.90
  -4   2  -5  194.08   15.50
   4  -2  -5  166.98   12.80
   4   2   5  186.38   12.50
  -4  -2   5  192.88   12.50
   4  -2  -5  170.38   12.80
   4   2   5  161.08   12.40
  -4   2  -5  190.18   12.90
  -4   2  -5  185.78   13.10
   4  -2  -5  174.98   12.30
   4   2  -6   35.50    4.40
  -4  -2  -6   33.30    4.20
  -4   2   6   41.60    5.40
   4   2  -6   40.70    4.80
   4   2  -6   41.10    4.20
  -4  -2  -6   39.10    4.90
  -4   2   6   36.60    4.70
  -4   2   6   35.70    3.60
   4  -2   6   42.40    4.90
  -4  -2  -6   36.60    6.70
  -4   2  -6   39.50    7.50
  -4  -2   6   40.70    4.60
   4   2   6   37.90    3.90
   4   2   6   33.10    4.20
  -4   2  -6   39.80    4.90
   4  -2  -6   36.60    3.70
   4  -2  -6   41.00    5.00
   4  -2  -6   40.50    4.80
   4  -2  -6   37.40    3.60
  -4   2  -6   39.80    5.10
  -4   2   7   99.89    8.60
  -4   2   7  103.89    8.50
   4   2  -7   92.79    7.40
   4  -2   7   96.79    8.30
   4   2  -7   90.29    8.00
  -4  -2  -7  102.39   10.30
  -4  -2  -7  100.09    8.20
   4   2  -7   88.79    8.10
  -4  -2  -7  105.39    8.50
  -4   2  -7   92.69   10.70
  -4  -2   7   86.39    7.80
   4  -2  -7  101.49    8.50
   4   2   7  114.19    8.40
   4   2   7  102.09    7.60
   4  -2  -7   94.39    7.50
   4  -2  -7  106.89    7.50
  -4   2  -7   83.49    8.20
   4  -2  -7  109.19    8.60
  -4   2  -7   90.29    8.40
  -4  -2  -8   71.69    7.30
  -4  -2  -8   67.39    6.90
   4  -2   8   89.29    7.50
  -4   2   8   68.69    7.20
  -4   2   8   68.59    7.40
   4   2  -8   79.99    7.20
   4   2  -8   67.49    6.00
   4   2  -8   93.29    7.70
  -4  -2  -8   62.09    8.50
   4  -2  -8   64.89    6.10
   4  -2  -8   67.09    7.10
   4  -2  -8   73.59    7.40
   4   2   8   72.79    6.30
  -4   2  -8   91.59   10.10
  -4   2  -8  102.69    8.30
   4   2   8   67.69    6.90
   4  -2  -8   66.39    5.90
  -4   2  -8   78.69    7.20
  -4  -2   8   89.79    7.10
   4  -2   9   49.30    6.30
  -4  -2  -9   49.00    8.50
  -4   2   9   39.40    6.10
  -4  -2  -9   36.00    5.60
   4   2  -9   51.09    6.50
   4   2  -9   41.70    5.70
   4   2  -9   45.70    4.70
  -4   2   9   33.30    5.40
  -4  -2  -9   27.60    5.00
  -4   2  -9   41.10    8.40
  -4  -2   9   38.00    5.40
  -4   2  -9   54.19    6.80
   4  -2  -9   44.20    6.10
   4  -2  -9   33.00    5.20
   4   2   9   35.10    5.40
  -4   2  -9   41.80    6.00
   4  -2  -9   39.10    4.50
  -4  -2 -10   22.40    4.70
  -4  -2 -10   20.80    4.80
   4  -2  10   27.70    5.30
  -4  -2 -10   26.50    6.90
   4   2 -10   31.30    5.10
   4   2 -10   32.70    5.60
  -4   2  10   21.00    4.70
  -4   2 -10   29.40    7.70
  -4  -2  10   27.10    4.80
   4  -2 -10   19.80    4.50
  -4   2 -10   31.60    5.90
   4   2  10   20.10    4.20
   4  -2 -10   26.90    4.90
  -4   2 -10   20.30    4.60
   4   2 -11    4.20    3.40
   4  -2  11    4.70    3.00
   4   2 -11    5.60    3.00
  -4  -2 -11    9.40    3.50
  -4  -2 -11    1.70    3.20
  -4  -2 -11    7.10    4.00
  -4   2  11    7.60    3.50
  -4   2 -11    3.80    3.00
   4  -2 -11    7.50    3.80
  -4  -2  11    3.00    2.80
  -4   2 -11    4.70    3.90
   4   2  11    5.40    3.20
   4  -2 -11    6.50    3.00
  -4   2 -11    5.30    4.00
  -4  -2 -12    5.90    3.70
   4  -2  12   15.50    4.60
  -4  -2 -12   21.30    5.00
   4   2 -12   11.90    4.50
  -4   2  12   21.00    5.00
   4   2 -12   13.50    4.50
  -4  -2 -12   15.40    5.40
  -4   2 -12   18.20    5.60
   4  -2 -12   10.90    4.20
  -4  -2  12   21.70    4.70
   4   2  12   12.50    4.30
  -4   2 -12   19.20    6.90
   4  -2 -12   14.70    4.50
  -4   2 -12   11.40    3.90
  -4  -2 -13    5.00    3.80
   4   2 -13    7.50    3.60
   4  -2  13   -3.00    2.90
  -4  -2 -13    3.50    2.90
  -4   2  13    8.20    3.80
  -4  -2 -13   13.30    5.00
   4   2  13   11.30    4.20
  -4   2 -13   10.60    5.10
   4  -2 -13    3.10    3.50
   4  -2 -13    7.70    4.30
  -4   2 -13    5.70    3.30
  -4   2 -13    5.90    4.70
   5  -2   0   93.29    6.90
  -5   2   0   99.29    7.50
   5  -2   0   97.49    7.30
   5   2   0   98.49    6.30
  -5  -2   0   91.79    8.50
   5  -2   0   94.29    7.20
   5  -2   0   88.89    6.90
  -5   2   0   92.49    7.20
  -5  -2   0  101.79    6.40
   5   2   0   84.09    6.80
  -5   2   0   93.39    9.10
   5  -2   1  104.09    7.20
   5  -2   1  108.39    7.50
  -5  -2  -1  102.99    6.80
   5   2  -1  102.29    6.80
   5   2  -1  102.99    7.40
   5  -2   1   99.49    7.60
  -5   2   1   99.69    7.60
  -5  -2  -1   90.69    9.20
  -5  -2  -1   99.69    7.00
  -5   2   1  103.69    7.90
  -5   2   1   93.59    9.20
   5  -2   1  103.99    7.90
   5  -2  -1  103.09    7.50
  -5  -2   1  103.99    6.80
  -5  -2   1  107.49    6.80
  -5   2  -1  102.09    7.90
   5  -2  -1   98.69    7.60
   5   2   1  103.39    6.80
   5   2   1   98.49    7.20
  -5   2  -1  107.99    9.80
   5  -2  -1  102.99    7.40
   5  -2  -1   99.69    7.60
   5   2  -2  175.58   12.30
   5  -2   2  188.88   13.30
   5   2  -2  188.48   12.40
  -5  -2  -2  189.38   12.40
  -5   2   2  196.58   13.30
  -5  -2  -2  189.08   12.60
   5  -2   2  192.28   12.80
   5   2  -2  198.78   12.90
   5  -2   2  190.88   13.00
  -5   2   2  191.18   13.00
  -5  -2  -2  198.08   15.20
   5  -2   2  184.28   12.50
   5  -2  -2  184.88   13.00
  -5   2  -2  194.68   13.30
   5  -2  -2  183.98   12.80
   5   2   2  189.98   12.40
   5   2   2  192.78   12.60
  -5  -2   2  200.58   12.40
   5  -2  -2  191.88   12.90
  -5   2  -2  170.28   15.40
  -5  -2   2  188.78   12.40
  -5   2  -2  188.08   12.90
   5  -2  -2  197.48   13.10
  -5  -2  -3   49.80    4.00
   5   2  -3   47.70    4.30
  -5   2   3   49.60    4.40
   5  -2   3   46.80    4.60
   5   2  -3   42.50    3.90
  -5  -2  -3   50.79    4.20
  -5   2   3   52.99    4.70
   5   2  -3   47.50    3.90
  -5  -2  -3   57.29    8.00
  -5   2   3   47.10    4.60
   5  -2   3   46.90    3.70
  -5  -2   3   45.10    3.90
  -5  -2   3   47.60    4.00
  -5   2  -3   47.30    4.80
   5  -2  -3   44.80    4.10
   5  -2  -3   51.19    4.30
   5   2   3   51.49    3.90
   5  -2  -3   49.10    4.60
  -5   2  -3   40.80    4.30
   5  -2  -3   47.00    4.40
   5   2   3   47.50    4.00
  -5   2  -3   53.59    8.50
  -5   2   4   18.40    2.70
  -5   2   4    7.90    2.30
  -5  -2  -4   15.20    2.50
  -5   2   4   11.60    2.50
  -5  -2  -4   11.30    2.00
   5  -2   4   15.50    1.80
   5   2  -4   16.80    2.30
   5  -2   4   11.30    2.40
   5   2  -4   15.60    2.30
  -5  -2  -4   19.60    5.60
   5   2  -4   14.80    2.30
   5  -2  -4   13.70    2.40
  -5   2  -4   17.10    2.70
   5  -2  -4   12.70    2.40
   5   2   4   13.80    2.20
   5   2   4   14.00    2.40
  -5  -2   4   19.80    2.40
   5   2   4   16.20    2.00
  -5   2  -4   13.90    5.00
   5  -2  -4   11.50    2.40
  -5   2  -4   15.70    3.00
   5  -2  -4   10.40    2.20
  -5  -2   4   14.60    2.40
  -5  -2  -5  384.36   24.10
  -5  -2  -5  392.26   26.90
  -5  -2  -5  366.16   24.20
   5   2  -5  339.67   23.90
  -5   2   5  393.06   24.30
   5   2  -5  363.26   23.90
   5  -2   5  355.76   23.00
   5   2  -5  343.97   23.90
  -5   2   5  375.26   24.60
   5  -2   5  355.66   24.20
  -5   2   5  395.06   23.90
   5  -2  -5  375.06   23.90
  -5   2  -5  342.07   26.80
  -5  -2   5  356.26   24.10
  -5  -2   5  333.47   22.90
   5   2   5  382.06   24.00
   5   2   5  369.16   24.00
  -5   2  -5  363.86   24.30
  -5  -2   5  335.87   23.70
   5  -2  -5  373.36   23.80
   5  -2  -5  392.36   24.50
   5  -2  -5  378.86   24.40
  -5   2  -5  342.67   24.40
  -5  -2  -6   25.00    4.10
   5  -2   6   35.00    4.40
  -5  -2  -6   35.30    4.40
  -5   2   6   30.60    3.40
   5   2  -6   32.90    4.10
   5   2  -6   38.10    4.10
  -5   2   6   37.50    4.70
  -5   2   6   34.90    4.90
   5  -2   6   31.00    2.50
  -5  -2  -6   30.70    6.40
   5   2  -6   34.40    4.00
   5  -2  -6   36.80    4.30
   5  -2  -6   35.40    4.80
  -5   2  -6   31.30    4.60
   5   2   6   32.40    4.00
   5   2   6   30.90    4.20
  -5   2  -6   36.50    7.60
   5  -2  -6   28.10    3.70
  -5  -2   6   42.90    4.10
  -5   2  -6   31.90    4.30
   5  -2  -6   32.30    4.50
  -5  -2  -7   17.60    5.30
  -5   2   7   21.10    3.00
   5   2  -7   19.60    3.10
  -5   2   7   22.20    4.20
   5  -2   7   18.10    3.80
  -5  -2  -7   19.80    3.60
   5   2  -7   23.20    3.90
   5   2  -7   14.90    3.10
  -5  -2  -7   17.90    3.80
  -5   2   7   14.90    3.40
  -5   2  -7   22.20    3.90
   5   2   7   25.00    3.80
   5   2   7   20.00    3.10
  -5   2  -7   18.30    5.80
  -5   2  -7   25.00    4.40
   5  -2  -7   20.30    3.80
  -5  -2   7   23.20    3.50
   5  -2  -7   23.30    4.00
   5  -2  -7   22.50    3.30
   5  -2  -7   21.10    3.20
   5  -2   8   35.40    5.40
  -5  -2  -8   63.99    5.90
  -5   2   8   49.70    6.30
   5   2  -8   42.00    4.80
  -5   2   8   50.59    6.30
   5   2  -8   29.00    4.80
  -5  -2  -8   57.99    8.90
   5   2  -8   39.30    5.60
  -5  -2  -8   47.10    6.20
   5  -2  -8   44.20    5.70
   5  -2  -8   49.40    5.20
  -5  -2   8   48.00    5.60
  -5   2  -8   32.10    5.20
   5  -2  -8   53.29    6.50
  -5   2  -8   30.60    5.50
   5   2   8   56.09    5.60
   5   2   8   43.10    4.50
  -5   2  -8   36.70    7.90
   5  -2  -8   49.30    4.50
  -5  -2  -9   56.19    7.50
  -5  -2  -9   75.79   11.20
   5   2  -9   59.09    7.40
   5   2  -9   56.49    5.70
  -5  -2  -9   59.09    7.10
  -5   2   9   73.19    8.10
   5  -2   9   40.20    6.40
  -5   2   9   61.19    7.70
   5   2  -9   58.49    7.30
   5  -2  -9   73.59    7.10
  -5   2  -9   57.39    7.40
  -5   2  -9   57.29    7.50
   5  -2  -9   62.19    7.70
   5   2   9   63.79    6.70
  -5   2  -9   59.99   10.70
   5  -2  -9   62.79    5.70
  -5  -2   9   71.59    6.70
   5   2 -10    1.30    2.30
  -5  -2 -10    0.60    2.00
   5   2 -10    5.50    3.10
  -5   2  10    2.30    3.00
  -5   2  10   -0.60    2.60
  -5  -2 -10    3.20    3.20
  -5  -2 -10    1.50    2.60
   5  -2  10    3.10    2.90
  -5   2 -10    1.90    2.50
  -5   2 -10    3.00    3.30
  -5  -2  10   -1.70    2.30
   5   2  10    2.80    2.50
  -5   2 -10    6.80    4.30
   5  -2 -10    3.00    2.80
   5  -2 -10    3.90    2.80
   5  -2  11   12.50    4.10
  -5  -2 -11   13.90    5.50
   5   2 -11    9.10    3.70
  -5  -2 -11    3.10    3.00
  -5   2  11    7.30    3.60
  -5  -2 -11    4.60    2.80
   5   2 -11    9.80    3.80
  -5   2 -11   13.60    5.40
  -5   2 -11    4.50    3.80
   5  -2 -11    7.80    3.60
   5  -2 -11    7.80    3.60
  -5   2 -11   13.70    4.10
   5   2  11    7.00    3.30
  -5   2  12   12.40    4.20
   5   2 -12    6.80    3.60
  -5  -2 -12    7.30    3.30
  -5  -2 -12    1.20    3.30
  -5  -2 -12   19.00    5.50
   5  -2  12    7.90    3.70
   5   2  12    7.60    3.40
  -5   2 -12    3.60    4.10
  -5   2 -12    5.60    3.40
   5  -2 -12    7.30    3.80
   5  -2 -12    7.30    4.20
   5  -2  13    3.70    3.90
  -5  -2 -13    9.00    3.60
   5   2 -13   15.80    4.60
  -5  -2 -13    0.70    4.00
  -5   2  13    5.40    3.90
  -5  -2 -13   11.30    4.00
  -5   2 -13   -1.30    4.10
   5   2  13    6.50    3.70
   5  -2 -13   10.10    4.50
  -5   2 -13    5.30    3.50
  -5   2 -13    6.20    3.80
   5  -2 -13    6.70    4.10
   6  -2   0   21.60    3.30
  -6  -2   0   21.70    2.00
   6  -2   0   15.50    2.80
  -6   2   0   20.70    3.50
  -6   2   0   15.10    4.40
  -6  -2   0   18.20    4.50
  -6   2   0   23.00    3.20
  -6  -2   0   18.90    2.30
   6  -2   0   19.00    2.60
   6   2   0   24.80    2.90
   6  -2   0   17.70    2.80
   6   2   0   19.60    2.00
  -6   2   1   16.30    2.90
   6  -2   1   18.90    2.50
  -6  -2  -1   14.00    2.30
   6   2  -1   25.90    3.10
  -6  -2  -1   12.00    4.20
   6   2  -1   25.90    2.40
   6  -2   1   27.30    3.30
   6  -2   1   23.40    3.40
  -6  -2  -1   18.90    2.00
   6  -2   1   25.70    3.30
  -6   2   1   20.70    3.30
  -6   2   1   16.70    4.70
   6  -2  -1   15.10    2.80
   6   2   1   16.60    2.40
  -6  -2   1   24.90    2.10
  -6   2  -1   25.40    3.50
   6  -2  -1   17.20    2.80
   6  -2  -1   15.90    2.50
   6  -2  -1   17.10    2.70
  -6   2  -1   24.90    5.60
  -6  -2   1   24.90    2.40
   6   2   1   18.50    2.60
   6   2   1   19.10    2.00
  -6  -2  -2   71.09    8.30
   6  -2   2   69.49    6.20
  -6  -2  -2   78.89    5.70
   6  -2   2   73.69    6.40
  -6  -2  -2   84.89    5.50
   6   2  -2   66.29    5.40
   6  -2   2   68.49    5.60
  -6   2   2   81.09    8.50
  -6   2   2   90.19    6.50
   6   2  -2   68.39    5.90
   6   2  -2   68.29    5.30
  -6   2   2   71.49    6.30
  -6   2  -2   70.89    6.40
  -6  -2   2   67.09    5.40
   6   2   2   72.39    5.70
   6  -2  -2   84.39    6.20
  -6   2  -2   71.89    9.40
   6   2   2   80.89    5.50
   6  -2  -2   75.99    6.00
  -6   2  -2   68.39    6.00
  -6  -2   2   73.39    5.40
   6  -2  -2   81.49    6.20
   6  -2  -2   78.69    6.10
   6   2  -3  275.67   17.70
  -6  -2  -3  268.97   17.80
   6  -2   3  279.57   18.40
  -6  -2  -3  268.07   18.00
   6  -2   3  281.97   18.70
   6   2  -3  273.47   17.70
  -6   2   3  261.07   18.60
   6  -2   3  279.87   17.80
   6   2  -3  279.37   18.20
  -6  -2  -3  269.87   21.20
  -6   2   3  268.17   18.30
   6  -2  -3  251.97   18.20
  -6   2  -3  281.87   18.60
   6  -2  -3  268.17   18.30
  -6   2  -3  281.27   21.90
  -6  -2   3  285.97   17.70
  -6   2  -3  269.17   18.30
  -6  -2   3  287.77   17.90
   6  -2  -3  261.07   18.20
   6   2   3  264.77   17.80
   6   2   3  264.27   17.70
   6  -2  -3  259.67   18.20
   6  -2   4   97.69    8.40
   6   2  -4  115.79    8.40
   6  -2   4  106.19    7.50
  -6  -2  -4  107.49   11.80
  -6   2   4  108.39    8.70
   6   2  -4  114.29    8.00
  -6   2   4   99.29    8.40
   6   2  -4  111.99    7.90
  -6  -2  -4  114.29    8.10
  -6  -2  -4  101.39    8.10
  -6   2   4  109.09    8.20
  -6  -2   4  107.09    8.00
  -6  -2   4  115.89    8.00
  -6   2  -4  111.99    8.80
   6   2   4  105.19    8.00
   6  -2  -4  111.69    8.50
   6  -2  -4  102.89    8.20
  -6   2  -4  107.39    8.40
   6  -2  -4  101.69    8.10
   6  -2  -4  104.59    8.50
   6   2   4  106.49    7.60
  -6   2  -4  109.79   11.90
  -6  -2  -5   86.19    7.30
  -6   2   5   84.99    6.90
   6   2  -5   89.19    7.20
   6   2  -5   85.19    7.00
  -6   2   5   77.39    7.50
  -6  -2  -5   84.89   10.60
   6  -2   5   84.49    6.20
   6  -2   5   87.89    7.40
   6   2  -5   92.29    7.00
  -6   2   5   82.09    7.40
  -6  -2  -5   83.19    6.90
   6   2   5   86.49    7.00
   6  -2  -5   86.69    7.40
  -6   2  -5   92.39    7.40
  -6  -2   5   94.59    7.20
  -6  -2   5   88.39    6.20
   6  -2  -5   92.29    7.10
   6   2   5   85.49    6.30
  -6   2  -5   95.29    7.90
   6  -2  -5   84.29    7.00
  -6   2  -5   89.89   10.80
   6  -2  -5   80.09    7.30
  -6  -2   5   94.59    7.00
  -6   2   6   27.50    3.60
  -6  -2  -6   27.70    7.00
   6   2  -6   23.40    3.50
   6  -2   6   23.00    2.30
   6   2  -6   30.00    3.90
  -6   2   6   25.30    4.20
   6   2  -6   30.80    3.90
  -6  -2  -6   32.90    4.50
  -6   2   6   23.60    3.70
   6  -2   6   22.10    3.80
  -6  -2  -6   24.40    3.60
  -6   2  -6   21.60    4.30
  -6   2  -6   22.90    3.60
   6  -2  -6   33.00    3.90
  -6  -2   6   20.60    3.60
   6   2   6   21.70    3.40
  -6  -2   6   21.10    3.50
   6  -2  -6   23.80    3.80
   6  -2  -6   25.90    3.90
   6  -2  -6   25.80    3.70
  -6   2  -6   19.20    6.30
  -6  -2  -7   21.30    4.20
  -6  -2  -7   30.10    7.00
   6   2  -7   28.10    4.10
   6  -2   7   26.40    4.60
   6   2  -7   22.60    3.50
  -6   2   7   30.80    4.60
  -6  -2  -7   19.90    3.60
   6   2  -7   20.90    3.80
  -6   2   7   26.70    3.50
  -6   2   7   33.20    5.20
  -6   2  -7   26.90    4.80
  -6   2  -7   21.60    6.70
  -6   2  -7   25.60    4.40
   6   2   7   27.10    4.10
  -6  -2   7   21.90    3.80
   6  -2  -7   29.90    3.90
   6  -2  -7   28.80    3.80
   6  -2  -7   27.80    4.40
   6  -2  -7   36.30    5.00
   6  -2   8   82.29    7.60
  -6  -2  -8   68.39    6.90
  -6  -2  -8   68.39    7.30
   6   2  -8   72.79    7.10
  -6  -2  -8   68.19    9.30
  -6   2   8   68.59    7.20
   6   2  -8   65.49    6.40
   6   2  -8   78.39    7.10
  -6   2   8   65.79    7.40
   6   2   8   73.69    7.10
   6  -2  -8   66.19    7.10
  -6  -2   8   83.59    7.20
  -6   2  -8   95.29   10.70
   6  -2  -8   67.39    7.20
  -6   2  -8   72.29    7.30
   6  -2  -8   67.19    6.20
   6  -2  -8   73.69    6.50
  -6   2  -8   68.59    7.70
   6   2  -9   15.30    3.80
  -6  -2  -9   18.20    5.50
   6  -2   9   13.40    3.70
   6   2  -9   18.00    3.90
  -6  -2  -9   18.20    3.90
  -6  -2  -9   19.30    4.60
  -6   2   9   20.00    4.00
  -6   2   9    8.80    3.40
   6   2  -9   10.00    2.80
  -6   2  -9   19.50    3.80
   6   2   9   23.60    4.20
  -6   2  -9   20.30    6.20
   6  -2  -9   11.50    2.90
   6  -2  -9   13.90    3.80
   6  -2  -9   15.00    4.00
  -6   2  -9   12.70    4.20
  -6  -2   9   12.40    4.90
  -6  -2 -10    6.10    3.00
  -6   2  10    7.00    3.40
   6  -2  10    9.90    3.70
  -6  -2 -10    7.00    4.00
   6   2 -10    3.50    2.70
  -6   2  10    5.30    3.20
  -6  -2 -10    2.40    3.00
  -6   2 -10    8.40    4.80
  -6   2 -10    5.70    3.00
  -6   2 -10    3.90    3.60
   6   2  10    2.70    2.80
   6  -2 -10    3.60    2.70
   6  -2 -10    4.60    3.20
  -6  -2 -11   17.60    5.60
   6  -2  11   17.30    4.80
  -6  -2 -11   16.90    4.80
   6   2 -11   23.80    4.90
  -6  -2 -11   12.30    3.90
  -6   2  11    9.70    4.00
  -6   2 -11   17.60    5.40
  -6   2 -11   12.70    5.20
   6  -2 -11   11.70    3.80
  -6   2 -11   13.70    4.00
   6  -2 -11   12.00    4.10
   6   2  11   13.30    4.00
  -6  -2 -12    4.70    3.20
  -6  -2 -12    2.70    3.90
  -6  -2 -12   13.10    4.70
  -6   2  12    8.70    4.20
   6   2 -12    6.80    3.60
   6  -2  12    7.30    3.90
  -6   2 -12   12.00    5.40
  -6   2 -12    6.40    4.20
   6  -2 -12   13.40    4.50
  -6   2 -12    9.10    3.90
   6  -2 -12    0.60    3.50
   6   2  12    4.30    3.40
  -6  -2 -13    0.60    4.20
   6   2 -13    9.20    4.30
   6  -2  13    5.80    4.20
  -6  -2 -13   15.50    4.80
   6   2  13    4.80    4.00
  -6   2 -13    1.30    3.20
  -6   2 -13    3.90    4.20
   6  -2 -13    4.30    3.70
  -6   2 -13   11.00    4.30
  -7   2   0   42.00    5.00
  -7   2   0   37.80    4.30
   7  -2   0   33.30    4.30
   7  -2   0   37.20    4.30
   7  -2   0   35.90    3.70
   7   2   0   34.50    4.00
   7  -2   0   39.30    3.90
  -7  -2   0   35.70    3.30
  -7   2   0   30.00    6.40
  -7  -2   0   38.30    3.10
  -7  -2   0   37.30    6.60
   7   2   0   33.70    3.10
   7  -2   1  173.48   12.80
  -7  -2  -1  164.18   12.00
   7  -2   1  181.58   12.60
   7   2  -1  185.58   12.50
  -7  -2  -1  166.18   11.70
   7   2  -1  178.58   11.80
  -7  -2  -1  165.28   14.90
   7  -2   1  181.28   12.60
  -7   2   1  182.78   13.00
  -7   2   1  177.58   12.60
  -7   2   1  159.38   14.70
   7  -2   1  184.98   12.30
   7  -2  -1  184.68   12.70
   7  -2  -1  168.28   12.50
  -7  -2   1  183.98   11.80
   7   2   1  157.58   11.90
  -7   2  -1  188.68   15.80
  -7   2  -1  187.68   12.50
   7   2   1  174.68   12.20
   7  -2  -1  182.78   12.70
  -7  -2   1  201.48   15.40
  -7  -2   1  186.48   11.80
  -7   2  -1  179.88   13.00
   7   2   1  179.18   11.70
   7  -2  -1  192.38   12.60
  -7  -2  -2  218.28   14.00
  -7   2   2  216.98   17.00
   7   2  -2  196.98   13.70
   7   2  -2  196.88   13.60
  -7   2   2  217.98   14.50
   7  -2   2  212.58   14.10
  -7  -2  -2  222.38   13.70
   7   2  -2  185.28   14.20
  -7  -2  -2  219.88   17.60
   7  -2   2  196.38   14.60
  -7   2   2  226.18   14.80
   7  -2   2  189.08   14.30
  -7  -2   2  186.58   13.60
   7   2   2  226.48   14.10
  -7   2  -2  194.78   14.60
   7  -2  -2  207.78   14.40
   7  -2  -2  218.58   14.50
  -7   2  -2  192.48   17.80
  -7  -2   2  198.48   13.70
   7   2   2  208.38   14.10
   7  -2  -2  217.28   14.50
   7   2   2  218.48   13.70
  -7   2  -2  193.08   14.20
   7  -2  -2  223.88   14.50
   7  -2   3  431.96   28.20
   7   2  -3  435.06   28.10
   7  -2   3  431.76   29.10
  -7  -2  -3  441.86   32.20
   7   2  -3  429.96   28.70
  -7   2   3  439.16   28.80
  -7   2   3  450.65   29.20
   7  -2   3  419.36   28.70
  -7  -2  -3  454.15   28.40
  -7  -2  -3  456.05   28.20
   7   2  -3  440.16   28.20
   7   2   3  447.26   28.20
  -7  -2   3  427.46   28.10
   7  -2  -3  465.95   28.90
  -7   2  -3  439.56   29.10
   7  -2  -3  460.15   28.80
   7   2   3  452.05   28.30
   7  -2  -3  436.46   28.80
  -7   2  -3  428.36   28.70
   7  -2  -3  451.15   28.80
  -7   2  -3  413.16   32.30
  -7  -2   3  408.76   28.20
   7   2  -4   54.99    4.70
  -7  -2  -4   48.30    9.00
  -7   2   4   45.40    5.30
   7   2  -4   49.90    5.00
  -7   2   4   46.80    5.50
  -7  -2  -4   57.09    5.30
  -7  -2  -4   58.29    4.80
   7  -2   4   59.49    4.50
   7  -2   4   53.89    5.40
  -7   2   4   49.10    5.10
   7   2  -4   61.79    4.90
   7  -2  -4   48.60    5.50
   7  -2  -4   48.50    5.00
   7   2   4   59.29    4.70
  -7  -2   4   53.99    4.80
  -7  -2   4   55.69    4.90
  -7   2  -4   53.19    6.20
  -7   2  -4   52.49    5.20
   7  -2  -4   47.70    5.10
  -7   2  -4   53.09    9.90
   7   2   4   49.10    4.70
   7  -2  -4   57.59    5.20
   7   2  -5   55.19    5.00
  -7  -2  -5   53.29    5.70
   7   2  -5   47.20    5.00
  -7   2   5   62.89    6.00
   7   2  -5   49.40    5.20
   7  -2   5   56.09    5.80
  -7   2   5   52.19    5.30
  -7  -2  -5   50.69    4.90
  -7  -2  -5   56.09    9.90
  -7   2   5   62.19    6.00
   7  -2   5   54.59    4.40
  -7  -2   5   45.60    5.00
  -7   2  -5   50.09   10.30
   7  -2  -5   60.79    5.40
  -7   2  -5   56.29    6.20
  -7   2  -5   58.79    5.60
   7  -2  -5   54.19    5.50
   7  -2  -5   60.59    5.90
  -7  -2   5   50.09    5.00
   7  -2  -5   51.19    5.80
   7   2   5   60.29    4.70
   7   2   5   63.09    5.30
   7   2  -6  205.68   15.10
   7   2  -6  207.48   15.10
   7   2  -6  191.98   15.00
  -7   2   6  239.78   15.80
   7  -2   6  211.28   15.60
  -7   2   6  230.88   15.10
  -7   2   6  218.98   15.90
  -7  -2  -6  213.68   15.20
  -7  -2  -6  231.78   15.60
  -7  -2  -6  220.48   19.20
  -7  -2   6  214.68   15.10
   7  -2  -6  213.08   15.60
  -7   2  -6  215.18   19.50
   7  -2  -6  220.38   15.10
  -7  -2   6  199.18   15.20
   7  -2  -6  215.28   15.20
   7   2   6  217.08   15.20
   7  -2  -6  210.08   15.50
  -7   2  -6  215.58   15.60
  -7   2  -6  193.48   15.60
  -7  -2  -7   42.10    5.80
  -7   2   7   31.90    5.50
   7   2  -7   54.39    6.80
  -7   2   7   41.30    5.80
  -7   2   7   40.70    4.50
  -7  -2  -7   36.70    8.30
   7   2  -7   54.79    6.00
  -7  -2  -7   41.50    5.40
   7  -2   7   43.50    6.00
   7   2  -7   43.10    5.20
  -7   2  -7   42.40    6.20
   7  -2  -7   44.70    5.20
   7  -2  -7   42.40    5.70
   7  -2  -7   50.59    6.20
   7  -2  -7   41.70    5.40
  -7   2  -7   46.30    5.90
  -7   2  -7   41.60    8.70
   7   2   7   40.50    5.40
  -7  -2   7   57.19    5.60
  -7   2   8   69.39    6.80
  -7  -2  -8   61.69    6.40
  -7  -2  -8   52.99    6.90
   7  -2   8   50.99    6.70
  -7  -2  -8   61.49   10.00
   7   2  -8   60.89    7.10
   7   2  -8   53.19    6.30
  -7   2   8   49.70    7.10
   7  -2  -8   57.69    5.70
   7  -2  -8   59.79    7.20
   7  -2  -8   67.09    6.80
   7   2   8   60.79    6.40
   7  -2  -8   64.99    6.80
  -7   2  -8   52.99    6.70
  -7   2  -8   58.79    7.70
  -7   2  -8   61.29   10.70
  -7  -2  -9    7.90    3.00
   7  -2   9   13.50    3.80
   7   2  -9   10.30    3.40
  -7  -2  -9    6.50    3.60
  -7   2   9   12.30    3.90
  -7   2   9   12.40    3.60
  -7  -2  -9   18.70    5.90
   7   2  -9    7.50    2.80
  -7   2  -9   14.00    3.50
   7  -2  -9   10.50    3.40
   7   2   9   13.50    3.60
   7  -2  -9   12.30    3.10
  -7   2  -9    8.50    3.80
   7  -2  -9    9.90    3.40
  -7   2  -9   14.70    6.00
   7   2 -10    7.40    3.20
  -7  -2 -10   -4.00    2.30
   7  -2  10    9.90    3.60
  -7  -2 -10    3.70    4.60
  -7  -2 -10    3.80    3.90
  -7   2  10   -5.00    2.10
  -7   2  10   12.10    3.90
  -7   2 -10    3.80    3.00
  -7   2 -10    3.30    4.00
   7   2  10    3.00    2.70
   7  -2 -10    2.90    2.80
   7  -2 -10    3.40    2.80
   7  -2 -10    3.50    2.90
  -7   2 -10    4.00    3.80
   7   2 -11   12.30    4.00
   7  -2  11   20.40    5.10
  -7   2  11   15.30    4.90
  -7  -2 -11    5.30    3.80
  -7   2 -11   13.60    5.10
   7   2  11    6.40    3.50
  -7   2 -11   13.70    5.50
   7  -2 -11    8.70    3.90
   7  -2 -11    7.20    3.60
  -7   2 -11   12.60    4.30
   7   2 -12    5.60    3.70
   7  -2  12   -0.40    3.20
  -7  -2 -12   16.70    5.00
  -7  -2 -12    4.10    3.90
   7   2  12    6.50    3.70
  -7   2 -12    9.50    4.30
   7  -2 -12    7.30    3.80
  -7   2 -12    4.70    4.50
  -7   2 -12    3.60    3.20
   8   2   0   99.99    7.90
  -8  -2   0  101.59   11.20
   8  -2   0  104.39    8.50
   8  -2   0  107.19    8.00
   8   2   0   98.49    7.70
  -8  -2   0  105.39    7.20
  -8   2   0  114.19   11.90
  -8   2   0   96.39    8.60
   8   2   0  100.19    7.20
  -8  -2   0  103.19    7.50
   8  -2   0  103.69    8.30
  -8   2   0  100.39    8.30
   8  -2   0  109.09    8.30
  -8  -2  -1   18.80    5.80
   8  -2   1   12.30    2.90
  -8  -2  -1   16.50    2.10
   8  -2   1   13.70    3.40
   8   2  -1   12.80    2.60
  -8  -2  -1   13.40    2.60
   8  -2   1   17.50    2.80
  -8   2   1   16.30    5.70
   8   2  -1   11.50    2.40
  -8   2   1   12.10    3.00
  -8   2   1   13.40    3.30
   8   2  -1   11.90    2.10
  -8  -2   1    7.80    1.80
   8  -2  -1   14.70    3.10
   8   2   1   15.30    2.10
   8  -2  -1   12.10    2.90
   8   2   1   17.50    2.70
  -8  -2   1   12.30    1.90
  -8   2  -1   12.40    6.00
   8  -2  -1   12.70    2.60
  -8  -2   1    8.90    4.50
   8  -2  -1   18.10    3.30
   8   2   1   14.70    2.70
  -8   2  -1   14.10    3.50
  -8   2  -1    8.60    2.40
  -8  -2  -2   61.39    4.90
  -8   2   2   58.19    9.20
  -8  -2  -2   59.79    5.50
   8  -2   2   67.39    6.10
   8   2  -2   66.29    4.80
   8   2  -2   71.89    5.20
   8   2  -2   58.99    5.50
  -8  -2  -2   60.19    9.80
   8  -2   2   61.09    6.30
  -8   2   2   55.49    6.10
   8  -2   2   57.79    5.30
  -8   2   2   51.69    5.70
   8  -2  -2   58.19    5.50
  -8  -2   2   66.69    5.20
   8   2   2   53.59    5.20
   8  -2  -2   61.89    5.70
   8   2   2   57.09    5.30
  -8   2  -2   56.69    5.70
   8  -2  -2   65.09    6.10
   8  -2  -2   58.09    5.60
  -8  -2   2   65.79    4.90
   8   2   2   58.49    4.90
  -8   2  -2   61.09    6.30
  -8   2  -2   65.49   10.40
  -8   2   3  220.78   15.90
   8   2  -3  222.08   15.60
  -8  -2  -3  219.98   19.80
   8  -2   3  217.28   15.00
  -8  -2  -3  215.28   14.90
  -8   2   3  217.88   18.60
  -8  -2  -3  232.78   15.40
   8   2  -3  212.98   14.70
   8  -2   3  220.98   15.60
   8  -2   3  209.08   16.00
   8   2  -3  204.68   14.80
  -8   2   3  243.38   15.90
  -8   2  -3  237.78   15.60
   8  -2  -3  222.08   15.60
  -8   2  -3  230.38   16.10
   8   2   3  226.08   15.10
   8  -2  -3  236.78   15.70
  -8  -2   3  216.98   14.90
   8   2   3  234.48   15.00
   8  -2  -3  230.68   15.60
  -8   2  -3  212.08   19.80
   8  -2  -3  214.98   15.50
  -8  -2   3  216.88   14.90
   8   2  -4   10.30    2.40
   8  -2   4    6.90    3.50
   8   2  -4    8.30    2.40
   8  -2   4    9.70    2.80
  -8  -2  -4    5.10    2.40
  -8  -2  -4    5.60    1.80
  -8   2   4    5.00    2.40
  -8  -2  -4   12.90    7.10
  -8   2   4    3.70    2.80
   8  -2   4    8.80    2.00
   8   2   4    8.40    2.10
   8  -2  -4    7.90    2.70
   8   2   4    4.90    2.00
   8  -2  -4    6.00    2.80
   8  -2  -4    7.00    2.40
  -8   2  -4   11.50    3.50
  -8  -2   4    9.80    3.10
   8  -2  -4    5.40    2.20
  -8  -2   4   10.10    2.20
  -8   2  -4   10.50    6.60
  -8   2  -4   13.40    2.90
   8   2  -5   17.80    3.00
   8  -2   5   19.40    3.70
   8  -2   5   15.30    2.40
  -8   2   5   11.50    3.50
   8   2  -5   16.70    3.20
  -8  -2  -5   11.20    7.30
  -8  -2  -5   12.80    3.30
  -8  -2  -5   10.30    2.50
  -8   2   5    7.70    3.00
  -8   2   5   14.40    3.20
   8  -2  -5   10.90    2.90
   8   2   5   14.90    2.40
   8  -2  -5   15.20    3.50
   8   2   5   13.40    2.80
  -8   2  -5   15.60    3.90
  -8  -2   5   17.10    3.10
  -8   2  -5   15.80    7.90
  -8   2  -5   20.00    3.50
   8  -2  -5   13.40    3.30
   8  -2  -5   11.40    3.00
   8   2  -6  153.08   10.90
  -8   2   6  132.79   11.50
   8   2  -6  149.79   11.10
  -8  -2  -6  130.99   10.70
  -8  -2  -6  143.89   11.40
  -8   2   6  139.79   11.30
  -8  -2  -6  137.19   15.50
   8  -2   6  139.49   11.40
  -8   2   6  140.99   10.80
  -8   2  -6  148.69   11.80
  -8  -2   6  151.08   11.10
  -8   2  -6  155.68   16.40
   8  -2  -6  142.89   11.40
  -8   2  -6  138.49   11.20
   8  -2  -6  127.49   10.90
   8  -2  -6  154.28   11.40
   8  -2  -6  135.89   10.80
   8   2   6  144.29   10.80
   8   2  -7   11.00    2.90
  -8  -2  -7   11.90    6.20
  -8   2   7   10.50    3.50
  -8  -2  -7   10.60    3.40
   8   2  -7    9.80    2.90
   8  -2   7    7.40    3.10
  -8   2   7    7.00    2.90
   8   2   7    5.80    2.60
  -8   2  -7   10.70    3.60
  -8  -2   7   11.80    3.10
  -8   2  -7   12.90    3.10
   8  -2  -7   10.80    3.00
   8  -2  -7    9.90    2.80
  -8   2  -7   14.90    6.70
   8  -2  -7    9.90    3.20
   8  -2  -7    8.50    2.90
   8  -2   8   46.50    6.20
  -8   2   8   44.30    6.70
   8   2  -8   34.70    4.90
  -8  -2  -8   31.30    7.90
   8   2  -8   52.09    6.20
  -8  -2  -8   31.80    5.40
  -8   2   8   32.80    5.50
  -8   2  -8   41.30    9.10
   8  -2  -8   33.90    5.40
   8   2   8   29.20    4.90
  -8   2  -8   27.70    5.50
   8  -2  -8   32.70    5.00
  -8   2  -8   46.20    6.20
   8  -2  -8   29.30    5.00
   8  -2  -8   31.70    4.80
  -8  -2  -9    0.30    2.90
  -8   2   9    4.40    2.90
   8   2  -9    5.30    2.90
  -8  -2  -9   12.90    5.50
   8  -2   9    8.90    3.90
   8   2  -9    8.60    3.30
   8  -2  -9    5.10    2.60
  -8   2  -9   11.70    5.70
  -8   2  -9    8.50    3.40
  -8   2  -9   10.20    4.20
   8  -2  -9   10.70    3.50
   8  -2  -9    6.50    3.00
   8   2   9    4.10    2.90
  -8   2  10    9.20    3.80
   8   2 -10    9.00    3.50
   8  -2  10   -2.50    2.40
   8   2 -10    2.30    2.60
  -8  -2 -10   -1.50    3.00
  -8  -2 -10    4.60    3.90
  -8   2 -10   -3.10    3.10
  -8   2 -10    2.30    2.60
   8  -2 -10   -0.40    2.40
  -8   2 -10    6.80    4.10
   8  -2 -10    8.40    3.60
   8   2  10    0.60    2.90
  -8   2  11    4.80    3.60
   8   2 -11    7.50    3.80
  -8  -2 -11   17.40    5.40
   8  -2  11    5.40    3.60
  -8  -2 -11   -3.10    2.90
  -8   2 -11    0.60    3.50
  -8   2 -11   17.90    5.90
  -8   2 -11    0.50    2.70
   8  -2 -11    6.60    3.60
   8   2  11    2.80    3.40
  -8  -2 -12   17.90    5.70
  -8  -2 -12   37.80    8.10
   8   2 -12   35.20    6.70
   8  -2  12   21.20    5.40
  -8   2 -12   28.70   10.50
  -8   2 -12   26.60    7.30
   8  -2 -12   33.70    6.70
  -8   2 -12   18.50    5.90
   8   2  12   20.60    5.60
  -9  -2   0   23.20    6.40
   9  -2   0   22.00    3.90
   9  -2   0   23.00    4.00
   9  -2   0   19.30    3.40
   9   2   0   28.40    3.90
  -9   2   0   26.40    4.00
   9   2   0   22.90    2.80
  -9   2   0   19.60    7.20
  -9  -2   0   23.70    3.10
  -9   2   0   21.90    4.30
  -9   2   1   18.70    3.90
   9  -2   1   16.20    3.80
  -9  -2  -1   14.60    3.10
  -9   2   1   16.80    6.60
   9   2  -1   19.80    2.70
  -9  -2  -1   18.90    6.30
   9  -2   1   18.30    3.60
  -9   2   1   13.10    3.60
   9  -2   1   16.40    3.20
   9   2  -1   15.10    3.00
   9   2   1   20.70    2.60
  -9   2  -1   17.70    3.30
   9   2   1   10.70    2.60
  -9   2  -1   14.20    4.00
   9  -2  -1   17.80    3.70
  -9  -2   1   11.60    5.70
  -9   2  -1   13.60    6.80
   9  -2  -1   19.60    3.50
  -9  -2   1   14.50    2.40
   9  -2  -1   16.20    3.70
   9  -2  -1   19.40    3.50
   9  -2   2   18.10    3.60
  -9   2   2   14.40    6.10
  -9   2   2   18.20    3.90
   9  -2   2   20.40    4.20
   9   2  -2   16.10    3.30
  -9   2   2   20.80    3.90
  -9  -2  -2   13.40    3.20
   9   2  -2   24.40    3.20
   9  -2   2   22.00    3.20
  -9  -2  -2   12.20    6.90
   9  -2  -2   16.50    3.70
   9   2   2   14.70    2.90
   9   2   2   15.50    2.50
  -9   2  -2   24.40    7.80
  -9   2  -2   23.80    4.60
  -9  -2   2   19.10    6.50
   9  -2  -2   18.20    3.40
  -9  -2   2   27.90    3.10
   9  -2  -2   14.20    3.40
   9  -2  -2   11.20    3.00
  -9   2  -2   28.40    3.90
  -9   2   3  114.89   12.90
   9  -2   3  118.09    8.70
  -9   2   3  106.89    9.30
   9   2  -3  115.59    9.20
   9  -2   3  118.09    9.90
   9  -2   3  121.99    9.40
   9   2  -3  112.49    8.60
  -9  -2  -3  110.49    8.90
  -9  -2  -3  111.39   13.50
  -9   2   3  119.89    9.70
  -9   2  -3  110.29   13.90
   9   2   3  121.99    8.80
   9  -2  -3  102.89    8.90
   9   2   3  110.69    8.40
   9  -2  -3  114.09    9.20
   9  -2  -3  109.39    9.20
   9  -2  -3  121.19    9.40
  -9   2  -3  114.79    9.10
  -9   2  -3  122.39    9.90
  -9  -2   3  114.29    8.40
  -9   2   4  225.08   16.30
   9   2  -4  236.18   15.50
  -9   2   4  218.88   16.30
   9  -2   4  240.98   16.80
  -9  -2  -4  214.28   20.80
   9  -2   4  207.28   16.00
  -9  -2  -4  219.28   15.90
   9  -2   4  228.58   15.40
   9   2  -4  208.58   16.00
  -9   2  -4  232.48   16.10
   9   2   4  224.18   15.40
  -9  -2   4  233.08   15.60
   9  -2  -4  217.28   15.90
   9  -2  -4  225.88   16.10
   9  -2  -4  229.38   16.10
   9   2   4  218.78   15.40
  -9   2  -4  240.78   16.70
   9  -2  -4  216.78   16.00
  -9   2  -4  230.98   21.80
   9  -2   5  171.58   12.00
   9  -2   5  148.29   10.70
  -9  -2  -5  121.69   16.20
  -9   2   5  146.79   11.90
   9  -2   5  168.28   12.70
   9   2  -5  143.79   11.50
  -9   2   5  147.29   12.00
  -9  -2  -5  148.19   11.60
  -9   2   5  127.79   11.30
   9   2  -5  171.58   11.40
   9  -2  -5  132.69   11.50
  -9   2  -5  164.98   11.70
  -9   2  -5  151.08   16.80
   9  -2  -5  147.09   11.60
   9   2   5  137.19   10.70
   9   2   5  160.18   11.30
  -9   2  -5  172.18   12.50
   9  -2  -5  146.39   11.60
   9  -2  -5  125.39   11.30
  -9  -2   5  163.88   11.30
  -9   2   6   15.40    4.10
  -9   2   6   14.50    3.70
   9   2  -6   21.40    3.80
  -9  -2  -6   19.50    4.10
  -9  -2  -6   15.00    7.60
   9  -2   6   23.90    4.30
  -9   2   6   17.80    3.70
   9   2  -6   21.10    4.00
   9  -2  -6   18.50    3.70
  -9   2  -6   20.30    4.00
  -9  -2   6   24.60    4.00
   9   2   6   18.80    3.40
  -9   2  -6   27.70    5.20
   9  -2  -6   11.90    3.30
   9  -2  -6   18.00    3.90
  -9   2  -6   18.60    7.60
   9  -2  -6   19.30    3.90
   9   2  -7   29.30    4.70
  -9   2   7   25.50    4.90
  -9  -2  -7   27.10    8.20
  -9  -2  -7   17.30    4.30
   9  -2   7   40.30    5.40
   9   2  -7   44.10    5.10
   9  -2  -7   22.20    4.40
   9   2   7   21.30    4.00
  -9   2  -7   25.90    5.30
   9  -2  -7   30.90    5.10
  -9   2  -7   33.10    4.80
  -9   2  -7   24.10    8.10
  -9  -2   7   42.00    5.30
   9  -2  -7   21.50    4.00
  -9   2   8   14.30    4.00
   9   2  -8   17.00    3.80
   9   2  -8   17.10    3.90
  -9  -2  -8   15.80    6.30
  -9  -2  -8   14.90    4.10
   9  -2   8   14.00    4.00
   9   2   8   13.00    3.70
  -9   2  -8   16.70    7.10
   9  -2  -8   12.10    3.50
   9  -2  -8    8.90    3.00
  -9   2  -8   14.20    3.80
   9  -2  -8   19.50    4.40
  -9   2  -8   10.10    4.30
   9   2  -9    2.50    2.70
  -9  -2  -9    5.90    3.60
   9  -2   9    2.20    3.00
   9   2  -9    3.80    2.90
  -9  -2  -9    8.30    5.10
  -9   2   9    0.90    3.00
  -9   2  -9    5.30    3.30
   9  -2  -9    8.10    3.60
   9   2   9    3.90    2.90
  -9   2  -9    1.30    3.40
  -9   2  -9    2.30    4.60
  -9   2  10   -0.80    2.90
  -9  -2 -10    0.50    3.50
   9   2 -10    9.20    3.70
  -9  -2 -10   17.40    5.60
   9   2 -10    2.40    2.90
   9  -2  10    2.60    3.30
  -9   2 -10   14.60    5.60
   9  -2 -10    6.50    3.30
   9  -2 -10   13.00    4.30
   9   2  10    5.70    3.30
  -9   2 -10    8.20    4.40
  -9  -2 -11   26.00    6.90
   9  -2  11   10.40    4.70
   9   2 -11   17.70    4.80
  -9  -2 -11    6.30    4.20
  -9   2  11    6.40    4.20
  -9   2 -11   13.40    5.20
   9  -2 -11    9.80    4.30
  -9   2 -11   23.30    7.10
   9   2  11    8.20    3.90
   9  -2  12   22.40    5.90
   9   2 -12   31.30    6.10
  -9  -2 -12   23.70    6.60
   9   2  12   29.60    6.20
  -9   2 -12   27.60    6.60
 -10   2   0    8.00    3.10
  10   2   0    9.50    2.10
  10  -2   0    9.40    3.30
 -10   2   0    8.10    6.90
 -10   2   0    9.10    3.50
 -10  -2   0   10.20    6.40
 -10  -2   0    8.90    2.30
  10  -2   0    7.90    2.60
  10  -2   0    7.70    2.90
  10   2   0   10.00    2.80
  10  -2   1   34.20    5.10
  10  -2   1   19.80    3.50
 -10  -2  -1   30.50    7.80
  10  -2   1   31.60    4.50
  10   2  -1   29.40    3.50
 -10   2   1   29.60    4.80
 -10  -2  -1   28.70    3.90
 -10   2   1   29.20    7.90
 -10   2   1   28.70    4.50
  10   2  -1   31.40    4.30
 -10  -2   1   23.50    3.20
  10  -2  -1   26.70    4.30
  10  -2  -1   24.80    4.00
  10   2   1   34.60    3.40
 -10  -2   1   29.90    7.40
  10  -2  -1   34.80    4.80
 -10   2  -1   28.60    5.00
 -10   2  -1   34.40    9.30
 -10   2  -1   29.90    4.30
  10   2   1   37.00    4.50
 -10  -2  -2   10.30    6.80
 -10  -2  -2   10.90    3.00
  10  -2   2    7.20    3.20
  10  -2   2    4.60    2.20
  10  -2   2   11.70    3.80
  10   2  -2    4.80    2.50
 -10   2   2    8.40    3.10
 -10   2   2    8.60    5.50
 -10   2   2    4.40    3.30
  10   2  -2    9.50    2.50
 -10   2  -2   10.60    2.80
 -10  -2   2    3.90    4.90
 -10  -2   2    9.20    2.10
 -10   2  -2   11.30    7.50
  10   2   2   10.20    2.90
 -10   2  -2    5.50    3.60
  10  -2  -2   10.00    2.70
  10  -2  -2    7.50    2.70
  10   2   2    9.70    2.20
  10  -2  -2   13.80    3.50
  10  -2  -2    4.90    2.80
  10  -2   3   35.70    4.90
 -10   2   3   24.90    7.80
  10  -2   3   35.00    5.60
 -10  -2  -3   29.70    9.40
  10  -2   3   36.30    4.40
  10   2  -3   34.40    4.80
 -10  -2  -3   34.30    4.60
  10   2  -3   34.30    4.20
 -10   2   3   38.70    5.20
  10   2   3   30.60    4.10
  10  -2  -3   35.50    5.10
  10  -2  -3   26.20    4.70
 -10  -2   3   30.20    7.60
  10  -2  -3   35.20    4.90
 -10  -2   3   37.60    3.80
 -10   2  -3   31.70    4.50
 -10   2  -3   34.00    5.50
 -10   2  -3   34.20   10.30
  10   2   3   42.80    4.00
 -10  -2  -4  117.39   15.50
  10  -2   4  120.49    9.20
 -10  -2  -4  115.89    9.80
  10  -2   4  113.09   10.50
  10   2  -4  117.89    9.80
  10  -2   4  132.89   10.00
 -10   2   4  110.59   13.70
  10   2  -4  123.09    9.30
 -10   2   4  110.59    9.90
  10  -2  -4  103.09    9.80
  10  -2  -4  119.89   10.00
 -10   2  -4  139.49   16.70
  10   2   4  112.69    9.00
 -10   2  -4  122.19    9.70
 -10   2  -4  128.29   10.60
 -10  -2   4  123.19    9.20
  10   2   4  131.09    9.40
  10  -2  -4  113.59    9.80
  10  -2   5   30.90    4.20
 -10   2   5   40.80    5.70
  10   2  -5   35.20    4.50
 -10  -2  -5   29.60    9.80
  10   2  -5   36.80    5.30
 -10  -2  -5   36.80    5.30
  10  -2   5   37.90    5.90
 -10   2   5   38.50    5.40
  10  -2   5   35.30    5.10
  10  -2  -5   32.40    5.20
  10   2   5   34.00    4.40
  10   2   5   33.30    4.30
  10  -2  -5   35.60    5.10
 -10   2  -5   29.30    5.40
 -10   2  -5   35.50    4.90
 -10   2  -5   33.90   10.50
 -10  -2   5   33.50    4.40
  10  -2  -5   32.10    5.10
 -10  -2  -6   34.70   10.20
  10   2  -6   36.60    4.90
  10  -2   6   43.00    5.70
 -10   2   6   27.90    5.00
 -10   2   6   30.90    6.90
 -10  -2  -6   27.70    5.00
  10   2  -6   34.30    5.10
  10  -2   6   34.10    6.70
  10  -2  -6   28.40    4.60
 -10   2  -6   34.00    5.80
 -10   2  -6   25.70    9.40
  10   2   6   25.80    4.20
  10  -2  -6   26.40    4.60
  10  -2  -6   29.50    5.00
 -10  -2   6   31.00    4.60
  10  -2   7   42.90    6.40
  10   2  -7   64.29    6.80
 -10  -2  -7   49.20   11.10
 -10  -2  -7   37.40    6.00
 -10   2   7   42.30    6.60
  10   2  -7   51.29    6.60
 -10   2  -7   53.89    7.50
 -10  -2   7   56.19    6.00
  10   2   7   39.10    5.60
  10  -2  -7   52.19    6.70
 -10   2  -7   51.59   11.50
  10  -2  -7   56.89    6.80
  10  -2  -7   51.59    6.30
 -10  -2  -8    4.10    3.50
 -10   2   8   -3.90    2.30
 -10  -2  -8    2.60    6.00
  10   2  -8    2.10    2.70
  10   2  -8    1.10    2.60
  10  -2   8    4.20    3.20
 -10   2  -8    5.90    5.70
  10  -2  -8    3.50    2.70
  10   2   8    1.20    2.50
  10  -2  -8    4.40    2.90
  10  -2  -8    4.10    3.30
 -10   2  -8   -0.30    3.60
 -10  -2  -9    8.60    5.80
 -10  -2  -9   -3.40    2.70
  10   2  -9    3.30    3.30
  10  -2   9   -0.60    3.00
  10   2  -9    7.10    3.30
 -10   2   9    4.50    3.30
 -10   2  -9    2.90    3.80
  10  -2  -9   -2.00    2.80
  10   2   9    3.90    2.60
 -10   2  -9    3.40    5.00
  10  -2  -9    5.60    3.60
  10   2 -10    3.10    3.30
  10  -2  10    0.90    3.40
 -10  -2 -10   10.40    4.80
  10   2 -10    7.00    3.60
 -10  -2 -10    0.50    3.50
 -10   2  10    4.20    3.60
 -10   2 -10    2.70    4.10
 -10   2 -10    5.90    4.60
  10   2  10    3.00    2.90
  10  -2 -10    5.60    3.70
  10  -2 -10   -1.90    2.90
 -10  -2 -11    7.00    4.70
  10   2 -11   13.10    4.40
 -10   2  11   -0.20    3.30
  10  -2  11   -3.30    3.40
 -10   2 -11    5.20    4.50
  10  -2 -11    6.40    4.70
  10   2  11   12.80    4.40
  11   2   0   56.69    5.90
 -11   2   0   52.69    7.00
 -11   2   0   52.89   11.30
  11   2   0   57.19    5.10
 -11  -2   0   62.09    5.40
  11  -2   0   56.49    5.90
 -11  -2   0   74.09   12.10
  11  -2   0   63.59    6.90
 -11   2   1    0.50    2.80
  11   2  -1    5.70    2.80
  11   2  -1    5.30    2.10
 -11  -2  -1    2.60    2.30
 -11  -2  -1    2.50    5.70
 -11   2   1    6.80    5.90
  11  -2   1    7.70    2.60
  11  -2   1    9.10    3.30
  11  -2  -1    5.20    2.60
  11  -2  -1    5.50    3.20
  11   2   1    4.20    1.90
 -11  -2   1    6.70    2.00
 -11  -2   1   10.90    6.70
 -11   2  -1    6.80    3.60
  11   2   1    1.20    2.10
 -11   2  -1    8.70    7.20
 -11  -2  -2   15.90    7.80
  11  -2   2    5.10    3.10
  11   2  -2    9.00    3.10
  11  -2   2    5.40    2.30
 -11   2   2   13.90    3.50
 -11  -2  -2   15.20    3.40
  11   2  -2   11.10    2.60
 -11   2   2   12.00    6.80
 -11  -2   2   16.20    6.70
  11  -2  -2    7.70    2.70
  11   2   2   18.50    2.70
 -11   2  -2   12.40    7.70
  11   2   2   11.90    3.20
  11  -2  -2   17.90    4.00
 -11   2  -2   12.30    4.00
 -11  -2   2    9.30    2.20
 -11   2   3    9.30    6.40
 -11   2   3   15.10    3.70
 -11  -2  -3   15.80    8.60
  11  -2   3   13.10    3.60
  11  -2   3    3.60    2.50
  11   2  -3   13.40    3.00
 -11  -2  -3   12.00    3.60
  11   2  -3    5.60    3.10
  11   2   3   12.10    3.10
  11  -2  -3    9.00    3.40
 -11  -2   3   15.60    2.70
  11   2   3   10.50    2.50
  11  -2  -3    5.20    2.80
 -11  -2   3   13.70    6.90
 -11   2  -3   14.30    8.10
 -11   2  -3   14.90    4.40
 -11  -2  -4   66.29   13.10
  11   2  -4   51.59    5.60
 -11   2   4   64.29    6.60
 -11   2   4   44.50    9.80
  11  -2   4   56.69    6.60
  11  -2   4   58.19    5.70
  11   2  -4   56.39    6.80
 -11  -2  -4   58.09    6.30
  11   2   4   57.39    5.50
  11  -2  -4   55.09    6.70
 -11   2  -4   60.69    7.50
 -11   2  -4   58.79   12.30
  11  -2  -4   60.99    7.30
  11   2   4   57.89    5.80
  11  -2  -4   51.19    6.60
 -11  -2   4   56.79    5.40
 -11   2   5   79.29    7.50
  11  -2   5   71.39    7.50
  11   2  -5   69.79    6.70
  11   2  -5   68.29    7.80
 -11  -2  -5   73.89   13.50
 -11   2   5   77.59    7.50
 -11  -2  -5   66.09    7.20
  11  -2   5   62.89    6.20
 -11   2   5   71.19   12.10
  11   2   5   68.89    6.40
  11  -2  -5   72.69    7.80
 -11   2  -5   73.99   14.10
  11   2   5   68.29    6.50
 -11  -2   5   71.29    6.50
  11  -2  -5   73.59    7.20
  11  -2  -5   58.69    7.40
 -11   2  -5   77.79    8.20
 -11  -2  -6   37.80   11.30
  11  -2   6   43.30    6.00
 -11  -2  -6   36.10    5.80
  11   2  -6   45.40    6.00
 -11   2   6   43.50    6.10
  11   2  -6   41.10    5.30
  11  -2  -6   36.90    5.60
  11  -2  -6   39.20    5.90
  11  -2  -6   37.40    5.60
 -11   2  -6   46.40    6.60
 -11  -2   6   39.00    5.30
 -11   2  -6   39.80   10.70
  11   2   6   33.00    4.90
  11  -2   7   33.20    5.70
  11   2  -7   29.90    4.90
 -11  -2  -7   34.60   10.10
 -11  -2  -7   32.40    5.80
  11   2  -7   28.30    5.30
 -11   2   7   36.20    6.00
 -11   2  -7   29.70    6.00
 -11   2  -7   28.90    9.50
  11  -2  -7   26.30    5.10
  11  -2  -7   45.00    6.30
 -11  -2   7   29.30    4.90
  11   2   7   35.70    5.30
 -11  -2  -8    7.70    6.40
 -11  -2  -8    0.70    3.20
  11   2  -8    4.80    3.00
 -11   2   8    5.30    3.30
  11   2  -8    1.90    3.40
  11  -2   8   -0.30    3.10
  11  -2  -8    1.80    3.10
 -11   2  -8    4.30    3.90
  11   2   8   -2.00    2.30
 -11   2  -8    0.60    6.30
  11  -2  -8    0.70    3.20
 -11  -2  -9   17.30    5.10
  11   2  -9   15.00    4.30
  11   2  -9   15.50    4.40
 -11   2   9   17.30    4.90
 -11  -2  -9   32.70    8.80
  11  -2   9   11.90    4.50
 -11   2  -9   21.20    5.90
  11  -2  -9   28.30    5.80
  11  -2  -9   29.00    5.60
 -11   2  -9   13.80    7.40
  11   2   9   18.70    4.40
 -11   2  10   14.50    5.00
  11   2 -10    9.90    4.20
  11   2 -10   15.10    4.70
  11  -2  10   15.70    4.90
 -11  -2 -10   17.90    6.10
 -11  -2 -10    7.30    4.60
 -11   2 -10    5.60    4.80
  11   2  10   12.10    4.10
 -11   2 -10   24.60    8.20
  11  -2 -10   19.50    5.40
  11  -2 -10   16.80    4.50
 -12   2   0   28.60    8.90
  12  -2   0   21.20    4.30
 -12   2   0   23.60    4.70
 -12  -2   0   18.50    8.00
  12   2   0   26.50    4.30
  12  -2   0   31.20    4.90
  12   2   0   26.20    3.40
 -12  -2   0   24.90    3.60
 -12  -2  -1    7.70    2.50
 -12   2   1   10.40    6.90
 -12  -2  -1    5.00    6.80
  12  -2   1    9.70    3.40
  12   2  -1    6.70    2.90
  12  -2   1    5.60    2.80
  12   2  -1   11.60    2.50
 -12   2   1    7.30    3.20
  12  -2  -1    6.20    2.80
  12  -2  -1    7.60    3.40
 -12   2  -1    6.70    3.70
 -12  -2   1    5.10    6.00
  12   2   1    7.70    2.10
  12   2   1    7.80    2.70
 -12   2  -1   10.50    7.20
 -12  -2   1   10.80    2.40
 -12  -2  -2   19.40    3.90
  12  -2   2   21.20    4.40
 -12   2   2   29.30    4.80
  12   2  -2   24.50    3.70
 -12   2   2   20.10    8.50
  12  -2   2   24.00    4.20
 -12  -2  -2   19.80    9.00
  12   2  -2   30.90    4.80
 -12   2  -2   27.10   10.30
  12   2   2   22.40    3.30
 -12  -2   2   31.50    3.60
  12  -2  -2   25.00    4.50
  12   2   2   23.90    4.40
 -12  -2   2   18.80    7.80
  12  -2  -2   19.30    4.40
 -12   2  -2   23.70    5.10
  12   2  -3   56.29    5.50
  12  -2   3   56.79    6.60
 -12  -2  -3   44.40   11.40
 -12  -2  -3   57.99    6.50
 -12   2   3   45.80   10.30
 -12   2   3   40.60    6.20
  12   2  -3   42.20    6.10
  12  -2   3   61.89    6.00
  12   2   3   50.59    5.00
  12  -2  -3   59.99    6.80
  12  -2  -3   47.80    6.50
 -12   2  -3   51.69    7.10
 -12  -2   3   49.40    4.80
 -12   2  -3   60.69   12.80
  12   2   3   49.20    5.90
 -12  -2   3   45.40   10.30
  12   2  -4   14.50    3.70
  12   2  -4   13.90    3.20
  12  -2   4   15.80    3.30
 -12  -2  -4    1.10    6.50
 -12  -2  -4   10.40    3.70
 -12   2   4   11.60    7.20
 -12   2   4   13.30    3.60
  12  -2   4   15.10    3.80
  12  -2  -4    7.40    3.10
  12   2   4   11.20    2.80
 -12   2  -4   10.90    4.20
  12   2   4   13.00    3.30
 -12  -2   4   21.90    3.30
  12  -2  -4    5.80    3.40
 -12   2  -4   19.30   10.10
 -12  -2   4    9.30    5.90
 -12  -2  -5   65.79    7.40
 -12   2   5   69.19    7.10
  12   2  -5   51.19    7.00
 -12   2   5   56.09    7.40
  12  -2   5   50.89    6.90
  12   2  -5   57.79    6.30
 -12  -2  -5   54.89   12.80
 -12   2   5   61.19   12.20
  12   2   5   58.69    6.10
  12  -2  -5   52.39    7.00
 -12   2  -5   57.19    7.80
  12  -2  -5   56.99    7.50
 -12   2  -5   66.99   14.30
 -12  -2   5   67.19    6.00
  12   2  -6   71.99    9.00
 -12  -2  -6   74.09    8.40
 -12  -2  -6   88.99   15.50
 -12   2   6   77.99   13.60
  12  -2   6   90.09    8.90
  12   2  -6   97.49    8.20
 -12   2   6   87.79    8.70
  12  -2  -6   80.69    8.70
 -12  -2   6  101.19    8.10
  12  -2  -6   75.69    9.10
 -12   2  -6  114.79   18.00
 -12   2  -6   90.59    9.40
 -12   2   7    8.00    3.50
 -12  -2  -7    0.40    6.90
 -12  -2  -7   -0.10    3.40
  12   2  -7    6.20    3.10
  12  -2   7    5.60    3.70
  12   2  -7    3.30    3.50
  12  -2  -7    6.20    3.80
 -12   2  -7   -0.10    3.70
  12   2   7    4.70    2.90
 -12   2  -7   12.30    8.10
  12  -2  -7    2.70    3.30
 -12  -2   7    7.40    3.20
 -12   2   8   17.00    4.50
 -12  -2  -8   24.70    9.00
  12   2  -8   17.50    4.20
 -12  -2  -8    8.90    4.60
  12  -2   8   17.60    4.70
  12   2  -8   12.90    4.60
  12  -2  -8    7.70    3.80
 -12   2  -8    9.80    4.80
 -12   2  -8   22.90    8.80
  12   2   8   18.30    4.20
  12  -2  -8   16.30    4.70
 -12  -2  -9   36.90    9.70
  12   2  -9   38.90    5.90
  12   2  -9   23.20    5.50
  12  -2   9   29.40    6.20
 -12  -2  -9   25.20    5.90
 -12   2   9   25.80    6.00
  12  -2  -9   29.20    5.90
 -12   2  -9   41.70   10.70
  12   2   9   24.90    5.10
 -12   2  -9   26.70    6.40
  12  -2  -9   30.50    6.10
  12  -2  10    7.30    4.40
 -12   2  10    5.40    4.20
 -12  -2 -10   19.40    7.00
  12   2 -10   10.90    4.20
 -12  -2 -10    7.00    4.60
  12   2 -10    2.30    4.00
 -12   2 -10   11.00    5.40
  12   2  10    7.90    3.80
  12  -2 -10    4.90    3.60
  12  -2 -10    6.60    4.20
 -12   2 -10   13.90    5.90
  13  -2   0   28.00    4.90
 -13   2   0   17.80    4.40
 -13   2   0   23.30    9.70
  13   2   0   27.60    4.90
 -13  -2   0   31.80    3.90
 -13  -2   0   39.20   10.40
  13   2   0   25.70    3.50
  13  -2   0   28.90    4.90
  13   2  -1   19.10    4.00
  13  -2   1   21.40    4.40
  13  -2   1   20.80    4.30
 -13  -2  -1   17.10    8.50
 -13   2   1   34.10    5.20
 -13  -2  -1   20.50    3.50
 -13   2   1   26.70    9.10
  13   2  -1   12.70    3.00
  13  -2  -1   21.00    4.30
  13   2   1   19.80    4.10
 -13  -2   1   15.20    7.20
 -13  -2   1   26.20    3.50
 -13   2  -1   16.10    4.40
  13   2   1   23.10    3.10
  13  -2  -1   29.90    4.90
 -13   2  -1   22.10    9.30
  13  -2   2   59.09    7.10
 -13   2   2   65.19   13.10
  13   2  -2   62.09    7.30
 -13  -2  -2   61.39    6.40
 -13  -2  -2   63.99   13.00
  13   2  -2   61.79    5.90
  13  -2   2   58.29    7.00
 -13   2   2   76.79    7.30
  13  -2  -2   74.79    7.40
  13   2   2   60.89    7.20
 -13  -2   2   62.49   11.70
  13   2   2   70.49    5.80
  13  -2  -2   65.79    7.90
 -13   2  -2   55.29    7.80
 -13   2  -2   64.49   14.30
 -13  -2   2   72.39    5.90
  13   2  -3   28.90    4.10
 -13  -2  -3   21.10    4.30
 -13   2   3   31.30    9.60
 -13   2   3   33.70    5.50
  13   2  -3   20.20    4.40
  13  -2   3   37.20    5.40
 -13  -2  -3   24.80   10.30
  13  -2   3   23.50    4.50
  13  -2  -3   22.60    4.70
 -13   2  -3   31.10   11.20
 -13   2  -3   27.90    5.50
 -13  -2   3   34.50    4.10
 -13  -2   3   27.70    8.80
  13  -2  -3   35.90    5.40
  13   2   3   29.30    4.80
  13   2   3   33.10    4.00
 -13   2   4    2.60    2.80
  13  -2   4   -2.80    2.00
  13   2  -4   -0.80    2.70
 -13   2   4    3.40    6.60
 -13  -2  -4   -0.60    2.80
  13  -2   4    0.40    2.80
  13   2  -4    6.80    2.90
 -13  -2  -4   -1.00    7.40
 -13   2  -4    1.60    8.30
 -13  -2   4    3.50    5.70
 -13   2  -4    2.30    3.50
  13  -2  -4    2.90    3.10
  13   2   4    1.20    2.50
  13  -2  -4    0.80    3.40
  13   2   4   -0.10    2.00
 -13  -2   4    6.10    2.20
 -13  -2  -5    5.20    8.50
  13   2  -5    6.10    3.60
 -13   2   5   12.10    8.00
 -13  -2  -5    8.00    3.60
 -13   2   5    9.70    3.80
  13   2  -5   16.70    3.60
  13  -2   5    9.70    3.80
 -13  -2   5   17.60    7.70
  13  -2  -5    3.50    3.70
  13  -2  -5    0.00    2.90
 -13   2  -5    8.70    4.40
 -13  -2   5   11.50    2.80
 -13   2  -5    1.80    7.40
  13   2   5    7.00    2.80
 -13   2   6   11.80    3.80
  13  -2   6    8.20    3.90
 -13  -2  -6   12.90    4.10
  13   2  -6    8.40    3.80
 -13  -2  -6    8.20    7.90
 -13   2   6   10.10    7.60
  13   2  -6    8.90    3.20
  13   2   6    6.20    2.80
 -13   2  -6    6.40    4.10
  13  -2  -6    6.40    3.70
 -13  -2   6    8.90    2.90
 -13   2  -6   10.30    9.40
  13  -2  -6    2.00    3.50
 -13   2   7   16.70    7.50
 -13   2   7   13.30    4.20
 -13  -2  -7   15.10    8.80
  13   2  -7   17.30    4.00
 -13  -2  -7    4.10    3.90
  13   2  -7   -0.80    3.20
  13  -2   7   11.00    4.20
  13  -2  -7    4.60    4.00
 -13  -2   7    6.90    3.20
  13  -2  -7    4.10    4.10
  13   2   7    9.20    3.30
 -13   2  -7    0.60    8.00
 -13   2  -7    4.60    4.20
 -13  -2  -8   34.80   10.60
 -13   2   8   23.60    5.50
 -13  -2  -8   27.50    5.80
  13   2  -8   15.40    5.30
  13   2  -8   17.60    4.30
  13  -2   8   23.30    5.60
  13   2   8   29.70    5.20
  13  -2  -8   20.70    5.50
  13  -2  -8   27.70    5.60
 -13   2  -8   13.00    5.40
 -13   2  -8   26.30   10.20
 -13  -2  -9   15.70    8.00
 -13   2   9    4.10    3.60
  13   2  -9    2.10    3.90
 -13  -2  -9   -2.80    3.90
  13  -2   9    2.90    3.80
  13   2  -9    7.30    3.80
  13  -2  -9    8.90    4.30
 -13   2  -9    7.40    7.00
  13  -2  -9    5.90    4.00
 -13   2  -9    4.40    4.70
  13   2   9    4.30    3.20
 -14   2   0   32.60    5.50
 -14   2   0   17.70    9.90
 -14  -2   0   31.10   10.40
  14   2   0   22.80    5.00
  14  -2   0   27.20    5.30
  14  -2   0   26.70    5.00
  14   2  -1    5.40    3.10
  14  -2   1    9.20    3.70
 -14  -2  -1    4.10    6.90
 -14   2   1   10.60    3.50
  14  -2   1    6.00    3.10
 -14   2   1    3.00    7.30
  14  -2  -1   11.70    4.10
 -14   2  -1    1.50    8.60
 -14  -2   1    5.00    7.50
  14   2   1    0.60    2.60
  14  -2  -1    6.20    3.70
 -14   2  -1   19.80    4.40
  14  -2   2    8.20    3.80
 -14  -2  -2   11.60    8.90
  14   2  -2    9.20    3.50
 -14   2   2   11.70    3.50
 -14  -2  -2    8.70    4.70
 -14   2   2    9.20    8.30
  14  -2   2    9.70    3.40
 -14  -2   2   10.10    7.10
  14   2   2    5.50    2.30
  14   2   2    7.40    3.10
 -14   2  -2    3.80    8.40
 -14   2  -2   13.10    4.30
  14  -2  -2    5.40    3.10
  14  -2  -2   10.90    4.10
  14  -2   3   12.60    4.10
  14   2  -3   11.60    4.00
 -14  -2  -3   27.70    4.50
 -14   2   3   12.90    8.40
  14  -2   3   17.20    4.10
 -14  -2  -3    8.70    9.10
 -14   2   3   36.40    5.60
 -14   2  -3   14.60    4.70
 -14   2  -3    9.10    9.50
  14   2   3   18.20    4.10
 -14  -2   3   10.60    7.70
  14  -2  -3   26.50    5.20
  14  -2  -3   22.90    5.00
  14   2   3   21.60    3.40
 -14   2   4   41.80   11.40
 -14  -2  -4   36.30   12.40
 -14  -2  -4   39.30    5.80
  14  -2   4   37.40    5.90
  14  -2   4   34.80    5.30
  14   2  -4   33.50    6.10
 -14   2   4   48.80    6.70
  14   2   4   39.90    4.90
 -14   2  -4   22.50   11.70
  14  -2  -4   44.20    6.30
 -14  -2   4   30.20    9.30
 -14   2  -4   44.50    6.80
  14   2   4   39.80    5.70
  14  -2  -4   43.60    6.70
  14   2  -5   40.60    6.70
  14  -2   5   39.00    6.30
 -14  -2  -5   40.60   12.70
 -14   2   5   49.80   12.20
 -14   2   5   52.69    6.90
 -14  -2  -5   43.50    6.40
  14   2   5   36.40    5.10
 -14   2  -5   41.60   13.10
 -14   2  -5   30.30    6.40
 -14  -2   5   45.70   11.40
  14  -2  -5   45.60    6.60
  14  -2  -5   27.40    5.90
 -14  -2  -6   15.10   10.40
  14  -2   6    5.80    4.00
  14   2  -6    7.60    4.00
 -14   2   6   15.40    9.20
 -14   2   6   20.60    4.70
 -14  -2  -6    9.80    4.10
  14  -2  -6    8.60    4.10
 -14   2  -6    8.00    4.60
  14   2   6   13.90    3.60
 -14   2  -6    9.90    9.20
 -14  -2   6   24.00    8.70
  14  -2  -6   14.60    4.60
 -14  -2  -7   14.90    4.80
 -14  -2  -7   15.70    9.90
 -14   2   7   12.20    4.30
  14  -2   7   15.90    4.90
  14   2  -7    7.60    4.50
 -14   2   7   27.80   10.00
  14  -2  -7   14.50    4.80
  14  -2  -7    9.70    4.70
  14   2   7   11.90    3.80
 -14   2  -7   17.00    9.30
 -14   2  -7   10.20    4.90
  14  -2   8    2.30    4.30
 -14   2   8    6.50    4.10
  14   2  -8    6.20    4.30
  14   2  -8    4.20    5.80
 -14   2   8   10.80    7.40
 -14  -2  -8    6.80    8.70
 -14  -2  -8    2.50    4.00
  14  -2  -8    4.10    4.00
 -14   2  -8    4.80    8.30
  14  -2  -8   -1.50    3.50
 -14   2  -8    2.20    4.50
  14   2   8    3.60    3.50
  15   2   0    2.10    3.00
 -15  -2   0   -0.40    7.80
 -15   2   0    9.70    3.60
  15  -2   0    4.60    3.30
 -15   2   0    5.50    9.00
  15  -2   0   -2.40    3.50
  15  -2   1   10.20    4.00
 -15  -2  -1    0.20    7.80
 -15   2   1    4.10    8.50
  15   2  -1    6.00    3.60
  15  -2   1    2.80    2.90
 -15   2   1   11.90    3.50
  15  -2  -1    4.70    3.70
  15  -2  -1    4.80    3.30
 -15   2  -1    1.80    9.30
 -15   2  -1    5.80    3.30
  15   2   1    2.00    2.90
 -15  -2   1    7.70    7.80
  15   2  -2    5.10    3.60
  15  -2   2   -1.20    3.30
 -15  -2  -2   10.70    9.70
 -15   2   2    1.50    8.30
  15  -2   2    5.90    3.40
 -15   2   2   11.20    3.40
  15   2   2    4.10    3.10
 -15   2  -2    9.10    4.00
  15  -2  -2    6.60    4.00
  15  -2  -2    8.80    3.70
 -15  -2   2    0.90    6.40
 -15   2  -2   -5.90    8.90
 -15   2   3   20.60    4.40
  15   2  -3   21.00    4.80
 -15   2   3   14.10    9.30
 -15  -2  -3   18.90   10.40
  15  -2   3   14.50    4.30
  15  -2   3   18.10    4.50
 -15  -2   3   16.10    9.10
  15  -2  -3   18.90    4.80
 -15   2  -3   15.70   11.00
  15   2   3    9.90    4.10
  15  -2  -3   22.80    5.30
 -15   2  -3    9.70    4.60
 -15  -2  -4   20.20   12.20
 -15   2   4   35.00    5.60
  15  -2   4   26.20    5.30
  15   2  -4   38.60    6.60
 -15   2   4   44.70   12.80
 -15  -2   4   28.30    9.90
  15  -2  -4   26.80    5.80
 -15   2  -4   25.60   11.20
 -15   2  -4   19.40    5.80
  15  -2  -4   32.30    5.90
 -15   2   5   10.20    3.60
  15  -2   5    2.90    3.50
 -15  -2  -5    3.00    5.50
 -15  -2  -5   -0.80    8.50
  15   2  -5   -0.80    3.60
 -15   2   5    1.90    7.30
  15   2   5    3.80    2.80
  15  -2  -5    2.80    3.70
  15  -2  -5    4.40    4.00
 -15   2  -5    2.20    9.00
 -15   2  -5    0.20    3.90
 -15  -2   5    5.60    7.60
 -15   2   6   18.10   10.00
 -15   2   6    9.90    3.60
 -15  -2  -6    8.20    4.30
  15  -2   6    2.00    4.00
  15   2  -6    3.80    4.30
 -15  -2  -6   -2.90    9.00
 -15   2  -6    4.40    4.60
  15  -2  -6   10.20    4.70
  15  -2  -6    2.80    4.00
 -15   2  -6    6.30   10.40
 -15  -2   6    8.90    7.40
  15   2   6    3.50    2.80
  15   2  -7   13.20    5.40
 -15   2   7   30.00    5.80
 -15  -2  -7   18.30    5.30
  15  -2   7   12.30    5.00
 -15   2   7   39.00   12.40
 -15  -2  -7   31.70   12.00
  15   2   7   21.20    4.60
  15  -2  -7   25.80    6.30
 -15   2  -7   25.50   12.00
  15  -2  -7   30.50    6.00
 -15   2  -7   25.00    6.50
 -15  -2   7   28.90    9.80
 -16  -2   0   26.70   11.30
  16   2   0   29.60    5.60
  16  -2   0   38.10    6.00
  16  -2   0   28.80    5.80
 -16   2   0   30.30   13.00
 -16   2   0   32.00    5.70
 -16  -2  -1   -1.00    7.70
  16  -2   1   -2.00    3.20
  16  -2   1   -0.80    3.30
 -16   2   1   13.00    3.50
 -16   2   1    1.20    8.90
  16   2  -1   -4.20    3.00
 -16  -2   1    4.30    9.10
  16  -2  -1    3.40    3.90
  16  -2  -1    4.00    3.50
 -16   2  -1    5.10    3.60
 -16   2  -1   -4.20   10.10
  16   2   1    2.80    3.70
  16   2  -2    1.50    3.50
 -16  -2  -2   -3.80    9.00
 -16   2   2    5.20   10.40
 -16   2   2   11.00    3.60
  16  -2   2    7.20    3.80
  16  -2   2    5.90    3.60
  16   2   2    2.70    3.30
 -16   2  -2   11.20    4.00
  16  -2  -2   13.40    4.60
 -16   2  -2   -1.30    8.50
 -16  -2   2   10.70    8.70
  16  -2  -2    1.20    3.80
 -16  -2  -3   -6.30    9.20
  16  -2   3    3.30    3.50
  16   2  -3   -1.30    3.70
  16  -2   3    3.60    3.40
 -16   2   3    5.80    3.10
 -16   2   3   18.70   11.80
  16  -2  -3    3.60    4.00
 -16  -2   3   -2.50    6.70
 -16   2  -3    4.40   11.50
  16  -2  -3   -5.70    3.30
  16   2   3   -0.70    3.50
 -16   2  -3   10.50    4.20
  16  -2   4   -2.10    3.50
 -16   2   4    2.20    3.10
  16   2  -4    2.30    3.70
 -16   2   4   13.90   10.90
 -16  -2  -4   -1.60    9.90
  16  -2  -4    0.90    4.00
 -16   2  -4    7.30    4.10
  16  -2  -4   -2.50    3.20
 -16   2  -4    2.70   10.10
 -16  -2   4   -3.50    8.10
  16   2  -5    8.60    5.10
 -16   2   5    5.90    3.20
 -16  -2  -5    7.40   10.50
  16  -2   5    1.00    3.80
 -16   2   5    1.00    9.50
 -16   2  -5    4.70   10.70
  16  -2  -5    7.10    4.60
 -16   2  -5    7.60    4.60
 -16  -2   5    5.90    8.70
  16  -2  -5    5.60    4.60
 -17  -2   0    7.10   10.60
  17  -2   0   10.20    4.50
  17  -2   0    7.40    4.60
 -17   2   0    6.40   12.20
  17   2   0    3.40    4.20
  17  -2   1   -2.40    3.60
 -17   2   1  -10.40    8.30
 -17   2   1    4.50    3.40
  17   2  -1    0.20    3.30
 -17  -2  -1   -5.20    9.80
  17  -2   1    3.70    3.50
 -17  -2   1   -3.60    7.40
  17  -2  -1   -5.90    4.00
  17  -2  -1    1.00    3.60
 -17   2  -1    6.10    3.50
 -17   2  -1    1.10   10.30
  17   2   1    2.20    4.00
 -17  -2  -2   17.60   12.10
 -17   2   2   30.10   13.10
  17  -2   2   16.80    4.50
  17  -2   2   17.60    5.20
  17   2  -2   10.50    4.30
  17   2   2   12.90    5.10
 -17   2  -2   25.50    5.30
 -17   2  -2   18.10   14.30
  17  -2  -2   17.40    5.20
 -17  -2   2    8.40   10.40
  17   2  -3   24.80    6.00
  17  -2   3   32.00    7.40
  17  -2   3   33.50    5.80
  17  -2  -3   21.80    5.70
  17   2   3   39.70    6.40
   0  -3   0    0.10    0.80
   0   3   0    2.70    0.80
   0   3   0    0.90    0.90
   0   3   0    0.90    0.90
   0  -3   0    0.20    0.80
   0   3   1  119.09    8.80
   0  -3  -1  128.19    8.80
   0   3  -1  133.69    8.80
   0  -3   1  132.19    8.80
   0   3  -1  141.49    8.60
   0   3  -1  137.29    8.70
   0  -3   1  136.69    8.90
   0   3   1  122.99    8.70
   0   3   1  132.59    8.90
   0  -3  -1  127.59    8.80
   0   3  -1  136.79    9.30
   0   3  -1  137.69    8.80
   0   3  -2  789.72   51.09
   0   3  -2  800.02   51.19
   0  -3  -2  817.12   51.19
   0   3   2  846.82   51.19
   0  -3  -2  813.02   51.19
   0   3  -2  783.92   52.09
   0  -3   2  804.22   51.09
   0  -3  -2  851.11   51.29
   0   3   2  858.31   51.39
   0   3  -3   28.90    4.40
   0  -3  -3   38.60    3.20
   0  -3  -3   33.20    3.10
   0   3  -3   28.90    3.00
   0  -3  -3   35.50    3.40
   0  -3   3   29.60    2.90
   0   3  -3   31.80    3.30
   0   3   3   31.50    3.00
   0   3   3   34.80    3.20
   0   3   4  177.18   12.50
   0   3  -4  171.68   12.10
   0  -3  -4  178.78   12.90
   0   3   4  165.08   12.10
   0  -3  -4  180.68   12.30
   0   3  -4  177.88   13.80
   0  -3   4  185.18   12.20
   0  -3  -4  178.28   12.30
   0   3  -4  185.98   12.30
   0  -3  -5   74.19    6.10
   0  -3  -5   74.99    6.10
   0   3   5   74.89    6.00
   0   3  -5   69.89    5.90
   0   3  -5   68.89    6.10
   0   3   5   67.49    6.10
   0   3  -5   68.79    7.40
   0  -3   5   76.09    5.90
   0  -3  -5   76.99    7.00
   0   3  -6    6.00    3.10
   0   3  -6    6.10    1.90
   0   3  -6    9.40    2.50
   0   3   6    3.60    1.80
   0  -3  -6    5.40    2.50
   0  -3  -6    6.70    2.30
   0   3   6    9.50    2.50
   0  -3  -6    3.10    1.60
   0  -3   6    5.10    1.80
   0   3  -7  149.39   10.90
   0  -3  -7  143.69   11.00
   0  -3  -7  136.19   12.20
   0  -3  -7  133.19   10.80
   0   3  -7  124.69   12.70
   0   3   7  135.39   10.60
   0   3   7  146.59   11.20
   0  -3   7  147.69   10.80
   0   3  -7  145.29   11.10
   0  -3  -8   96.59    6.50
   0  -3  -8   89.69    8.20
   0   3  -8   87.09    8.00
   0  -3  -8   86.09    8.30
   0  -3  -8   93.79    9.90
   0   3   8   95.79    8.20
   0  -3   8  104.49    8.40
   0   3  -8   85.09    8.40
   0   3  -8   89.39   10.60
   0  -3  -9  180.58   16.60
   0   3  -9  206.78   14.80
   0  -3  -9  199.98   14.80
   0   3  -9  200.88   14.90
   0   3   9  163.78   14.10
   0  -3   9  199.08   14.70
   0   3  -9  204.58   18.10
   0  -3  -9  174.68   14.60
   0   3  10    8.80    3.20
   0   3 -10    4.40    3.30
   0  -3 -10    6.70    3.90
   0   3 -10    6.70    2.90
   0  -3  10    6.40    3.00
   0  -3 -10    4.90    2.50
   0   3 -10    6.10    4.30
   0  -3 -10    7.40    3.50
   0   3 -11   34.80    5.70
   0   3 -11   37.90    9.00
   0  -3 -11   30.80    7.50
   0   3 -11   32.70    6.10
   0  -3 -11   31.00    5.50
   0  -3 -11   32.90    6.10
   0  -3  11   39.20    6.00
   0   3  11   26.30    5.20
   0   3 -12    6.50    5.10
   0  -3 -12    8.20    4.90
   0  -3 -12    7.40    3.50
   0   3 -12   10.60    3.90
   0  -3 -12    5.70    3.90
   0  -3  12   10.80    4.00
   0   3 -12   11.80    4.80
   0   3  12    7.10    3.50
   0  -3 -13    3.20    3.00
   0   3 -13    8.60    5.20
   0   3  13   -1.00    2.70
   0  -3 -13    6.70    4.40
   0   3 -13    3.30    3.90
   0  -3 -13    4.20    4.00
   0  -3  13    5.60    3.50
   0   3 -13    6.20    3.50
  -1   3   0 4807.92  312.27
   1   3   0 5093.79  313.47
  -1   3   0 4985.10  313.87
   1   3   0 5287.97  311.87
   1  -3   0 5108.69  312.67
  -1  -3   0 4946.21  312.27
   1   3   0 5007.10  311.97
  -1   3   0 5050.09  312.77
   1  -3   0 5057.89  312.87
  -1  -3   0 5187.28  312.47
  -1   3   0 4926.51  312.47
   1   3  -1   32.30    2.30
  -1  -3  -1   21.00    2.50
   1   3  -1   34.20    2.50
  -1  -3  -1   22.50    2.30
  -1   3   1   26.40    2.50
   1   3  -1   32.70    2.40
  -1  -3  -1   29.60    2.40
  -1   3   1   28.40    3.10
   1  -3   1   36.10    2.90
   1  -3   1   32.30    2.90
  -1   3   1   21.90    2.70
   1   3   1   23.60    2.30
  -1  -3   1   33.50    2.40
  -1   3  -1   35.30    2.90
  -1   3  -1   33.00    2.80
   1  -3  -1   25.60    2.90
   1   3   1   21.80    2.30
   1   3   1   33.70    2.60
   1  -3  -1   24.50    2.80
   1   3  -2  675.53   43.50
  -1   3   2  697.93   43.90
   1   3  -2  691.53   43.40
   1   3  -2  724.83   43.20
  -1   3   2  713.03   43.70
  -1   3   2  705.43   43.70
  -1  -3  -2  709.13   43.70
   1  -3   2  686.03   43.70
   1   3  -2  679.23   44.60
   1   3  -2  682.93   43.50
  -1  -3  -2  695.63   43.60
  -1  -3  -2  713.73   43.60
  -1   3  -2  655.93   43.70
  -1   3  -2  664.63   43.60
   1  -3  -2  703.63   43.70
   1   3   2  732.23   43.80
   1   3   2  700.53   43.50
   1   3   2  698.93   43.60
   1  -3  -2  693.23   43.80
  -1   3  -2  697.73   44.70
  -1  -3   2  674.83   43.40
  -1   3   3   32.10    3.10
   1   3  -3   30.90    2.70
   1   3  -3   38.00    3.00
  -1  -3  -3   31.30    3.00
   1  -3   3   31.10    3.10
  -1   3   3   32.10    3.30
   1   3  -3   37.80    2.30
   1   3  -3   37.50    3.10
  -1  -3  -3   31.10    3.40
   1   3  -3   39.60    4.30
   1  -3   3   29.60    2.40
  -1  -3  -3   29.00    3.00
  -1  -3   3   36.20    3.00
  -1   3  -3   35.80    3.40
  -1   3  -3   41.20    3.30
   1   3   3   32.20    3.00
   1  -3  -3   19.90    3.00
   1  -3  -3   27.60    3.10
  -1   3  -3   32.70    4.40
   1   3   3   30.40    3.00
   1   3   3   31.10    3.20
   1   3  -4  594.34   38.00
  -1  -3  -4  553.74   36.80
  -1   3   4  524.85   36.00
  -1   3   4  540.55   36.30
  -1  -3  -4  545.05   36.10
   1   3  -4  566.04   36.10
   1   3  -4  588.24   36.00
  -1  -3  -4  542.15   36.00
   1  -3   4  584.44   36.10
   1   3  -4  615.04   35.50
   1   3   4  545.25   36.20
  -1  -3   4  574.64   35.90
  -1   3  -4  593.34   38.00
   1   3   4  539.35   35.90
   1  -3  -4  554.34   36.20
  -1   3  -4  572.34   36.20
   1  -3  -4  565.14   37.00
  -1   3  -4  584.14   36.20
   1   3   4  565.44   35.90
   1  -3  -4  553.84   36.20
   1   3  -5   99.99   10.10
  -1   3   5  125.49    9.00
  -1   3   5  122.99    8.60
  -1  -3  -5  127.39    9.70
   1   3  -5  107.09    8.50
  -1  -3  -5  126.19    8.70
   1   3  -5  104.79    8.40
  -1  -3  -5  120.09    8.60
   1  -3   5   93.79    8.30
   1   3  -5  108.29    7.70
  -1   3  -5   99.19    8.50
   1  -3  -5  123.79    9.80
   1  -3  -5  133.89    9.00
  -1   3  -5   98.49   10.00
   1   3   5  122.39    8.80
  -1   3  -5  102.89    8.40
   1  -3  -5  131.89    8.80
   1   3   5  123.59    8.40
  -1  -3   5   98.19    8.20
   1   3   5  124.59    8.50
  -1  -3  -6   72.49    7.90
  -1  -3  -6   70.09    7.00
   1   3  -6   92.39    6.10
  -1  -3  -6   70.69    6.90
   1   3  -6   97.39    7.20
   1   3  -6  100.49    7.40
  -1   3   6   75.69    7.20
   1  -3   6  107.49    7.40
   1   3  -6   99.49    9.50
  -1   3   6   71.09    6.90
  -1   3  -6  107.69    7.60
  -1   3  -6  104.49    9.70
  -1  -3   6   96.99    7.10
   1   3   6   76.09    6.90
   1  -3  -6   73.59    6.90
   1  -3  -6   79.79    8.20
  -1   3  -6  100.59    7.40
   1   3   6   75.99    6.50
   1   3   6   79.99    7.30
   1  -3  -6   75.79    7.10
  -1   3   7   25.00    4.10
   1   3  -7   25.40    4.10
   1  -3   7   19.60    3.50
  -1  -3  -7   23.70    4.00
  -1  -3  -7   17.90    4.40
   1   3  -7   27.60    6.20
  -1  -3  -7   21.70    3.50
   1   3  -7   22.60    2.50
  -1   3   7   17.70    3.40
   1   3  -7   28.20    3.90
   1  -3  -7   24.80    4.10
  -1   3  -7   13.50    3.30
   1  -3  -7   25.10    2.70
  -1  -3   7   23.50    3.80
   1   3   7   20.10    3.00
  -1   3  -7   19.80    3.40
  -1   3  -7   24.30    6.00
   1  -3  -7   26.40    5.30
   1   3   7   20.50    3.40
   1  -3  -7   25.20    3.70
  -1  -3  -8  293.67   19.70
   1   3  -8  284.37   19.30
   1   3  -8  279.97   22.50
  -1   3   8  279.67   19.80
   1   3  -8  277.47   19.40
  -1  -3  -8  255.07   19.10
  -1   3   8  261.87   19.00
   1  -3   8  258.37   19.10
  -1  -3  -8  271.27   21.10
   1  -3  -8  272.17   17.70
  -1   3  -8  271.47   19.30
   1   3   8  257.17   19.00
   1  -3  -8  266.87   21.30
  -1   3  -8  258.57   21.90
   1  -3  -8  292.77   19.50
  -1  -3   8  274.87   19.10
   1   3   8  269.87   18.50
  -1   3  -8  252.07   19.20
   1  -3  -8  284.87   19.60
   1   3  -9  277.17   23.70
   1  -3   9  282.77   20.30
   1   3  -9  276.27   20.20
  -1  -3  -9  291.57   20.60
   1   3  -9  272.97   20.40
  -1  -3  -9  293.87   22.80
  -1   3   9  276.87   20.10
  -1  -3  -9  291.17   20.50
   1  -3  -9  287.07   22.80
  -1   3  -9  306.27   20.70
  -1   3  -9  271.17   23.40
  -1   3  -9  286.87   20.40
   1  -3  -9  300.37   20.70
   1  -3  -9  276.77   20.40
   1   3   9  273.87   19.20
  -1  -3   9  261.27   19.90
   1   3   9  274.27   20.00
   1   3 -10    8.40    3.10
   1  -3  10    4.30    2.60
  -1  -3 -10    3.30    3.10
  -1  -3 -10    7.00    3.00
   1   3 -10    6.00    4.50
  -1   3  10    1.70    2.70
   1   3 -10    3.10    3.30
  -1  -3 -10    5.40    3.20
   1  -3 -10    6.60    3.20
   1  -3 -10    5.50    3.80
  -1   3 -10    0.20    2.10
   1   3  10    3.30    2.40
  -1   3 -10    6.10    3.40
   1  -3 -10    4.10    2.90
  -1  -3  10    3.60    2.90
  -1   3 -10    3.20    3.30
   1   3 -11    7.50    3.40
  -1   3  11    5.40    3.20
  -1  -3 -11   -1.30    2.90
  -1  -3 -11    4.60    2.70
   1  -3  11    4.50    2.90
  -1  -3 -11    6.20    4.20
   1   3 -11    2.00    3.30
   1   3 -11    1.60    3.60
   1   3  11    6.20    3.20
  -1   3 -11    4.50    3.30
  -1  -3  11    4.20    2.90
   1  -3 -11    1.90    3.10
   1  -3 -11    1.70    2.70
  -1   3 -11    5.20    4.30
   1  -3 -11    3.60    3.50
  -1   3 -11    7.80    3.30
   1  -3  12    8.50    3.80
   1   3 -12    4.80    3.70
  -1  -3 -12    8.10    4.00
  -1   3  12    2.40    3.30
   1   3 -12    3.90    3.00
  -1  -3 -12    1.60    3.60
  -1  -3 -12    0.40    2.60
   1   3 -12    4.90    4.60
  -1   3 -12    7.60    3.90
   1  -3 -12    3.20    2.80
   1  -3 -12    2.50    3.80
  -1   3 -12    4.00    3.10
  -1  -3  12    8.70    3.50
  -1   3 -12    2.70    4.40
   1   3  12    5.60    3.10
   1  -3 -12    4.50    3.20
  -1  -3 -13   11.60    4.20
   1   3 -13   15.10    4.60
  -1  -3 -13   15.00    5.30
   1   3 -13   12.40    6.40
   1  -3  13   10.10    4.20
   1   3 -13    5.70    4.00
  -1   3  13   11.40    4.40
  -1  -3 -13    9.40    4.60
  -1  -3  13   10.60    4.00
   1  -3 -13    9.70    5.40
   1  -3 -13    9.50    4.70
  -1   3 -13   17.00    4.60
   1  -3 -13    7.70    3.70
  -1   3 -13    5.00    4.60
   1   3  13   11.30    4.40
  -1   3 -13   23.10    7.80
  -2  -3   0   57.69    4.10
  -2   3   0   64.79    5.00
   2   3   0   61.99    4.10
   2  -3   0   68.59    5.10
  -2   3   0   62.29    5.20
   2  -3   0   66.79    5.00
  -2   3   0   58.99    5.50
   2   3  -1 1821.12  117.39
  -2   3   1 1877.21  117.99
   2   3  -1 1900.91  117.89
   2   3  -1 1803.12  117.59
  -2   3   1 1907.81  117.99
   2  -3   1 1871.61  118.09
  -2  -3  -1 1881.41  117.79
  -2   3   1 1977.20  118.19
   2   3  -1 1919.11  117.79
  -2   3   1 1886.61  118.39
   2  -3   1 1844.82  117.99
  -2  -3  -1 1970.10  117.49
  -2  -3  -1 1921.91  118.19
  -2   3  -1 1872.21  118.09
   2  -3  -1 1926.01  117.99
   2   3   1 1948.61  117.59
   2   3   1 1930.41  117.99
   2   3   1 1948.61  117.49
   2  -3  -1 1921.41  118.09
  -2  -3   1 1880.21  117.39
  -2   3  -1 1889.91  118.99
  -2  -3  -2  521.85   34.50
  -2   3   2  556.34   34.80
  -2   3   2  551.24   35.10
  -2  -3  -2  540.05   34.50
  -2  -3  -2  546.55   35.30
   2   3  -2  542.35   34.40
  -2   3   2  553.04   34.80
   2   3  -2  576.94   34.60
   2  -3   2  549.95   34.40
   2   3  -2  559.84   34.40
   2  -3   2  556.64   34.80
   2   3  -2  561.24   35.90
   2  -3  -2  526.85   34.90
  -2  -3   2  565.34   34.30
  -2   3  -2  551.84   34.90
  -2  -3   2  559.04   34.40
  -2   3  -2  566.24   36.10
  -2   3  -2  536.95   34.80
   2  -3  -2  558.04   34.90
   2   3   2  528.05   34.40
   2   3   2  522.45   34.50
   2   3   2  549.74   34.80
   2  -3   3   41.60    3.80
  -2  -3  -3   34.40    3.30
  -2   3   3   35.00    3.40
   2   3  -3   37.50    3.20
  -2  -3  -3   37.40    3.30
   2  -3   3   39.20    2.90
  -2   3   3   29.70    3.50
   2   3  -3   44.40    4.80
  -2   3   3   34.20    3.50
  -2  -3  -3   35.20    4.30
   2   3  -3   36.90    3.10
   2   3  -3   42.80    3.40
   2  -3  -3   33.40    3.50
   2  -3  -3   35.00    3.50
   2   3   3   35.70    3.40
  -2   3  -3   43.40    3.70
  -2  -3   3   39.60    3.20
  -2   3  -3   44.00    4.00
  -2   3  -3   36.70    4.90
   2   3   3   35.20    3.20
   2   3   3   38.80    3.40
   2  -3   4  192.88   13.40
  -2   3   4  212.28   13.80
   2   3  -4  188.78   15.00
  -2  -3  -4  197.28   13.30
  -2   3   4  200.68   13.20
  -2   3   4  211.28   13.50
  -2  -3  -4  195.38   14.10
  -2  -3  -4  194.48   13.30
   2   3  -4  188.68   13.10
   2   3  -4  191.88   13.20
   2   3  -4  195.78   12.90
  -2   3  -4  187.78   15.00
   2  -3  -4  205.48   13.60
  -2   3  -4  178.98   13.30
   2   3   4  200.98   13.20
  -2  -3   4  191.88   13.10
   2   3   4  181.78   13.10
   2   3   4  191.28   13.40
   2  -3  -4  210.28   13.60
  -2   3  -4  196.88   13.60
   2   3  -5  206.78   14.00
   2   3  -5  222.48   14.60
   2  -3   5  221.08   14.70
   2   3  -5  215.88   16.80
  -2  -3  -5  205.38   14.70
  -2  -3  -5  206.68   15.70
  -2   3   5  202.58   15.00
  -2   3   5  215.38   14.70
  -2  -3  -5  222.58   14.70
   2   3  -5  215.48   14.60
   2  -3  -5  207.18   14.90
   2  -3  -5  210.18   14.80
  -2   3  -5  212.28   14.90
   2   3   5  206.18   14.40
  -2  -3   5  218.88   14.50
   2   3   5  202.88   14.50
  -2   3  -5  220.68   14.80
  -2   3  -5  221.38   16.90
   2   3  -6   92.49    9.10
  -2   3   6   83.49    7.00
   2   3  -6   83.89    6.00
  -2   3   6   79.49    7.30
   2   3  -6   88.69    6.90
  -2  -3  -6   77.59    7.90
   2   3  -6   93.19    7.10
  -2  -3  -6   78.89    6.80
  -2  -3  -6   78.59    6.90
   2  -3   6   88.19    7.10
   2   3   6   84.99    6.50
  -2   3  -6   80.29    7.10
   2  -3  -6   83.09    7.10
  -2   3  -6   89.79    7.10
   2   3   6   67.29    6.60
   2  -3  -6   78.89    7.00
   2  -3  -6   71.49    8.00
  -2  -3   6   73.29    6.50
  -2   3  -6   85.79    8.90
   2   3  -7   35.30    4.70
  -2  -3  -7   20.30    3.70
  -2  -3  -7   27.90    4.20
   2   3  -7   23.90    5.80
  -2   3   7   29.20    4.60
   2   3  -7   26.90    3.80
  -2  -3  -7   27.00    5.40
   2  -3   7   31.00    4.30
  -2   3   7   26.30    4.20
   2   3  -7   30.10    3.20
  -2   3  -7   21.00    4.00
   2   3   7   27.50    4.10
   2  -3  -7   27.80    4.30
  -2   3  -7   28.30    4.30
   2  -3  -7   29.10    4.40
   2  -3  -7   21.80    5.10
   2  -3  -7   27.50    3.10
  -2   3  -7   35.50    7.20
  -2  -3   7   27.30    4.00
   2   3   7   25.20    3.40
   2   3  -8   65.69    7.00
   2  -3   8   69.39    6.80
   2   3  -8   69.29    6.70
   2   3  -8   63.69   10.40
  -2  -3  -8   76.69    8.60
  -2  -3  -8   69.19    7.00
  -2  -3  -8   80.19    7.10
  -2   3   8   65.99    7.20
  -2   3   8   82.39    7.20
   2   3  -8   66.69    5.50
   2  -3  -8   71.09    5.60
  -2   3  -8   64.99    6.80
  -2  -3   8   64.99    6.70
   2   3   8   71.89    6.10
  -2   3  -8   65.49    7.10
   2  -3  -8   74.99    7.10
   2  -3  -8   82.49    7.30
   2  -3  -8   71.79    8.70
   2   3   8   80.49    7.00
  -2   3  -8   70.09    9.30
  -2  -3  -9    9.10    3.00
   2   3  -9    5.00    3.00
  -2  -3  -9    6.20    2.80
   2   3  -9    6.20    2.40
  -2   3   9    7.70    3.30
  -2   3   9    9.90    3.10
  -2  -3  -9    5.20    3.50
   2   3  -9    3.80    3.40
   2  -3   9    8.00    2.80
  -2   3  -9    7.40    3.30
   2  -3  -9    6.70    3.80
   2  -3  -9    6.40    2.80
   2   3   9    3.20    2.00
   2  -3  -9    8.20    3.30
   2   3   9    3.40    2.50
  -2   3  -9    4.30    3.90
  -2  -3   9    8.80    3.00
  -2   3  -9    6.30    2.70
   2   3 -10   10.20    3.10
   2   3 -10   10.10    4.70
  -2   3  10   14.40    3.70
  -2  -3 -10   10.40    3.90
   2  -3  10   10.70    3.40
   2   3 -10    7.90    3.20
  -2  -3 -10    9.90    4.20
  -2  -3 -10    8.40    3.00
  -2   3 -10   12.00    3.80
  -2   3 -10    9.60    4.40
   2  -3 -10   13.10    4.00
  -2  -3  10   11.30    3.30
  -2   3 -10    7.40    3.20
   2  -3 -10    7.40    4.10
   2   3  10    8.30    3.30
   2  -3 -10   14.50    3.60
   2  -3  11   23.40    5.10
   2   3 -11   25.80    5.20
  -2  -3 -11   28.90    5.60
   2   3 -11   27.90    8.20
  -2   3  11   36.80    5.90
   2   3 -11   31.10    6.10
  -2  -3 -11   33.10    7.50
  -2  -3 -11   37.10    6.50
  -2  -3  11   21.90    4.70
  -2   3 -11   29.60    5.90
   2  -3 -11   37.20    6.20
   2  -3 -11   39.90    6.80
  -2   3 -11   38.40    9.20
   2   3  11   27.70    5.10
  -2   3 -11   30.20    5.40
   2   3 -12   22.60    5.10
  -2  -3 -12   19.50    5.00
  -2  -3 -12   21.00    5.10
   2   3 -12   18.90    7.10
  -2   3  12   28.30    5.50
  -2  -3 -12   28.10    7.70
   2   3 -12   14.70    5.30
   2  -3  12   16.70    4.70
   2   3  12   28.40    5.30
  -2  -3  12   23.40    5.10
   2  -3 -12   25.30    5.90
  -2   3 -12   17.70    7.30
  -2   3 -12   19.60    4.70
   2  -3 -12   27.90    5.50
  -2   3 -12   21.30    5.30
   2  -3  13    6.60    4.10
   2   3 -13    6.00    4.40
   2   3 -13    9.40    6.50
  -2  -3 -13   11.90    5.20
   2   3 -13   17.10    4.60
  -2  -3 -13    6.30    3.70
  -2   3  13    6.40    3.90
  -2  -3 -13   11.80    4.70
   2  -3 -13   10.00    4.70
  -2   3 -13   11.50    5.50
  -2   3 -13    7.80    3.70
   2   3  13    9.50    4.00
   2  -3 -13    4.60    3.40
  -2  -3  13   13.90    4.40
  -2   3 -13   12.90    5.40
   3   3   0  588.54   36.00
   3   3   0  589.24   35.80
  -3   3   0  553.84   37.00
   3  -3   0  570.74   36.20
  -3   3   0  578.14   36.30
  -3   3   0  545.15   36.00
   3  -3   0  551.24   36.00
   3   3  -1 1370.46   84.49
   3   3  -1 1178.28   83.89
  -3   3   1 1361.76   84.69
  -3  -3  -1 1384.26   84.09
  -3  -3  -1 1414.86   84.09
   3  -3   1 1358.46   84.49
   3  -3   1 1394.76   84.79
   3   3  -1 1366.46   83.89
   3  -3   1 1343.27   84.89
  -3  -3  -1 1349.77   85.29
  -3   3   1 1377.26   84.99
  -3   3   1 1359.06   85.49
   3   3   1 1362.26   84.79
  -3   3  -1 1373.76   86.19
   3  -3  -1 1369.06   84.69
  -3   3  -1 1359.66   84.89
  -3   3  -1 1352.16   84.69
   3   3   1 1344.77   84.39
   3   3   1 1259.47   83.99
   3   3   1 1405.76   83.99
  -3  -3   1 1407.16   83.99
   3  -3  -1 1388.56   84.79
  -3  -3  -2   28.90    4.50
  -3  -3  -2   23.30    2.30
  -3   3   2   23.50    3.30
   3   3  -2   30.80    2.60
   3   3  -2   26.60    2.20
   3  -3   2   26.80    2.50
   3  -3   2   19.60    2.80
  -3   3   2   22.70    3.00
   3   3  -2   28.70    2.20
  -3  -3  -2   23.70    2.30
  -3   3   2   20.30    2.80
  -3   3  -2   21.30    3.10
  -3  -3   2   30.00    2.20
   3  -3  -2   22.70    3.00
   3   3   2   24.70    2.90
  -3   3  -2   26.30    3.00
   3  -3  -2   26.80    3.20
  -3   3  -2   25.90    5.10
   3   3   2   27.00    2.40
   3   3   2   24.20    2.30
  -3   3   3   92.79    6.90
  -3  -3  -3   98.49    6.50
  -3  -3  -3   92.19    8.10
   3   3  -3   84.79    6.30
   3  -3   3   87.99    6.90
   3   3  -3   83.29    6.30
  -3   3   3   93.29    7.20
  -3  -3  -3   89.69    6.50
  -3   3   3   91.79    6.70
   3   3  -3   84.89    6.40
   3  -3   3   86.89    6.20
  -3   3  -3   88.19    7.00
   3  -3  -3   92.69    7.00
  -3   3  -3   89.89    6.80
  -3   3  -3   82.69    8.40
   3   3   3   97.29    6.80
  -3  -3   3   79.89    6.20
   3  -3  -3   90.19    6.80
   3   3   3   95.99    6.40
  -3   3   4  219.68   14.50
  -3  -3  -4  210.58   14.30
  -3   3   4  223.08   14.90
   3   3  -4  201.58   14.10
  -3   3   4  211.58   14.30
   3  -3   4  199.18   14.40
  -3  -3  -4  220.48   15.60
  -3  -3  -4  220.38   14.30
   3   3  -4  208.88   14.20
   3   3  -4  220.08   14.10
  -3  -3   4  211.88   14.10
   3   3   4  205.38   14.30
   3   3   4  213.58   14.20
  -3   3  -4  205.08   14.50
  -3   3  -4  210.88   14.70
   3  -3  -4  215.98   14.60
  -3   3  -4  192.88   16.20
   3  -3  -4  217.98   14.70
   3   3  -5  207.88   13.70
  -3  -3  -5  196.08   15.40
  -3   3   5  216.78   14.80
   3   3  -5  189.68   16.20
  -3  -3  -5  215.48   14.30
  -3   3   5  206.48   14.30
   3   3  -5  198.08   14.00
  -3  -3  -5  205.88   14.10
  -3   3   5  203.48   13.90
   3  -3   5  203.68   14.30
   3   3  -5  198.38   14.00
   3  -3  -5  222.38   14.50
  -3   3  -5  207.18   14.40
   3   3   5  211.18   14.10
  -3   3  -5  192.28   14.40
   3   3   5  199.78   14.00
   3  -3  -5  220.48   14.50
  -3   3  -5  193.38   16.20
  -3  -3   5  196.48   13.90
   3   3  -6   41.70    7.30
   3   3  -6   35.90    4.60
  -3   3   6   31.80    4.40
   3  -3   6   38.90    4.80
  -3  -3  -6   47.70    4.60
   3   3  -6   41.10    4.20
   3   3  -6   42.70    3.70
  -3  -3  -6   43.60    4.40
  -3   3   6   45.20    4.80
  -3  -3  -6   40.70    6.20
  -3  -3   6   41.80    4.20
  -3   3  -6   40.00    5.10
   3  -3  -6   47.80    4.80
   3  -3  -6   37.60    3.80
  -3   3  -6   33.20    6.50
   3   3   6   37.50    4.00
  -3   3  -6   37.70    4.80
   3  -3  -6   33.30    4.40
   3   3   6   45.20    4.40
   3   3  -7   11.90    4.20
  -3  -3  -7    5.70    3.00
   3   3  -7   17.10    3.20
  -3  -3  -7    8.70    2.60
   3   3  -7   15.30    3.00
   3  -3   7   12.30    2.80
  -3   3   7   15.50    3.60
   3   3  -7   17.70    2.50
  -3  -3  -7    9.70    2.80
  -3   3   7   13.10    3.20
  -3  -3   7   16.60    3.10
  -3   3  -7   10.60    3.00
   3  -3  -7   10.50    2.90
  -3   3  -7   12.70    4.80
   3  -3  -7   10.20    2.20
   3   3   7   11.70    2.40
  -3   3  -7   12.50    2.80
   3  -3  -7   12.70    3.20
   3   3   7    7.00    2.40
  -3  -3  -8   13.60    3.00
  -3   3   8   12.80    3.30
  -3  -3  -8   12.60    3.50
   3   3  -8    9.90    3.20
   3   3  -8   16.90    2.60
   3   3  -8   11.70    3.10
   3  -3   8   11.60    3.50
  -3  -3  -8   12.90    4.20
   3   3  -8   16.10    5.20
  -3   3   8   16.90    3.80
  -3   3  -8   14.70    3.90
   3  -3  -8   14.30    3.50
  -3  -3   8   12.60    3.10
   3   3   8   15.50    3.30
   3  -3  -8   12.40    2.40
   3  -3  -8   12.30    3.30
   3   3   8   15.40    2.80
  -3   3  -8   14.70    3.40
  -3   3  -8   12.20    4.60
  -3  -3  -9    5.80    3.50
   3   3  -9    7.30    2.80
  -3   3   9    5.10    3.00
  -3   3   9    2.80    2.80
  -3  -3  -9    3.30    2.50
   3   3  -9    6.70    4.40
   3  -3   9    5.40    2.70
   3   3  -9   11.40    3.60
  -3  -3  -9    4.80    2.40
   3   3   9    3.50    2.30
   3   3   9    4.70    2.20
   3  -3  -9    6.40    3.10
   3  -3  -9    1.00    2.20
  -3  -3   9    2.90    2.40
   3  -3  -9    7.60    2.00
  -3   3  -9    4.80    3.30
  -3   3  -9    9.50    4.70
  -3   3  -9    6.10    2.60
  -3  -3 -10   54.99    9.40
  -3  -3 -10   44.90    6.70
  -3   3  10   54.29    7.00
   3   3 -10   40.60    6.20
  -3  -3 -10   57.29    7.40
  -3   3  10   38.40    6.60
   3   3 -10   57.09    7.50
   3   3 -10   44.50    9.50
   3  -3  10   39.30    6.20
  -3   3 -10   42.70    8.90
   3  -3 -10   55.29    7.50
  -3   3 -10   58.69    7.80
   3   3  10   42.10    6.10
  -3  -3  10   43.20    6.00
  -3   3 -10   48.20    6.60
   3  -3 -10   49.80    6.90
   3   3 -11   15.30    4.10
  -3  -3 -11   30.70    7.50
   3   3 -11   35.10    9.40
  -3  -3 -11   22.40    5.40
  -3   3  11   26.20    5.30
   3  -3  11   15.10    4.30
   3   3 -11   21.90    5.30
  -3  -3 -11   21.40    4.90
  -3   3 -11   27.90    5.90
   3  -3 -11   24.80    5.10
   3  -3 -11   35.60    6.20
   3   3  11   25.70    5.00
  -3   3 -11   26.40    7.60
  -3  -3  11   35.40    5.50
  -3   3 -11   25.70    5.20
  -3  -3 -12   30.00    6.40
   3   3 -12   42.90    7.40
  -3  -3 -12   43.90    7.40
  -3  -3 -12   43.70    9.00
   3   3 -12   41.30    6.60
   3   3 -12   46.80   11.30
  -3   3  12   44.50    6.80
   3  -3  12   38.00    6.60
  -3   3 -12   50.29   10.90
  -3   3 -12   46.40    7.70
   3  -3 -12   36.10    7.00
   3  -3 -12   45.90    7.40
  -3  -3  12   41.30    6.50
  -3   3 -12   35.90    6.30
   3   3  12   28.10    5.70
  -3  -3 -13    3.70    3.80
   3   3 -13    8.50    4.00
   3   3 -13   12.30    4.80
  -3  -3 -13    8.20    3.60
  -3  -3 -13   11.50    4.90
  -3   3  13   10.10    4.50
   3  -3  13    5.50    4.10
  -3   3 -13   13.60    4.30
   3   3  13   12.10    3.90
  -3   3 -13    9.10    5.00
   3  -3 -13   15.90    4.70
  -3   3 -13   19.20    7.40
   3  -3 -13   12.50    4.50
   4   3   0    5.40    1.40
  -4  -3   0    5.90    2.60
  -4   3   0   10.20    3.60
   4  -3   0    3.80    2.20
  -4   3   0    6.80    2.40
  -4   3   0    6.50    2.20
   4  -3   0    7.60    1.60
   4  -3   0    1.90    1.80
   4   3  -1  376.06   24.50
  -4   3   1  411.06   24.90
  -4   3   1  398.96   26.00
  -4   3   1  417.06   25.20
   4  -3   1  318.17   24.60
   4  -3   1  340.87   24.90
   4   3  -1  355.96   23.80
  -4  -3  -1  439.56   24.10
   4  -3   1  369.56   24.50
  -4  -3  -1  408.66   24.00
  -4  -3  -1  403.26   25.90
   4   3  -1  352.96   23.70
   4  -3  -1  387.76   24.80
   4   3   1  390.46   24.80
  -4   3  -1  339.07   26.40
   4   3   1  419.36   23.90
   4   3   1  404.06   24.40
   4  -3  -1  401.66   24.90
  -4   3  -1  357.26   25.00
   4  -3  -1  398.36   24.60
  -4  -3   1  343.17   23.80
  -4  -3  -2   28.90    5.30
  -4  -3  -2   36.10    3.00
   4   3  -2   42.70    3.50
   4  -3   2   46.80    4.10
  -4  -3  -2   35.50    3.10
  -4   3   2   27.80    3.90
   4  -3   2   39.10    4.30
   4  -3   2   44.10    3.50
   4   3  -2   42.50    3.00
  -4   3   2   35.80    3.70
  -4  -3   2   44.20    2.90
   4   3   2   35.70    3.00
  -4   3  -2   55.49    6.90
  -4   3  -2   39.30    4.00
  -4   3  -2   49.90    4.00
   4   3   2   40.30    3.60
   4  -3  -2   24.10    3.50
   4   3   2   37.60    3.20
   4  -3  -2   24.70    3.50
  -4  -3  -3  415.56   26.30
   4   3  -3  392.86   26.10
   4   3  -3  405.26   26.40
   4   3  -3  375.06   26.10
  -4   3   3  419.26   26.70
  -4  -3  -3  424.66   28.30
  -4   3   3  444.76   27.20
   4  -3   3  395.46   26.70
  -4   3   3  435.36   26.70
  -4  -3  -3  414.36   26.30
   4  -3   3  401.26   26.20
   4  -3  -3  421.06   26.80
  -4   3  -3  409.86   26.90
  -4   3  -3  403.86   29.00
  -4  -3   3  398.06   26.00
   4   3   3  413.06   26.10
   4   3   3  406.76   26.20
   4   3   3  413.86   26.70
   4  -3  -3  452.55   26.90
  -4   3  -3  389.86   26.60
   4   3  -4  177.18   11.50
  -4  -3  -4  169.18   13.60
   4   3  -4  167.78   11.40
  -4   3   4  162.88   11.90
  -4  -3  -4  161.98   11.60
  -4   3   4  167.58   11.60
  -4  -3  -4  166.28   11.50
   4   3  -4  163.48   11.40
   4  -3   4  163.38   11.90
  -4   3   4  167.18   12.20
  -4  -3   4  172.88   11.30
   4  -3  -4  177.08   12.00
   4   3   4  177.38   11.80
  -4   3  -4  173.88   11.90
  -4   3  -4  148.39   13.80
   4  -3  -4  166.58   12.00
   4   3   4  150.78   11.30
  -4   3  -4  171.18   12.10
   4   3  -5  102.39    7.90
   4   3  -5  109.19    8.10
  -4   3   5  114.39    8.80
  -4  -3  -5  100.19    8.10
  -4   3   5  101.59    7.90
  -4  -3  -5  101.49    8.00
   4  -3   5  105.99    8.40
   4   3  -5  114.99    7.90
  -4   3   5  108.69    8.40
  -4  -3  -5   89.69    9.70
  -4   3  -5  102.19    8.30
  -4  -3   5  111.09    7.90
  -4   3  -5  111.59    8.80
   4  -3  -5  102.39    8.30
   4   3   5  108.09    8.10
   4  -3  -5  104.39    8.50
   4  -3  -5  102.29    7.90
  -4   3  -5  114.79   10.80
   4   3   5  105.29    8.00
  -4  -3  -6   11.20    3.90
   4   3  -6    9.90    2.30
  -4   3   6   16.40    3.20
  -4  -3  -6   17.20    3.10
  -4   3   6   10.10    2.30
   4   3  -6   13.90    2.40
   4   3  -6   15.90    2.80
   4  -3   6   14.60    3.10
  -4   3   6    8.80    2.80
   4  -3   6   13.00    1.30
  -4  -3  -6   10.70    2.50
   4   3   6   12.70    2.50
   4  -3  -6   10.50    2.80
   4  -3  -6   12.80    2.40
  -4   3  -6   15.00    4.70
   4   3   6   12.90    2.60
  -4   3  -6   15.60    3.60
   4  -3  -6   14.50    3.00
  -4   3  -6   14.90    2.90
  -4  -3   6   16.30    2.80
   4   3  -7   21.70    3.60
  -4  -3  -7   26.70    4.10
  -4   3   7   30.40    4.60
   4  -3   7   24.00    3.90
   4   3  -7   24.80    3.30
  -4  -3  -7   24.80    5.40
   4   3  -7   28.10    4.10
  -4   3   7   26.40    4.60
  -4  -3  -7   18.60    3.50
   4  -3  -7   21.60    3.90
   4   3   7   24.00    3.50
   4  -3  -7   21.10    3.80
  -4   3  -7   21.30    4.40
   4   3   7   26.30    3.90
   4  -3  -7   26.80    3.40
  -4  -3   7   23.40    3.60
  -4   3  -7   24.90    6.20
  -4   3  -7   24.00    4.00
  -4  -3  -8    8.60    2.70
   4   3  -8    6.40    2.80
  -4   3   8    4.80    2.60
  -4  -3  -8   11.30    4.20
   4   3  -8    5.40    2.40
   4  -3   8    8.50    3.10
   4   3  -8    9.60    2.30
  -4  -3  -8    8.90    2.90
  -4   3   8    3.70    2.80
   4  -3  -8    6.70    2.80
   4  -3  -8    8.30    2.20
  -4   3  -8   13.00    3.90
   4   3   8   10.20    2.50
  -4  -3   8    9.40    2.80
  -4   3  -8   15.60    3.50
  -4   3  -8   10.60    5.00
   4   3   8   10.00    2.80
   4  -3  -8    9.60    3.00
   4   3  -9   34.80    5.20
   4   3  -9   26.80    3.50
   4   3  -9   27.50    4.60
  -4  -3  -9   23.50    4.30
  -4   3   9   15.70    4.20
  -4  -3  -9   18.80    4.40
  -4   3   9   23.30    4.50
  -4  -3  -9   13.80    4.80
   4  -3   9   31.40    4.90
   4  -3  -9   20.70    3.30
   4  -3  -9   17.90    4.00
  -4   3  -9   29.40    7.30
   4   3   9   18.50    4.00
   4  -3  -9   22.60    4.40
  -4   3  -9   28.50    5.30
  -4   3  -9   28.20    4.80
  -4  -3   9   23.50    4.10
  -4  -3 -10   26.70    6.80
  -4  -3 -10   20.00    4.70
  -4  -3 -10   21.80    4.60
   4   3 -10   24.50    4.60
  -4   3  10   21.90    4.60
   4   3 -10   27.00    5.20
  -4   3  10   21.30    5.20
   4  -3  10   23.80    4.70
   4   3  10   23.90    4.60
  -4   3 -10   22.20    4.70
  -4   3 -10   30.90    5.90
   4  -3 -10   20.00    4.60
   4  -3 -10   23.70    5.10
  -4  -3  10   25.40    4.60
  -4   3 -10   30.30    7.90
   4   3 -11   15.30    4.00
   4  -3  11    9.40    3.70
  -4  -3 -11   12.60    4.10
  -4  -3 -11   15.10    5.50
   4   3 -11   12.90    4.20
  -4   3  11    9.60    4.10
  -4  -3 -11   13.70    4.40
  -4  -3  11   11.40    3.50
   4   3  11    5.40    3.20
  -4   3 -11   18.40    6.50
   4  -3 -11   10.80    4.10
  -4   3 -11    8.50    4.00
   4  -3 -11    6.80    3.40
  -4   3 -11   17.50    4.50
   4  -3  12   10.80    4.40
  -4  -3 -12   10.50    4.40
  -4  -3 -12    4.70    2.90
   4   3 -12   15.30    4.50
  -4   3  12   12.20    4.50
  -4  -3 -12   12.70    4.70
   4  -3 -12    8.00    4.00
   4  -3 -12    5.90    3.50
  -4   3 -12    9.90    4.30
   4   3  12    9.60    3.90
  -4   3 -12   12.10    4.20
  -4   3 -12    9.30    5.30
   4  -3  13   11.30    4.50
  -4  -3 -13   30.10    7.70
  -4   3  13   18.40    5.40
  -4  -3 -13   11.80    5.30
  -4  -3 -13   23.40    5.60
   4   3 -13   17.60    5.10
   4  -3 -13   21.90    5.70
  -4   3 -13   26.00    8.40
   4  -3 -13   20.60    6.30
   4   3  13   14.00    4.60
  -4   3 -13   11.70    5.70
  -4   3 -13   20.80    5.60
  -5  -3   0  217.68   16.60
  -5   3   0  222.08   15.30
  -5   3   0  222.78   17.10
   5   3   0  236.18   14.90
   5  -3   0  220.88   15.20
   5  -3   0  233.78   15.10
  -5   3   0  216.18   15.50
  -5   3   1  276.37   17.40
  -5  -3  -1  249.68   16.40
   5  -3   1  263.97   17.10
   5   3  -1  239.98   16.10
  -5   3   1  268.57   17.60
   5  -3   1  252.17   17.50
   5   3  -1  264.17   16.10
  -5   3   1  261.17   18.90
   5   3  -1  263.77   17.00
  -5  -3  -1  262.97   18.80
   5  -3   1  248.28   17.30
   5  -3  -1  264.67   17.30
  -5  -3   1  232.78   16.20
   5  -3  -1  268.57   17.10
  -5  -3   1  254.77   16.10
  -5   3  -1  241.58   19.40
  -5   3  -1  238.58   17.20
   5   3   1  274.77   16.90
  -5   3  -1  239.68   17.50
   5  -3  -1  275.57   17.40
   5   3   1  277.87   16.30
  -5  -3  -2   53.09    4.00
   5   3  -2   52.69    3.90
  -5  -3  -2   54.89    4.10
   5  -3   2   51.79    4.50
   5   3  -2   50.09    4.50
   5  -3   2   49.90    4.80
  -5   3   2   50.89    5.00
  -5   3   2   52.09    6.40
  -5   3   2   51.59    5.10
   5  -3   2   49.90    5.00
  -5  -3  -2   56.19    6.70
  -5   3  -2   48.30    4.60
  -5  -3   2   53.69    3.90
  -5   3  -2   48.00    5.00
   5  -3  -2   58.09    5.00
  -5   3  -2   54.49    7.90
  -5  -3   2   58.79    4.00
   5   3   2   53.79    4.00
   5   3   2   54.69    4.30
   5  -3  -2   56.89    4.90
   5  -3  -2   50.69    4.50
   5  -3   3  168.18   12.70
  -5   3   3  208.28   13.30
   5   3  -3  164.88   12.30
  -5  -3  -3  188.18   12.60
   5   3  -3  179.98   12.80
  -5   3   3  215.08   13.70
   5   3  -3  177.28   12.40
  -5  -3  -3  205.08   15.50
  -5   3   3  194.38   13.10
  -5  -3  -3  195.08   12.60
   5  -3   3  167.88   13.00
   5  -3  -3  196.18   13.00
   5   3   3  197.48   12.50
  -5   3  -3  164.58   12.90
   5  -3  -3  213.28   13.40
  -5   3  -3  188.28   13.40
   5   3   3  188.88   12.50
   5  -3  -3  210.38   13.30
   5   3   3  191.78   13.10
  -5  -3   3  184.08   12.30
  -5   3  -3  168.28   15.90
   5  -3   4  161.88   11.90
   5   3  -4  173.08   11.70
  -5   3   4  165.18   12.00
  -5  -3  -4  167.38   14.40
  -5  -3  -4  165.88   11.50
  -5  -3  -4  159.08   11.60
   5   3  -4  165.18   11.40
   5   3  -4  164.58   11.30
  -5   3   4  151.88   11.70
  -5   3   4  166.28   12.40
   5  -3  -4  169.38   12.10
  -5   3  -4  163.08   11.90
   5  -3  -4  169.18   11.70
   5  -3  -4  159.28   12.00
   5   3   4  164.28   11.40
  -5  -3   4  176.38   11.30
   5   3   4  163.88   11.80
   5  -3  -4  164.68   11.60
  -5   3  -4  175.88   12.30
   5   3   4  170.38   11.10
  -5   3  -4  177.48   15.20
  -5   3   5  118.29    9.30
  -5  -3  -5  101.59    8.40
  -5   3   5  107.39    8.40
  -5  -3  -5  108.29   10.90
  -5   3   5  116.49    8.90
   5   3  -5  110.79    8.40
   5   3  -5  107.59    8.40
   5  -3   5  110.09    7.60
   5   3  -5  115.79    8.40
  -5  -3  -5  116.39    8.70
   5  -3   5  109.79    8.90
   5   3   5  106.69    8.30
   5  -3  -5  117.59    8.50
  -5   3  -5  108.29   11.30
   5   3   5  113.19    8.60
  -5   3  -5  120.59    9.00
   5  -3  -5  114.69    8.50
   5  -3  -5  108.89    8.90
  -5   3  -5  120.09    9.20
   5  -3  -5  111.39    8.90
  -5  -3   5  114.09    8.20
  -5  -3  -6   60.49    8.60
   5  -3   6   47.50    3.90
  -5   3   6   62.29    5.10
  -5   3   6   65.29    6.20
   5  -3   6   48.50    5.90
  -5   3   6   62.19    5.90
   5   3  -6   47.10    5.20
   5   3  -6   50.59    4.90
   5   3  -6   47.00    5.00
  -5  -3  -6   60.39    5.70
  -5  -3  -6   52.99    5.20
   5  -3  -6   59.09    5.80
   5  -3  -6   64.49    5.30
   5   3   6   60.59    5.30
   5  -3  -6   62.49    5.20
  -5   3  -6   51.59    8.80
   5  -3  -6   60.09    5.80
   5   3   6   58.49    5.30
  -5   3  -6   53.49    5.60
  -5   3  -6   61.59    6.90
  -5  -3   6   46.40    5.00
  -5   3   7   63.39    6.70
  -5  -3  -7   68.59    8.50
   5   3  -7   71.09    6.40
   5   3  -7   74.89    6.40
  -5  -3  -7   59.59    6.40
  -5  -3  -7   52.89    5.90
   5  -3   7   83.99    7.20
  -5   3   7   60.99    5.70
   5   3  -7   73.29    6.00
  -5   3   7   67.89    6.90
  -5   3  -7   68.39    6.60
   5  -3  -7   61.69    5.80
   5   3   7   65.29    5.90
   5  -3  -7   61.99    6.60
   5  -3  -7   59.79    5.80
  -5  -3   7   75.79    6.30
   5   3   7   58.69    6.10
  -5   3  -7   69.39    9.20
  -5   3  -7   63.39    7.10
   5  -3  -7   62.19    7.10
  -5   3   8   57.79    7.60
   5   3  -8   70.69    6.20
  -5   3   8   74.09    7.40
   5   3  -8   67.79    6.90
   5  -3   8   69.69    7.90
  -5  -3  -8   70.69    7.20
  -5  -3  -8   65.99    6.70
   5   3  -8   71.99    6.80
  -5  -3  -8   70.59    8.80
   5  -3  -8   79.99    7.40
  -5   3  -8   71.59    7.20
   5   3   8   65.69    6.30
  -5   3  -8   75.49    7.80
   5  -3  -8   67.69    7.20
  -5  -3   8   64.59    6.60
   5  -3  -8   66.89    6.20
   5   3   8   70.99    6.80
   5  -3  -8   68.69    6.10
  -5   3  -8   72.49   11.10
  -5   3   9   34.50    5.60
   5   3  -9   44.80    5.90
  -5  -3  -9   35.20    7.40
  -5  -3  -9   36.80    5.80
  -5  -3  -9   34.30    5.50
  -5   3   9   40.30    6.30
   5   3  -9   43.90    4.90
   5  -3   9   42.30    6.10
   5   3  -9   50.39    6.50
  -5   3  -9   41.40    6.30
  -5   3  -9   44.80    6.20
  -5  -3   9   43.40    5.70
   5  -3  -9   35.30    5.60
   5  -3  -9   42.50    6.00
   5   3   9   25.50    4.90
   5  -3  -9   43.40    4.90
  -5   3  -9   42.40    8.60
  -5   3  10    4.90    3.50
   5   3 -10    8.00    3.60
   5   3 -10   10.20    3.30
  -5   3  10    6.40    3.10
  -5  -3 -10    2.00    3.00
   5  -3  10    4.70    3.00
  -5  -3 -10    5.20    3.60
  -5  -3 -10    5.30    2.80
   5  -3 -10    7.10    3.60
  -5   3 -10   10.20    5.20
  -5   3 -10    4.70    2.80
   5   3  10    4.60    2.80
   5  -3 -10   11.60    3.70
  -5   3 -10    8.90    4.10
   5  -3  11   17.20    4.70
  -5   3  11    7.40    3.90
   5   3 -11    7.80    3.50
  -5   3  11   13.90    4.50
  -5  -3 -11   19.50    6.00
  -5  -3 -11   12.10    4.10
  -5  -3 -11    6.30    3.20
  -5   3 -11   14.50    5.90
   5  -3 -11   11.80    4.20
   5   3  11   14.20    4.10
  -5   3 -11    3.90    4.20
  -5   3 -11   10.00    4.00
   5  -3 -11    8.30    3.80
  -5  -3 -12   16.10    5.40
  -5  -3 -12    9.50    4.40
   5   3 -12   13.90    4.40
  -5  -3 -12   10.20    4.00
  -5   3  12   11.40    4.20
   5  -3  12    7.00    3.60
   5  -3 -12   11.30    4.60
   5   3  12   13.80    4.10
   5  -3 -12   12.80    4.10
  -5   3 -12    5.00    3.40
  -5   3 -12    8.80    4.50
  -5   3 -12    3.50    4.30
  -5  -3 -13   26.20    6.10
   5  -3  13   27.10    6.30
  -5   3  13   24.40    5.40
   5   3 -13   23.40    5.60
  -5  -3 -13   26.60    7.10
  -5  -3 -13    8.50    4.90
   5   3  13   18.00    5.10
   5  -3 -13   20.50    5.70
  -5   3 -13   25.70    7.90
  -5   3 -13    9.60    4.40
  -5   3 -13   13.20    5.70
   5  -3 -13   18.30    5.80
   6  -3   0  530.05   34.70
  -6  -3   0  526.85   36.30
  -6   3   0  498.95   34.80
   6  -3   0  519.55   34.50
   6   3   0  544.95   33.30
  -6  -3   0  518.65   33.30
   6   3   0  564.34   34.30
  -6   3   0  530.55   34.50
   6  -3   0  557.34   34.30
   6  -3   0  546.25   34.40
  -6   3   0  537.05   36.80
   6   3   0  543.35   33.30
   6  -3   1  196.98   14.60
   6  -3   1  218.48   14.30
   6  -3   1  217.58   14.10
  -6   3   1  201.08   14.40
   6   3  -1  215.38   14.20
  -6  -3  -1  196.78   13.50
   6   3  -1  209.78   13.20
  -6   3   1  193.28   16.20
  -6   3   1  206.68   14.80
  -6  -3  -1  203.08   16.30
   6   3  -1  219.38   13.20
   6  -3   1  207.68   14.50
  -6  -3   1  215.38   13.30
   6  -3  -1  212.68   14.20
   6  -3  -1  199.38   14.50
  -6  -3   1  213.78   13.20
   6   3   1  201.18   13.30
   6  -3  -1  206.58   14.40
   6   3   1  204.48   14.00
  -6   3  -1  225.28   17.30
   6  -3  -1  206.58   14.30
  -6   3  -1  200.88   14.70
   6  -3   2  177.18   12.30
   6   3  -2  177.78   11.70
  -6   3   2  141.79   13.40
  -6  -3  -2  153.58   11.10
  -6   3   2  168.28   12.10
  -6  -3  -2  146.89   13.80
   6  -3   2  184.98   11.50
   6  -3   2  171.78   12.00
   6   3  -2  172.88   10.90
  -6   3   2  164.08   12.30
   6  -3   2  175.88   11.80
  -6  -3  -2  163.48   11.00
  -6  -3   2  184.98   11.00
   6  -3  -2  156.68   11.70
  -6   3  -2  176.08   11.90
   6   3   2  161.18   10.90
   6  -3  -2  156.68   11.70
  -6   3  -2  180.88   15.40
   6   3   2  169.38   11.40
  -6   3  -2  171.38   12.30
   6  -3  -2  144.49   11.80
  -6  -3   2  168.38   10.90
   6  -3  -2  165.78   12.00
  -6   3   3   72.29    6.30
   6  -3   3   72.69    5.40
  -6  -3  -3   71.29    5.50
   6   3  -3   70.69    5.80
   6   3  -3   66.39    5.10
  -6  -3  -3   72.59    5.40
   6   3  -3   65.39    5.20
  -6   3   3   60.69    5.80
   6  -3   3   62.89    6.40
  -6  -3  -3   80.59    9.20
   6  -3   3   66.09    6.20
  -6   3   3   64.09    6.30
   6   3   3   74.69    5.40
  -6   3  -3   70.19    6.50
  -6   3  -3   69.29    6.10
  -6  -3   3   68.69    5.30
   6  -3  -3   71.79    5.90
  -6   3  -3   77.79   10.00
   6   3   3   76.39    5.50
  -6  -3   3   67.79    5.20
   6  -3  -3   75.09    6.20
   6  -3  -3   67.49    6.10
   6  -3  -3   68.49    5.80
  -6   3   4   60.99    5.70
  -6  -3  -4   71.89    5.60
   6  -3   4   65.59    5.00
   6   3  -4   64.89    5.20
  -6   3   4   74.49    6.50
   6  -3   4   56.09    6.00
   6   3  -4   62.59    5.20
  -6  -3  -4   65.99    5.30
  -6  -3  -4   72.39    9.30
   6   3  -4   57.89    5.50
  -6   3   4   66.59    6.20
   6  -3  -4   68.19    6.00
   6  -3  -4   68.79    6.10
  -6   3  -4   71.09    6.10
   6   3   4   65.79    5.30
   6  -3  -4   67.99    5.70
   6   3   4   65.69    5.10
   6  -3  -4   66.09    5.70
  -6   3  -4   71.39   10.80
  -6  -3   4   60.39    5.10
  -6  -3   4   58.39    5.30
  -6   3  -4   55.59    6.20
   6   3  -5   47.90    4.70
   6  -3   5   63.09    5.80
  -6  -3  -5   55.19    5.20
  -6   3   5   37.60    5.10
  -6   3   5   49.30    4.90
  -6  -3  -5   53.89    4.80
  -6  -3  -5   49.60    8.50
  -6   3   5   46.80    6.00
   6   3  -5   58.69    5.20
   6  -3   5   51.19    4.10
   6   3  -5   54.29    4.70
   6  -3  -5   53.89    5.00
   6  -3  -5   60.29    5.10
  -6   3  -5   51.79    5.30
  -6   3  -5   50.49    8.80
   6   3   5   48.50    4.80
  -6   3  -5   48.20    6.00
   6   3   5   52.69    5.10
   6  -3  -5   54.89    5.40
  -6  -3   5   53.09    4.70
   6  -3  -5   41.30    5.30
  -6  -3   5   46.40    3.80
  -6   3   6   27.60    4.60
   6   3  -6   24.90    3.60
   6  -3   6   25.30    2.40
  -6  -3  -6   24.70    3.90
  -6   3   6   21.30    3.40
  -6  -3  -6   25.30    6.40
  -6   3   6   21.80    4.10
   6   3  -6   22.50    3.30
   6  -3   6   22.50    4.00
  -6  -3  -6   20.00    3.30
   6   3  -6   28.20    3.70
   6   3   6   21.80    3.40
   6  -3  -6   23.40    3.50
  -6   3  -6   24.90    6.90
  -6  -3   6   28.20    3.60
   6  -3  -6   21.70    3.50
   6   3   6   24.00    3.60
   6  -3  -6   23.50    4.00
  -6   3  -6   22.70    3.70
  -6   3  -6   21.40    4.50
   6  -3  -6   23.00    3.80
   6   3  -7   15.00    3.10
   6   3  -7   20.50    3.40
   6   3  -7    7.90    2.50
  -6   3   7    5.40    3.00
  -6   3   7   11.50    2.70
  -6   3   7   13.80    3.60
  -6  -3  -7    9.30    2.60
   6  -3   7   20.30    3.80
  -6  -3  -7   13.00    5.00
  -6  -3  -7   14.70    3.40
  -6   3  -7   17.10    6.20
   6  -3  -7   10.80    2.70
   6   3   7    8.90    2.60
  -6  -3   7   11.00    2.90
  -6   3  -7   11.80    3.00
  -6   3  -7   17.20    3.80
   6  -3  -7    7.50    2.40
   6  -3  -7   16.20    3.60
   6   3   7    3.70    2.20
   6  -3  -7   15.20    3.50
  -6  -3  -8    8.30    4.30
   6   3  -8    7.70    2.60
  -6   3   8   12.30    3.50
   6  -3   8    7.20    3.20
  -6  -3  -8    6.90    3.00
   6   3  -8   12.90    2.90
   6   3  -8    7.60    2.90
  -6   3   8    4.50    2.80
  -6  -3  -8    9.60    2.70
   6   3   8    8.60    2.90
   6   3   8   10.90    2.70
  -6   3  -8    7.10    4.70
   6  -3  -8   14.20    3.00
   6  -3  -8   12.30    3.30
   6  -3  -8   10.70    2.80
  -6   3  -8    5.90    3.50
   6  -3  -8    8.70    3.10
  -6   3  -8   10.70    3.10
  -6  -3  -9   14.40    3.60
  -6  -3  -9   17.90    5.40
   6   3  -9   17.90    3.40
  -6   3   9   13.60    3.90
   6  -3   9   10.50    3.70
   6   3  -9    7.20    3.00
  -6  -3  -9   12.70    3.70
  -6   3   9    6.90    3.40
  -6   3  -9   14.00    4.70
   6   3   9   12.40    3.50
   6  -3  -9   15.40    4.00
   6  -3  -9   17.40    3.40
   6  -3  -9   21.50    4.60
  -6   3  -9   22.80    6.80
  -6   3  -9   16.00    4.00
  -6  -3 -10   29.70    5.40
   6  -3  10   23.70    5.10
  -6   3  10   18.60    4.90
  -6  -3 -10   29.20    7.00
   6   3 -10   34.10    5.20
  -6   3  10   18.00    4.50
  -6  -3 -10   22.50    4.70
   6   3  10   20.00    4.40
  -6   3 -10   33.00    8.40
   6  -3 -10   24.60    5.00
   6  -3 -10   23.80    5.10
  -6   3 -10   29.60    6.00
  -6   3 -10   21.40    4.60
   6  -3  11   11.60    4.20
  -6   3  11    6.60    3.80
   6   3 -11    6.10    3.30
  -6  -3 -11    9.50    4.60
  -6  -3 -11    6.50    3.50
  -6  -3 -11    8.60    4.20
  -6   3  11    3.20    3.10
   6  -3 -11    7.00    3.40
   6   3  11    6.80    3.50
  -6   3 -11    4.80    4.00
  -6   3 -11    8.30    3.40
   6  -3 -11    5.50    3.70
  -6   3 -11   10.20    4.60
   6   3 -12    1.50    3.00
   6  -3  12   -2.10    2.90
  -6   3  12    4.70    3.60
  -6  -3 -12    0.40    3.50
  -6  -3 -12   16.30    4.50
   6  -3 -12    4.80    3.80
   6  -3 -12    2.40    3.40
  -6   3 -12    8.70    4.90
   6   3  12    2.20    3.40
  -6   3 -12    2.90    4.40
  -6   3 -12    4.30    3.20
  -6  -3 -13   21.40    5.60
   6  -3  13   11.90    5.10
   6   3 -13   15.70    5.00
  -6  -3 -13    5.60    4.70
   6   3  13   18.20    4.70
  -6   3 -13   10.20    5.70
  -6   3 -13   23.70    6.50
   6  -3 -13   17.00    5.20
  -6   3 -13   15.40    5.00
   6  -3 -13   14.00    5.60
   7  -3   0    2.90    2.10
  -7  -3   0    3.00    1.00
   7   3   0    4.50    1.80
   7   3   0    3.70    0.90
   7   3   0    4.80    0.90
  -7   3   0    1.10    2.00
   7  -3   0    2.80    1.70
   7  -3   0    4.50    1.70
  -7   3   0    3.50    2.50
  -7   3   0    5.60    4.30
  -7  -3   0    5.60    3.70
   7  -3   0    4.30    2.20
  -7  -3  -1  146.89   13.50
   7   3  -1  167.88    9.80
  -7   3   1  142.29   11.50
   7  -3   1  162.28   10.80
  -7  -3  -1  139.19   10.20
   7  -3   1  157.38   11.30
   7   3  -1  156.98   10.90
  -7   3   1  134.89   13.20
   7  -3   1  165.48   11.10
  -7   3   1  144.09   11.20
   7   3  -1  159.28    9.90
   7  -3   1  158.78   11.50
   7  -3  -1  140.59   10.80
  -7  -3   1  161.58    9.90
   7  -3  -1  136.89   11.10
  -7   3  -1  172.78   14.40
  -7  -3   1  161.68   10.00
   7   3   1  137.09    9.80
  -7  -3   1  161.38   13.60
   7  -3  -1  134.09   10.90
   7  -3  -1  141.69   11.10
   7   3   1  138.89   10.70
  -7   3  -1  160.18   11.60
  -7  -3  -2  180.28   11.40
  -7   3   2  179.18   14.90
   7   3  -2  165.88   11.30
   7  -3   2  151.88   12.00
   7   3  -2  151.08   12.00
  -7  -3  -2  182.28   11.60
  -7   3   2  176.38   12.80
   7  -3   2  156.18   12.60
  -7   3   2  193.38   12.70
   7  -3   2  152.78   12.30
   7  -3   2  158.58   11.70
  -7  -3  -2  192.88   15.40
   7  -3  -2  169.18   12.20
   7  -3  -2  183.98   12.50
  -7  -3   2  160.28   11.20
  -7   3  -2  161.38   12.70
   7  -3  -2  189.18   12.60
  -7  -3   2  170.78   11.30
   7   3   2  171.48   11.90
  -7   3  -2  163.38   12.20
   7  -3  -2  183.38   12.40
  -7   3  -2  169.08   16.10
   7   3   2  178.68   11.30
  -7   3   3   39.50    4.90
   7   3  -3   45.10    3.60
   7   3  -3   43.40    4.30
  -7  -3  -3   31.40    7.50
   7  -3   3   43.10    5.00
  -7   3   3   33.80    4.90
   7  -3   3   40.30    3.80
  -7  -3  -3   42.30    3.60
   7  -3   3   42.50    5.40
  -7  -3  -3   41.30    4.10
   7   3  -3   44.50    3.80
  -7   3  -3   41.00    5.30
  -7   3  -3   49.50    4.80
   7   3   3   36.10    3.90
  -7  -3   3   44.50    3.70
  -7   3  -3   33.00    7.90
   7  -3  -3   38.50    4.80
   7  -3  -3   30.20    4.30
  -7  -3   3   41.30    3.60
   7  -3  -3   44.10    4.70
   7   3   3   38.50    3.60
   7  -3  -3   44.00    4.30
  -7   3   4   58.49    5.50
  -7  -3  -4   54.59    5.20
   7  -3   4   59.89    5.90
   7  -3   4   45.90    6.10
   7   3  -4   55.59    4.60
   7  -3   4   49.70    4.50
  -7  -3  -4   66.59   10.20
  -7   3   4   61.19    6.00
  -7   3   4   68.59    6.70
   7   3  -4   58.99    5.40
   7   3  -4   48.50    4.70
  -7  -3  -4   55.09    4.70
  -7   3  -4   51.69    6.30
   7  -3  -4   55.89    5.40
  -7  -3   4   49.60    4.70
   7  -3  -4   59.49    5.80
   7  -3  -4   54.69    5.30
  -7   3  -4   61.19    5.70
   7   3   4   57.39    4.80
  -7   3  -4   53.39   10.20
   7  -3  -4   50.69    5.20
   7   3   4   57.99    4.90
  -7  -3   4   50.29    4.70
  -7  -3  -5   42.50    8.80
  -7   3   5   28.20    4.50
   7  -3   5   30.50    4.50
  -7   3   5   35.20    4.60
  -7  -3  -5   35.40    4.00
  -7  -3  -5   33.80    4.30
   7   3  -5   27.20    4.00
   7   3  -5   29.90    3.80
   7   3  -5   28.50    3.80
  -7   3   5   39.40    5.20
   7  -3   5   30.60    3.10
   7  -3  -5   39.40    5.00
  -7   3  -5   25.40    8.20
  -7  -3   5   30.10    3.80
   7  -3  -5   36.50    4.80
   7   3   5   32.60    3.60
  -7  -3   5   28.60    3.90
   7  -3  -5   33.30    4.50
   7   3   5   37.90    4.10
  -7   3  -5   29.10    5.10
   7  -3  -5   38.50    4.80
  -7   3  -5   23.60    4.00
  -7  -3  -6   20.40    3.40
  -7   3   6   23.60    4.40
   7  -3   6   22.30    4.20
  -7  -3  -6   27.10    4.30
  -7  -3  -6   35.80    7.90
  -7   3   6   33.50    4.80
   7   3  -6   26.90    3.90
   7   3  -6   22.40    3.60
  -7   3   6   27.40    4.10
   7   3   6   27.50    3.80
  -7   3  -6   18.30    3.70
   7  -3  -6   27.10    4.00
   7  -3  -6   28.50    4.10
  -7   3  -6   16.70    4.20
  -7   3  -6   25.50    7.80
   7  -3  -6   21.30    4.10
   7  -3  -6   35.90    4.90
  -7  -3  -7    2.00    2.50
   7   3  -7    2.70    2.10
  -7   3   7    0.70    1.80
  -7   3   7    7.80    3.10
  -7  -3  -7   -0.40    1.70
   7  -3   7    1.30    2.40
  -7  -3  -7    6.50    4.80
   7   3  -7    6.70    2.40
  -7   3   7    1.60    2.60
   7   3   7    5.40    2.40
  -7   3  -7    2.80    4.50
   7  -3  -7    8.00    2.90
  -7   3  -7   -2.10    1.70
   7  -3  -7    1.50    2.10
   7  -3  -7    7.50    2.90
  -7   3  -7    6.30    3.40
   7  -3  -7    1.60    2.20
  -7  -3  -8   26.30    4.80
  -7  -3  -8   20.30    4.00
   7  -3   8   26.70    4.90
  -7  -3  -8   28.90    6.90
   7   3  -8   25.90    4.30
  -7   3   8   32.40    5.10
  -7   3   8   24.20    4.90
   7   3  -8   29.30    4.30
  -7   3  -8   20.30    4.30
   7   3   8   20.70    4.10
   7  -3  -8   26.70    4.60
  -7   3  -8   37.20    8.70
   7  -3  -8   23.10    4.00
   7  -3  -8   25.30    4.60
   7  -3  -8   23.20    3.90
  -7   3  -8   25.00    5.20
   7  -3   9   10.60    3.70
  -7  -3  -9    7.90    3.50
  -7  -3  -9   10.00    4.60
  -7   3   9    8.50    3.50
  -7   3   9   12.30    3.90
   7   3  -9    7.90    3.00
   7   3  -9    8.90    3.20
  -7   3  -9    0.20    3.20
   7  -3  -9    5.20    2.70
   7  -3  -9    5.20    3.20
   7   3   9    6.10    3.00
  -7   3  -9    8.10    3.20
  -7   3  -9    6.40    4.80
   7  -3  -9    8.70    3.40
  -7  -3 -10   15.70    4.30
  -7  -3 -10   15.30    5.20
   7  -3  10    4.20    3.20
   7   3 -10    8.20    3.30
  -7   3  10    4.80    3.40
  -7   3  10   11.90    4.10
  -7   3 -10   11.10    3.50
   7  -3 -10    8.80    3.90
  -7   3 -10   19.20    6.90
   7   3  10    5.30    3.00
  -7   3 -10   11.20    4.40
   7  -3 -10   11.80    3.80
   7  -3 -10    8.10    2.90
   7   3 -11   14.30    4.30
  -7  -3 -11    8.80    4.20
   7  -3  11    9.80    4.20
  -7   3  11   11.00    4.00
  -7  -3 -11   15.20    4.80
  -7   3  11    5.00    3.40
  -7   3 -11    9.70    3.90
  -7   3 -11   12.00    5.00
   7   3  11    4.60    3.20
   7  -3 -11   13.90    4.40
   7  -3 -11    0.70    3.00
  -7   3 -11   13.20    5.90
  -7  -3 -12   14.30    4.30
   7  -3  12   11.60    4.80
  -7  -3 -12   -0.50    3.30
   7   3 -12    0.30    3.00
   7  -3 -12    8.10    6.40
  -7   3 -12   -0.60    4.10
   7   3  12    0.20    3.00
   7  -3 -12    2.80    3.70
  -7   3 -12    1.20    3.10
  -7   3 -12    9.00    4.50
  -8   3   0   28.50    4.70
  -8  -3   0   27.30    2.70
  -8  -3   0   30.00    6.70
   8  -3   0   35.80    4.50
  -8   3   0   30.40    7.10
   8  -3   0   26.30    3.60
   8  -3   0   28.70    4.40
   8   3   0   26.80    2.50
  -8   3   0   27.40    4.10
   8  -3   0   24.50    3.90
   8   3   0   30.20    2.50
   8   3   0   25.60    3.60
   8   3  -1  100.39    7.30
   8  -3   1  105.89    8.60
   8  -3   1  100.79    8.70
  -8   3   1  123.79    9.10
  -8   3   1  100.79   11.70
  -8  -3  -1  105.09   11.60
   8  -3   1  111.09    9.30
   8   3  -1  102.89    8.30
   8  -3   1  107.59    8.20
  -8   3   1  111.69    9.20
  -8  -3  -1  102.79    7.70
  -8  -3  -1  114.09    8.10
   8   3  -1  103.19    7.10
  -8  -3   1  118.39   11.70
   8  -3  -1  105.39    8.70
   8  -3  -1  115.99    8.90
  -8  -3   1  103.49    7.30
   8   3   1  108.49    7.30
   8  -3  -1  113.89    8.70
  -8   3  -1   89.79   11.50
   8   3   1  115.69    8.30
  -8   3  -1  102.29    9.10
   8  -3  -1  111.59    8.40
   8  -3   2  137.99   10.40
   8  -3   2  145.59   11.60
  -8  -3  -2  148.49    9.90
  -8  -3  -2  131.09   14.00
  -8   3   2  139.19   11.40
  -8  -3  -2  141.09   10.30
   8   3  -2  148.09    9.90
   8  -3   2  143.29   11.10
  -8   3   2  148.29   14.10
  -8   3   2  144.09   11.30
   8   3  -2  148.59   10.90
   8  -3   2  149.39   10.90
  -8   3  -2  160.28   11.20
  -8  -3   2  148.49    9.80
   8  -3  -2  145.49   10.90
   8   3   2  145.09    9.90
   8   3   2  146.29   10.60
   8  -3  -2  152.18   11.30
   8  -3  -2  145.29   10.90
   8   3   2  138.69   10.20
  -8   3  -2  155.08   11.70
  -8   3  -2  136.69   14.80
  -8  -3   2  155.98   10.60
   8  -3  -2  148.69   11.10
  -8  -3  -3   11.30    2.60
  -8  -3  -3    9.80    1.70
   8  -3   3    3.00    1.70
  -8   3   3    2.50    4.60
  -8   3   3    7.30    2.80
   8   3  -3    6.50    2.30
  -8   3   3    7.80    3.30
   8  -3   3    9.50    3.10
   8   3  -3    6.30    1.90
   8  -3   3    6.00    3.20
  -8  -3  -3   12.50    6.20
  -8   3  -3    9.00    3.30
   8  -3  -3    9.00    2.60
  -8  -3   3    6.70    1.60
   8  -3  -3    6.60    3.00
  -8   3  -3    7.60    2.60
   8  -3  -3   18.30    3.40
   8   3   3    6.50    2.00
   8  -3  -3    6.10    2.20
  -8   3  -3   12.90    7.10
   8   3   3    8.90    1.80
  -8   3   4   20.70    3.90
  -8  -3  -4   25.90    3.30
  -8  -3  -4   31.60    8.80
   8  -3   4   31.80    4.60
  -8   3   4   25.80    4.50
  -8  -3  -4   27.70    3.90
   8  -3   4   21.80    3.10
   8   3  -4   27.30    3.40
   8  -3   4   20.80    4.50
   8   3  -4   20.40    3.70
  -8   3   4   25.00    4.30
  -8   3  -4   21.00    4.40
  -8   3  -4   22.30    8.50
   8   3   4   21.90    3.30
   8  -3  -4   29.90    4.40
   8  -3  -4   26.60    4.20
   8  -3  -4   24.70    4.00
  -8  -3   4   19.60    3.10
   8   3   4   27.00    3.30
  -8   3  -4   20.30    3.70
   8  -3  -4   22.40    3.70
  -8   3   5  169.68   13.10
   8   3  -5  150.88   12.20
   8  -3   5  157.78   13.30
  -8  -3  -5  174.08   12.40
   8  -3   5  159.28   12.70
  -8   3   5  179.28   13.00
  -8   3   5  171.88   12.50
  -8  -3  -5  170.08   17.50
   8   3  -5  160.68   11.80
   8  -3   5  163.08   11.50
  -8   3  -5  156.88   17.50
   8  -3  -5  175.68   12.40
   8   3   5  169.58   11.70
   8  -3  -5  165.08   12.70
  -8   3  -5  161.58   13.10
  -8   3  -5  148.09   12.40
   8   3   5  177.88   12.10
   8  -3  -5  168.38   12.50
   8  -3  -5  180.98   12.80
  -8  -3   5  167.78   12.00
  -8   3   6   50.19    6.60
  -8  -3  -6   61.69    6.40
   8  -3   6   60.09    6.90
  -8   3   6   61.49    7.40
   8   3  -6   59.69    5.80
   8   3  -6   57.29    5.90
  -8   3   6   54.39    5.80
  -8  -3  -6   60.69   10.80
   8   3   6   54.89    5.60
   8  -3  -6   66.09    7.00
  -8   3  -6   52.69    7.10
  -8   3  -6   57.29   10.80
   8  -3  -6   58.49    6.20
   8  -3  -6   57.99    6.90
   8  -3  -6   62.09    6.00
  -8   3  -6   54.99    6.60
   8   3  -7   63.59    6.10
  -8   3   7   60.69    7.20
   8   3  -7   57.39    5.90
  -8   3   7   56.89    5.90
   8  -3   7   48.10    6.60
  -8   3   7   56.39    7.40
  -8  -3  -7   56.69   10.30
  -8  -3  -7   58.09    6.90
   8   3   7   67.59    6.10
   8  -3  -7   64.19    6.60
   8  -3  -7   60.99    7.20
   8  -3  -7   54.79    5.80
  -8   3  -7   52.19   10.60
   8  -3  -7   56.39    6.50
  -8   3  -7   48.00    6.50
  -8   3  -7   43.40    6.60
  -8  -3  -8   68.09   11.00
   8  -3   8   61.59    7.40
  -8   3   8   60.99    7.90
  -8   3   8   47.10    6.80
   8   3  -8   59.99    6.90
  -8  -3  -8   51.99    7.00
   8   3  -8   70.89    7.30
  -8   3  -8   69.59    8.40
   8  -3  -8   52.89    7.10
  -8   3  -8   61.89    7.60
   8   3   8   53.59    6.50
  -8   3  -8   62.89   11.10
   8  -3  -8   56.69    6.80
   8  -3  -8   49.99    7.00
   8  -3  -8   61.49    6.00
   8  -3   9    4.40    3.00
   8   3  -9    3.40    2.70
  -8  -3  -9    5.70    4.10
  -8   3   9   -4.00    1.60
  -8  -3  -9   -0.80    2.80
  -8   3   9    1.20    3.10
   8   3  -9    5.20    2.90
  -8   3  -9    0.60    2.20
   8  -3  -9    0.40    2.40
   8   3   9    3.90    2.80
  -8   3  -9   -3.50    2.70
   8  -3  -9    7.20    3.10
   8  -3  -9   -0.60    2.60
  -8   3  -9    5.20    4.50
  -8  -3 -10    3.60    3.50
  -8  -3 -10   12.60    5.00
   8   3 -10    6.10    2.90
  -8   3  10    4.30    3.50
   8   3 -10    8.40    3.50
   8  -3  10    9.20    3.80
  -8   3 -10    9.10    5.50
  -8   3 -10    5.10    3.10
   8  -3 -10    6.30    3.30
   8  -3 -10    0.80    2.50
   8  -3 -10    3.80    3.50
  -8   3 -10   12.60    4.70
   8   3  10    7.10    3.40
  -8  -3 -11   11.80    4.20
   8   3 -11    8.00    3.80
  -8  -3 -11    5.30    3.90
   8  -3  11    2.50    3.40
  -8   3  11   -1.90    2.90
   8  -3 -11    1.90    3.10
  -8   3 -11    3.10    2.80
  -8   3 -11    0.50    4.00
   8   3  11    3.50    3.30
  -8   3 -11   16.10    6.10
   8   3 -12   15.50    4.50
  -8  -3 -12    8.50    4.50
   8  -3  12    0.70    3.60
  -8   3 -12   -2.40    4.00
  -8   3 -12   14.70    5.90
   8  -3 -12    3.60    3.80
  -8   3 -12   -0.10    2.60
   8   3  12   16.30    4.90
   9  -3   0   19.20    3.80
   9   3   0   12.40    1.80
   9  -3   0   13.00    3.40
  -9   3   0   12.60    6.20
  -9  -3   0   12.80    5.60
   9   3   0    4.80    2.20
  -9   3   0   11.00    3.80
  -9  -3   0   13.80    2.00
   9  -3   0   10.90    2.60
  -9   3   0   10.20    3.30
   9  -3   0   13.70    3.70
   9  -3   1   26.40    4.60
  -9   3   1   27.80    4.70
   9   3  -1   25.20    2.80
  -9   3   1   30.20    5.00
  -9  -3  -1   33.10    3.50
   9   3  -1   27.50    4.00
  -9   3   1   26.40    7.70
   9  -3   1   20.70    3.40
   9  -3   1   25.00    4.30
  -9  -3  -1   39.90    8.40
   9  -3   1   20.40    4.20
  -9  -3   1   27.00    2.60
   9  -3  -1   25.30    3.90
   9   3   1   21.30    3.50
   9  -3  -1   34.80    4.70
  -9   3  -1   29.90    8.00
  -9   3  -1   27.80    4.20
  -9  -3   1   28.60    7.40
  -9   3  -1   29.80    5.10
   9  -3  -1   32.40    4.70
   9  -3  -1   30.30    4.70
   9   3   1   26.20    2.70
   9  -3   2   47.90    6.10
  -9   3   2   63.79   10.40
  -9  -3  -2   55.09    5.30
  -9   3   2   55.89    6.30
  -9  -3  -2   60.59   10.00
   9  -3   2   55.89    6.90
   9   3  -2   49.80    4.80
   9   3  -2   63.89    5.90
   9  -3   2   62.99    5.40
  -9   3   2   68.09    6.90
  -9   3  -2   46.90   10.10
  -9   3  -2   56.59    5.80
   9  -3  -2   61.09    5.90
  -9   3  -2   55.09    7.10
   9  -3  -2   62.49    6.50
   9   3   2   63.09    5.60
   9  -3  -2   60.59    5.90
   9  -3  -2   69.19    6.00
   9   3   2   61.39    4.70
  -9  -3   2   59.59    9.80
  -9  -3   2   54.89    4.50
  -9  -3  -3  133.89   10.60
   9  -3   3  152.78   12.00
  -9   3   3  149.19   15.00
  -9   3   3  138.69   11.50
   9   3  -3  144.89   10.20
   9  -3   3  143.39   11.30
   9  -3   3  138.79   10.60
  -9  -3  -3  131.99   15.50
   9   3  -3  142.09   11.00
  -9   3   3  139.69   11.40
   9   3   3  142.89   10.60
   9  -3  -3  147.29   11.20
   9  -3  -3  141.69   11.30
  -9   3  -3  146.79   11.90
  -9   3  -3  145.39   11.10
   9   3   3  150.88   10.20
  -9   3  -3  147.49   16.80
   9  -3  -3  160.08   11.40
  -9  -3   3  145.69   10.10
   9  -3  -3  145.29   11.20
   9  -3   4  316.77   20.80
  -9  -3  -4  288.17   25.80
  -9   3   4  316.77   21.80
  -9   3   4  318.57   22.10
  -9  -3  -4  302.67   21.00
   9   3  -4  323.17   20.60
   9  -3   4  309.57   21.60
   9  -3   4  299.17   22.10
   9   3  -4  301.87   21.40
  -9   3   4  306.17   21.60
  -9   3   4  313.27   25.20
   9   3   4  310.57   20.80
   9  -3  -4  329.27   21.50
  -9   3  -4  316.37   27.00
  -9   3  -4  330.37   21.60
   9  -3  -4  298.57   21.40
   9  -3  -4  298.77   21.50
   9  -3  -4  323.87   21.70
   9   3   4  303.77   20.50
  -9   3  -4  316.27   22.10
  -9  -3   4  307.27   20.60
   9  -3   5  137.99   10.70
   9   3  -5  148.29   11.70
  -9  -3  -5  156.48   11.60
   9   3  -5  149.39   11.10
  -9   3   5  147.19   11.80
   9  -3   5  146.69   12.00
  -9   3   5  163.18   12.40
  -9   3   5  154.88   12.40
   9  -3   5  154.28   12.80
  -9  -3  -5  158.68   17.00
   9  -3  -5  157.58   12.10
   9  -3  -5  158.28   12.00
  -9   3  -5  138.69   11.70
   9  -3  -5  156.88   11.80
  -9  -3   5  162.08   11.30
   9   3   5  154.68   11.00
  -9   3  -5  145.59   12.50
  -9   3  -5  149.69   16.90
   9   3   5  152.58   11.20
   9  -3  -5  152.08   11.90
   9  -3   6   47.00    6.90
   9   3  -6   34.70    5.20
  -9  -3  -6   43.40    5.70
  -9   3   6   46.30    5.80
   9  -3   6   42.10    5.90
  -9   3   6   45.20    6.20
  -9   3   6   52.19    6.60
   9   3  -6   37.20    4.80
  -9  -3  -6   42.10    9.80
   9  -3  -6   43.40    5.60
   9  -3  -6   46.90    6.00
   9   3   6   42.20    5.10
  -9   3  -6   43.00    5.60
  -9   3  -6   34.80    9.80
   9  -3  -6   43.00    5.60
   9  -3  -6   46.90    6.10
  -9   3  -6   39.40    6.30
   9  -3   7    7.60    3.30
  -9  -3  -7    6.40    3.10
  -9   3   7    9.80    3.80
   9   3  -7    7.10    3.10
  -9   3   7    7.40    3.20
   9   3  -7    6.60    2.60
  -9  -3  -7    4.70    5.60
   9  -3  -7   10.90    3.50
   9  -3  -7    4.30    2.60
  -9   3  -7    6.30    6.20
  -9   3  -7    4.70    3.70
   9  -3  -7    9.90    3.50
   9  -3  -7    3.70    2.70
   9   3   7   10.60    3.00
  -9   3  -7    3.90    2.60
  -9  -3  -8   12.10    6.00
  -9   3   8    4.60    3.00
   9   3  -8    4.80    2.60
   9  -3   8    4.80    3.20
  -9  -3  -8    2.80    3.00
   9   3  -8    5.10    3.00
  -9   3  -8    4.00    5.30
  -9   3  -8    2.70    2.70
   9   3   8    4.30    2.70
   9  -3  -8    7.90    3.60
   9  -3  -8    7.70    3.20
  -9   3  -8   -3.80    3.20
   9  -3  -8    3.20    2.70
   9   3  -9   15.50    3.90
   9  -3   9    7.80    3.60
  -9  -3  -9   15.40    4.40
   9   3  -9   10.90    3.70
  -9   3   9    9.50    3.70
  -9  -3  -9   14.10    5.80
  -9   3  -9    5.00    4.00
   9   3   9    9.40    3.50
  -9   3  -9   10.70    3.60
   9  -3  -9   14.40    4.00
  -9   3  -9   14.00    6.20
   9  -3  -9   10.20    4.10
  -9  -3 -10    8.60    4.10
  -9   3  10    5.90    3.70
  -9  -3 -10   -3.50    3.10
   9   3 -10   -2.60    2.40
   9   3 -10   -0.50    2.70
   9  -3  10    0.10    3.10
   9  -3 -10    5.30    3.60
   9  -3 -10   -3.00    2.60
   9   3  10   -2.90    2.60
  -9   3 -10    5.30    4.20
  -9   3 -10    2.90    3.80
  -9   3 -10    1.30    2.80
   9  -3  11    4.30    3.80
  -9  -3 -11    5.80    4.20
   9   3 -11    8.90    4.00
  -9   3  11    6.50    3.90
  -9  -3 -11   22.10    5.20
  -9   3 -11    7.70    4.60
   9   3  11    5.20    3.60
  -9   3 -11   16.90    6.10
   9  -3 -11   15.50    5.10
  10  -3   0   13.70    3.00
 -10  -3   0    9.30    6.20
  10   3   0   12.70    1.90
 -10  -3   0   11.00    2.00
  10  -3   0   16.80    3.90
  10  -3   0   12.60    3.50
  10  -3   0    2.30    2.60
  10   3   0   11.40    2.80
 -10   3   0   12.40    6.90
 -10   3   0   21.70    4.10
 -10   3   1   23.90    7.90
 -10   3   1   18.50    4.20
 -10  -3  -1   15.90    2.80
 -10   3   1   16.50    4.20
  10  -3   1   17.50    4.20
 -10  -3  -1   11.80    7.00
  10   3  -1   13.90    2.30
  10  -3   1   22.60    3.70
  10  -3   1   17.20    4.00
  10   3  -1   12.60    3.00
  10   3   1   17.10    3.20
  10   3   1   17.00    2.30
  10  -3  -1   16.90    3.50
  10  -3  -1   15.50    3.90
 -10   3  -1   18.50    8.30
  10  -3  -1   18.90    3.90
 -10  -3   1   17.50    6.70
  10  -3  -1   16.40    4.10
 -10   3  -1   18.00    4.60
 -10   3  -1   22.20    4.00
 -10  -3   1   20.70    2.40
 -10   3   2   26.50    8.20
 -10   3   2   12.80    3.90
  10  -3   2   20.00    4.60
  10  -3   2   14.80    3.90
  10   3  -2    7.60    2.80
  10  -3   2   15.00    3.20
  10   3  -2   22.90    2.80
 -10  -3  -2   16.60    3.20
 -10   3   2   13.60    3.80
 -10  -3  -2   20.50    7.50
 -10   3  -2   17.90    3.80
  10  -3  -2   19.10    4.10
  10  -3  -2    6.20    2.70
  10  -3  -2   13.20    3.30
 -10   3  -2   17.90    4.50
  10   3   2    7.70    2.70
  10   3   2   15.40    2.30
 -10  -3   2   23.40    2.60
 -10  -3   2   19.30    6.60
 -10   3  -2   32.10    9.70
  10  -3  -2   14.10    3.70
  10  -3   3   32.00    5.90
  10   3  -3   39.10    4.10
 -10   3   3   40.20    5.90
 -10   3   3   43.50    9.30
  10  -3   3   41.60    5.50
 -10  -3  -3   43.80    4.90
 -10  -3  -3   46.50   10.50
 -10   3   3   27.00    5.00
  10   3  -3   36.80    5.10
  10  -3   3   37.80    4.70
 -10   3  -3   35.30   10.10
  10  -3  -3   35.10    5.20
  10   3   3   36.40    4.70
  10  -3  -3   38.30    5.60
  10  -3  -3   37.90    5.30
 -10   3  -3   36.50    5.90
 -10  -3   3   33.40    3.60
 -10   3  -3   38.20    5.10
  10   3   3   39.60    3.90
  10  -3  -3   36.30    5.20
  10  -3   4  112.39    8.50
 -10  -3  -4   98.69   15.10
 -10  -3  -4   82.89    8.50
  10   3  -4  122.69    8.30
 -10   3   4   87.99    9.20
  10  -3   4  119.69    9.70
 -10   3   4   99.49   12.40
  10  -3   4  120.39   10.30
 -10   3   4  118.99   10.20
  10   3  -4  106.49    9.00
  10  -3  -4   91.19    9.00
  10  -3  -4   94.49    8.90
 -10   3  -4  112.59   10.00
  10   3   4   93.89    8.00
 -10   3  -4  119.59   15.70
  10   3   4   94.59    8.40
  10  -3  -4   99.69    9.00
 -10  -3   4  119.29    8.20
 -10   3  -4  134.19    9.50
  10  -3  -4  100.89    8.90
  10  -3   5   73.89    7.30
  10  -3   5   74.09    8.00
 -10  -3  -5   68.79    6.80
  10  -3   5   68.89    5.90
 -10   3   5   59.59    7.70
 -10   3   5   68.09    7.10
  10   3  -5   68.09    6.80
  10   3  -5   65.99    6.10
 -10  -3  -5   68.39   12.70
  10   3   5   52.39    5.80
  10   3   5   62.69    5.90
 -10   3  -5   67.59    6.90
 -10   3  -5   60.39   12.70
  10  -3  -5   68.89    6.90
 -10   3  -5   70.79    7.70
  10  -3  -5   72.59    7.20
  10  -3  -5   71.69    7.90
 -10  -3   5   66.29    6.00
 -10  -3  -6   22.50    8.40
 -10   3   6   19.30    4.00
  10   3  -6   14.70    3.70
  10  -3   6   17.80    4.00
  10   3  -6   24.80    3.80
  10  -3   6    9.70    4.30
 -10  -3  -6   12.20    3.50
 -10   3   6   16.10    4.10
 -10   3  -6   15.60    4.80
  10  -3  -6   21.50    4.20
  10  -3  -6   16.10    4.00
 -10  -3   6   19.70    3.60
 -10   3  -6   26.60    9.30
 -10   3  -6   18.60    3.90
  10   3   6   17.70    3.30
  10  -3  -6   14.20    3.80
  10  -3   7   29.40    6.00
  10  -3   7   16.70    4.40
 -10  -3  -7   22.80    4.50
  10   3  -7   28.90    4.50
 -10  -3  -7   28.30    8.70
  10   3  -7   19.70    4.50
 -10   3   7   27.60    5.20
 -10   3  -7   27.30    9.40
 -10   3  -7   26.70    5.00
 -10   3  -7   16.70    4.80
  10  -3  -7   29.70    5.20
  10  -3  -7   23.30    4.60
  10   3   7   22.90    4.00
  10  -3  -7   20.20    4.30
  10   3  -8   -1.60    2.70
  10   3  -8    8.00    3.00
 -10  -3  -8    4.90    5.60
 -10  -3  -8   -0.90    3.00
 -10   3   8    4.60    3.10
  10  -3   8   -1.80    2.70
  10  -3  -8    0.70    2.70
  10  -3  -8    0.90    3.10
  10   3   8    0.30    2.30
 -10   3  -8    5.20    5.50
 -10   3  -8   -3.60    3.30
  10  -3  -8    0.80    2.80
 -10  -3  -9   13.10    5.70
  10   3  -9    3.80    3.20
 -10  -3  -9    0.30    3.20
 -10   3   9   -0.70    3.20
  10   3  -9    8.50    3.20
  10  -3   9    3.30    3.50
  10  -3  -9    1.80    3.00
 -10   3  -9   -1.10    3.80
  10   3   9   -0.40    2.70
  10  -3  -9    3.60    3.40
 -10   3  -9    8.30    5.40
  10  -3  10    4.40    4.10
 -10  -3 -10   16.50    5.80
  10   3 -10   13.00    3.90
  10   3 -10    4.10    3.40
 -10   3  10    8.60    4.30
 -10  -3 -10    1.70    3.90
  10  -3 -10   12.80    4.80
 -10   3 -10   -3.30    4.00
 -10   3 -10   19.00    7.30
  10   3  10    1.40    2.80
  10  -3 -10    7.90    3.80
  10  -3  11   21.30    5.70
 -10   3  11   18.20    5.70
 -10  -3 -11   12.80    5.20
  10   3 -11   16.40    4.70
 -10   3 -11   30.60    8.20
 -10   3 -11   11.00    5.20
  10  -3 -11   24.40    5.90
 -11  -3   0    6.10    1.70
  11   3   0    2.50    2.50
 -11   3   0    8.70    3.80
 -11  -3   0    9.00    6.20
  11   3   0    6.20    1.60
 -11   3   0   11.00    7.60
  11  -3   0    4.00    2.20
  11  -3   0    1.70    3.10
 -11   3   1   20.40    7.50
 -11  -3  -1   13.10    7.40
 -11  -3  -1   14.90    2.80
  11   3  -1   16.90    3.70
  11  -3   1   10.60    3.10
  11  -3   1   21.80    4.40
 -11   3   1   10.00    3.80
  11  -3  -1   13.90    4.00
 -11  -3   1   26.90    2.90
 -11   3  -1   22.70    9.20
 -11  -3   1   21.80    7.70
  11  -3  -1   11.80    3.70
  11   3   1   13.40    3.50
 -11   3  -1   16.50    4.60
  11   3   1   18.00    2.40
  11  -3  -1   17.00    4.00
 -11   3   2   79.39    7.70
 -11  -3  -2   75.89    6.60
  11  -3   2   76.49    7.80
  11  -3   2   72.69    6.90
 -11  -3  -2   70.19   12.10
 -11   3   2   80.59   12.50
  11   3  -2   68.89    6.00
  11   3  -2   69.29    7.00
 -11   3  -2   80.79    8.40
  11   3   2   70.09    6.90
  11  -3  -2   81.49    7.30
 -11   3  -2   71.99   13.70
 -11  -3   2   89.09   12.90
  11  -3  -2   76.39    7.80
 -11  -3   2   72.49    5.70
  11  -3  -2   67.29    7.40
  11   3   2   70.49    5.80
  11  -3   3   94.19    7.90
  11   3  -3   88.69    7.30
 -11   3   3   96.79   13.00
 -11   3   3  102.59    9.00
 -11  -3  -3   90.59   14.70
 -11  -3  -3   85.99    7.80
  11   3  -3   89.89    8.40
  11  -3   3   92.09    8.80
  11  -3  -3  100.69    8.90
  11   3   3   92.59    8.10
 -11  -3   3   91.09   11.90
  11  -3  -3   87.99    8.30
  11   3   3   95.79    7.20
 -11  -3   3   90.09    7.00
 -11   3  -3   87.39   15.30
 -11   3  -3   94.09    9.20
  11  -3  -3   90.99    8.60
 -11  -3  -4  233.78   16.00
  11  -3   4  213.48   16.60
  11   3  -4  207.48   16.30
 -11   3   4  230.28   20.90
 -11   3   4  228.18   17.00
  11   3  -4  215.78   15.30
  11  -3   4  230.38   15.80
 -11  -3  -4  232.88   22.40
  11  -3  -4  235.98   16.70
  11   3   4  232.68   15.40
  11  -3  -4  240.98   16.80
 -11   3  -4  184.98   21.30
  11   3   4  235.98   16.00
 -11   3  -4  227.38   17.20
  11  -3  -4  220.28   16.60
 -11  -3   4  201.28   15.20
 -11  -3  -5   29.80   10.30
 -11   3   5   35.50    5.90
 -11   3   5   34.50    5.80
  11   3  -5   31.50    5.30
  11   3  -5   50.59    5.20
  11  -3   5   42.10    5.10
 -11   3   5   38.40    9.40
 -11  -3  -5   29.90    5.10
  11  -3   5   47.60    6.20
  11  -3  -5   33.60    5.50
  11   3   5   42.10    5.10
 -11   3  -5   70.39   13.70
 -11   3  -5   36.10    6.20
 -11  -3   5   46.10    4.50
  11  -3  -5   38.90    5.90
  11   3   5   37.60    4.60
  11  -3  -5   28.90    5.10
 -11  -3  -6  104.69    9.30
  11  -3   6  108.49    9.70
 -11   3   6  114.09    9.90
  11   3  -6  108.29    9.70
 -11  -3  -6  120.69   17.10
  11   3  -6   96.99    8.40
  11  -3  -6   92.49    9.20
  11  -3  -6  105.39    9.50
 -11  -3   6   96.09    8.50
 -11   3  -6  114.09   17.40
  11   3   6   94.89    8.50
  11  -3  -6   84.49    8.80
 -11   3  -6   98.29   10.00
  11   3  -7    4.00    2.60
  11   3  -7    0.80    2.80
  11  -3   7    3.90    3.40
 -11  -3  -7    0.00    3.00
 -11  -3  -7   11.50    7.50
 -11   3   7    2.00    3.00
  11  -3  -7   -4.10    2.80
  11  -3  -7    4.00    2.90
  11  -3  -7    1.60    3.00
 -11   3  -7    2.60    3.90
  11   3   7    1.40    2.30
 -11   3  -7   -2.00    6.40
 -11   3   8   18.70    4.80
 -11  -3  -8    7.20    3.70
  11  -3   8   18.50    5.00
  11   3  -8   20.50    4.20
  11   3  -8   12.10    4.20
 -11  -3  -8   14.00    7.40
  11  -3  -8   17.70    4.60
  11  -3  -8   10.00    3.80
  11   3   8   10.60    3.60
  11  -3  -8    8.00    3.50
 -11   3  -8   13.10    4.90
 -11   3  -8   15.60    8.00
 -11   3   9   22.70    5.60
 -11  -3  -9   19.40    5.10
  11   3  -9    9.10    4.30
  11  -3   9   14.50    5.00
  11   3  -9   25.90    4.80
 -11  -3  -9   39.80    9.30
 -11   3  -9   20.50    5.80
  11  -3  -9   23.90    5.60
  11   3   9   22.00    4.80
 -11   3  -9   22.50    8.30
  11  -3  -9   18.40    5.10
 -11  -3 -10   13.60    5.00
  11   3 -10   16.90    4.50
  11  -3  10   12.70    4.80
 -11  -3 -10   23.50    7.10
  11   3 -10    1.70    3.80
 -11   3  10   26.50    5.90
  11   3  10   11.00    4.10
  11  -3 -10   11.30    4.90
  11  -3 -10   10.30    4.40
 -11   3 -10    4.30    5.10
 -11   3 -10   16.80    7.10
 -12  -3   0  199.28   13.60
 -12   3   0  197.88   15.70
  12  -3   0  201.58   15.10
  12   3   0  198.68   15.10
  12  -3   0  210.88   15.40
 -12  -3   0  193.08   19.50
  12   3   0  205.48   13.40
 -12   3   0  198.38   20.80
  12   3  -1   47.70    4.60
 -12  -3  -1   61.79   11.60
  12  -3   1   52.99    6.40
  12   3  -1   48.70    6.40
  12  -3   1   64.59    7.00
 -12   3   1   63.79   12.40
 -12   3   1   64.69    7.70
 -12  -3  -1   62.39    5.10
 -12   3  -1   45.30    7.20
  12  -3  -1   51.69    6.50
 -12   3  -1   87.89   14.20
  12   3   1   60.39    4.70
  12  -3  -1   49.50    6.60
  12   3   1   49.50    6.30
 -12  -3   1   56.39   11.10
 -12  -3   1   47.90    5.00
 -12   3   2   11.30    7.90
 -12   3   2    9.80    3.50
  12   3  -2    7.80    3.00
 -12  -3  -2    6.80    2.60
 -12  -3  -2    6.90    7.10
  12  -3   2    7.30    2.60
  12  -3   2    5.80    3.50
  12   3  -2    7.70    2.20
 -12  -3   2    5.70    5.50
  12   3   2    8.70    2.00
  12   3   2    8.60    2.90
 -12   3  -2   11.30    7.90
  12  -3  -2    8.50    3.80
 -12   3  -2    9.60    4.30
 -12  -3   2   10.10    2.10
  12  -3  -2    4.90    2.60
  12  -3   3   18.00    3.80
 -12  -3  -3   19.00    3.80
 -12   3   3   23.50    8.50
  12   3  -3   26.70    3.50
 -12  -3  -3   20.70    9.60
 -12   3   3   22.60    4.50
  12   3  -3   23.10    4.50
  12  -3   3   21.10    4.70
 -12   3  -3   24.10   10.20
 -12  -3   3   19.60    2.90
  12   3   3   29.00    3.50
  12  -3  -3   30.10    5.10
  12  -3  -3   33.00    5.30
  12  -3  -3   25.50    4.50
 -12  -3   3   23.00    7.80
  12   3   3   29.80    4.60
 -12   3  -3   26.10    5.20
 -12  -3  -4   -1.80    7.20
  12  -3   4    3.30    3.20
 -12   3   4    2.90    6.30
  12  -3   4    1.20    2.20
 -12   3   4    6.10    3.10
  12   3  -4    2.30    2.50
 -12  -3  -4    3.20    2.90
  12   3  -4    2.40    2.40
  12   3   4    2.50    1.90
 -12   3  -4   -2.20    3.20
 -12  -3   4    7.30    6.30
 -12  -3   4    3.60    1.80
  12  -3  -4    2.80    2.60
  12   3   4    4.50    2.80
  12  -3  -4    4.20    3.20
  12  -3  -4    2.20    3.40
 -12   3  -4    6.30    8.30
  12   3  -5   18.50    4.50
 -12   3   5   44.20   10.70
 -12  -3  -5   37.70   11.20
 -12  -3  -5   43.80    5.80
 -12   3   5   34.40    5.90
 -12   3   5   44.00    6.30
  12  -3   5   42.70    6.00
 -12   3  -5   30.90    5.90
  12  -3  -5   38.90    5.80
  12  -3  -5   28.30    5.20
 -12  -3   5   28.50    4.30
  12  -3  -5   51.99    6.30
  12   3   5   39.90    4.70
 -12   3  -5   38.70   11.70
 -12  -3  -6   65.39    7.60
  12   3  -6   59.39    6.30
 -12   3   6   64.59    8.40
 -12  -3  -6   71.79   14.10
  12  -3   6   48.80    7.40
  12   3  -6   57.89    8.00
 -12   3   6   71.79   12.70
 -12  -3   6   64.29    6.30
  12  -3  -6   69.69    8.20
  12   3   6   63.49    6.40
 -12   3  -6   65.99    8.80
 -12   3  -6   68.49   13.60
  12  -3  -6   60.59    7.70
  12  -3  -6   66.69    8.30
 -12   3   7    4.90    3.10
 -12  -3  -7   -1.00    3.30
  12  -3   7   -1.00    3.10
 -12  -3  -7   -0.60    6.70
  12   3  -7    4.80    2.80
  12   3  -7    1.30    3.20
 -12   3  -7   -6.10    3.10
  12   3   7    0.80    2.30
  12  -3  -7   -1.50    2.40
  12  -3  -7   -0.10    3.30
 -12   3  -7    2.10    7.10
  12  -3  -7    0.70    3.30
  12   3  -8   27.10    5.70
 -12  -3  -8   33.70    9.80
  12  -3   8   26.60    5.70
 -12   3   8   34.50    6.50
 -12  -3  -8   31.30    6.00
  12   3  -8   31.40    5.10
 -12   3  -8   27.60   10.30
 -12   3  -8   26.60    6.20
  12  -3  -8   40.40    6.50
  12  -3  -8   31.10    5.90
  12   3   8   40.60    5.60
 -12   3   9   13.40    4.80
  12  -3   9   15.20    5.00
  12   3  -9    3.80    4.20
 -12  -3  -9   14.20    7.30
 -12  -3  -9    0.30    3.70
  12   3  -9   11.20    3.80
  12  -3  -9    4.80    4.10
  12  -3  -9    7.00    4.30
  12   3   9    8.20    3.40
 -12   3  -9    0.70    4.30
 -12   3  -9    6.70    6.20
 -12   3  10   15.80    5.30
  12  -3  10   12.80    5.60
  12   3 -10   14.70    5.20
 -12  -3 -10   12.50    5.10
  12   3 -10   25.30    5.20
 -12  -3 -10   34.60    8.20
  12  -3 -10   21.50    5.50
 -12   3 -10   23.00    6.00
  12  -3 -10   13.50    5.10
  12   3  10   19.30    5.10
 -12   3 -10   38.70    9.50
 -13   3   0  105.49   10.40
  13   3   0  118.79   10.00
 -13   3   0  126.59   16.90
 -13  -3   0  101.79   16.00
  13  -3   0  121.29   10.40
  13  -3   0  113.79    9.90
 -13  -3  -1   56.59   11.90
 -13   3   1   53.99    7.40
  13   3  -1   46.60    6.30
  13  -3   1   44.20    6.30
 -13   3   1   68.29   13.70
  13  -3   1   62.49    7.00
  13  -3  -1   58.59    6.90
 -13   3  -1   45.50    7.00
  13   3   1   47.10    6.40
  13  -3  -1   46.70    6.60
 -13  -3   1   42.50   11.00
 -13   3  -1   30.50   11.30
  13  -3   2    5.80    3.00
 -13   3   2   13.30    3.90
 -13   3   2    9.30    7.50
  13   3  -2    6.10    3.10
 -13  -3  -2    5.60    7.00
  13  -3   2    8.40    3.70
  13   3   2   10.70    2.20
 -13   3  -2    3.30    3.60
  13  -3  -2    8.40    3.90
  13  -3  -2    5.50    3.10
 -13  -3   2   11.40    7.40
 -13   3  -2   -0.10    8.00
  13   3   2    6.40    3.00
  13  -3   3   19.70    4.20
  13  -3   3   31.00    5.30
 -13   3   3   26.50    9.60
 -13  -3  -3   22.30    4.10
 -13   3   3   21.50    4.70
 -13  -3  -3   10.80    9.10
  13   3  -3   17.80    4.30
  13   3   3   17.00    4.10
 -13  -3   3   19.10    7.80
 -13   3  -3   29.90    5.80
  13   3   3   22.30    3.20
 -13   3  -3   29.40   11.60
  13  -3  -3   23.40    4.80
  13  -3  -3   19.50    4.80
  13  -3   4   10.20    3.10
  13   3  -4    4.10    3.10
 -13  -3  -4    9.90    3.40
  13  -3   4    4.30    3.30
 -13  -3  -4    4.30    8.70
 -13   3   4    7.00    3.40
 -13   3   4    7.00    7.60
  13   3   4    9.90    3.40
  13   3   4    6.70    2.30
  13  -3  -4    2.70    2.90
 -13   3  -4    3.80    3.90
 -13  -3   4   12.30    6.80
  13  -3  -4    5.90    3.70
 -13   3  -4    2.80    7.80
 -13   3   5    6.20    7.30
 -13  -3  -5    3.70    8.40
  13  -3   5    8.80    3.80
 -13   3   5   11.70    3.60
 -13   3   5   19.50    5.00
 -13  -3  -5    4.60    3.30
  13   3  -5    3.40    3.20
  13  -3  -5   10.20    4.20
  13  -3  -5   10.00    3.70
 -13   3  -5   13.20    4.80
  13   3   5   11.00    2.80
 -13  -3   5   12.00    6.30
 -13   3  -5    1.60    9.30
 -13  -3  -6   16.40    4.40
 -13  -3  -6   29.80   10.80
  13   3  -6   20.40    4.90
 -13   3   6   22.00    9.20
 -13   3   6   22.50    5.00
  13   3  -6   20.10    3.90
  13  -3   6   17.10    4.80
  13   3   6   17.70    3.70
  13  -3  -6   15.50    4.70
 -13   3  -6   27.00   10.50
  13  -3  -6    9.90    4.00
 -13   3  -6   25.10    5.60
  13  -3   7   -1.90    3.50
 -13  -3  -7    0.70    3.40
 -13   3   7   11.70    7.60
  13   3  -7    6.90    3.10
  13   3  -7    0.70    3.60
 -13   3   7    8.00    3.80
 -13  -3  -7   13.10    8.20
  13   3   7    6.70    2.90
  13  -3  -7   -0.30    3.70
 -13   3  -7    0.80    4.10
  13  -3  -7    3.90    4.00
 -13   3  -7    6.10    7.60
 -13  -3  -8   13.70    8.80
  13  -3   8   27.60    6.10
 -13   3   8   26.40    5.80
  13   3  -8   11.30    4.70
 -13  -3  -8   13.50    4.90
  13   3  -8   19.60    4.30
 -13   3   8   37.70    9.70
  13  -3  -8   16.00    5.10
  13   3   8   24.40    4.80
 -13   3  -8   29.30    6.60
 -13   3  -8   17.50    9.40
  13  -3  -8   13.50    4.90
  13  -3   9   24.10    6.20
 -13   3   9   22.60    5.80
  13   3  -9   23.60    4.90
  13   3  -9   21.20    5.50
 -13  -3  -9   16.30    5.60
 -13  -3  -9   24.20    9.20
  13  -3  -9   25.70    6.10
 -13   3  -9   24.00    6.40
 -13   3  -9   26.60   10.30
  13  -3  -9   20.50    5.90
  13   3   9   13.40    4.10
  14  -3   0  110.49   10.70
  14   3   0  122.89   10.90
 -14   3   0  106.39   17.50
 -14   3   0  134.29   11.40
  14  -3   0  119.29   10.60
 -14  -3   0  130.89   17.20
 -14  -3  -1   35.80   10.80
  14  -3   1   32.80    5.60
  14   3  -1   26.50    5.10
  14  -3   1   49.00    6.60
 -14   3   1   39.80   12.40
 -14   3   1   38.40    6.20
  14   3   1   29.30    5.20
 -14  -3   1   42.20   10.90
  14  -3  -1   35.00    5.60
  14  -3  -1   38.30    6.20
 -14   3  -1   44.70   12.50
 -14   3  -1   42.10    6.50
 -14   3   2   48.90    6.80
  14  -3   2   41.30    5.90
 -14   3   2   39.10   12.10
  14  -3   2   45.80    6.60
 -14  -3  -2   33.90   11.50
  14   3  -2   37.50    6.00
 -14   3  -2   47.00    7.00
 -14  -3   2   39.90   10.90
  14  -3  -2   57.69    6.90
  14  -3  -2   36.70    5.80
  14   3   2   38.80    5.90
 -14   3  -2   55.69   13.50
  14  -3   3   67.19    7.90
 -14   3   3   52.39    7.60
 -14  -3  -3   58.29   14.00
 -14   3   3   71.09   14.40
  14   3  -3   67.19    8.10
  14  -3   3   58.49    7.20
  14  -3  -3   62.19    7.70
 -14   3  -3   66.39    8.60
 -14  -3   3   54.89   11.80
  14   3   3   60.19    7.30
 -14   3  -3   69.19   15.10
  14  -3  -3   55.09    7.80
 -14   3   4    0.90    2.80
  14  -3   4    6.40    3.00
 -14   3   4   -0.80    7.50
  14   3  -4    2.90    3.10
  14  -3   4    9.50    3.90
 -14  -3  -4   -5.80    7.00
  14  -3  -4    0.40    3.30
 -14   3  -4    3.80    8.60
 -14   3  -4    2.40    3.90
  14   3   4    2.70    3.10
  14  -3  -4    8.30    4.10
 -14  -3   4   12.60    7.80
 -14   3   5   30.90   10.30
  14  -3   5   46.70    6.90
 -14  -3  -5   42.00   12.30
 -14   3   5   42.90    6.80
 -14  -3  -5   39.20    6.10
  14   3  -5   41.60    7.00
 -14   3  -5   52.89    7.80
  14  -3  -5   51.09    7.50
  14   3   5   35.60    4.80
 -14   3  -5   30.20   12.10
  14  -3  -5   40.80    6.80
 -14  -3   5   41.20   11.00
 -14  -3  -6    6.90    3.80
 -14   3   6    8.10    3.80
 -14  -3  -6    9.10    9.70
 -14   3   6   13.90    8.00
  14   3  -6    6.20    3.80
  14  -3   6    9.80    4.40
  14  -3  -6    6.60    4.10
  14  -3  -6    5.30    3.80
 -14  -3   6   15.40    7.60
  14   3   6    6.10    2.80
 -14   3  -6   17.80   11.20
 -14   3  -6   21.30    5.60
 -14   3   7   17.60    9.20
  14  -3   7   10.00    4.60
 -14  -3  -7   12.60    4.40
 -14  -3  -7    1.70    8.00
  14   3  -7    3.30    3.80
 -14   3   7    4.30    3.70
 -14   3  -7    5.00    8.60
 -14   3  -7   12.10    5.20
  14   3   7   15.10    3.70
  14  -3  -7   -2.00    3.70
  14  -3  -7    2.10    3.90
 -14  -3  -8    8.60    4.60
 -14   3   8   12.40    4.60
  14   3  -8    8.00    4.50
  14  -3   8    8.20    4.40
 -14   3   8   33.80   10.90
 -14  -3  -8   19.00   10.00
 -14   3  -8   11.40    9.00
  14   3   8   16.20    4.20
  14  -3  -8   13.70    5.20
 -14   3  -8   18.40    5.70
  14  -3  -8   19.50    5.60
  15  -3   0   -0.50    2.60
 -15  -3   0    5.10    7.90
  15   3   0   -0.30    3.10
 -15   3   0    5.20    3.80
 -15   3   0    5.90    9.60
  15  -3   0   -3.10    3.50
 -15   3   1   56.09    7.80
  15  -3   1   74.09    8.20
 -15  -3  -1   63.09   13.90
  15   3  -1   71.99    8.30
 -15   3   1   63.29   14.90
  15  -3   1   63.29    8.00
  15   3   1   45.70    7.20
  15  -3  -1   45.80    7.10
 -15   3  -1   72.49   16.70
 -15   3  -1   66.89    8.50
 -15  -3   1   60.59   12.90
  15  -3  -1   58.69    7.70
 -15  -3  -2    0.70    8.20
  15  -3   2    7.10    3.30
 -15   3   2    3.30    9.20
  15   3  -2    4.20    3.30
  15  -3   2    8.90    4.10
 -15   3   2    9.50    3.70
  15   3   2    8.10    3.90
 -15   3  -2   14.60   11.40
 -15   3  -2   16.70    5.00
 -15  -3   2    1.90    7.10
  15  -3  -2    7.60    4.20
  15  -3  -2    5.80    3.40
 -15  -3  -3    4.20    9.60
  15   3  -3    6.10    3.80
 -15   3   3   12.50   10.10
 -15   3   3   10.70    4.00
  15  -3   3    6.80    3.30
  15  -3   3    5.10    3.90
 -15   3  -3    7.20    9.70
 -15  -3   3   10.60    8.70
 -15   3  -3   10.30    4.70
  15   3   3   10.80    4.10
  15  -3  -3    2.30    3.70
  15  -3  -3    9.40    4.50
 -15   3   4    8.60    9.80
 -15  -3  -4   12.00   10.50
 -15   3   4   12.70    4.10
  15  -3   4   16.70    4.70
  15   3  -4   12.00    4.80
  15  -3  -4    3.70    3.70
 -15  -3   4   23.00    9.40
  15  -3  -4   15.50    5.00
 -15   3  -4   16.70    5.10
 -15   3  -4    8.90   11.00
 -15   3   5   14.10    4.20
 -15  -3  -5    1.10    9.20
  15   3  -5    9.90    4.50
  15  -3   5    7.50    4.40
 -15   3   5   12.90    9.60
  15  -3  -5    5.50    4.20
  15  -3  -5    5.90    4.40
 -15   3  -5    2.50    4.10
 -15   3  -5    5.20   10.70
 -15  -3   5   10.10    8.30
 -15  -3  -6    0.60    8.60
 -15   3   6   11.20    4.10
 -15   3   6    8.30    9.10
  15  -3   6    4.50    4.30
  15   3  -6    1.60    4.10
  15  -3  -6    3.20    4.40
 -15  -3   6   13.30    8.70
 -15   3  -6    4.70    4.90
  15  -3  -6    0.90    4.10
 -15   3  -6    8.60    9.30
  16  -3   0    2.20    3.40
 -16  -3   0    0.40    8.30
  16   3   0    2.30    3.70
  16  -3   0   -2.40    3.70
 -16   3   0   -5.30    9.70
 -16   3   0    8.70    3.70
 -16   3   1   18.80   12.20
  16  -3   1   20.80    5.40
 -16  -3  -1   26.50   11.70
  16  -3   1   16.20    5.00
  16   3  -1   17.30    4.90
  16  -3  -1   21.80    5.50
 -16  -3   1   23.20   11.20
  16  -3  -1   16.70    4.80
 -16   3  -1   30.60   14.50
  16   3   1   23.40    5.60
 -16   3  -1   30.20    5.70
  16   3  -2   -3.30    3.00
 -16   3   2   12.30   11.20
 -16   3   2    8.20    3.50
 -16  -3  -2    1.60    9.60
  16  -3   2    5.10    3.70
  16  -3   2    1.00    3.70
  16  -3  -2   13.50    4.70
 -16  -3   2    2.50    8.10
  16  -3  -2    2.80    3.50
 -16   3  -2    1.60    3.80
  16   3   2    7.30    4.20
 -16   3  -2    2.20   11.70
  16  -3   3   -0.50    3.00
  16  -3   3   -1.00    3.50
 -16   3   3    6.10    3.00
 -16  -3  -3  -12.00    7.70
  16   3  -3   -0.40    3.90
 -16   3   3   -5.70    7.70
  16   3   3   -2.60    3.30
  16  -3  -3   -0.90    4.10
 -16   3  -3    8.30   10.10
  16  -3  -3    1.00    3.30
 -16  -3   3   -4.80    8.00
 -16   3   4    6.20    3.10
 -16  -3  -4   -6.70    8.30
  16   3  -4    1.00    4.20
 -16   3   4   -6.20    9.30
  16  -3   4   -0.10    3.50
 -16   3  -4    1.20   10.60
 -16  -3   4    2.60    8.40
 -16   3  -4    7.90    4.40
  16  -3  -4    0.90    3.50
  16  -3  -4    0.80    4.00
  16   3  -5    8.20    4.50
  16  -3   5    9.90    4.60
 -16   3   5    5.30    3.40
 -16  -3  -5    4.10   10.40
 -16   3   5   13.70   11.30
 -16   3  -5   11.80    5.00
 -16   3  -5   13.60   12.00
 -16  -3   5   12.40    9.20
  16  -3  -5   11.10    4.90
  16  -3  -5    5.60    4.90
  17  -3   0    4.70    3.90
 -17   3   0   -1.30   12.20
 -17  -3   0   15.70   11.10
  17   3   0   -1.40    4.10
  17  -3   0    7.10    4.60
 -17   3   0   17.80    4.60
 -17   3   1   57.49    7.40
  17   3  -1   45.00    7.50
 -17  -3  -1   33.70   13.40
  17  -3   1   42.60    7.10
  17  -3   1   54.99    8.10
 -17   3   1   42.40   14.70
  17  -3  -1   51.09    7.70
 -17   3  -1   69.89   19.60
  17   3   1   64.69    8.60
 -17  -3   1   22.90   11.30
  17  -3  -1   49.00    7.40
 -17   3  -1   54.89    8.00
  17  -3   2   31.80    6.00
 -17   3   2   27.50    5.30
 -17  -3  -2    8.20   11.20
  17  -3   2   21.10    5.40
 -17   3   2   27.60   12.70
  17   3  -2   24.80    6.00
 -17  -3   2   36.40   12.90
 -17   3  -2   26.90   15.50
  17   3   2   21.70    5.60
  17  -3  -2   16.10    5.40
  17  -3  -2    9.60    5.20
 -17   3  -2   30.10    5.90
   0   4   0 2827.22  175.38
   0  -4   0 2869.41  175.38
   0   4   0 2916.81  175.48
   0   4   0 2730.53  176.08
   0  -4   0 2823.02  175.28
   0   4   0 2823.92  175.28
   0   4  -1  675.73   41.70
   0  -4   1  665.53   41.70
   0  -4   1  679.73   41.80
   0  -4  -1  626.44   41.70
   0   4   1  628.04   41.60
   0   4  -1  685.23   42.20
   0  -4  -1  636.24   41.70
   0   4   1  645.44   41.80
   0   4  -1  664.23   41.60
   0   4  -1  689.63   41.60
   0   4   1  683.93   41.90
   0   4  -1  687.83   41.80
   0   4  -2  336.27   21.10
   0   4   2  351.16   21.50
   0   4   2  352.26   21.80
   0   4  -2  325.87   22.40
   0   4  -2  319.97   21.60
   0  -4   2  315.87   21.50
   0   4  -2  314.57   21.40
   0   4   2  350.46   21.70
   0  -4  -2  346.67   21.60
   0  -4  -2  355.96   21.60
   0   4  -2  319.77   21.20
   0  -4  -3  619.84   39.00
   0   4  -3  638.24   40.50
   0  -4   3  619.34   38.90
   0   4   3  605.54   38.90
   0  -4  -3  593.44   39.10
   0   4  -3  612.44   38.90
   0  -4  -3  574.54   39.00
   0   4  -3  638.64   38.30
   0   4  -3  629.74   39.10
   0   4   4   93.79    7.40
   0  -4  -4   99.59    7.60
   0  -4  -4  101.79    8.00
   0   4  -4  130.59    9.70
   0  -4  -4   90.69    7.50
   0   4   4   98.19    7.70
   0  -4  -5   58.99    5.50
   0   4  -5   61.99    5.60
   0  -4  -5   64.29    6.20
   0  -4   5   67.29    5.60
   0   4  -5   64.99    7.10
   0   4   5   58.79    5.50
   0   4   5   63.99    5.90
   0   4  -5   70.89    5.50
   0  -4  -5   65.39    5.70
   0  -4  -6   41.00    5.00
   0   4  -6   43.00    4.20
   0   4   6   39.60    4.60
   0   4  -6   48.60    6.40
   0  -4   6   47.40    4.40
   0  -4  -6   31.50    4.40
   0  -4  -6   38.40    5.10
   0   4   6   28.20    4.30
   0   4  -6   47.70    5.30
   0   4  -7   17.10    5.10
   0  -4  -7   13.60    3.10
   0  -4   7   20.30    3.50
   0   4   7   20.40    3.70
   0   4   7   19.80    3.60
   0   4  -7   20.00    3.50
   0  -4  -7   21.50    3.60
   0  -4  -7   24.60    4.80
   0   4  -7   13.90    3.20
   0   4   8    8.60    3.30
   0   4  -8    4.80    3.60
   0   4   8    7.10    2.60
   0   4  -8    7.60    3.10
   0   4  -8    4.70    2.20
   0  -4   8    8.50    2.60
   0  -4  -8    4.00    2.10
   0  -4  -8    7.80    3.40
   0  -4  -8    6.40    2.90
   0  -4   9   11.20    3.20
   0  -4  -9   13.10    3.40
   0  -4  -9   15.40    3.70
   0   4  -9   11.60    3.20
   0   4  -9   13.40    5.20
   0   4  -9   19.10    4.10
   0   4   9   13.80    3.60
   0  -4  -9    8.10    3.60
   0  -4 -10   85.29    9.40
   0   4  10   80.99    8.10
   0   4 -10   67.79    8.70
   0   4 -10   82.39   11.10
   0   4  10   77.79    7.90
   0  -4  10   76.59    8.00
   0  -4 -10   76.59    9.70
   0   4 -10   70.69    7.60
   0  -4 -10   83.39    8.50
   0  -4 -11   19.60    5.00
   0  -4 -11   16.40    5.60
   0   4 -11   10.20    3.40
   0   4 -11   12.00    4.40
   0   4  11   23.30    4.80
   0   4 -11   19.70    6.90
   0  -4  11   22.90    5.00
   0  -4 -11   17.50    4.10
   0   4  12    7.70    3.20
   0  -4 -12    9.20    4.40
   0  -4 -12    5.20    3.10
   0  -4  12    5.60    3.40
   0  -4 -12    5.50    3.70
   0   4 -12    8.00    5.80
   0   4 -12    4.80    3.00
   0   4 -12    7.30    4.20
   0  -4  13    8.20    3.60
   0   4 -13    2.90    3.60
   0  -4 -13    3.70    3.10
   0   4  13    1.60    3.50
   0   4 -13    0.20    4.10
   0  -4 -13    4.30    3.30
   0   4 -13    4.20    4.20
   0  -4 -13   -2.10    2.80
  -1   4   0  136.59    9.50
  -1   4   0  125.69    9.50
   1   4   0  166.58    9.40
   1   4   0  126.99    9.10
  -1   4   0  147.19    9.70
   1  -4   0  128.09    9.40
   1   4   0  149.99    9.30
  -1  -4   0  126.89    9.10
   1  -4   0  128.19    9.40
  -1  -4   0  136.99    9.10
  -1   4   0  142.29    9.40
   1   4   0  130.99    9.20
   1  -4   1   64.29    5.00
  -1  -4  -1   54.79    4.20
  -1   4   1   54.89    4.60
   1  -4   1   62.49    5.00
   1   4  -1   66.99    4.40
  -1  -4  -1   53.39    4.40
   1   4  -1   68.29    5.10
   1   4  -1   66.89    4.60
  -1   4   1   56.39    4.60
  -1   4   1   61.49    4.80
  -1  -4  -1   54.69    4.40
   1   4  -1   62.09    4.50
  -1   4   1   57.69    4.90
   1   4  -1   68.69    4.40
  -1  -4   1   63.49    4.40
   1  -4  -1   49.60    4.80
  -1   4  -1   68.39    5.20
   1  -4  -1   57.59    4.70
   1   4   1   52.79    4.40
  -1   4  -1   70.99    4.70
  -1   4  -1   69.69    5.40
  -1  -4   1   57.89    4.60
   1   4   1   59.39    4.70
   1   4   1   52.89    4.40
  -1   4  -1   55.29    4.70
   1   4  -2   98.99    6.30
   1   4  -2   92.09    6.40
  -1   4   2   88.69    6.70
   1  -4   2   93.89    6.90
  -1  -4  -2   90.59    6.60
  -1  -4  -2   88.59    6.60
   1   4  -2   90.89    6.50
   1   4  -2   99.39    6.70
  -1   4   2   95.39    7.10
   1   4  -2  103.39    7.70
  -1   4   2   87.69    6.80
  -1  -4  -2   89.39    6.40
   1  -4  -2   96.89    7.00
   1   4   2   89.79    6.70
  -1  -4   2   97.19    6.50
   1  -4  -2   86.29    6.80
  -1   4  -2   96.79    7.00
  -1   4  -2   91.49    6.80
   1   4   2   93.99    6.80
   1   4   2   90.99    6.60
  -1   4  -2   90.39    7.70
  -1   4   3  709.83   44.70
  -1  -4  -3  718.73   44.80
  -1   4   3  708.93   44.70
   1   4  -3  705.83   44.00
  -1   4   3  717.33   45.10
   1   4  -3  673.63   46.00
   1   4  -3  691.53   44.50
  -1  -4  -3  704.23   44.60
  -1  -4  -3  736.83   44.70
   1   4  -3  685.83   44.60
   1  -4   3  692.73   44.70
  -1   4  -3  705.93   44.90
   1  -4  -3  729.73   44.80
  -1   4  -3  686.63   46.10
   1   4   3  705.53   44.80
   1   4   3  717.83   44.80
   1  -4  -3  727.03   44.90
   1   4   3  725.33   44.60
  -1  -4   3  691.13   44.40
  -1   4  -3  702.83   44.70
  -1   4   4   44.00    4.50
  -1  -4  -4   49.50    4.40
  -1  -4  -4   44.30    4.60
   1   4  -4   54.19    4.50
   1   4  -4   55.39    3.40
   1  -4   4   47.20    3.40
   1   4  -4   48.70    5.70
  -1   4   4   50.49    4.60
   1   4  -4   54.29    4.30
  -1  -4  -4   47.50    4.30
   1  -4   4   55.69    4.60
  -1   4  -4   50.59    4.40
   1   4   4   49.70    4.30
  -1  -4   4   50.69    4.30
   1   4   4   41.90    4.10
   1   4   4   46.30    4.50
   1  -4  -4   54.39    4.70
  -1   4  -4   49.99    4.70
  -1   4  -4   49.50    5.80
   1  -4  -4   43.20    4.70
   1  -4  -4   37.60    4.20
   1   4  -5  115.39    8.90
   1   4  -5  122.19   11.00
  -1   4   5  130.89    9.60
   1  -4   5  123.19    9.20
  -1   4   5  117.29    9.10
  -1  -4  -5  118.59    9.10
   1   4  -5  113.79    9.10
  -1  -4  -5  125.79    9.30
  -1  -4  -5  118.59    9.80
   1  -4  -5  124.99    9.30
  -1  -4   5  117.59    8.90
  -1   4  -5  129.89   11.30
   1  -4  -5  123.29   10.00
   1   4   5  136.49    9.10
   1   4   5  128.99    9.40
  -1   4  -5  130.79    9.50
   1  -4  -5  111.59    9.30
  -1   4  -5  121.39    9.20
   1   4   5  124.89    9.10
   1   4  -6  202.38   16.60
  -1  -4  -6  196.88   15.10
  -1  -4  -6  191.98   14.10
   1   4  -6  198.68   14.00
   1   4  -6  198.38   14.10
  -1   4   6  203.18   14.10
   1  -4   6  209.18   14.20
  -1   4   6  197.38   14.50
  -1  -4  -6  186.48   14.10
  -1   4  -6  189.38   16.30
  -1   4  -6  199.68   14.30
   1   4   6  196.08   14.40
   1  -4  -6  199.88   14.30
  -1   4  -6  206.78   14.20
   1  -4  -6  194.68   14.20
   1   4   6  200.78   13.80
   1   4   6  185.48   13.90
   1  -4  -6  212.38   15.50
  -1  -4   6  194.98   13.80
  -1  -4  -7   33.20    4.90
   1   4  -7   42.00    5.00
  -1  -4  -7   43.10    6.60
  -1   4   7   43.70    5.50
  -1   4   7   37.40    4.90
  -1  -4  -7   37.60    4.90
   1   4  -7   34.40    4.80
   1   4  -7   39.60    7.20
   1  -4   7   48.80    5.50
   1   4   7   37.00    5.10
   1   4   7   36.60    4.80
  -1  -4   7   50.09    5.40
   1  -4  -7   32.60    4.60
   1  -4  -7   36.80    5.00
  -1   4  -7   38.60    5.00
   1  -4  -7   33.60    5.90
   1   4   7   34.90    4.40
  -1   4  -7   43.60    5.70
   1   4  -8   51.49    9.20
  -1   4   8   63.49    6.20
  -1  -4  -8   42.00    5.60
   1   4  -8   44.30    6.00
   1   4  -8   35.30    5.30
   1  -4   8   51.39    6.20
  -1  -4  -8   63.19    6.20
  -1  -4  -8   59.19    7.20
  -1   4   8   48.00    6.30
  -1   4  -8   54.69    6.70
  -1   4  -8   36.80    7.70
   1   4   8   56.79    5.60
  -1  -4   8   51.39    6.00
   1  -4  -8   48.20    6.00
   1  -4  -8   47.70    4.20
   1   4   8   52.49    5.10
   1  -4  -8   59.19    7.20
  -1   4  -8   45.60    6.00
   1   4  -9   69.49    7.80
  -1  -4  -9   85.59    8.00
  -1  -4  -9   82.59    9.60
  -1   4   9   86.69    8.10
  -1   4   9   80.59    8.50
   1   4  -9   86.29   10.80
   1   4  -9   78.29    7.80
   1  -4   9   77.09    7.80
  -1  -4  -9   95.39    8.50
   1   4   9   77.09    7.60
   1  -4  -9   94.49    8.40
   1  -4  -9   96.79    8.60
   1  -4  -9   82.99    9.60
  -1  -4   9   83.59    8.00
  -1   4  -9   76.09   10.40
   1   4   9   87.19    7.30
  -1   4  -9   82.79    8.50
  -1   4  -9   81.89    8.00
  -1   4  10   25.80    4.80
  -1  -4 -10   31.70    5.60
  -1  -4 -10   35.30    6.10
   1   4 -10   54.99   10.40
   1  -4  10   45.40    6.30
   1   4 -10   37.80    5.60
  -1  -4 -10   38.80    7.60
   1   4 -10   46.40    6.70
   1   4  10   31.50    5.20
   1  -4 -10   29.60    6.90
  -1   4 -10   47.60    6.60
   1  -4 -10   25.90    5.00
  -1   4 -10   48.10    9.60
  -1   4 -10   44.00    6.30
   1  -4 -10   33.00    5.70
  -1  -4  10   42.10    6.00
   1   4 -11    7.40    3.70
  -1   4  11    4.30    3.10
  -1  -4 -11    9.30    3.80
   1  -4  11    4.30    3.10
  -1  -4 -11    3.70    2.80
   1   4 -11    4.20    4.00
   1   4 -11   10.00    3.30
  -1  -4 -11    2.90    3.50
   1  -4 -11    7.50    3.70
  -1   4 -11    6.50    4.80
  -1   4 -11    5.80    3.00
  -1  -4  11    3.00    2.70
  -1   4 -11    3.10    3.40
   1  -4 -11    5.60    4.10
   1  -4 -11    8.80    3.20
   1   4  11    9.90    3.70
   1  -4  12   11.50    4.00
  -1  -4 -12    2.40    3.70
  -1   4  12    5.80    3.60
   1   4 -12    8.30    5.60
  -1  -4 -12    9.30    4.70
  -1  -4 -12   14.30    4.30
   1   4 -12    7.10    4.40
   1   4 -12    6.90    3.50
   1  -4 -12   12.80    4.10
  -1   4 -12    5.40    3.00
   1   4  12    6.80    3.50
   1  -4 -12    9.40    5.10
  -1   4 -12   10.20    5.80
  -1  -4  12   11.70    4.00
   1  -4 -12    8.20    4.40
  -1   4 -12    5.80    4.40
   1   4 -13   -0.30    3.90
  -1  -4 -13   11.90    4.80
   1   4 -13    9.90    5.60
  -1  -4 -13    0.90    2.70
   1   4 -13    3.90    3.20
  -1  -4 -13    7.70    4.70
  -1   4  13    6.70    4.00
   1  -4  13    4.30    3.60
  -1  -4  13    4.30    3.30
   1  -4 -13   10.80    4.20
  -1   4 -13    9.40    5.30
   1   4  13    6.50    3.50
  -1   4 -13   -1.30    3.80
   1  -4 -13   11.10    4.70
  -1   4 -13    3.60    3.00
  -2  -4   0  258.17   16.00
  -2   4   0  255.07   16.90
  -2  -4   0  252.17   16.00
   2   4   0  253.77   16.00
   2   4   0  253.27   16.00
  -2   4   0  257.87   16.70
  -2   4   0  246.68   16.60
   2   4   0  252.07   16.50
  -2   4   0  257.87   17.40
   2  -4   0  236.68   16.70
   2  -4   0  255.77   16.70
   2   4  -1  152.48   10.20
  -2   4   1  153.78   10.80
  -2   4   1  156.88   10.80
  -2  -4  -1  154.88    9.90
  -2  -4  -1  168.58   10.50
   2  -4   1  145.39   10.50
  -2  -4  -1  161.18    9.90
  -2   4   1  155.98   10.50
  -2   4   1  148.09   10.40
   2  -4   1  138.59   10.60
   2   4  -1  154.68   10.30
   2   4  -1  145.19    9.80
  -2   4  -1  143.69   11.50
   2   4   1  159.88    9.90
  -2  -4   1  144.79    9.80
   2   4   1  152.48   10.40
  -2  -4   1  147.99    9.90
   2  -4  -1  156.78   10.50
  -2   4  -1  135.49   10.40
   2   4   1  157.88   10.00
  -2   4  -1  143.29   10.70
   2  -4  -1  149.79   10.60
  -2  -4  -2  183.18   13.20
  -2   4   2  181.58   12.80
  -2   4   2  179.08   12.90
   2   4  -2  188.58   12.60
  -2  -4  -2  171.78   12.50
   2   4  -2  209.18   12.40
  -2  -4  -2  183.18   12.50
   2   4  -2  207.78   12.50
  -2   4   2  185.28   13.20
   2   4  -2  197.08   13.90
   2  -4   2  216.88   13.10
   2  -4   2  194.58   13.20
  -2   4  -2  203.28   14.30
  -2  -4   2  199.38   12.40
   2   4   2  182.08   12.40
   2   4   2  172.78   12.80
  -2   4  -2  203.18   13.00
   2   4   2  174.28   12.50
  -2   4  -2  210.48   13.20
   2  -4  -2  183.88   13.00
   2   4  -3   59.89    4.30
  -2  -4  -3   50.49    4.30
   2  -4   3   66.59    5.00
  -2  -4  -3   43.70    4.80
   2   4  -3   52.99    4.30
   2   4  -3   54.79    5.60
   2   4  -3   60.89    4.20
  -2  -4  -3   48.20    4.20
   2  -4   3   61.69    4.00
  -2   4   3   49.40    4.50
  -2   4   3   47.60    4.80
  -2   4   3   41.90    4.40
  -2   4  -3   58.19    6.10
   2   4   3   49.00    4.30
  -2   4  -3   62.79    4.80
  -2  -4   3   62.79    4.20
   2  -4  -3   42.10    4.40
   2   4   3   47.80    4.40
   2  -4  -3   52.29    4.70
   2   4   3   45.60    4.10
  -2   4  -3   54.69    4.80
  -2   4   4    6.80    2.00
  -2  -4  -4   10.50    1.90
   2  -4   4   13.40    2.50
   2   4  -4    8.40    2.90
  -2   4   4   10.80    2.00
   2   4  -4   11.20    1.80
  -2   4   4    5.60    2.00
  -2  -4  -4    9.80    2.00
   2   4  -4    7.90    1.60
  -2  -4  -4    9.50    2.30
   2   4  -4   10.70    2.00
   2  -4   4    9.00    1.30
   2   4   4    9.70    1.80
  -2  -4   4    8.50    1.70
  -2   4  -4    5.50    2.70
  -2   4  -4   10.50    2.10
   2  -4  -4    8.70    2.10
   2   4   4   11.80    2.20
  -2   4  -4    9.20    2.30
   2   4   4    6.90    1.80
   2  -4  -4    9.30    2.10
   2   4  -5   37.70    3.80
   2   4  -5   46.90    7.00
   2   4  -5   41.50    3.60
   2   4  -5   36.20    4.00
  -2   4   5   45.20    4.50
  -2  -4  -5   38.80    4.10
   2  -4   5   35.80    4.30
  -2  -4  -5   37.90    4.00
  -2   4   5   37.40    4.70
  -2  -4  -5   36.60    4.60
  -2   4  -5   35.60    6.00
  -2   4  -5   42.50    4.20
   2  -4  -5   43.80    4.30
   2   4   5   39.20    4.00
  -2  -4   5   39.50    3.80
   2   4   5   40.20    4.00
   2  -4  -5   44.00    4.40
   2   4   5   40.70    4.20
  -2   4  -5   45.30    5.10
   2   4  -6   21.10    5.00
  -2   4   6   33.00    4.10
  -2   4   6   35.80    4.60
   2   4  -6   30.50    3.10
  -2  -4  -6   39.20    4.40
  -2  -4  -6   39.40    4.00
   2  -4   6   24.20    3.90
  -2  -4  -6   30.60    5.10
   2   4  -6   28.00    4.00
   2   4  -6   20.70    3.40
   2  -4  -6   33.40    4.30
   2   4   6   44.20    4.30
  -2   4  -6   26.80    4.10
  -2   4  -6   21.60    5.10
   2   4   6   40.30    4.40
   2  -4  -6   29.80    4.10
  -2  -4   6   21.50    3.30
   2   4   6   34.50    3.60
  -2   4  -6   27.70    4.00
  -2  -4  -7   76.99    7.80
   2   4  -7   70.79    6.80
  -2   4   7   75.89    6.90
   2  -4   7   68.79    6.70
  -2  -4  -7   76.69    6.80
   2   4  -7   67.89    8.80
  -2   4   7   74.59    7.20
   2   4  -7   71.09    5.60
  -2  -4  -7   68.19    6.60
   2   4  -7   66.09    6.40
  -2   4  -7   62.29    8.50
   2  -4  -7   75.99    7.00
   2   4   7   81.09    6.70
   2  -4  -7   72.59    6.80
  -2   4  -7   68.69    6.60
  -2   4  -7   73.79    7.00
  -2  -4   7   78.79    6.70
   2   4   7   71.49    6.20
   2   4  -8   33.70    3.60
   2   4  -8   31.30    4.90
  -2   4   8   31.30    4.80
  -2  -4  -8   36.10    6.60
  -2   4   8   42.50    6.00
   2  -4   8   31.10    5.10
   2   4  -8   36.50    7.60
  -2  -4  -8   48.50    6.00
  -2  -4  -8   40.80    5.40
   2   4  -8   35.80    4.90
  -2   4  -8   37.40    5.30
   2  -4  -8   27.90    4.80
  -2  -4   8   26.00    4.20
   2  -4  -8   26.90    4.80
   2   4   8   51.39    5.80
   2  -4  -8   36.20    3.90
  -2   4  -8   27.80    6.80
  -2   4  -8   35.40    5.70
   2   4   8   37.70    4.60
  -2  -4  -9    7.00    2.80
   2   4  -9   27.80    7.30
   2   4  -9   19.60    4.20
  -2  -4  -9   18.90    5.10
   2   4  -9   21.20    4.10
   2  -4   9   22.80    4.40
  -2   4   9   16.60    4.10
  -2  -4  -9   18.60    4.20
  -2   4   9   23.20    4.40
  -2   4  -9   12.20    3.60
  -2   4  -9   23.10    4.60
   2  -4  -9   15.20    3.70
   2   4   9   17.10    3.30
  -2   4  -9   18.70    5.70
  -2  -4   9   23.70    4.20
   2  -4  -9   15.00    3.80
   2   4   9    9.80    2.90
  -2   4  10    7.70    3.80
   2  -4  10    7.10    3.30
   2   4 -10    6.80    2.90
  -2  -4 -10    3.20    3.00
  -2  -4 -10    9.90    3.10
   2   4 -10    9.00    5.20
   2   4 -10    9.90    3.40
  -2   4  10   13.20    3.70
  -2  -4 -10   13.80    4.90
  -2  -4  10    7.70    3.00
   2  -4 -10   16.70    4.10
   2  -4 -10   10.80    3.50
  -2   4 -10    8.80    3.80
  -2   4 -10    5.10    2.80
  -2   4 -10    5.90    4.10
   2   4  10   10.10    3.10
  -2   4  11    7.20    3.70
  -2  -4 -11    6.40    2.90
  -2  -4 -11    3.80    3.50
   2   4 -11    3.00    3.10
  -2  -4 -11    1.20    3.10
   2  -4  11    4.70    3.40
   2   4 -11    1.80    2.50
   2   4 -11    3.50    4.30
  -2   4 -11    8.90    3.80
  -2  -4  11    4.30    2.90
   2  -4 -11    9.50    3.60
   2   4  11    1.20    2.60
  -2   4 -11    5.00    2.90
   2  -4 -11    4.10    3.40
  -2   4 -11    5.30    4.70
   2  -4  12   13.10    4.30
  -2  -4 -12   19.50    6.00
  -2  -4 -12   18.60    4.90
   2   4 -12   10.50    6.30
  -2  -4 -12   21.70    5.80
   2   4 -12   18.70    5.10
   2   4 -12   14.70    4.40
  -2   4  12   24.70    5.20
   2   4  12   20.00    4.80
  -2  -4  12   10.80    3.80
  -2   4 -12   18.80    7.30
  -2   4 -12   13.50    5.10
  -2   4 -12   18.40    4.90
   2  -4 -12   17.30    5.20
   2  -4 -12   11.90    4.40
  -2  -4 -13    9.60    3.90
  -2  -4 -13   18.50    5.50
  -2  -4 -13   13.10    5.10
   2   4 -13    9.30    4.90
  -2   4  13   14.60    4.50
   2  -4  13   16.60    4.60
   2   4 -13   14.80    4.50
   2   4 -13   14.80    7.10
  -2   4 -13   17.90    5.00
  -2  -4  13   12.20    4.30
  -2   4 -13   12.80    5.00
   2  -4 -13   12.80    4.70
   2   4  13   12.80    4.40
   2  -4 -13    9.60    5.00
  -2   4 -13   15.90    6.60
   3  -4   0  341.27   21.60
   3   4   0  319.57   21.20
   3   4   0  327.67   20.40
  -3  -4   0  323.77   20.30
  -3   4   0  326.77   22.30
  -3   4   0  334.67   21.40
   3  -4   0  320.87   21.40
  -3  -4   0  327.67   20.40
  -3   4   0  328.77   21.70
   3   4   0  319.17   21.00
   3   4   0  326.47   20.30
  -3  -4  -1  260.97   16.10
  -3  -4  -1  274.27   16.10
  -3   4   1  239.68   17.10
   3  -4   1  226.08   17.00
   3   4  -1  251.17   16.70
  -3   4   1  262.87   16.90
  -3  -4  -1  245.58   17.30
  -3   4   1  258.87   17.10
   3   4  -1  263.37   16.60
  -3   4   1  266.87   17.80
   3  -4   1  249.68   17.00
   3   4  -1  262.17   16.00
  -3   4  -1  232.88   17.10
  -3   4  -1  247.38   16.90
   3   4   1  263.67   16.50
  -3   4  -1  241.18   18.30
   3  -4  -1  268.77   17.00
  -3  -4   1  242.58   16.10
   3   4   1  264.47   16.90
   3   4   1  260.87   16.10
   3   4   1  260.57   16.10
   3  -4  -1  242.48   17.00
  -3   4   2  600.74   38.40
   3   4  -2  597.84   37.70
  -3  -4  -2  607.34   37.80
   3  -4   2  583.84   38.40
  -3   4   2  624.24   38.40
   3  -4   2  588.64   38.00
   3   4  -2  585.84   37.70
   3   4  -2  635.54   38.10
  -3  -4  -2  615.74   37.80
  -3   4   2  593.44   38.70
  -3  -4  -2  611.44   39.10
   3  -4   2  601.14   38.70
   3  -4  -2  608.84   38.50
  -3   4  -2  612.64   38.60
   3   4   2  622.54   37.90
   3   4   2  605.24   37.80
   3   4   2  607.14   38.40
  -3  -4   2  587.54   37.60
  -3   4  -2  593.64   38.40
   3  -4  -2  595.14   38.40
  -3   4  -2  571.14   39.90
  -3   4   3  355.36   24.50
   3   4  -3  398.26   24.10
  -3  -4  -3  370.06   24.20
  -3   4   3  363.86   25.00
   3   4  -3  387.66   24.20
   3  -4   3  390.16   24.80
  -3  -4  -3  367.76   25.40
   3  -4   3  388.26   24.10
  -3   4   3  363.06   24.60
   3   4  -3  382.26   24.30
  -3  -4  -3  369.16   24.20
   3  -4  -3  378.26   24.80
  -3  -4   3  390.76   24.00
  -3   4  -3  392.36   24.70
   3   4   3  363.36   24.30
   3   4   3  360.06   24.10
  -3   4  -3  402.76   24.90
   3   4   3  370.36   24.60
  -3   4  -3  391.56   26.50
   3  -4  -3  363.86   24.70
  -3  -4  -4   32.10    3.40
   3   4  -4   35.00    3.40
  -3   4   4   31.20    3.80
   3  -4   4   29.60    3.80
   3   4  -4   32.70    3.20
  -3  -4  -4   36.60    5.00
  -3   4   4   41.10    3.70
  -3  -4  -4   33.20    3.30
   3  -4   4   29.40    2.90
   3   4  -4   38.00    3.40
  -3   4   4   32.70    4.30
   3   4  -4   42.50    6.30
  -3   4  -4   28.60    3.70
   3   4   4   29.00    3.20
  -3   4  -4   34.70    4.20
   3  -4  -4   33.90    4.10
   3  -4  -4   30.40    3.80
  -3  -4   4   33.10    3.20
  -3   4  -4   31.00    5.70
   3   4   4   33.20    3.40
   3   4   4   36.00    3.50
   3   4  -5   66.49    5.80
   3   4  -5   67.19    7.90
   3   4  -5   62.99    5.80
  -3  -4  -5   77.09    7.20
   3   4  -5   59.89    5.50
  -3   4   5   79.29    6.50
   3  -4   5   63.69    6.10
  -3  -4  -5   77.89    6.00
  -3   4   5   72.19    6.60
  -3  -4  -5   79.49    6.10
  -3   4   5   79.79    6.00
   3  -4  -5   75.99    6.40
   3  -4  -5   76.99    6.30
   3   4   5   73.59    6.00
  -3   4  -5   66.89    6.50
  -3  -4   5   67.29    5.70
   3   4   5   75.89    5.90
  -3   4  -5   71.69    6.10
  -3   4  -5   62.79    7.80
  -3   4   6  129.09   10.60
   3   4  -6  119.69    9.80
   3   4  -6  143.79    9.50
   3   4  -6  139.29   12.70
   3   4  -6  138.29   10.10
  -3  -4  -6  131.89   11.30
  -3  -4  -6  114.29    9.90
  -3   4   6  134.89   10.30
   3  -4   6  146.99   10.50
  -3  -4  -6  122.69    9.90
   3   4   6  148.89   10.10
   3  -4  -6  131.79   10.30
  -3   4  -6  135.29   10.50
   3  -4  -6  125.09   10.30
  -3  -4   6  129.49    9.80
   3   4   6  125.69    9.90
  -3   4  -6  144.49   10.40
  -3   4  -6  133.39   12.60
  -3  -4  -7  128.49   11.10
  -3  -4  -7  124.49    9.60
  -3   4   7  118.39    9.70
   3   4  -7  106.99   11.80
   3   4  -7  112.79    8.60
   3   4  -7  108.99    9.20
   3  -4   7  121.99    9.80
  -3  -4  -7  115.59    9.60
   3   4  -7  121.09    9.60
  -3   4   7  124.69   10.20
   3   4   7  114.39    9.30
  -3  -4   7  109.19    9.10
  -3   4  -7  120.69    9.70
   3  -4  -7  118.09    8.70
  -3   4  -7  129.49   10.30
   3  -4  -7  108.69    9.60
   3  -4  -7  124.39   10.00
   3   4   7  124.99    9.20
  -3   4  -7  112.69   11.90
   3   4  -8   53.99    4.90
   3   4  -8   47.10    6.20
  -3  -4  -8   59.99    7.40
   3  -4   8   51.19    6.70
  -3  -4  -8   63.89    6.50
   3   4  -8   57.69    6.50
   3   4  -8   48.90    9.10
  -3  -4  -8   59.59    6.10
  -3   4   8   53.09    6.80
  -3   4   8   67.09    7.20
   3  -4  -8   62.69    7.40
   3   4   8   55.49    6.40
   3   4   8   59.59    5.60
  -3   4  -8   53.69    6.90
  -3   4  -8   55.79    6.90
  -3  -4   8   58.59    5.90
   3  -4  -8   55.39    6.20
  -3   4  -8   53.69    9.50
   3  -4  -8   51.39    4.90
   3  -4   9   14.10    3.80
  -3   4   9    7.00    3.10
   3   4  -9   13.20    3.80
  -3   4   9   11.50    3.50
  -3  -4  -9   11.00    3.10
  -3  -4  -9   10.50    3.90
   3   4  -9   11.10    4.80
  -3  -4  -9   11.30    3.60
   3   4  -9   11.90    3.10
   3   4   9    9.00    2.80
  -3  -4   9    9.90    3.10
  -3   4  -9    4.70    3.10
   3  -4  -9    5.80    2.80
   3   4   9    8.70    3.20
   3  -4  -9   13.70    2.50
  -3   4  -9   17.40    6.00
  -3   4  -9   16.00    3.70
   3  -4  -9   19.30    4.30
   3   4 -10   18.90    6.70
   3  -4  10   24.30    4.70
   3   4 -10   35.00    5.50
  -3  -4 -10   39.70    6.00
   3   4 -10   24.40    5.20
  -3   4  10   35.00    5.70
  -3  -4 -10   40.10    7.80
  -3  -4 -10   37.00    5.90
  -3   4  10   28.60    5.70
  -3  -4  10   25.50    4.60
  -3   4 -10   32.50    8.20
   3  -4 -10   42.30    6.50
  -3   4 -10   45.30    6.80
   3  -4 -10   42.00    6.30
  -3   4 -10   17.50    4.40
   3   4  10   27.50    5.00
  -3  -4 -11   27.90    6.80
   3   4 -11   29.30    5.70
  -3  -4 -11   34.30    5.80
   3  -4  11   28.70    5.40
  -3   4  11   20.40    4.70
   3   4 -11   30.10    5.40
  -3  -4 -11   31.80    6.20
   3   4 -11   20.00    7.30
  -3  -4  11   31.90    5.60
  -3   4 -11   31.60    5.70
  -3   4 -11   33.40    6.30
  -3   4 -11   33.10    8.70
   3  -4 -11   25.60    5.30
   3  -4 -11   33.70    6.30
   3   4  11   19.30    4.40
  -3  -4 -12   21.00    6.10
   3   4 -12    9.80    4.20
   3  -4  12    8.30    3.90
   3   4 -12   11.20    3.90
  -3  -4 -12   14.40    4.30
  -3   4  12   17.00    4.50
  -3  -4 -12   15.70    5.10
   3   4 -12   13.20    6.60
   3  -4 -12   10.10    4.30
   3  -4 -12    7.80    3.70
  -3   4 -12    9.40    5.60
   3   4  12   15.30    4.30
  -3   4 -12    8.20    3.70
  -3   4 -12    6.50    4.50
  -3  -4  12   10.10    5.70
   3   4 -13   14.30    4.60
  -3  -4 -13   13.00    5.10
  -3  -4 -13    7.80    3.70
  -3  -4 -13    3.30    3.60
  -3   4  13    5.30    3.80
   3  -4  13    6.70    4.00
   3  -4 -13    5.00    3.50
  -3   4 -13    3.10    3.30
   3  -4 -13    4.80    4.30
  -3   4 -13    2.60    4.60
  -3   4 -13   12.50    6.60
   3   4  13   12.50    4.30
   4  -4   0    6.90    2.20
   4   4   0   13.20    2.20
  -4   4   0    7.00    2.30
  -4   4   0   11.70    3.80
  -4   4   0   13.30    2.70
   4   4   0   12.70    2.00
   4  -4   0    8.30    2.40
   4  -4   1  156.88   10.40
   4   4  -1  151.28   10.30
  -4   4   1  160.28   11.20
   4  -4   1  151.08   10.80
  -4  -4  -1  157.38   11.60
  -4  -4  -1  136.09    9.70
  -4   4   1  148.39   10.80
  -4   4   1  147.49   11.80
   4  -4   1  144.29   10.90
  -4  -4  -1  153.98    9.60
   4   4   1  155.98    9.60
  -4   4  -1  152.58   12.70
   4  -4  -1  150.38   10.90
  -4   4  -1  157.58   10.80
   4  -4  -1  144.39   10.70
  -4   4  -1  136.39   10.80
   4   4   1  150.08   10.60
   4   4   1  156.18   10.30
   4  -4   2   13.10    2.90
  -4  -4  -2   11.30    1.50
  -4   4   2   10.20    2.70
  -4  -4  -2   13.40    1.60
  -4   4   2   14.00    2.50
   4   4  -2    8.10    1.20
  -4   4   2    7.40    2.80
  -4   4   2    8.50    2.30
  -4  -4  -2   13.40    3.50
   4   4  -2   13.60    1.30
   4  -4   2   13.40    2.60
   4  -4   2   15.70    2.20
   4   4  -2   11.60    2.00
  -4   4  -2    7.00    2.10
   4   4   2   11.90    1.50
  -4   4  -2   13.80    2.80
  -4   4  -2   14.10    4.70
   4  -4  -2   14.60    2.70
   4   4   2   11.60    2.20
   4   4   2   10.40    1.70
  -4  -4   2   13.60    1.40
   4  -4  -2   14.10    2.50
  -4  -4  -3  257.37   17.30
   4   4  -3  268.07   17.20
  -4  -4  -3  270.77   19.30
  -4   4   3  274.77   18.40
  -4   4   3  268.47   17.90
   4   4  -3  270.37   17.20
   4  -4   3  268.17   17.40
   4  -4   3  265.57   18.00
   4   4  -3  257.17   17.50
  -4   4   3  274.37   17.90
  -4  -4  -3  266.37   17.40
  -4   4  -3  263.27   18.20
  -4   4  -3  247.48   17.80
   4   4   3  263.17   17.20
  -4  -4   3  271.87   17.10
   4  -4  -3  260.57   17.90
   4   4   3  258.57   17.80
  -4   4  -3  265.87   20.10
   4  -4  -3  269.57   18.00
   4  -4   4  393.26   26.80
   4   4  -4  415.86   26.30
  -4   4   4  408.66   27.30
  -4   4   4  410.26   26.70
  -4  -4  -4  413.56   26.40
  -4  -4  -4  417.66   28.20
   4   4  -4  412.16   26.20
  -4  -4  -4  404.76   26.40
   4   4  -4  408.86   26.40
  -4   4   4  422.66   26.90
   4  -4   4  420.26   26.10
  -4  -4   4  393.66   25.30
  -4   4  -4  409.06   29.20
  -4   4  -4  421.16   26.90
   4  -4  -4  419.56   27.00
   4   4   4  389.16   26.20
  -4  -4   4  406.46   26.10
   4   4   4  389.16   26.70
   4  -4  -4  416.66   26.90
  -4   4  -4  385.96   26.90
   4  -4   5   16.60    3.10
  -4   4   5   17.40    2.90
  -4  -4  -5   18.20    4.40
  -4  -4  -5   17.90    3.00
  -4   4   5   14.60    2.90
   4   4  -5   16.40    2.70
   4   4  -5   14.90    2.50
   4   4  -5   16.80    2.70
  -4  -4  -5   16.30    2.60
  -4   4   5   16.90    3.50
   4   4   5   15.80    2.60
  -4   4  -5   14.00    4.60
   4  -4  -5   15.50    3.20
   4  -4  -5   13.40    2.70
   4   4   5   17.40    3.00
  -4   4  -5   19.80    3.40
  -4  -4   5   17.90    2.60
  -4   4  -5   13.20    2.90
  -4   4   6   14.30    3.20
  -4  -4  -6   17.00    4.50
  -4   4   6   14.20    3.60
  -4  -4  -6   19.40    3.20
   4   4  -6   17.50    2.90
  -4   4   6   15.60    2.90
   4   4  -6   21.10    3.20
   4  -4   6   15.50    3.60
   4   4  -6   21.80    3.40
  -4  -4  -6   22.10    3.60
   4  -4  -6   11.60    3.00
   4  -4  -6   19.30    2.90
  -4   4  -6   19.00    4.00
   4   4   6   18.10    3.10
  -4  -4   6   21.00    3.10
   4   4   6   21.10    3.30
  -4   4  -6   19.20    5.50
   4  -4  -6   15.90    3.60
  -4   4  -6   25.60    4.00
  -4   4   7   16.50    3.50
  -4  -4  -7   11.60    2.90
  -4   4   7   12.60    3.30
   4   4  -7   12.40    2.90
   4   4  -7   10.00    2.80
  -4  -4  -7   13.60    4.20
   4   4  -7   12.40    2.50
   4  -4   7    9.30    2.90
  -4  -4  -7   20.80    3.70
   4  -4  -7    8.50    2.70
   4   4   7   15.40    3.10
   4  -4  -7   15.50    3.30
  -4   4  -7    8.60    2.70
  -4   4  -7    6.00    3.90
   4   4   7   13.00    2.80
  -4   4  -7   18.90    4.10
  -4  -4   7    5.40    2.20
   4  -4  -7   11.90    2.40
  -4  -4  -8   49.50    7.80
   4  -4   8   34.30    5.20
  -4   4   8   44.70    6.00
  -4   4   8   44.40    6.50
   4   4  -8   31.20    5.20
  -4  -4  -8   43.60    5.80
   4   4  -8   45.80    4.80
   4   4  -8   34.30    5.00
  -4  -4  -8   45.70    5.60
  -4   4  -8   34.00    5.50
   4   4   8   40.50    5.30
  -4   4  -8   40.00    8.30
   4  -4  -8   39.40    5.70
  -4   4  -8   30.90    5.10
  -4  -4   8   34.50    4.90
   4  -4  -8   47.80    6.20
   4   4   8   43.00    5.20
   4  -4  -8   40.30    4.60
   4  -4   9   64.79    8.10
  -4   4   9   95.69    8.40
  -4  -4  -9   84.59    8.00
   4   4  -9   69.59    7.20
  -4   4   9   73.99    8.30
   4   4  -9   68.89    7.60
  -4  -4  -9   86.99    7.80
  -4  -4  -9   79.89    9.30
   4   4  -9   74.79    6.40
   4  -4  -9   78.69    7.80
  -4   4  -9   67.79    8.50
   4  -4  -9   93.09    8.40
   4   4   9   70.69    7.20
   4   4   9   75.69    6.90
  -4   4  -9   71.49   10.00
  -4   4  -9   63.89    8.10
  -4  -4   9   77.19    7.40
   4  -4  -9   76.79    6.60
  -4  -4 -10   18.40    4.50
  -4  -4 -10   26.10    6.60
  -4  -4 -10   31.40    5.20
   4  -4  10   19.30    4.40
  -4   4  10   26.20    5.50
  -4   4  10   25.90    5.10
   4   4 -10   25.80    4.70
   4   4 -10   15.10    4.30
   4  -4 -10   23.90    5.10
   4  -4 -10   26.90    5.30
  -4   4 -10   19.00    5.10
  -4   4 -10   16.20    4.30
  -4   4 -10   27.70    7.30
  -4  -4  10   25.70    4.70
   4   4  10   19.90    4.30
  -4  -4 -11   19.00    4.40
  -4   4  11   20.10    4.80
   4  -4  11   20.40    4.80
  -4   4  11   17.80    5.10
  -4  -4 -11   16.40    5.40
  -4  -4 -11   20.60    4.80
   4   4 -11   12.80    3.80
   4   4 -11   11.50    6.00
  -4   4 -11   16.80    5.20
  -4   4 -11   17.80    4.40
   4  -4 -11   22.90    5.40
  -4   4 -11   15.90    6.30
   4  -4 -11   24.10    5.10
   4   4  11   20.80    4.60
  -4  -4 -12   43.70    7.40
  -4  -4 -12   46.60    8.80
  -4   4  12   39.30    6.80
   4   4 -12   62.09    8.20
  -4  -4 -12   41.40    6.60
   4  -4  12   35.50    6.60
  -4   4 -12   34.20    6.80
   4  -4 -12   52.09    8.30
  -4   4 -12   53.69    7.70
   4   4  12   33.80    6.20
   4  -4 -12   44.10    7.20
  -4   4 -12   45.00   10.10
  -4  -4 -13   30.30    6.90
  -4  -4 -13   27.10    6.00
   4   4 -13   36.80    6.60
  -4  -4 -13   41.80    9.60
   4  -4  13   30.20    6.60
  -4   4  13   37.70    6.80
   4  -4 -13   37.60    7.00
  -4   4 -13   32.30    6.60
   4  -4 -13   29.50    6.70
  -4   4 -13   24.40    6.70
   4   4  13   26.80    5.90
  -4   4 -13   36.00    9.60
  -5   4   0  246.98   17.70
   5   4   0  280.57   17.10
  -5   4   0  265.67   19.30
   5  -4   0  263.27   17.20
   5  -4   0  257.47   17.50
  -5   4   0  250.97   17.50
   5  -4   0  231.48   17.50
  -5  -4   0  264.97   18.70
   5   4  -1  184.68   12.60
   5  -4   1  185.78   13.30
   5  -4   1  209.48   13.30
   5  -4   1  195.38   12.70
  -5   4   1  191.58   13.40
  -5  -4  -1  180.88   11.70
  -5   4   1  176.88   13.00
  -5  -4  -1  176.28   11.70
  -5   4   1  174.38   14.40
  -5  -4  -1  176.68   14.10
   5  -4  -1  173.48   12.90
   5   4   1  179.28   11.70
   5   4   1  182.58   12.90
  -5   4  -1  193.68   13.40
   5  -4  -1  187.68   13.10
  -5   4  -1  205.78   13.10
   5  -4  -1  173.88   12.70
  -5   4  -1  194.68   15.50
   5   4   1  188.18   11.70
   5   4   1  178.58   12.40
  -5  -4  -2   21.60    2.10
  -5   4   2   20.10    3.30
   5   4  -2   25.50    2.10
   5   4  -2   22.70    3.00
   5  -4   2   22.90    3.40
  -5  -4  -2   23.00    4.80
  -5   4   2   25.00    3.90
   5  -4   2   24.30    3.20
  -5  -4  -2   23.50    2.30
  -5   4   2   23.20    4.80
  -5   4   2   28.50    3.70
   5  -4   2   21.90    3.90
   5   4   2   21.70    3.20
   5  -4  -2   26.90    3.50
   5   4   2   22.10    2.90
  -5   4  -2   29.00    6.50
  -5   4  -2   21.60    3.40
   5   4   2   23.80    2.20
  -5   4  -2   25.30    4.00
   5  -4  -2   29.70    3.90
   5   4  -3  316.47   19.70
  -5  -4  -3  303.57   19.90
   5   4  -3  335.27   20.40
   5  -4   3  308.97   20.70
   5  -4   3  302.17   20.90
  -5   4   3  312.87   20.60
  -5   4   3  300.37   21.00
  -5  -4  -3  300.27   19.80
   5  -4   3  305.87   20.10
  -5  -4  -3  299.57   22.40
   5   4  -3  305.27   19.70
  -5   4   3  301.47   20.50
  -5   4  -3  308.67   20.60
   5  -4  -3  311.67   20.70
  -5   4  -3  276.77   20.70
   5   4   3  317.07   20.70
   5  -4  -3  300.97   20.70
   5   4   3  297.67   19.80
  -5   4  -3  319.37   23.60
  -5  -4   3  311.87   19.60
   5   4   3  308.67   19.90
   5   4  -4  116.09    7.80
   5  -4   4  109.99    8.50
   5   4  -4  110.39    7.40
   5   4  -4  102.29    7.40
   5  -4   4  102.99    7.50
  -5  -4  -4   98.49    7.60
  -5  -4  -4   90.39   10.20
  -5  -4  -4   98.29    7.40
  -5   4   4   95.49    8.40
  -5   4   4   92.49    7.90
  -5   4   4   95.79    8.20
  -5   4  -4   98.49    8.00
  -5  -4   4  110.19    7.30
   5  -4  -4   94.09    8.20
  -5   4  -4  104.39    8.40
  -5   4  -4  101.09   10.90
   5  -4  -4   96.29    8.10
   5   4   4   97.79    7.40
   5   4   4   99.89    8.00
   5   4  -5   13.90    2.40
  -5  -4  -5   22.50    5.50
   5   4  -5   14.30    2.60
   5   4  -5   14.80    2.60
  -5  -4  -5   14.10    2.50
   5  -4   5   17.90    3.50
  -5   4   5   20.30    3.80
  -5   4   5   15.40    3.30
  -5   4   5   16.20    3.00
  -5  -4  -5   14.80    2.70
   5   4   5   14.40    2.50
   5  -4  -5   16.10    3.40
  -5  -4   5   12.50    2.30
  -5   4  -5   14.90    3.60
   5   4   5   14.70    3.00
   5  -4  -5   14.30    3.10
  -5   4  -5   12.60    5.00
  -5   4  -5   15.70    3.10
  -5   4   6    8.80    2.80
   5  -4   6   15.00    3.50
  -5  -4  -6   13.10    2.70
   5   4  -6    8.30    2.20
  -5   4   6    7.60    3.00
   5   4  -6   13.70    2.70
   5  -4   6    8.50    1.50
   5   4  -6   10.20    2.40
  -5  -4  -6   10.20    4.30
  -5   4   6   13.40    2.80
  -5  -4  -6    9.50    2.70
   5   4   6   16.80    3.10
   5  -4  -6   10.50    2.90
  -5   4  -6   17.90    4.00
  -5  -4   6   15.00    2.60
   5  -4  -6   10.50    2.50
   5   4   6   13.50    2.70
  -5   4  -6   11.90    5.40
  -5   4  -6   14.30    3.20
   5  -4  -6    8.60    2.70
  -5   4   7   26.60    4.60
  -5  -4  -7   33.60    6.60
  -5  -4  -7   32.10    4.60
   5   4  -7   36.40    4.30
  -5  -4  -7   28.80    4.30
   5   4  -7   34.60    4.60
   5  -4   7   38.00    5.30
  -5   4   7   42.40    6.00
   5   4  -7   31.40    4.40
  -5   4   7   36.50    4.60
  -5  -4   7   32.90    4.20
  -5   4  -7   25.30    4.60
   5  -4  -7   33.40    4.20
   5  -4  -7   31.80    4.90
   5  -4  -7   35.80    5.40
  -5   4  -7   24.40    6.50
   5   4   7   37.60    4.70
  -5   4  -7   37.50    5.80
   5   4   7   28.50    4.20
  -5   4   8   62.59    7.70
  -5   4   8   73.89    8.00
   5   4  -8   78.19    7.20
   5  -4   8   85.09    7.80
  -5  -4  -8   75.59    7.50
  -5  -4  -8   69.99    8.80
   5   4  -8   83.49    6.70
   5   4  -8   82.79    7.40
  -5  -4  -8   71.59    7.10
   5   4   8   69.89    7.00
   5  -4  -8   69.29    7.40
  -5  -4   8   77.59    7.00
   5  -4  -8   62.39    7.20
  -5   4  -8   73.39    7.40
  -5   4  -8   79.99   10.50
  -5   4  -8   75.69    8.10
   5   4   8   71.79    6.90
   5  -4  -8   73.89    6.60
   5   4  -9    7.80    3.40
  -5  -4  -9   10.00    3.30
   5  -4   9    5.40    3.20
   5   4  -9   11.70    3.30
  -5   4   9    5.30    2.80
  -5   4   9    5.50    3.00
  -5  -4  -9    7.50    2.70
   5   4  -9    1.80    2.00
  -5  -4  -9    6.90    3.60
   5   4   9    6.90    2.80
   5  -4  -9    3.10    2.80
   5  -4  -9    3.50    2.70
   5   4   9    4.60    2.40
  -5   4  -9    5.30    2.90
  -5   4  -9   11.00    5.20
   5  -4  -9    4.00    2.20
   5  -4  -9    3.90    2.20
  -5   4  -9   11.30    3.80
  -5  -4 -10   15.70    5.00
  -5  -4 -10   15.50    3.90
  -5   4  10    4.10    3.20
  -5   4  10    8.00    3.40
   5   4 -10   14.30    3.70
  -5  -4 -10   13.70    4.00
   5  -4  10   17.80    4.20
   5  -4 -10   15.00    4.20
  -5   4 -10   14.20    5.90
   5   4  10    8.10    3.20
  -5   4 -10   16.90    4.10
   5  -4 -10   18.20    4.30
  -5   4 -10   13.90    4.50
  -5   4  11    5.80    3.60
  -5  -4 -11   10.70    4.20
   5  -4  11    9.50    3.80
  -5   4  11   -0.60    3.10
  -5  -4 -11    5.30    3.00
  -5  -4 -11    7.70    3.80
   5   4 -11    8.40    3.40
   5  -4 -11   10.80    4.00
  -5   4 -11    9.20    4.20
  -5   4 -11    7.80    3.60
  -5   4 -11   12.60    5.60
   5   4  11    3.20    2.80
   5  -4 -11    3.30    3.10
  -5   4  12   28.10    5.60
  -5  -4 -12   31.70    6.70
   5  -4  12   37.20    6.90
  -5  -4 -12   45.90    8.90
  -5  -4 -12   40.10   10.10
   5   4 -12   45.70    7.30
   5  -4 -12   51.49    7.70
   5   4  12   30.80    5.90
  -5   4 -12   48.80    7.90
  -5   4 -12   41.00    7.60
   5  -4 -12   33.50    6.50
  -5   4 -12   48.70   10.40
  -5  -4 -13   10.30    4.70
   5  -4  13    8.90    4.50
   5   4 -13   12.80    4.60
  -5   4  13    6.20    4.10
   5  -4 -13    8.70    4.40
   5  -4 -13    8.60    4.40
  -5   4 -13   10.10    4.10
  -5   4 -13   12.10    5.50
   5   4  13   12.00    4.30
  -5   4 -13   22.80    7.30
   6  -4   0  351.76   23.00
   6   4   0  357.36   22.40
  -6   4   0  305.87   24.50
   6  -4   0  343.57   22.50
  -6   4   0  346.77   22.80
  -6  -4   0  342.57   24.40
  -6   4   0  354.76   23.30
   6  -4   0  323.27   22.70
  -6   4   1  689.13   43.20
  -6  -4  -1  676.83   41.30
   6  -4   1  622.84   42.60
  -6  -4  -1  675.93   44.40
  -6  -4  -1  658.83   41.40
   6   4  -1  656.03   42.30
   6  -4   1  621.94   42.80
  -6   4   1  688.13   42.70
   6  -4   1  642.34   42.40
  -6   4   1  711.73   44.90
   6  -4  -1  684.23   42.50
  -6   4  -1  556.24   42.70
  -6   4  -1  651.23   42.60
   6   4   1  662.93   42.20
  -6   4  -1  654.23   45.30
   6  -4  -1  691.93   42.80
   6  -4  -1  677.63   42.70
   6   4   1  686.73   41.30
   6   4   1  698.23   41.30
  -6  -4  -2  147.99   12.90
  -6   4   2  150.38   11.10
  -6   4   2  156.48   11.50
   6  -4   2  157.68   10.60
   6  -4   2  135.49   11.20
   6   4  -2  151.88   10.60
  -6  -4  -2  141.89    9.70
  -6  -4  -2  150.88    9.90
   6   4  -2  142.89    9.50
  -6   4   2  150.18   12.90
   6   4  -2  146.39    9.60
   6  -4   2  122.29   10.70
   6  -4  -2  157.48   11.10
  -6   4  -2  136.79   10.70
  -6   4  -2  131.39   13.50
  -6  -4   2  150.58    9.60
   6  -4  -2  162.48   10.80
   6   4   2  149.88   10.30
   6   4   2  150.68    9.70
   6  -4  -2  156.88   11.00
  -6   4  -2  140.79   11.20
   6   4  -3  722.83   46.00
   6  -4   3  663.83   46.90
   6   4  -3  677.73   46.10
  -6  -4  -3  750.32   46.20
   6  -4   3  702.33   46.60
  -6  -4  -3  759.72   46.20
  -6   4   3  795.22   47.20
  -6  -4  -3  762.52   49.50
   6   4  -3  686.33   46.60
  -6   4   3  768.52   47.60
   6  -4   3  712.63   47.40
  -6   4   3  763.32   47.10
   6   4   3  741.33   46.30
  -6   4  -3  667.73   49.80
   6   4   3  758.12   47.20
  -6   4  -3  719.23   47.30
   6  -4  -3  780.22   47.30
   6   4   3  752.12   46.10
  -6  -4   3  700.83   45.90
   6  -4  -3  775.22   47.10
   6  -4  -3  774.62   46.90
  -6   4  -3  701.63   46.90
  -6   4   4    7.40    2.70
  -6  -4  -4   12.80    5.40
  -6   4   4   10.00    2.70
  -6  -4  -4   11.60    2.20
   6   4  -4   13.80    2.60
  -6   4   4    9.60    2.80
   6   4  -4   16.80    2.30
   6  -4   4   12.00    3.80
  -6  -4  -4   11.60    2.10
   6  -4   4   13.80    3.20
   6   4  -4   14.00    2.10
   6  -4  -4    6.30    2.30
   6  -4  -4    4.30    2.50
   6   4   4   11.20    2.10
  -6   4  -4   12.00    2.80
  -6  -4   4   15.70    2.20
  -6   4  -4   11.90    6.10
   6  -4  -4   10.70    2.40
   6   4   4   11.30    2.60
   6   4   4    8.60    1.90
  -6   4  -4   13.10    3.70
   6  -4  -4    7.30    2.30
   6   4  -5   34.30    3.50
  -6   4   5   21.00    4.20
  -6  -4  -5   27.80    3.60
  -6  -4  -5   20.40    6.30
   6  -4   5   42.80    5.10
   6  -4   5   31.80    2.90
  -6   4   5   24.00    4.30
  -6  -4  -5   24.30    3.70
  -6   4   5   26.20    4.00
   6   4  -5   31.60    4.00
   6   4  -5   37.00    3.50
  -6   4  -5   39.50    5.20
   6   4   5   27.20    3.60
   6  -4  -5   27.90    4.10
   6  -4  -5   23.60    4.00
  -6   4  -5   36.60    7.70
   6   4   5   25.50    3.90
  -6   4  -5   38.20    4.90
  -6  -4   5   34.80    3.80
   6  -4  -5   23.10    4.00
   6  -4  -5   28.90    4.20
  -6  -4  -6   13.30    2.50
   6   4  -6   10.80    2.50
   6  -4   6   12.00    3.20
  -6  -4  -6   12.10    3.00
[truncated: 879,211 more chars]
