# Supplementary material for: Odd–even alternations in helical propensity of a homologous series of hydrocarbons
Source: Springer Nature journal article supplement (doi:10.1038/s41557-020-0429-0), 2020-03-02
Supplement: 41557_2020_429_MOESM106_ESM.mol [file 41557_2020_429_MOESM106_ESM.mol]

nchem.19030558B-compC10.mol
  ChemDraw01162015362D

 24 23  0  0  1  0  0  0  0  0999 V2000
   -3.2151   -0.2062    0.0000 C   0  0  0  0  0  0  0  0  0  0  0  0
   -2.5006    0.2062    0.0000 C   0  0  0  0  0  0  0  0  0  0  0  0
   -1.7862   -0.2062    0.0000 C   0  0  0  0  0  0  0  0  0  0  0  0
   -1.0717    0.2062    0.0000 C   0  0  0  0  0  0  0  0  0  0  0  0
   -0.3572   -0.2062    0.0000 C   0  0  0  0  0  0  0  0  0  0  0  0
    0.3572    0.2062    0.0000 C   0  0  0  0  0  0  0  0  0  0  0  0
    1.0717   -0.2062    0.0000 C   0  0  0  0  0  0  0  0  0  0  0  0
    1.7862    0.2062    0.0000 C   0  0  0  0  0  0  0  0  0  0  0  0
    2.5006   -0.2062    0.0000 C   0  0  0  0  0  0  0  0  0  0  0  0
    3.2151    0.2062    0.0000 C   0  0  0  0  0  0  0  0  0  0  0  0
   -2.5006    1.0313    0.0000 C   0  0  0  0  0  0  0  0  0  0  0  0
   -1.7862   -1.0313    0.0000 C   0  0  0  0  0  0  0  0  0  0  0  0
   -1.0717    1.0313    0.0000 C   0  0  0  0  0  0  0  0  0  0  0  0
   -0.3572   -1.0313    0.0000 C   0  0  0  0  0  0  0  0  0  0  0  0
    0.3572    1.0313    0.0000 C   0  0  0  0  0  0  0  0  0  0  0  0
    1.0717   -1.0313    0.0000 C   0  0  0  0  0  0  0  0  0  0  0  0
    1.7862    1.0313    0.0000 C   0  0  0  0  0  0  0  0  0  0  0  0
    2.5006   -1.0313    0.0000 C   0  0  0  0  0  0  0  0  0  0  0  0
   -3.9296    0.2063    0.0000 C   0  0  0  0  0  0  0  0  0  0  0  0
    3.9296   -0.2062    0.0000 C   0  0  0  0  0  0  0  0  0  0  0  0
   -3.2151   -1.0312    0.0000 C   0  0  0  0  0  0  0  0  0  0  0  0
    3.2151    1.0313    0.0000 C   0  0  0  0  0  0  0  0  0  0  0  0
   -4.6441    0.6188    0.0000 C   0  0  0  0  0  0  0  0  0  0  0  0
    4.6441   -0.6187    0.0000 C   0  0  0  0  0  0  0  0  0  0  0  0
  1  2  1  0      
  2  3  1  0      
  3  4  1  0      
  4  5  1  0      
  5  6  1  0      
  6  7  1  0      
  7  8  1  0      
  8  9  1  0      
  9 10  1  0      
  2 11  1  1      
  3 12  1  1      
  4 13  1  1      
  5 14  1  1      
  6 15  1  1      
  7 16  1  1      
  8 17  1  1      
  9 18  1  1      
  1 19  1  0      
 10 20  1  0      
  1 21  1  1      
 10 22  1  1      
 19 23  3  0      
 20 24  3  0      
M  END
